# Supplementary material
Source: publisher figshare collection journal article supplement (https://acs.figshare.com/ndownloader/files/6474492)
Supplement: Supplementary file 1 [file 6474492]

# **Supporting Information**

*The Journal of Organic Chemistry*

## **Synthesis of Substituted 2,3-Benzodiazepines**

Chieh-Kai Chan, Yu-Lin Tsai, Yi-Ling Chan and Meng-Yang Chang\*

*Department of Medicinal and Applied Chemistry, and General Research Centers of R&D office,  
Kaohsiung Medical University, Kaohsiung 807, Taiwan*

Email: [mychang@kmu.edu.tw](mailto:mychang@kmu.edu.tw)

|      |                                                                                                       |             |
|------|-------------------------------------------------------------------------------------------------------|-------------|
| I.   | Scanned Photocopies of $^1\text{H}$ and $^{13}\text{C}$ NMR Spectra for Compounds <b>1a~1aa</b> ..... | S-2~S-109   |
| II.  | Scanned Photocopies of $^1\text{H}$ and $^{13}\text{C}$ NMR Spectra for Compounds <b>6a~6aa</b> ..... | S-110~S-217 |
| III. | Scanned Photocopies of $^1\text{H}$ and $^{13}\text{C}$ NMR Spectra for Compounds <b>8a~8b</b> .....  | S-218~S-221 |
| IV.  | Scanned Photocopies of $^1\text{H}$ and $^{13}\text{C}$ NMR Spectra for Compounds <b>9a~9d</b> .....  | S-222~S-234 |
| V.   | Scanned Photocopies of $^1\text{H}$ and $^{13}\text{C}$ NMR Spectra for Compound <b>10</b> .....      | S-235~S-238 |
| VI.  | Crystal Data for Compounds <b>1a, 1c, 1p, 7y</b> and <b>9a</b> .....                                  | S-239~S-243 |

Total Pages of Supporting Information : (243).

## Compound 1a

YR1040701

Pulse Sequence: s2pu1  
UNITYplus-400 "unity400"  
Date: Jul 2 2015  
Solvent: CDCl<sub>3</sub>  
Ambient temperature  
Total 64 repetitions

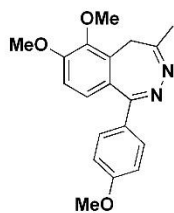

Compound 1a  
<sup>1</sup>H NMR (400 MHz, CDCl<sub>3</sub>) spectra

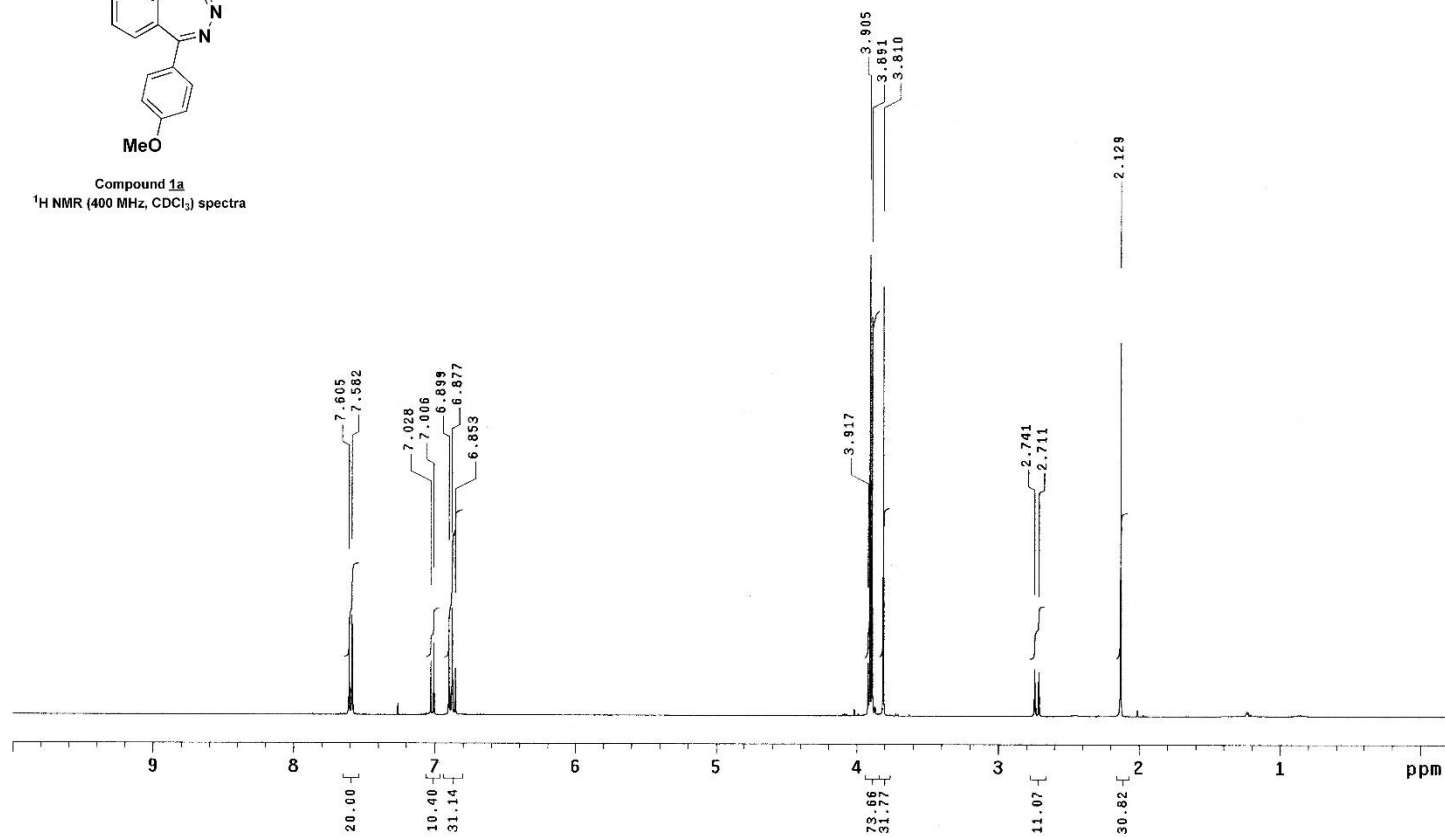

## Compound 1a

YR1040701

Pulse Sequence: s2pu1

UNITYplus-400 "unity400"

Date: Jul 2 2015

Solvent: CDCl<sub>3</sub>

Ambient temperature

Total 64 repetitions



Compound 1a

<sup>1</sup>H NMR (400 MHz, CDCl<sub>3</sub>) spectra

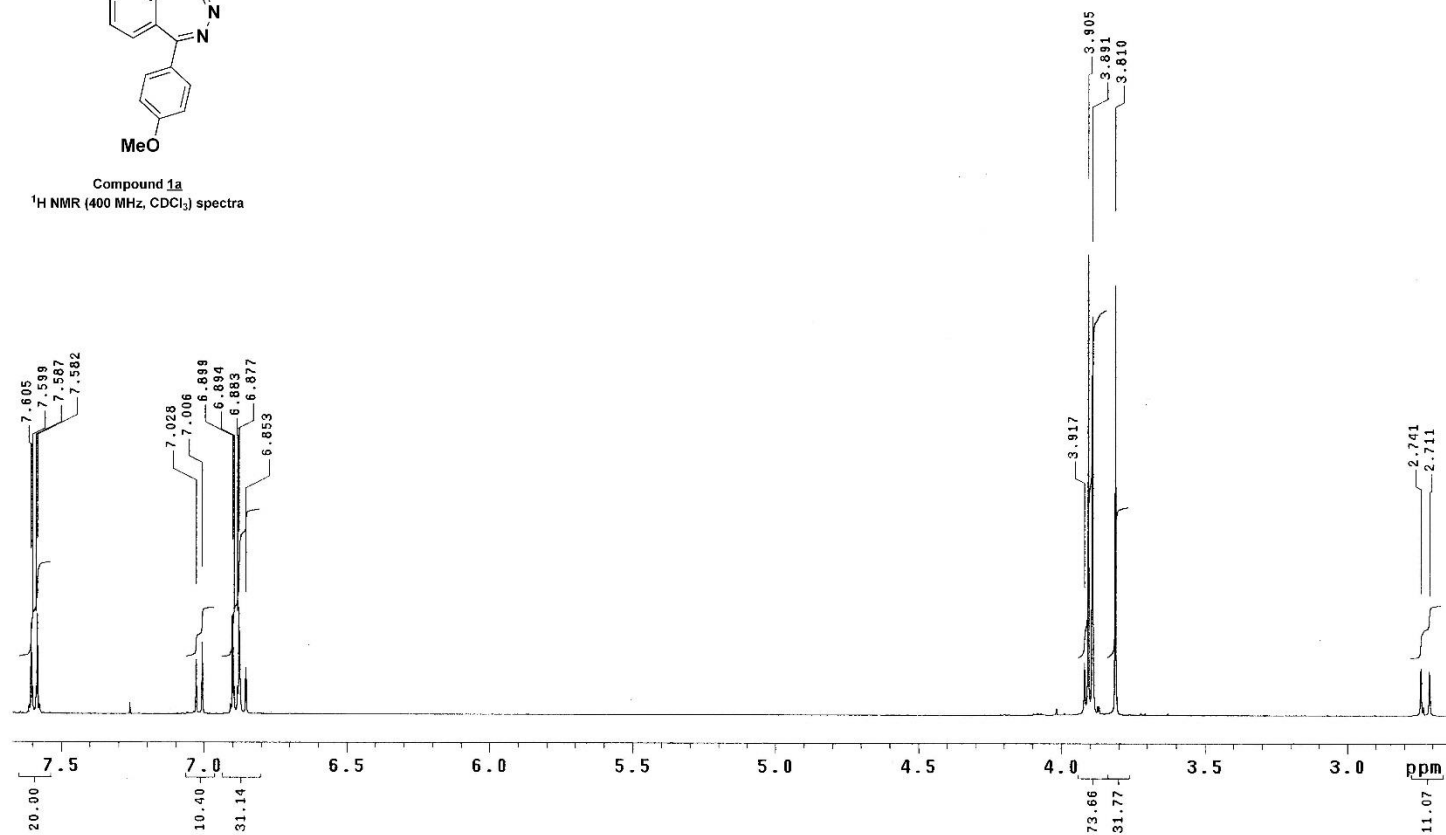

## Compound 1a

YR1040701

Pulse Sequence: s2pul

UNITYplus-400 "unity400"

Date: Jul 2 2015

Solvent: CDCl<sub>3</sub>

Ambient temperature

Total 1632 repetitions

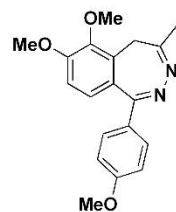

Compound 1a

<sup>13</sup>C NMR (100 MHz, CDCl<sub>3</sub>) spectra

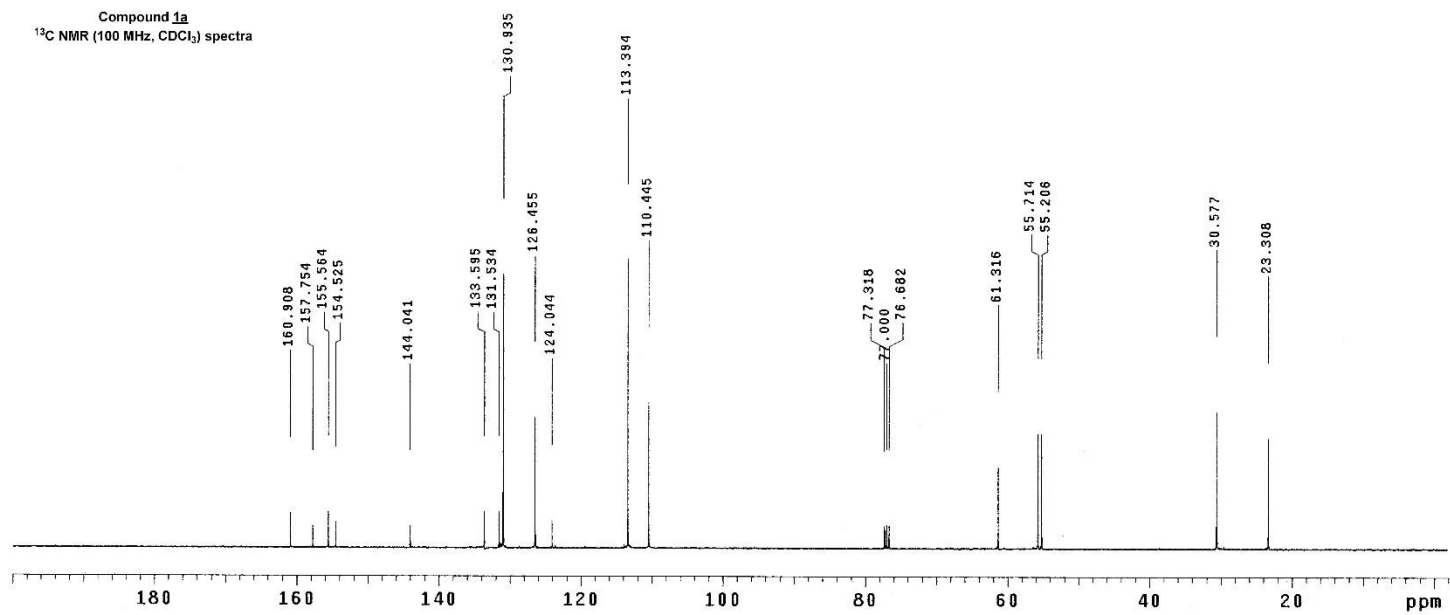



## Compound 1b

YL1040716

Pulse Sequence: s2pu1  
UNITYplus-400 "unity400"  
Date: Jul 20 2015  
Solvent: CDCl<sub>3</sub>  
Ambient temperature  
Total 64 repetitions

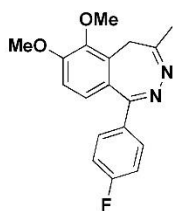

Compound 1b  
<sup>1</sup>H NMR (400 MHz, CDCl<sub>3</sub>) spectra

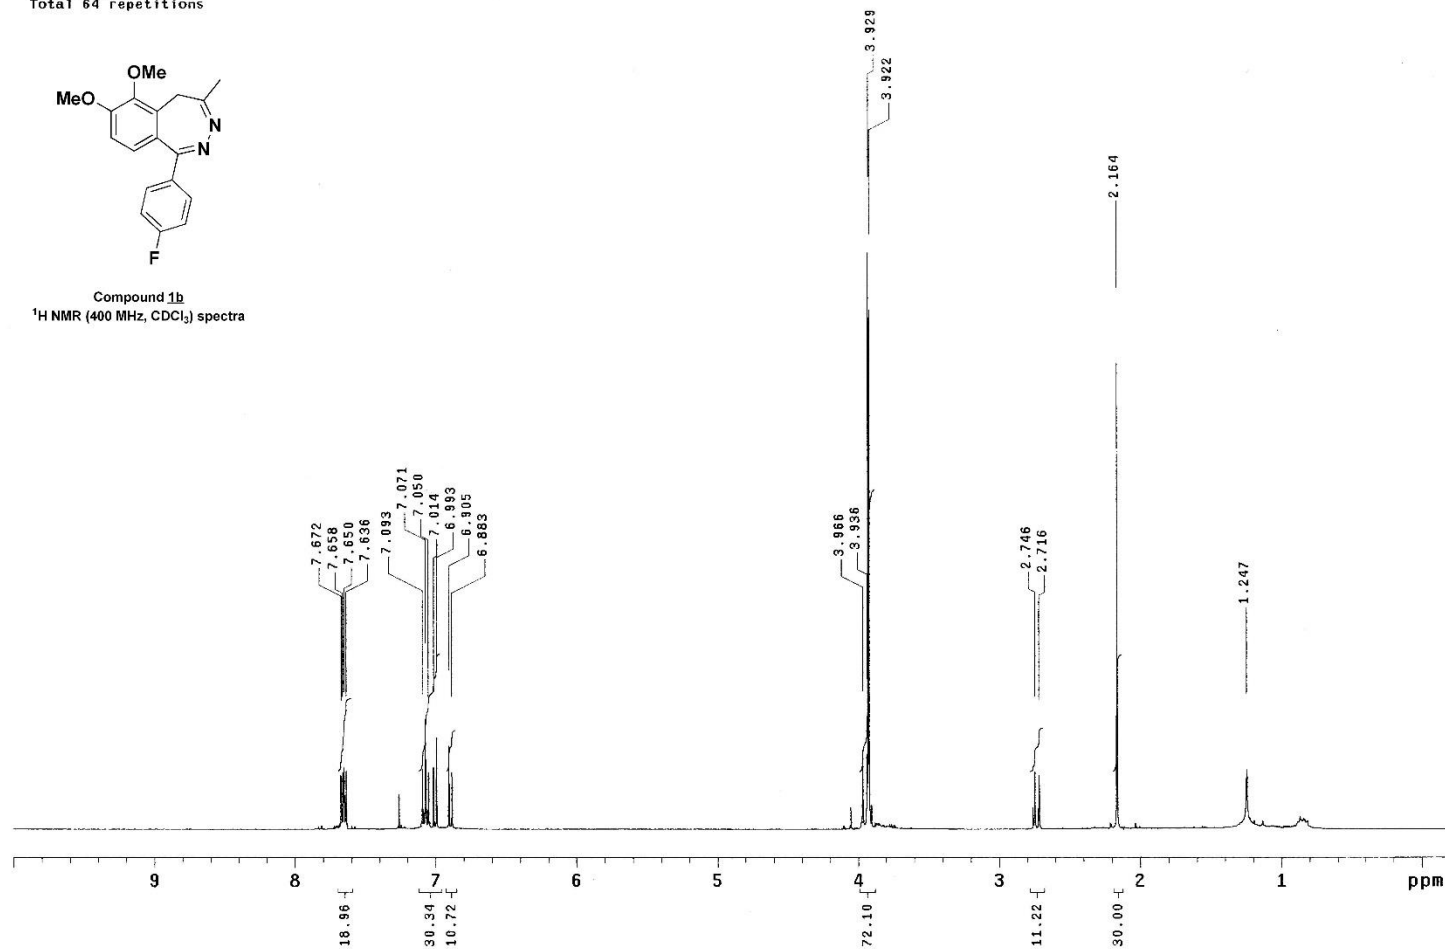

## Compound 1b

YL1040716

Pulse Sequence: s2pu1  
UNITYplus-400 "unity400"  
Date: Jul 20 2015  
Solvent: CDCl<sub>3</sub>  
Ambient temperature  
Total 64 repetitions



Compound 1b  
<sup>1</sup>H NMR (400 MHz, CDCl<sub>3</sub>) spectra

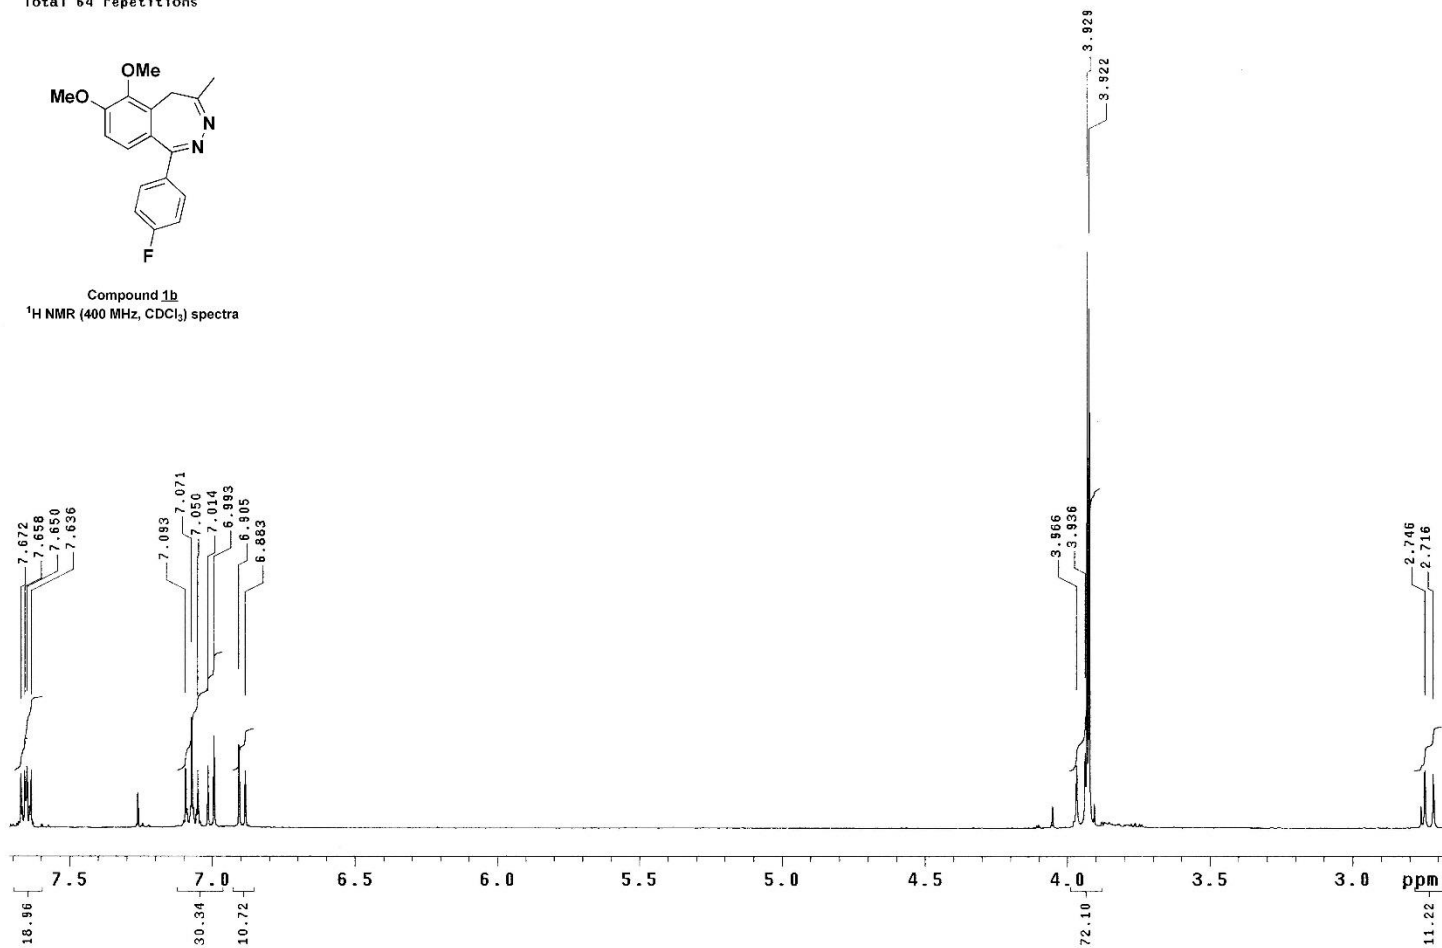

## Compound 1b

YL1040716

Pulse Sequence: s2pul  
UNITYplus-400 "unity400"  
Date: Jul 20 2015  
Solvent: CDCl<sub>3</sub>  
Ambient temperature  
Total 2128 repetitions

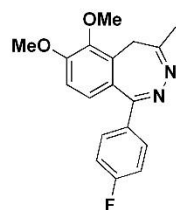

Compound 1b  
<sup>13</sup>C NMR (100 MHz, CDCl<sub>3</sub>) spectra

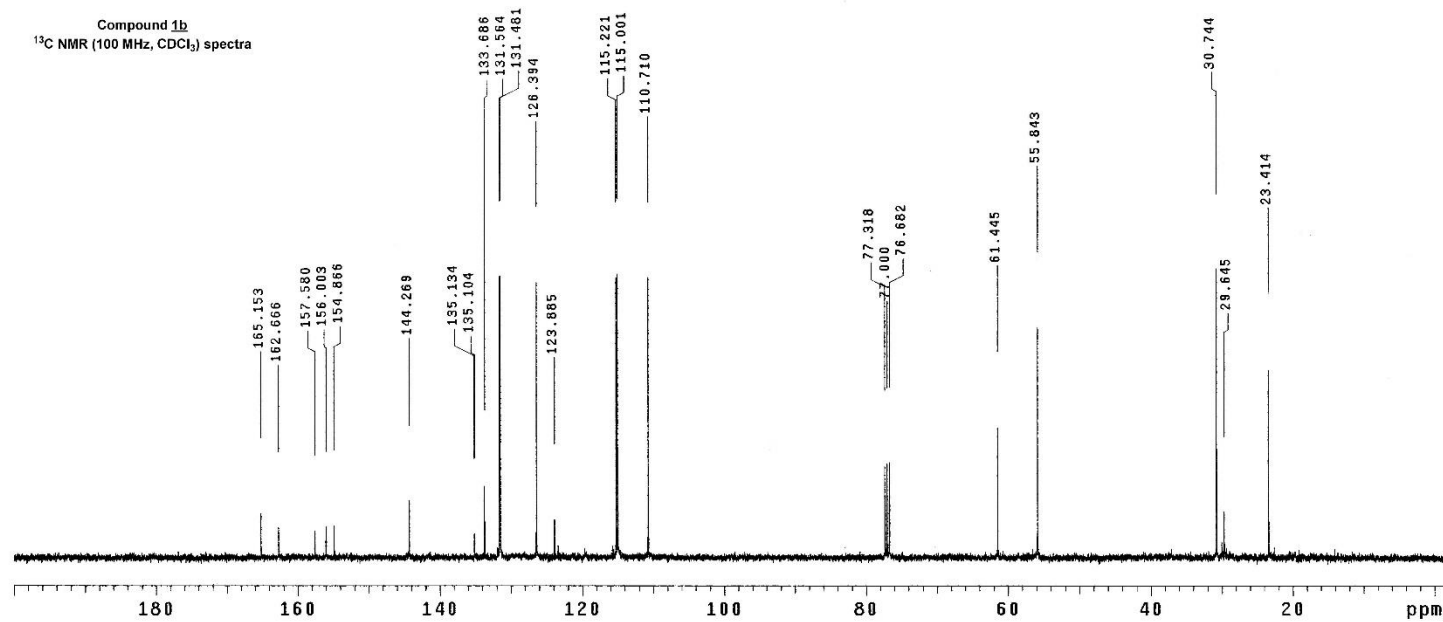

## Compound 1b

YL1040716

Pulse Sequence: s2pul  
UNITYplus-400 "unity400"  
Date: Jul 20 2015  
Solvent: CDCl<sub>3</sub>  
Ambient temperature  
Total 2128 repetitions



Compound 1b

<sup>13</sup>C NMR (100 MHz, CDCl<sub>3</sub>) spectra

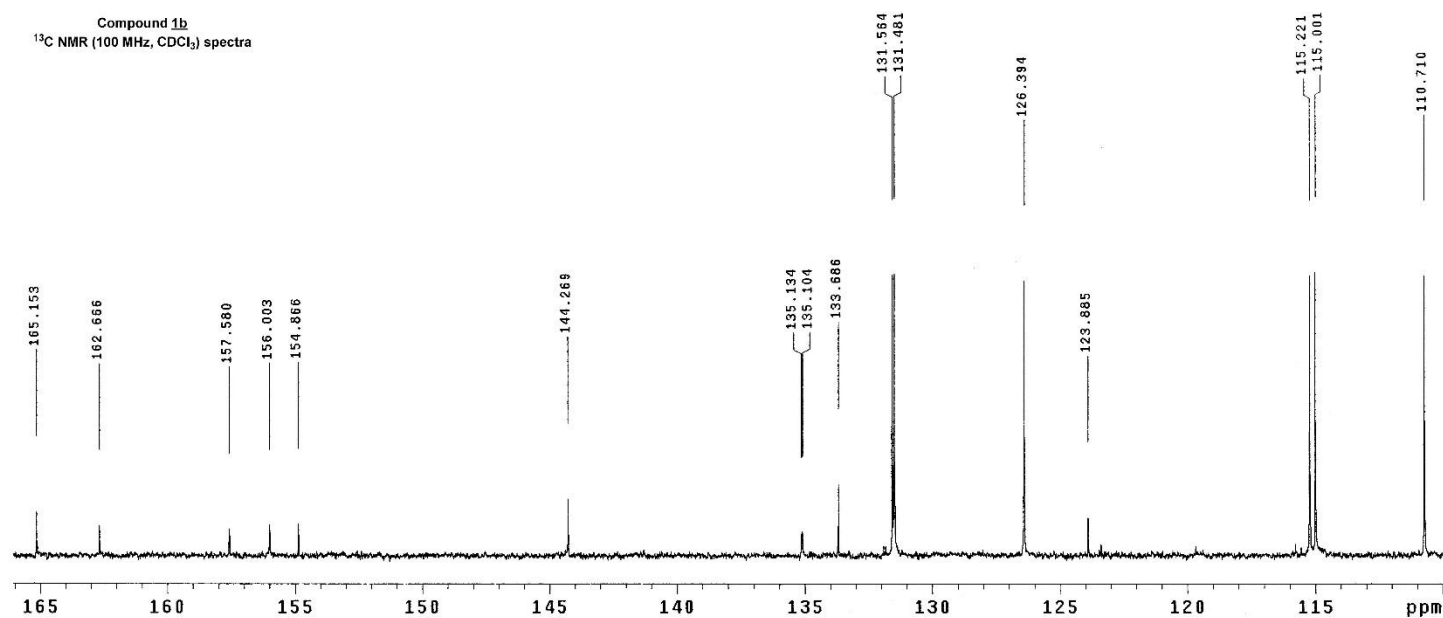

## Compound 1c

YL1040906

Pulse Sequence: s2pul  
UNITYplus-400 "unity400"  
Date: Sep 8 2015  
Solvent: CDCl<sub>3</sub>  
Ambient temperature  
Total 64 repetitions

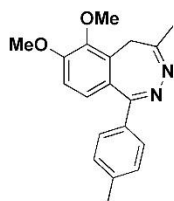

Compound 1c  
<sup>1</sup>H NMR (400 MHz, CDCl<sub>3</sub>) spectra

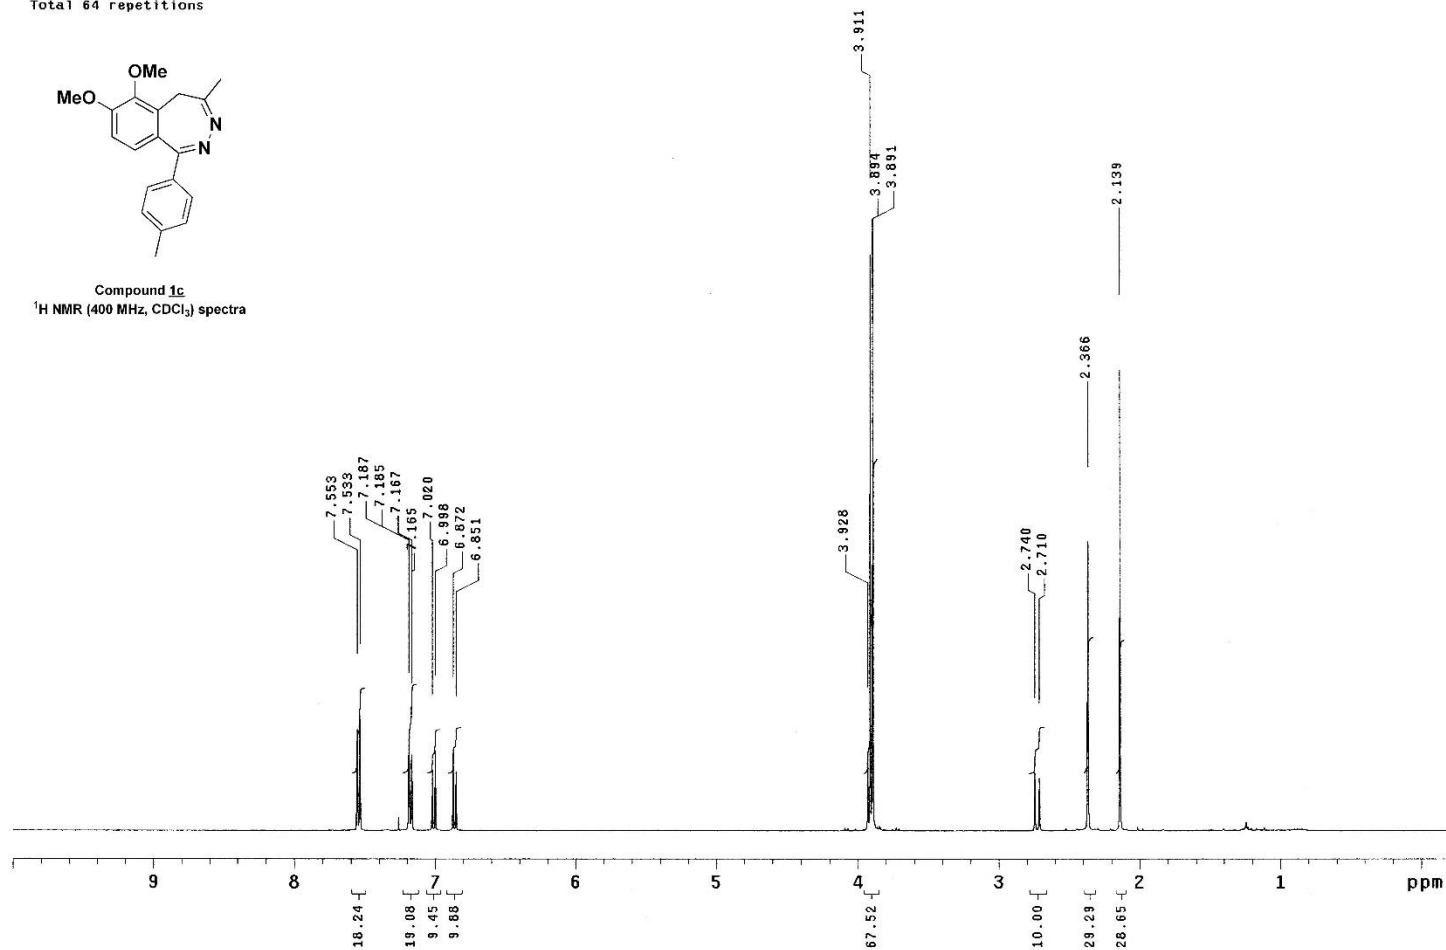

## Compound 1c

YL1040906

Pulse Sequence: s2pul  
UNITYplus-400 "unity400"  
Date: Sep 8 2015  
Solvent: CDCl<sub>3</sub>  
Ambient temperature  
Total 64 repetitions



Compound 1c

<sup>1</sup>H NMR (400 MHz, CDCl<sub>3</sub>) spectra

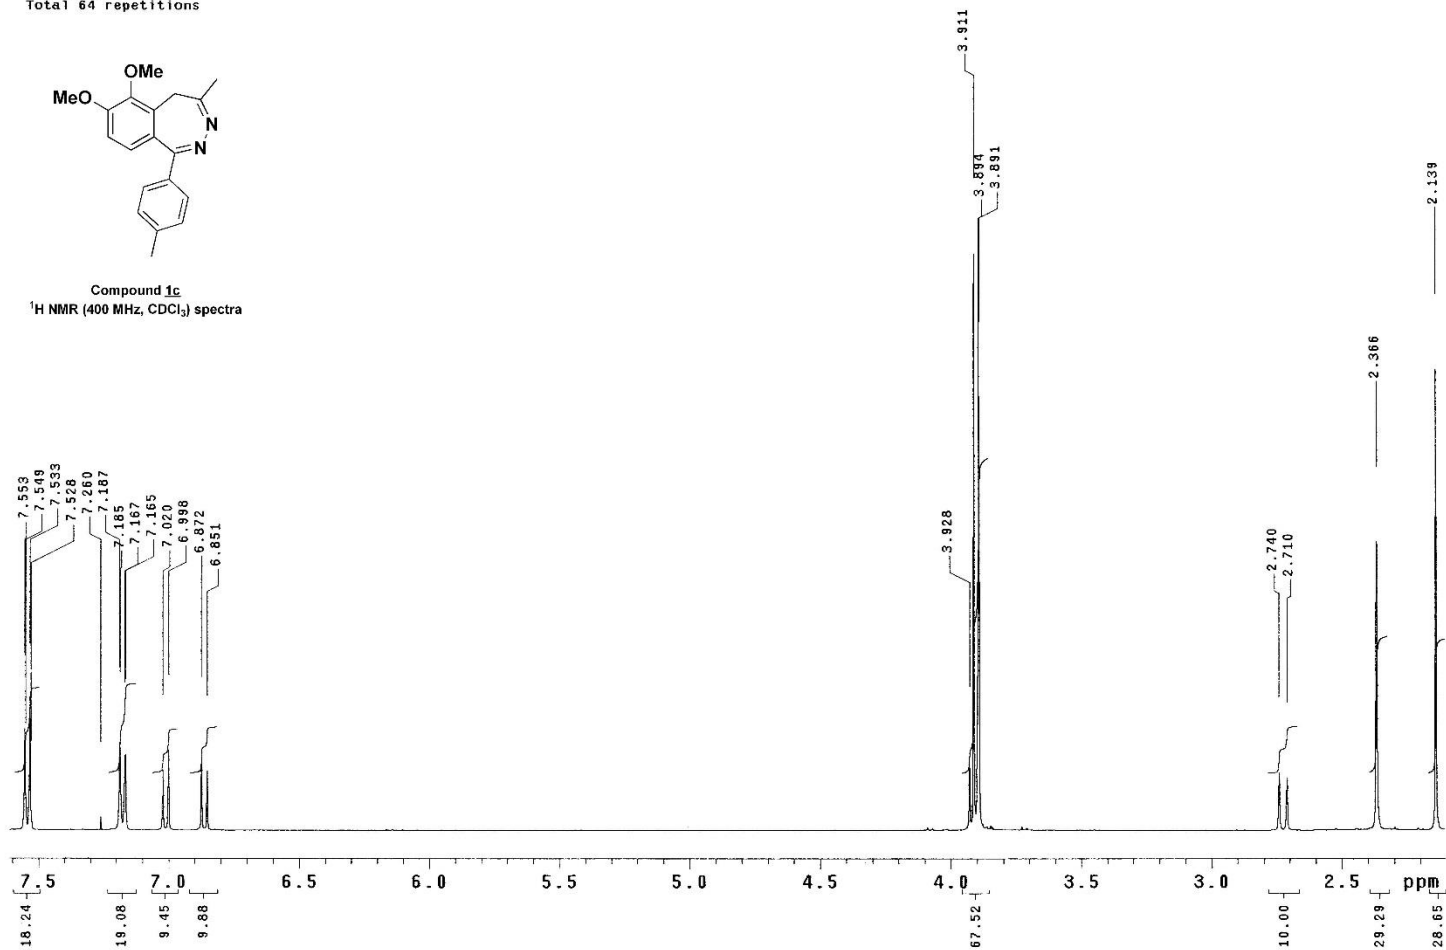

## Compound 1c

YL1040906

Pulse Sequence: s2pu1  
UNITYplus-400 "unity400"  
Date: Sep 8 2015  
Solvent: CDCl<sub>3</sub>  
Ambient temperature  
Total 320 repetitions

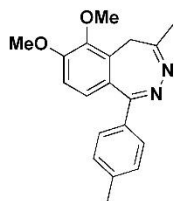

Compound 1c  
<sup>13</sup>C NMR (100 MHz, CDCl<sub>3</sub>) spectra

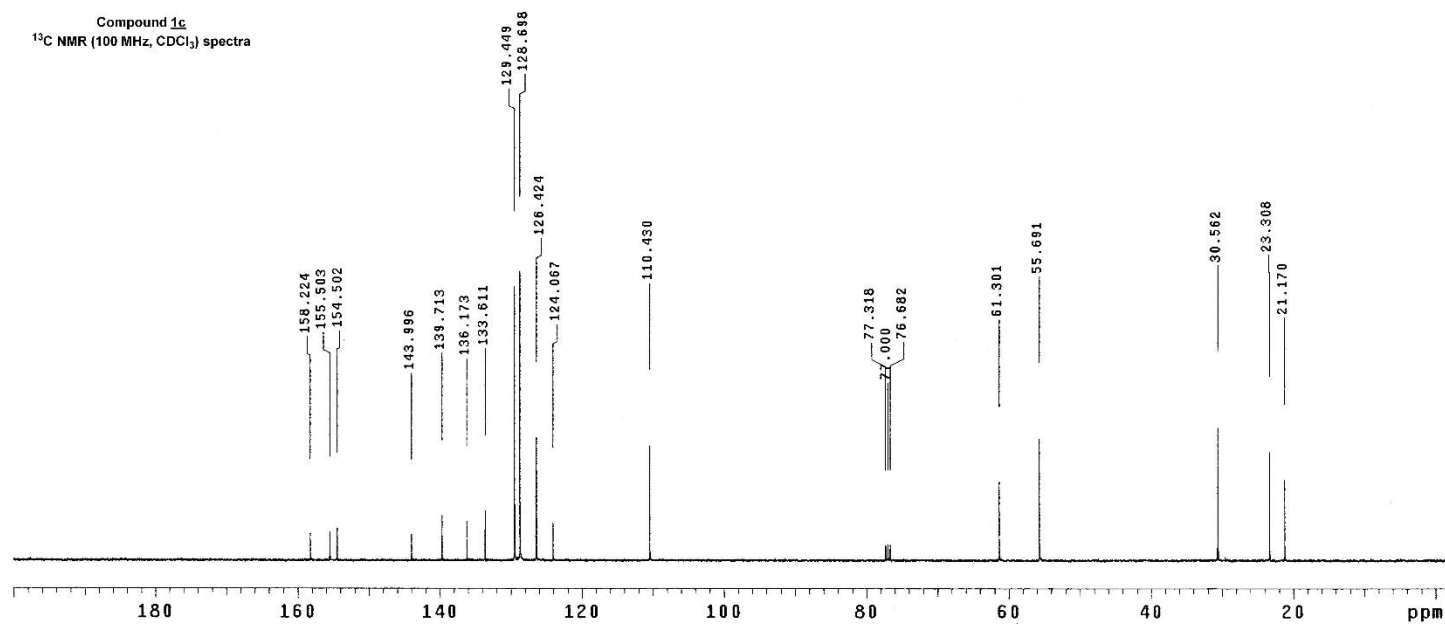

## Compound 1d

YL1040717

Pulse Sequence: s2pu1  
UNITYplus-400 "unity400"  
Date: Jul 22 2015  
Solvent: CDCl<sub>3</sub>  
Ambient temperature  
Total 64 repetitions

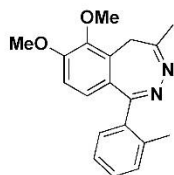

Compound 1d  
<sup>1</sup>H NMR (400 MHz, CDCl<sub>3</sub>) spectra

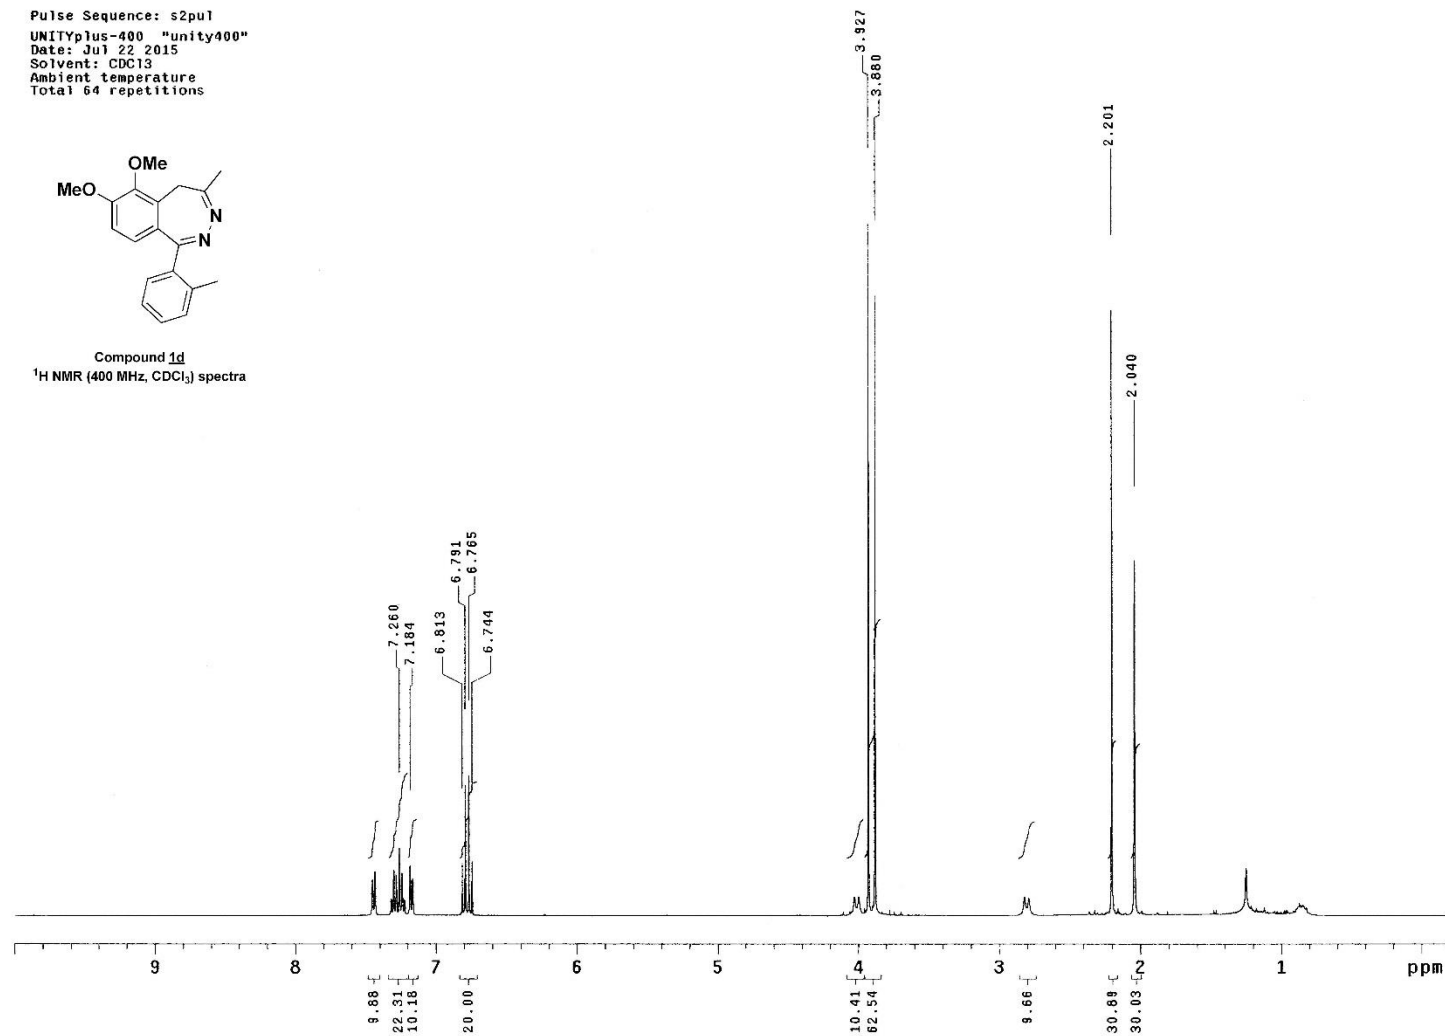



## Compound 1d

YL1040717

Pulse Sequence: s2pu1

UNITYplus-400 "unity400"

Date: Jul 22 2015

Solvent: CDCl<sub>3</sub>

Ambient temperature

Total 64 repetitions

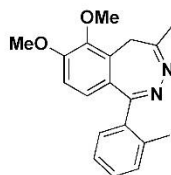

Compound 1d

<sup>1</sup>H NMR (400 MHz, CDCl<sub>3</sub>) spectra

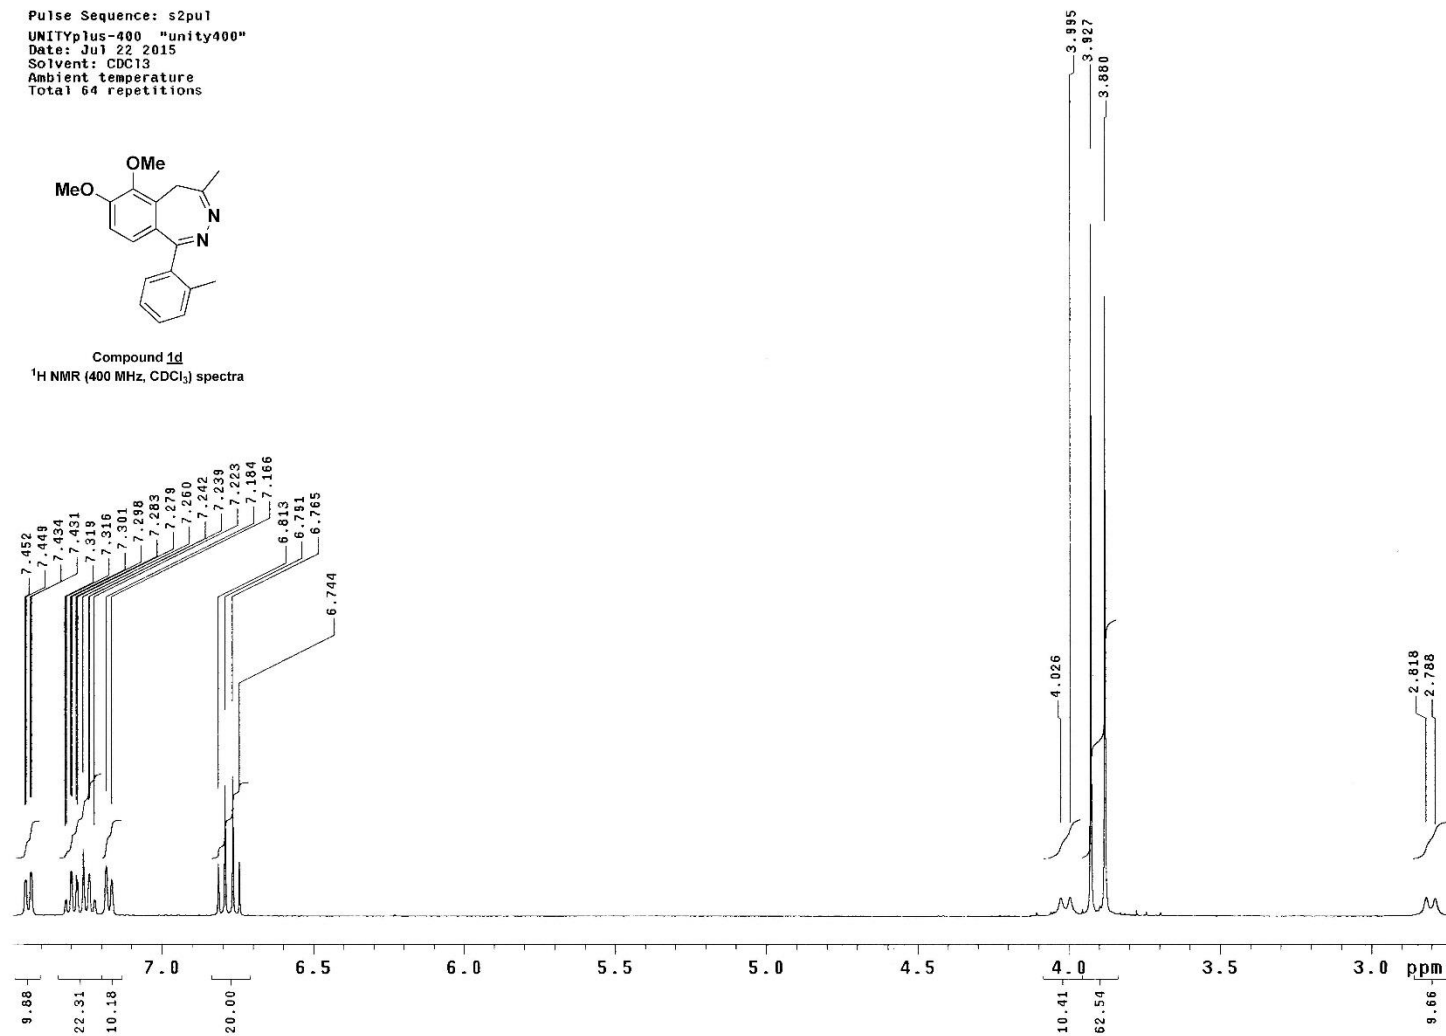

## Compound 1d

YL1040717

Pulse Sequence: s2pul

UNITYplus-400 "unity400"

Date: Jul 22 2015

Solvent: CDCl<sub>3</sub>

Ambient temperature

Total 2080 repetitions

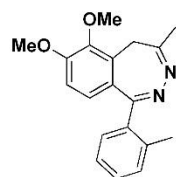

Compound 1d

<sup>13</sup>C NMR (100 MHz, CDCl<sub>3</sub>) spectra

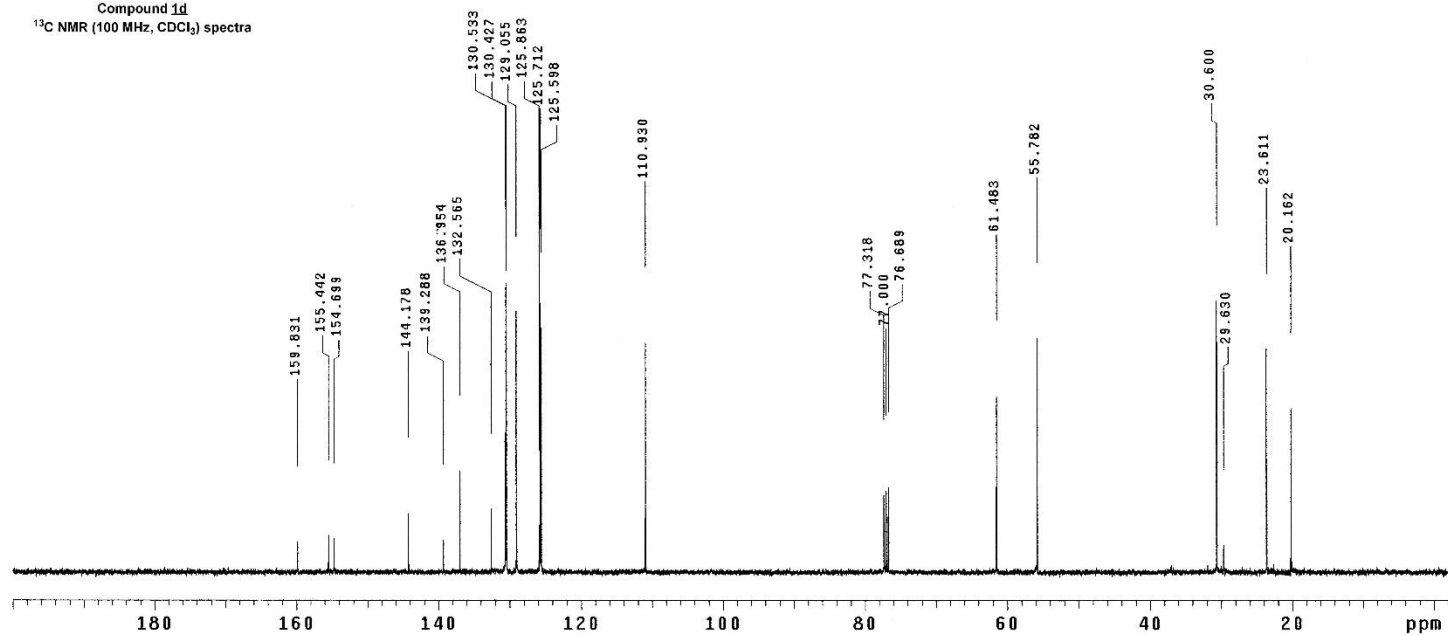

## Compound 1d

YL1040717

Pulse Sequence: s2pul

UNITYplus-400 "unity400"

Date: Jul 22 2015

Solvent: CDCl<sub>3</sub>

Ambient temperature

Total 2080 repetitions



Compound 1d

<sup>13</sup>C NMR (100 MHz, CDCl<sub>3</sub>) spectra

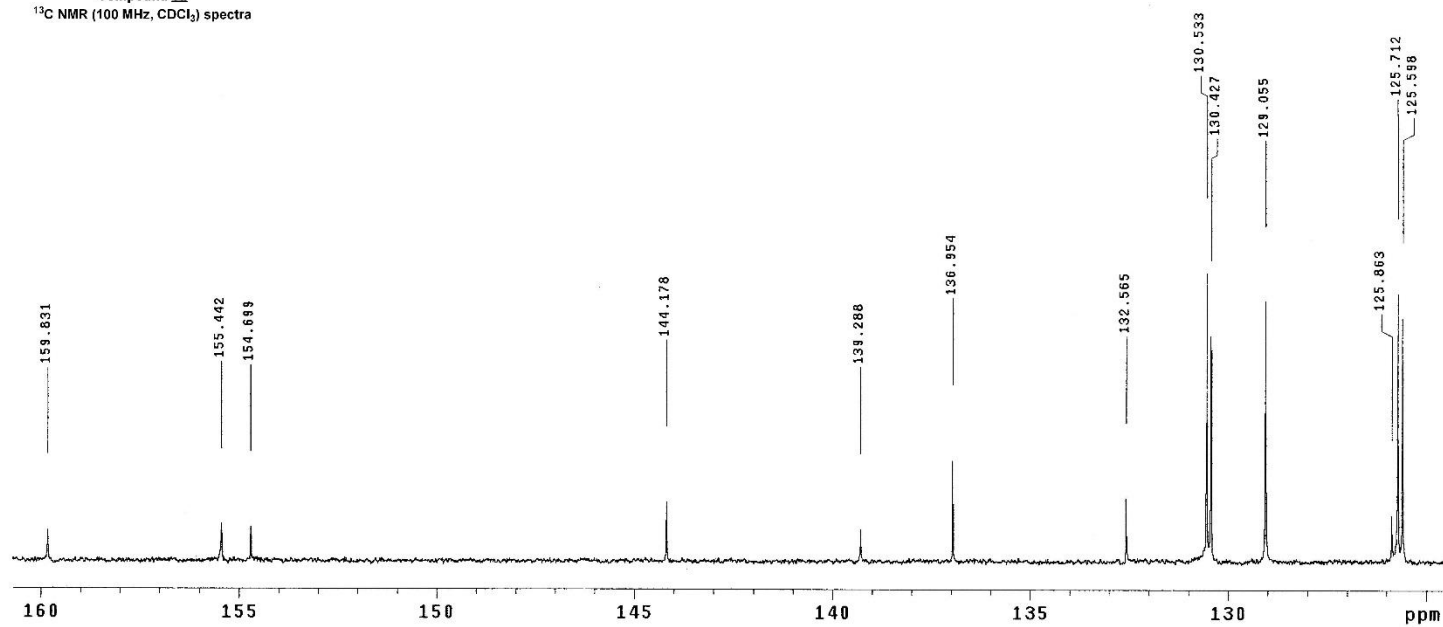

## Compound 1e

YL1040723

Pulse Sequence: s2pul  
UNITYplus-400 "unity400"  
Date: Jul 30 2015  
Solvent: CDCl<sub>3</sub>  
Ambient temperature  
Total 64 repetitions

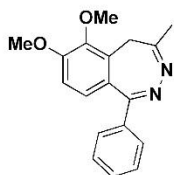

Compound **1e**  
<sup>1</sup>H NMR (400 MHz, CDCl<sub>3</sub>) spectra

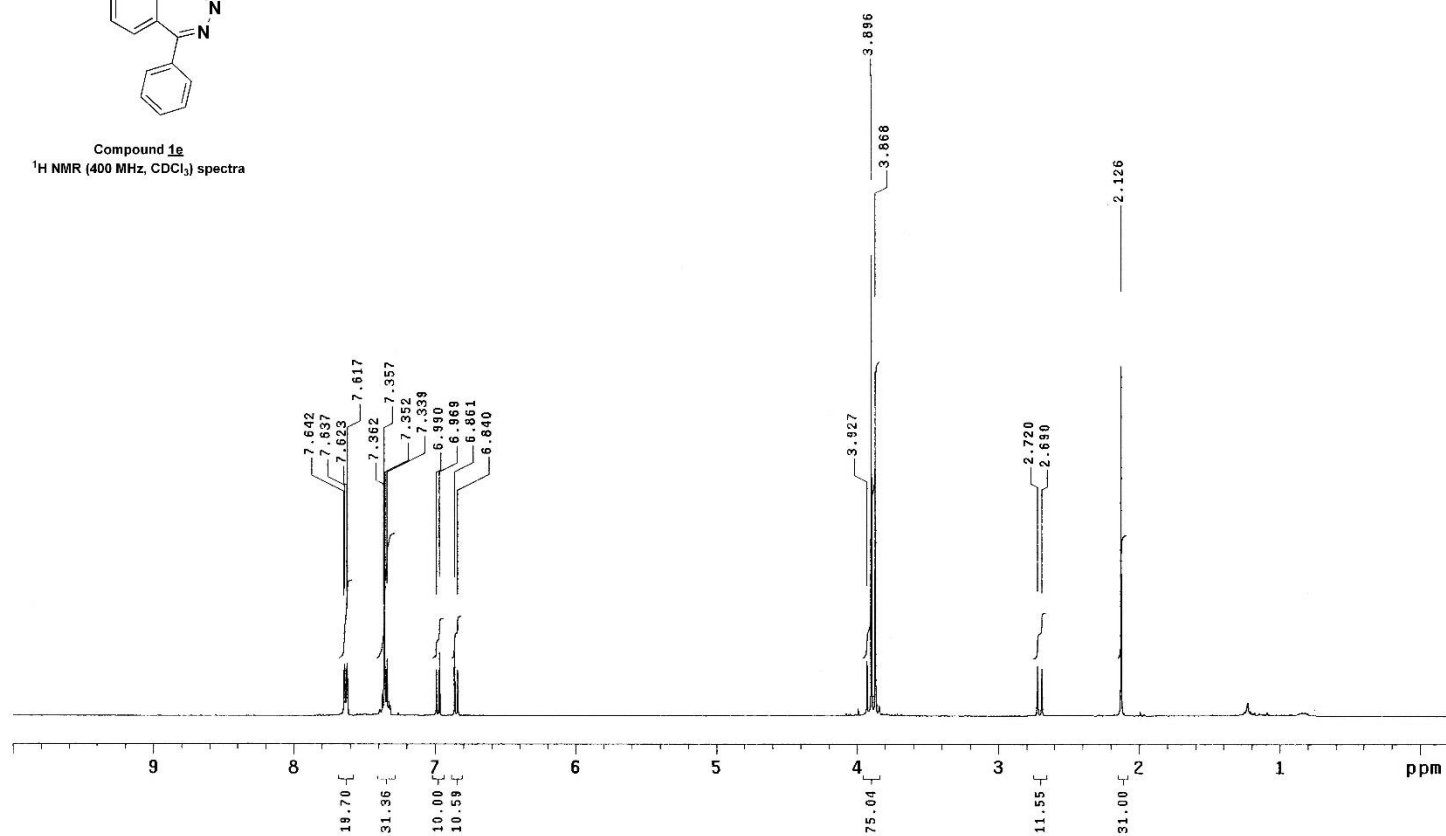

## Compound 1e

YL1040723

Pulse Sequence: s2pul

UNITYplus-400 "unity400"

Date: Jul 30 2015

Solvent: CDCl<sub>3</sub>

Ambient temperature

Total 64 repetitions

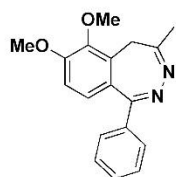

Compound **1e**

<sup>1</sup>H NMR (400 MHz, CDCl<sub>3</sub>) spectra

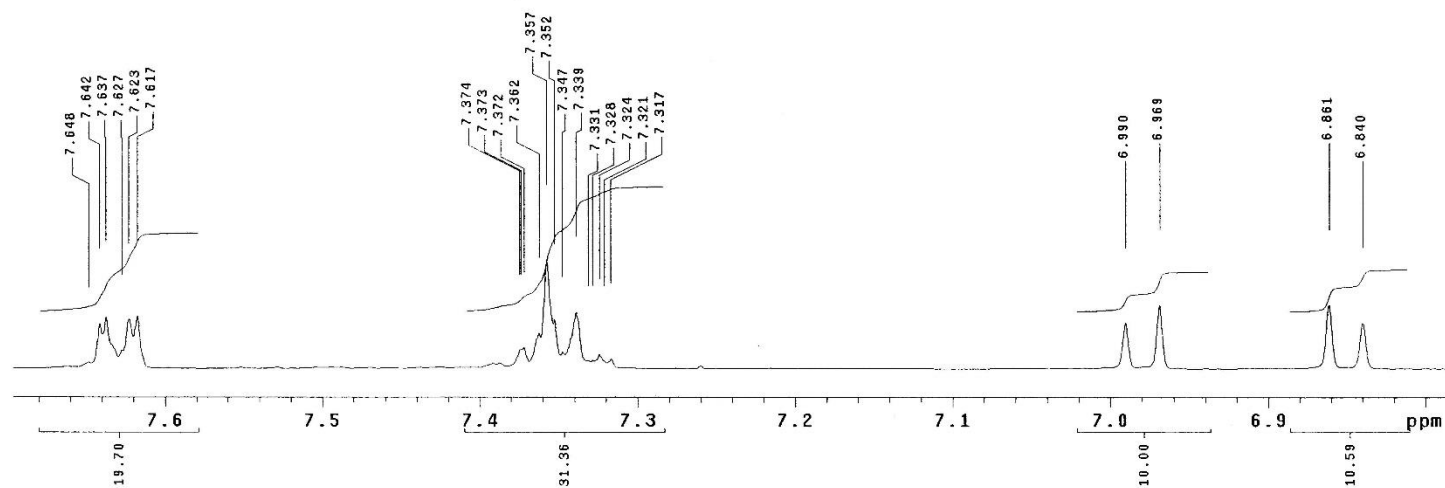

## Compound 1e

YL1040723

Pulse Sequence: s2pu1

UNITYplus-400 "unity400"

Date: Jul 30 2015

Solvent: CDCl<sub>3</sub>

Ambient temperature

Total 624 repetitions

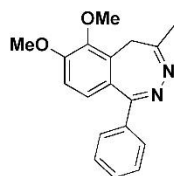

Compound 1e

<sup>13</sup>C NMR (100 MHz, CDCl<sub>3</sub>) spectra

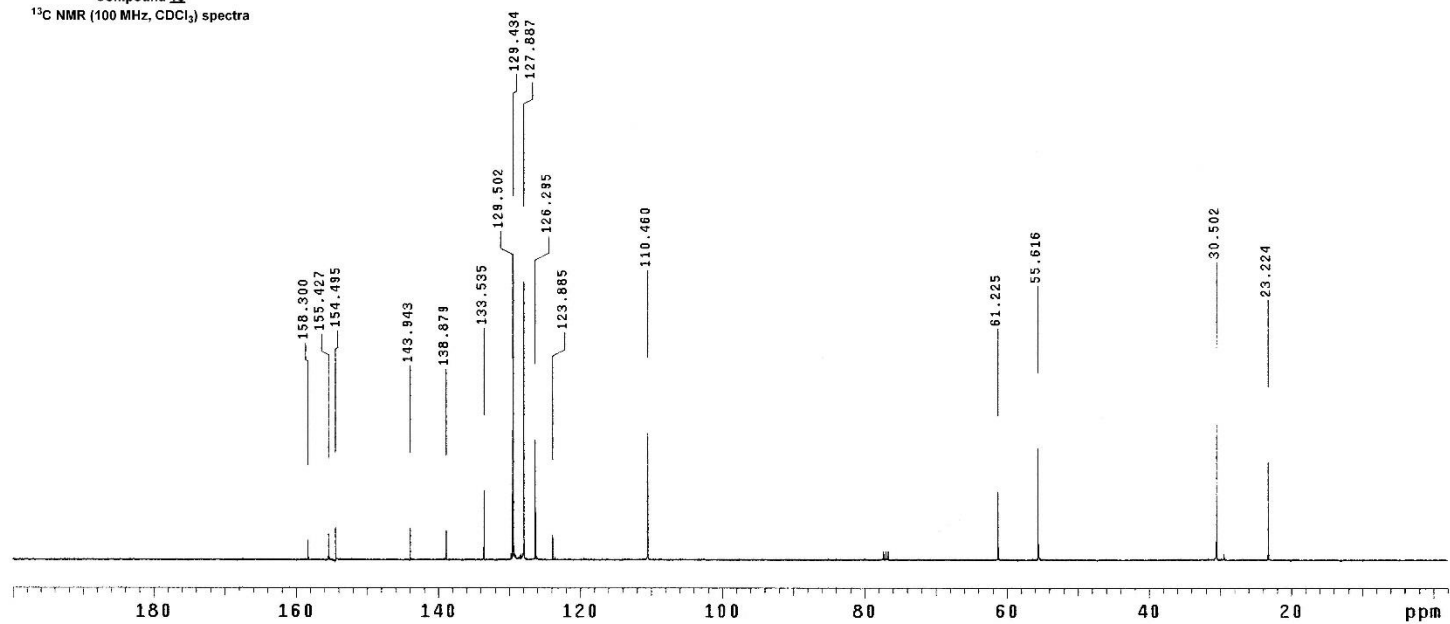

## Compound 1f

YL1040729

Pulse Sequence: s2pul

UNITYplus-400 "unity400"

Date: Aug 5 2015

Solvent: CDCl<sub>3</sub>

Ambient temperature

Total 64 repetitions

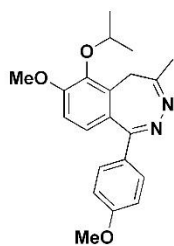

Compound 1f

<sup>1</sup>H NMR (400 MHz, CDCl<sub>3</sub>) spectra

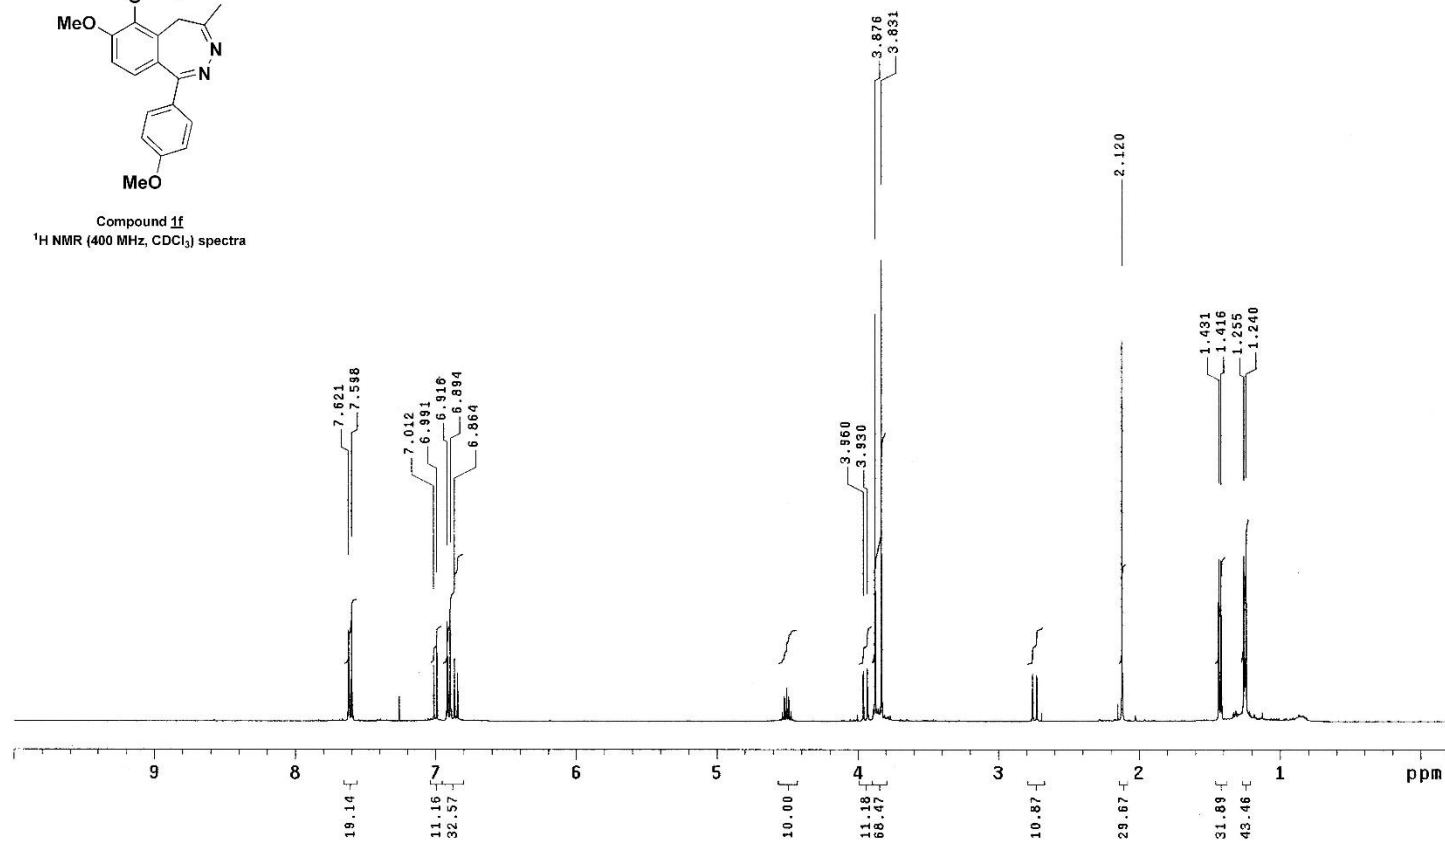

## Compound 1f

YL1040729

Pulse Sequence: s2pul  
UNITYplus-400 "unity400"  
Date: Aug 5 2015  
Solvent: CDCl<sub>3</sub>  
Ambient temperature  
Total 64 repetitions

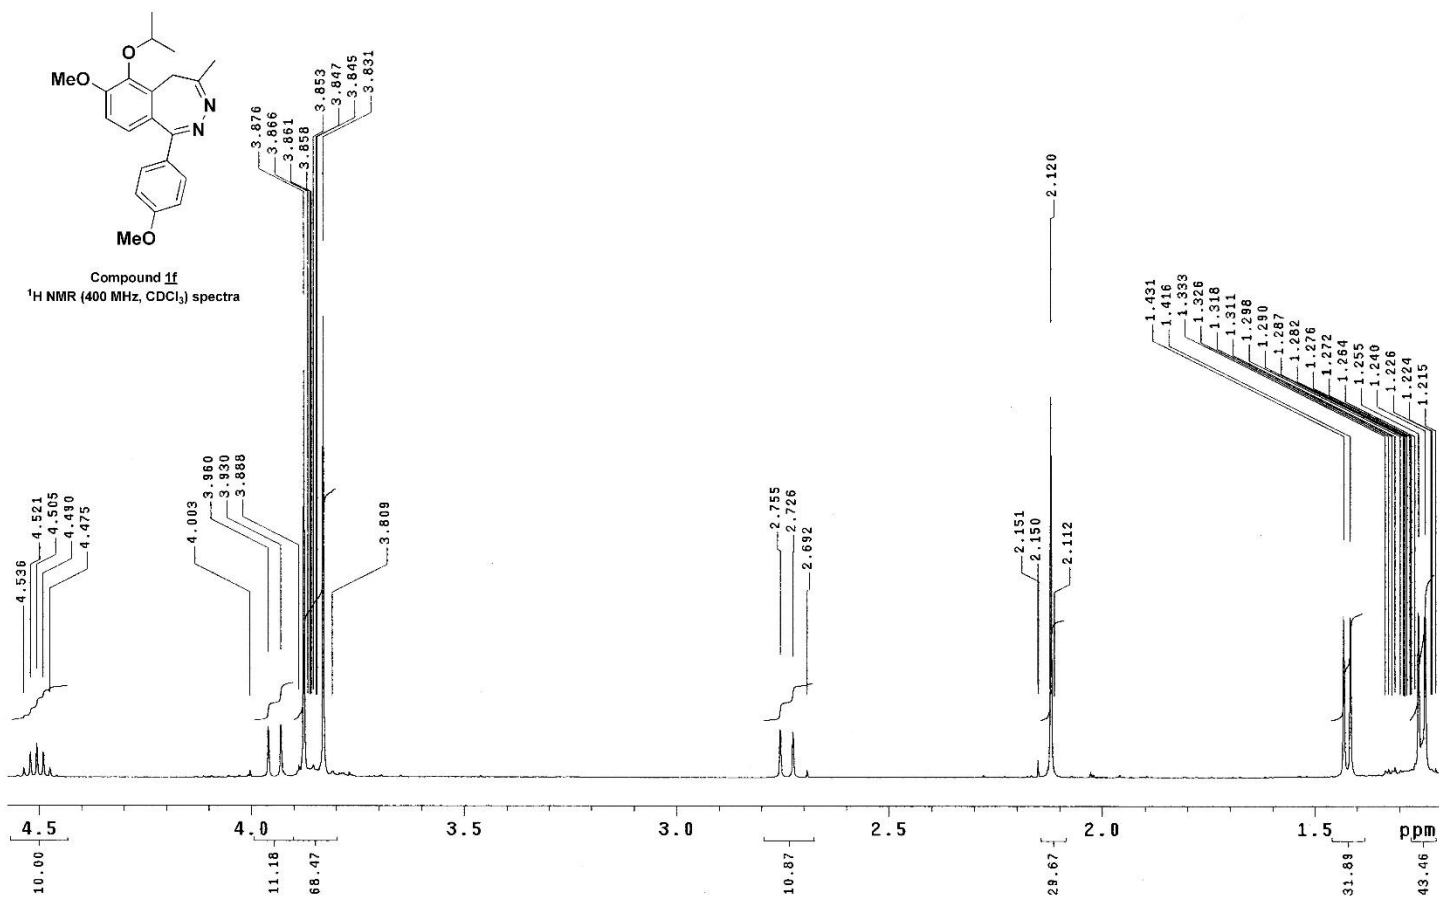



## Compound 1f

YL1040729

Pulse Sequence: s2pu1

UNITYplus-400 "unity400"

Date: Aug 5 2015

Solvent: CDCl<sub>3</sub>

Ambient temperature

Total 64 repetitions

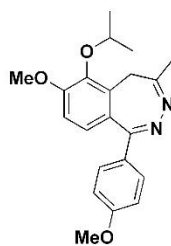

Compound 1f

<sup>1</sup>H NMR (400 MHz, CDCl<sub>3</sub>) spectra

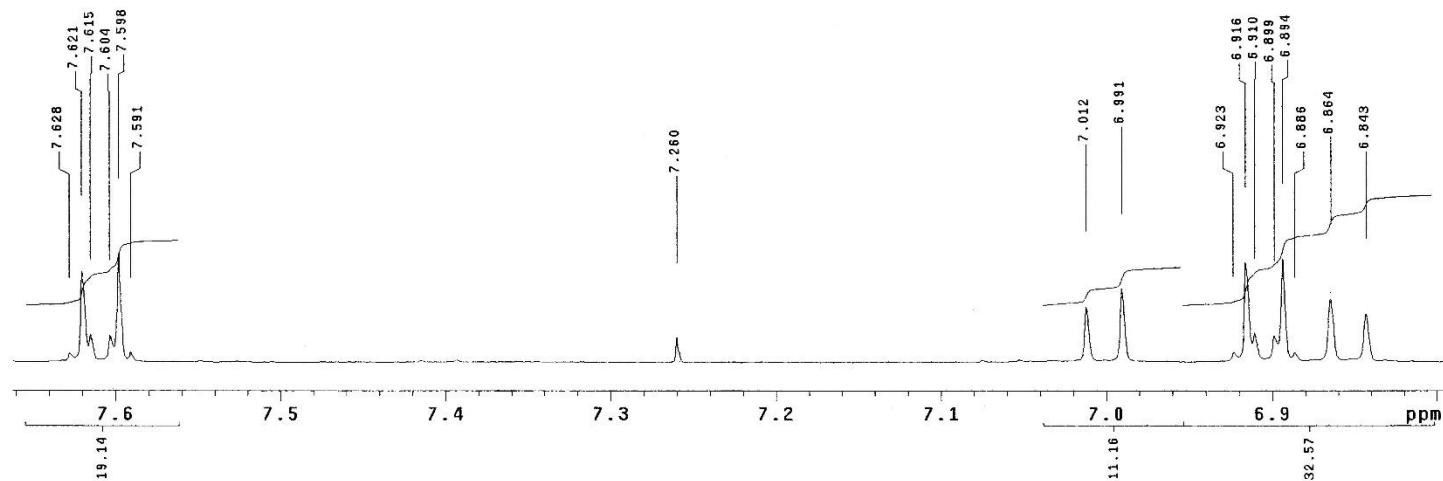

## Compound 1f

YL1040729

Pulse Sequence: s2pul  
UNITYplus-400 "unity400"  
Date: Aug 5 2015  
Solvent: CDCl<sub>3</sub>  
Ambient temperature  
Total 640 repetitions

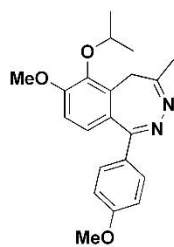

Compound 1f  
<sup>13</sup>C NMR (100 MHz, CDCl<sub>3</sub>) spectra

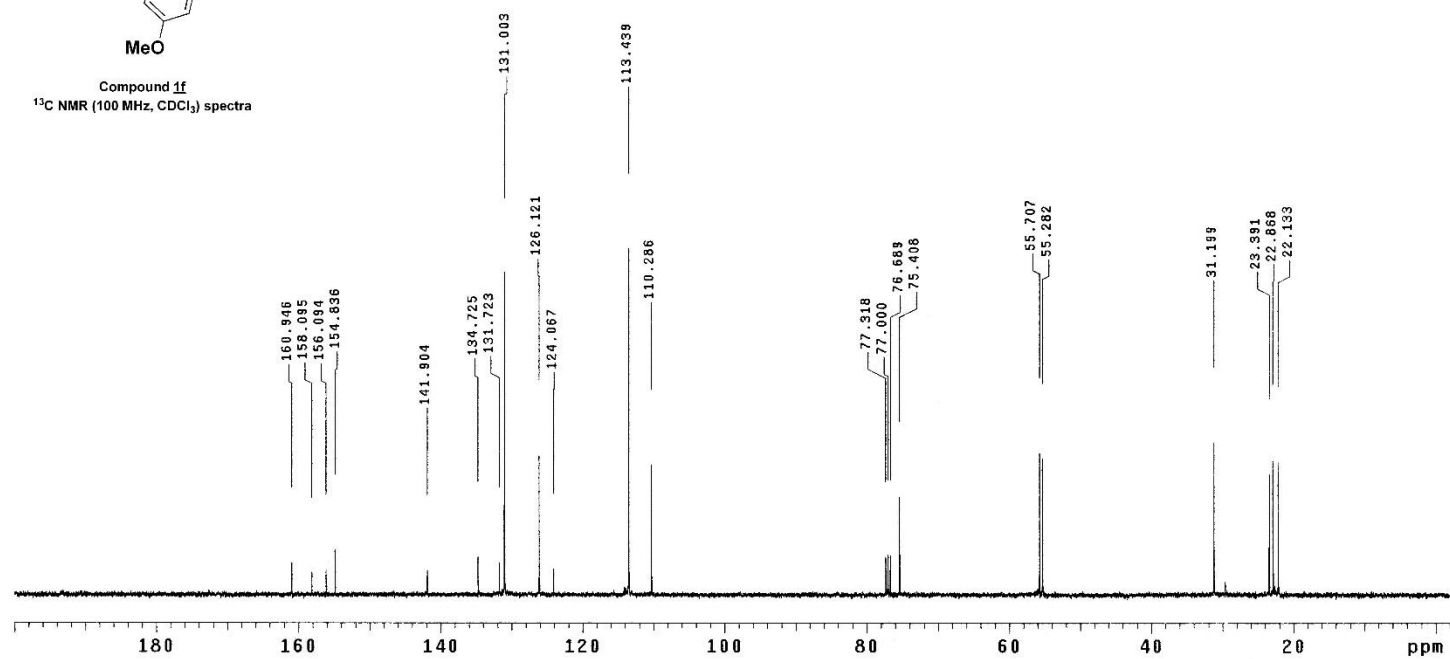

## Compound 1g

YL1040821

Pulse Sequence: s2pul  
UNITYplus-400 "unity400"  
Date: Aug 24 2015  
Solvent: CDCl<sub>3</sub>  
Ambient temperature  
Total 64 repetitions

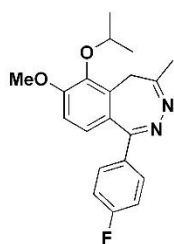

Compound 1g  
<sup>1</sup>H NMR (400 MHz, CDCl<sub>3</sub>) spectra

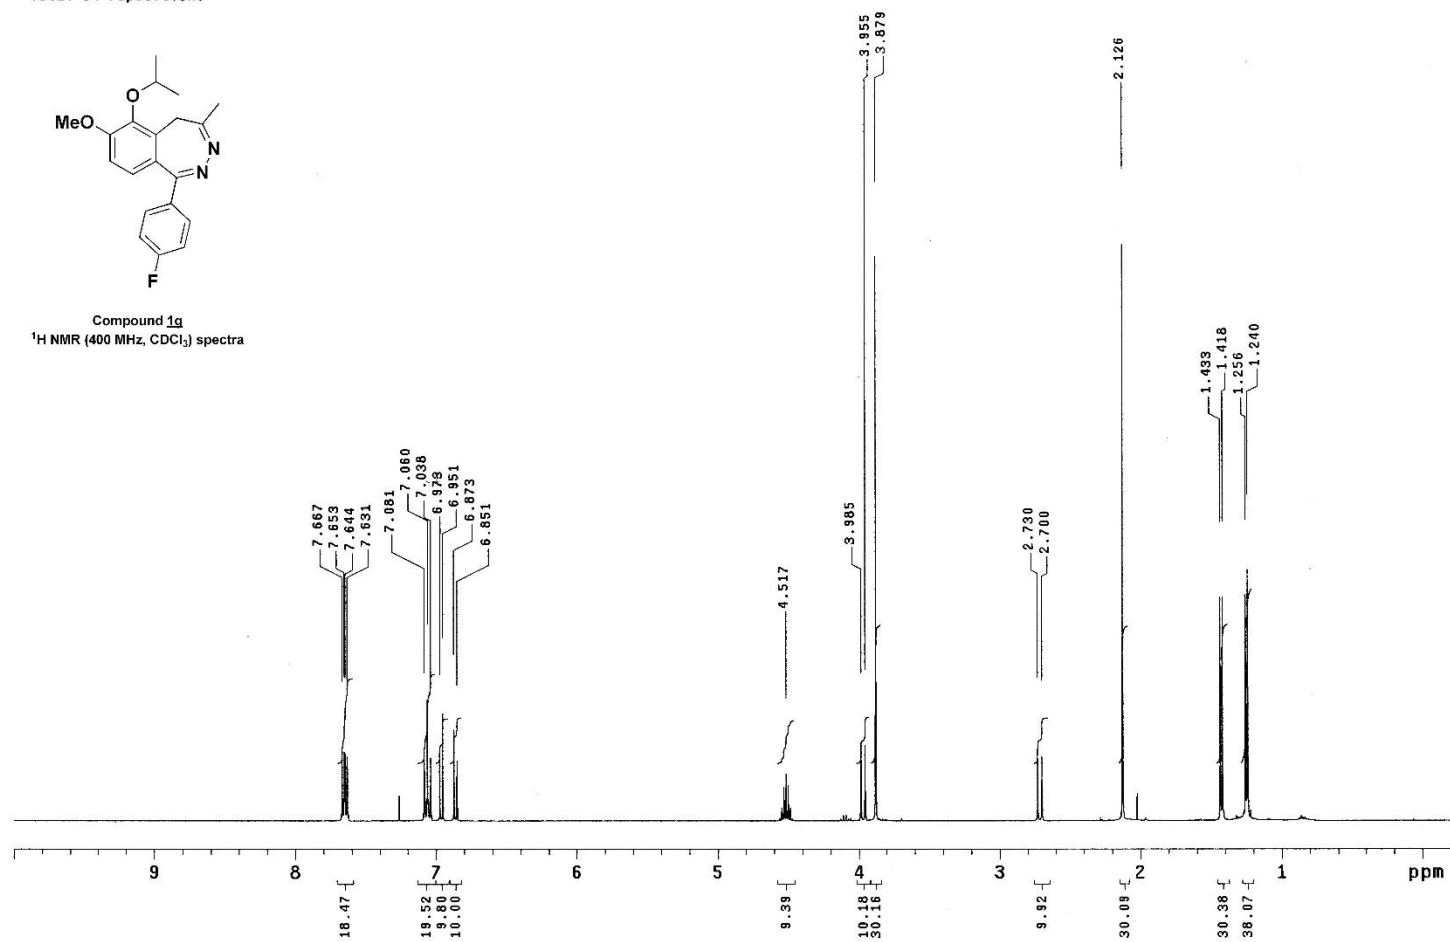

## Compound 1g

YL1040821

Pulse Sequence: s2pul  
UNITYplus-400 "unity400"  
Date: Aug 24 2015  
Solvent: CDCl<sub>3</sub>  
Ambient temperature  
Total 64 repetitions



Compound 1g  
<sup>1</sup>H NMR (400 MHz, CDCl<sub>3</sub>) spectra

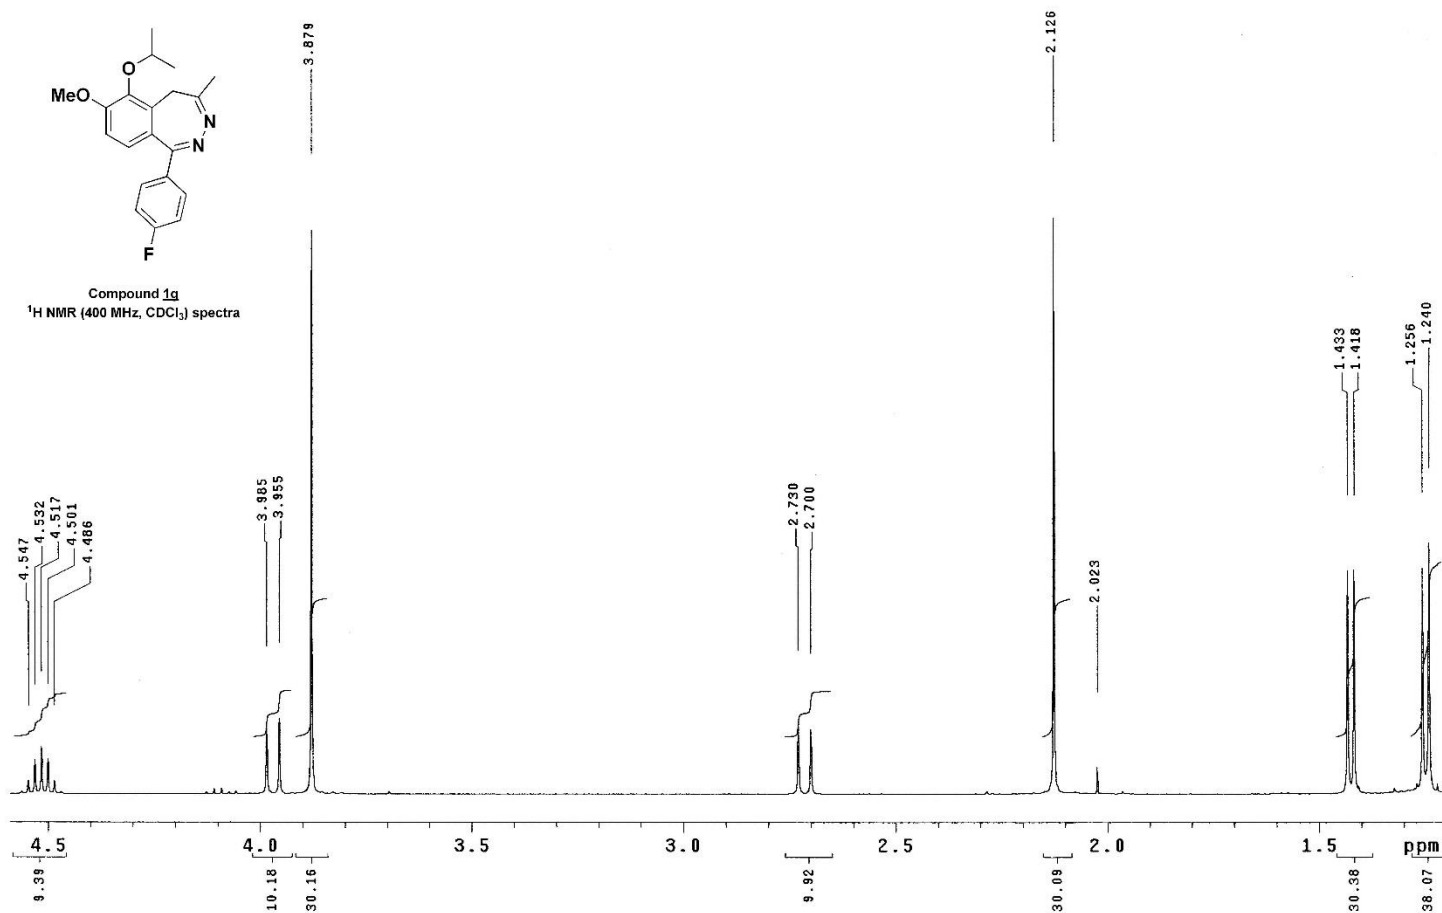

## Compound 1g

YL1040821

Pulse Sequence: s2pul  
UNITYplus-400 "unity400"  
Date: Aug 24 2015  
Solvent: CDCl<sub>3</sub>  
Ambient temperature  
Total 64 repetitions

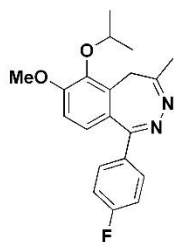

Compound 1g  
<sup>1</sup>H NMR (400 MHz, CDCl<sub>3</sub>) spectra

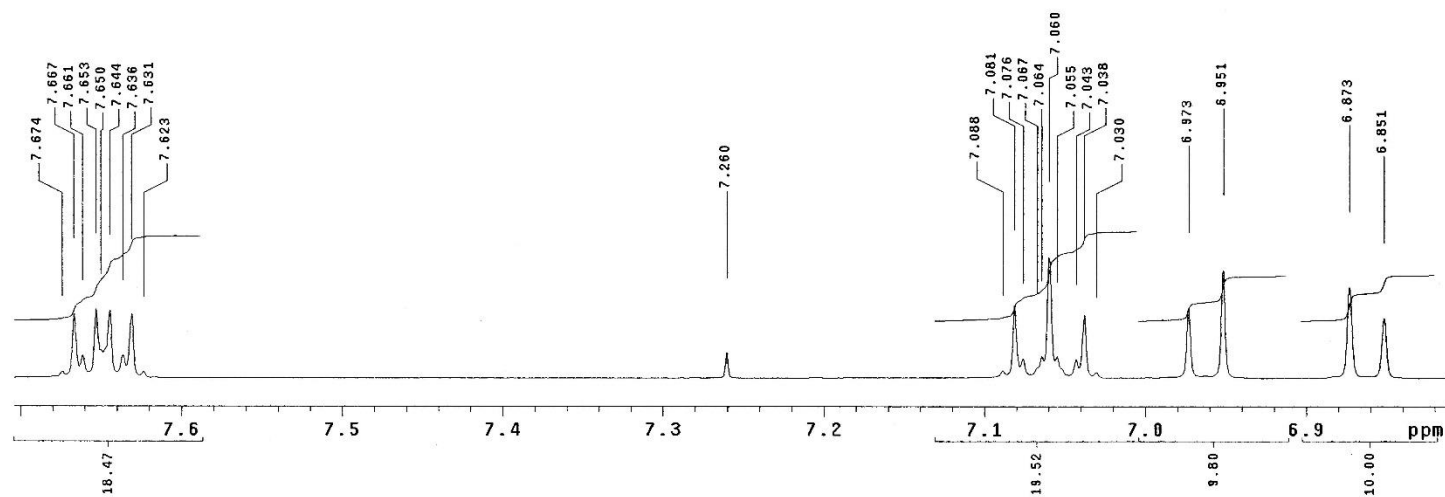

## Compound 1g

YL1040821

Pulse Sequence: s2pul  
UNITYplus-400 "unity400"  
Date: Aug 24 2015  
Solvent: CDCl<sub>3</sub>  
Ambient temperature  
Total 720 repetitions

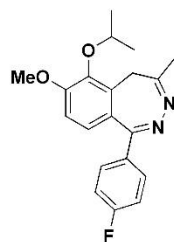

Compound 1g

<sup>13</sup>C NMR (100 MHz, CDCl<sub>3</sub>) spectra

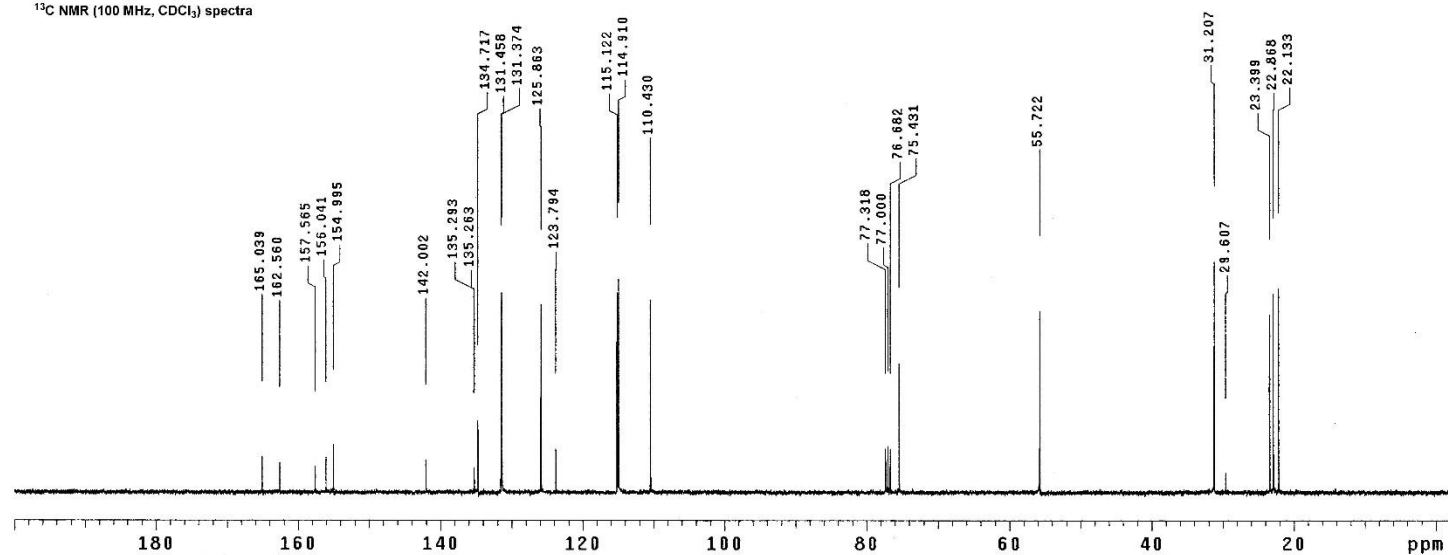

## Compound 1h

YL1040831

Pulse Sequence: s2pul  
UNITYplus-400 "unity400"  
Date: Sep 2 2015  
Solvent: CDCl<sub>3</sub>  
Ambient temperature  
Total 64 repetitions

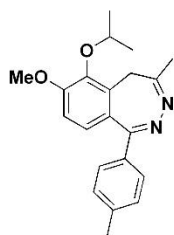

Compound 1h  
<sup>1</sup>H NMR (400 MHz, CDCl<sub>3</sub>) spectra

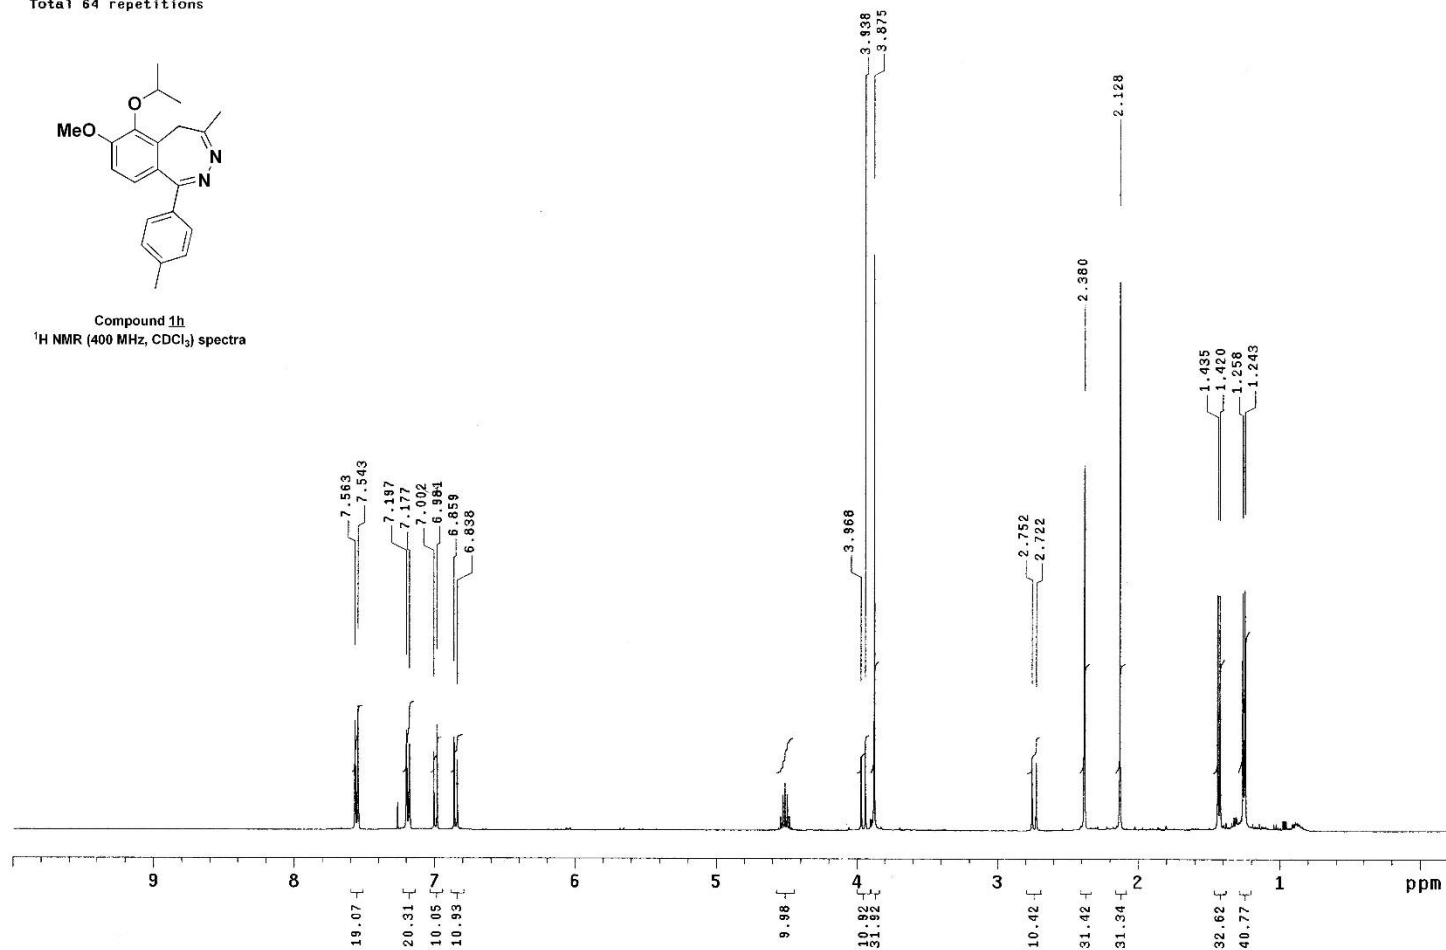

## Compound 1h

YL1040831

Pulse Sequence: s2pul

UNITYplus-400 "unity400"

Date: Sep 2 2015

Solvent: CDCl<sub>3</sub>

Ambient temperature

Total 64 repetitions

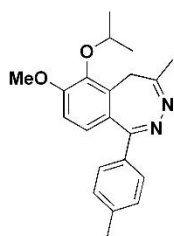

Compound 1h

<sup>1</sup>H NMR (400 MHz, CDCl<sub>3</sub>) spectra

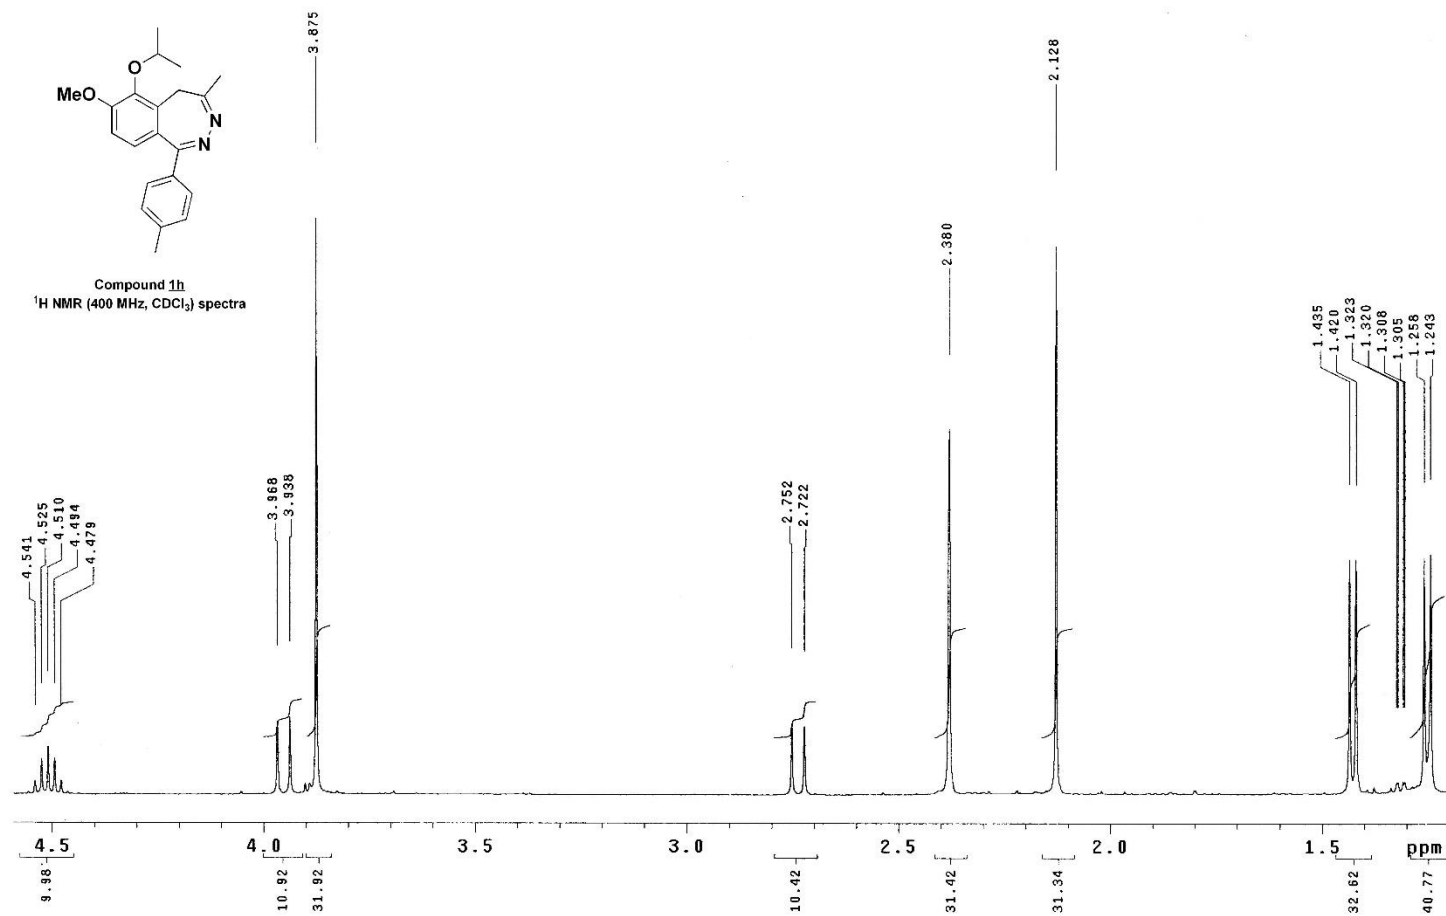



## Compound 1h

YL1040831

Pulse Sequence: s2pu1  
UNITYplus-400 "unity400"  
Date: Sep 2 2015  
Solvent: CDCl<sub>3</sub>  
Ambient temperature  
Total 1616 repetitions

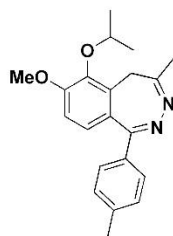

Compound 1h

<sup>13</sup>C NMR (100 MHz, CDCl<sub>3</sub>) spectra

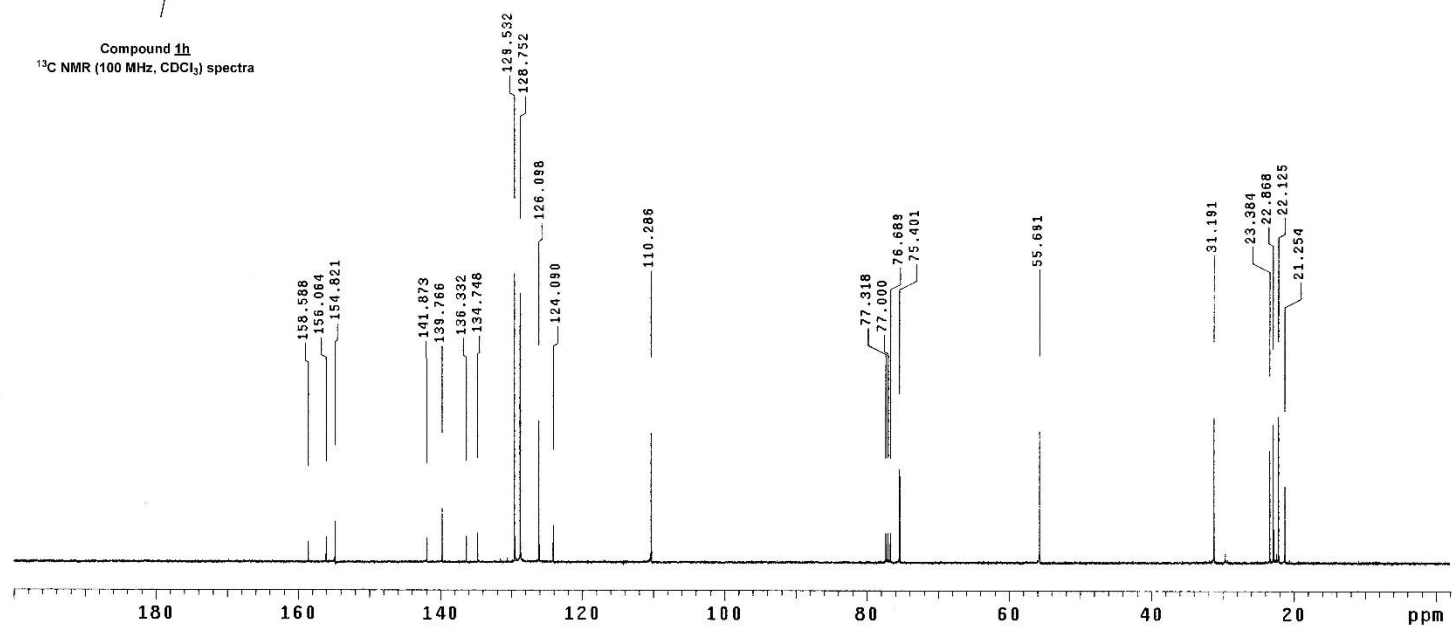

# Compound 1i

YL1040825

Pulse Sequence: s2pul

UNITYplus-400 "unity400"

Date: Aug 26 2015

Solvent: CDCl<sub>3</sub>

Ambient temperature

Total 48 repetitions

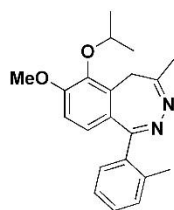

Compound 1i

<sup>1</sup>H NMR (400 MHz, CDCl<sub>3</sub>) spectra

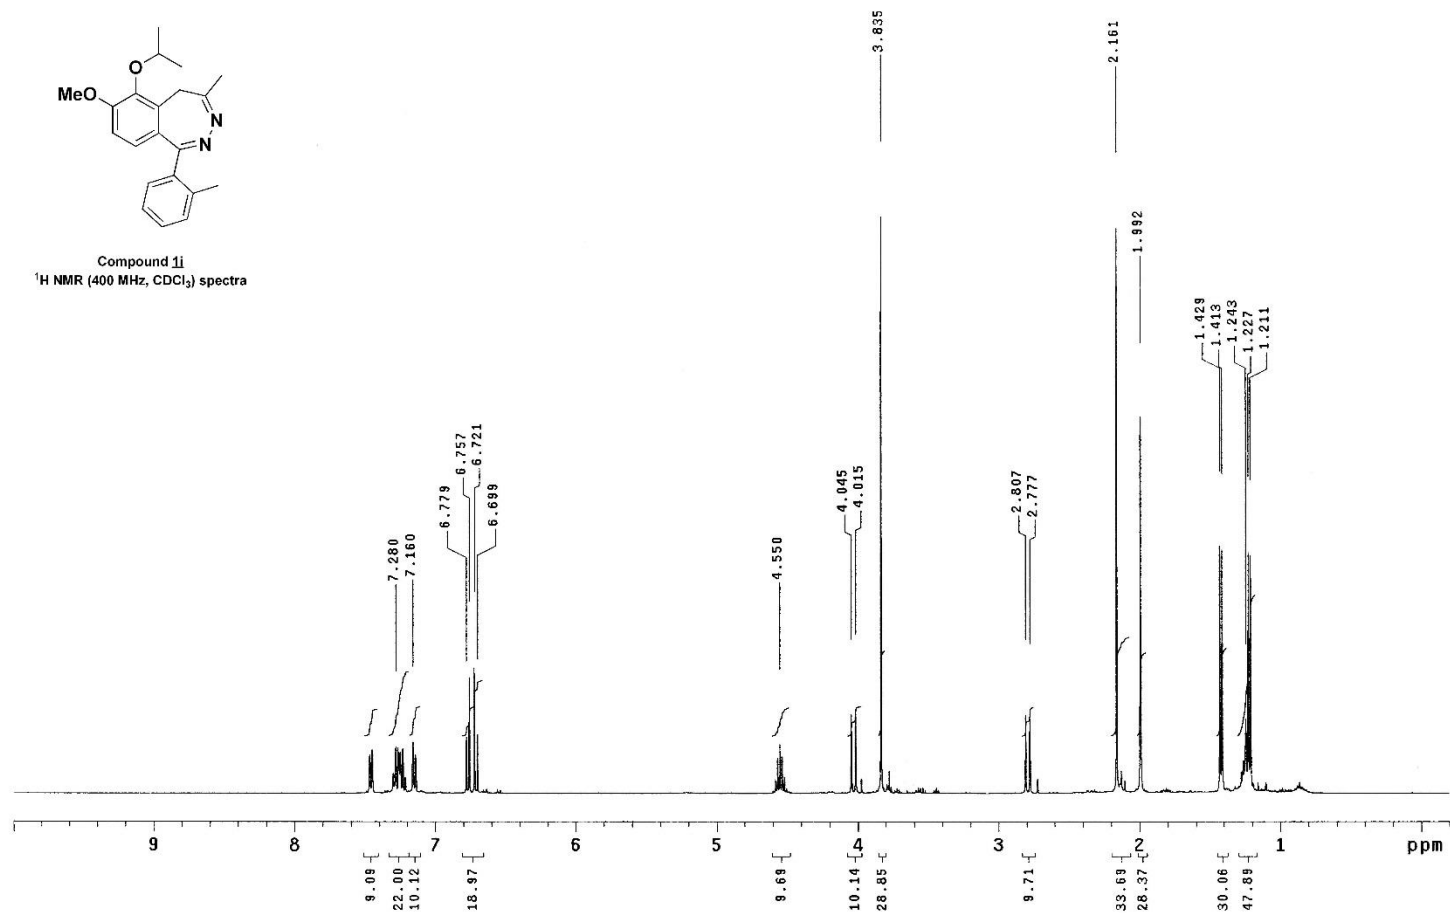

## Compound 1i

YL1040825

Pulse Sequence: s2pu1

UNITYplus-400 "unity400"

Date: Aug 26 2015

Solvent: CDCl<sub>3</sub>

Ambient temperature

Total 48 repetitions



Compound 1i

<sup>1</sup>H NMR (400 MHz, CDCl<sub>3</sub>) spectra

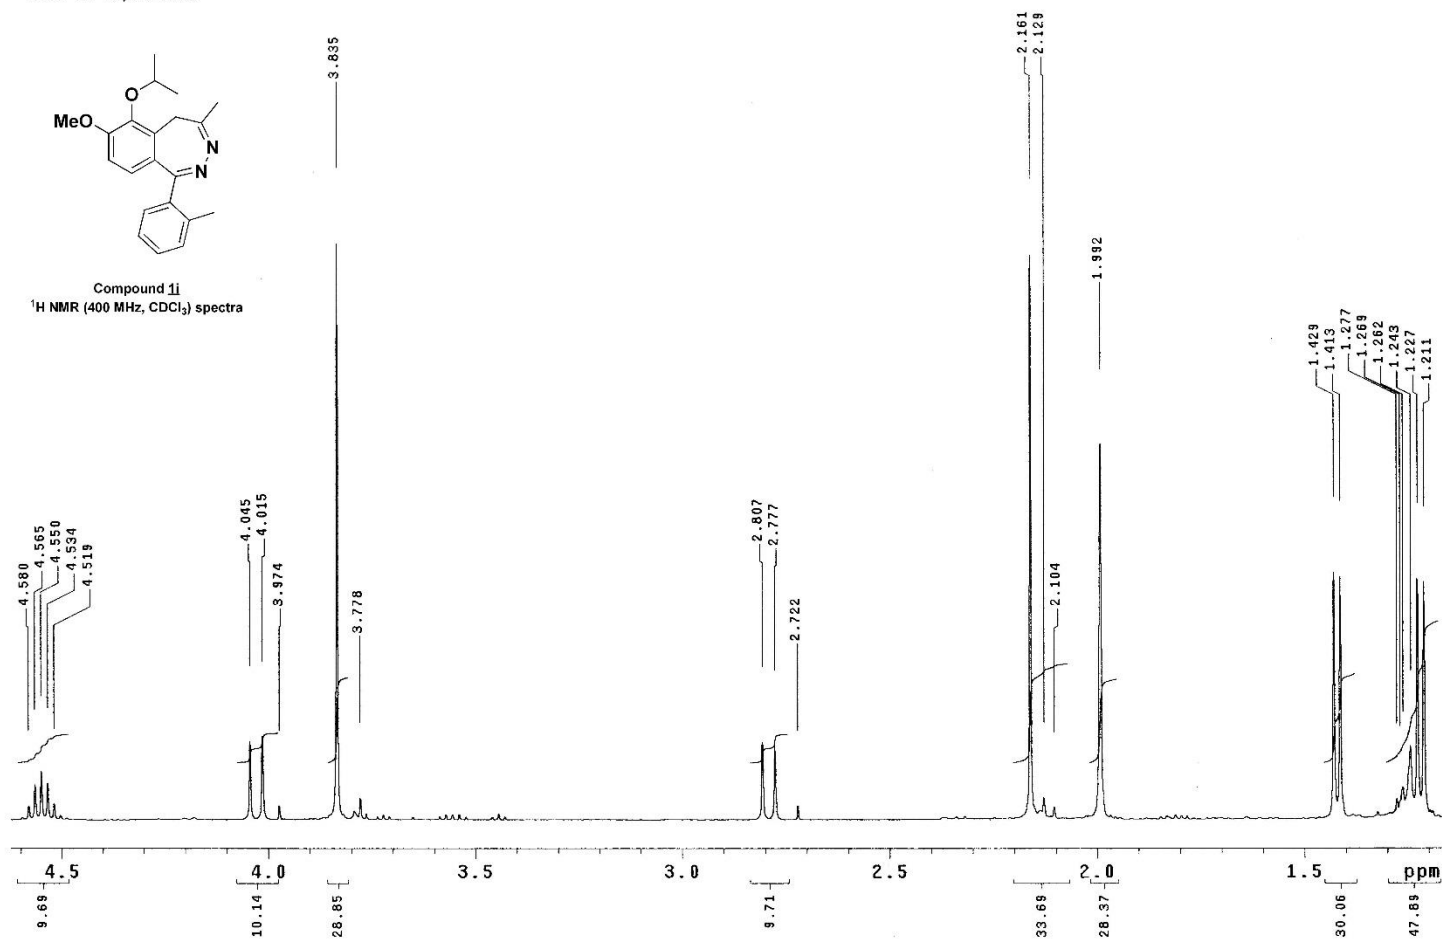

## Compound 1i

YL1040825

Pulse Sequence: s2pu1

UNITYplus-400 "unity400"

Date: Aug 26 2015

Solvent: CDCl<sub>3</sub>

Ambient temperature

Total 48 repetitions



Compound 1i

<sup>1</sup>H NMR (400 MHz, CDCl<sub>3</sub>) spectra

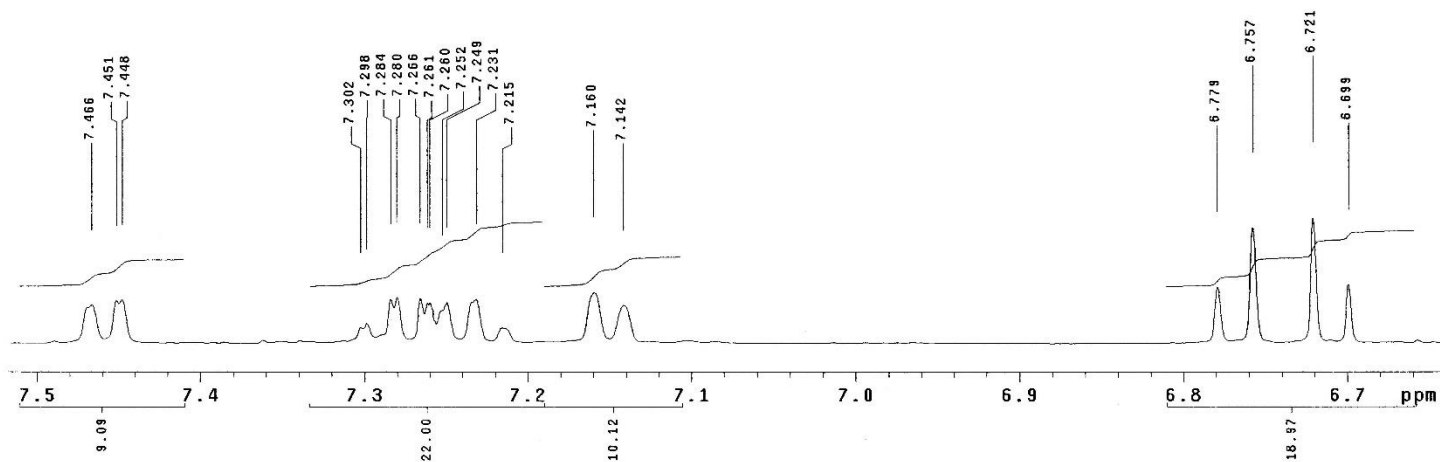

## Compound 1i

YL1040825

Pulse Sequence: s2pul  
UNITYplus-400 "unity400"  
Date: Aug 26 2015  
Solvent: CDCl<sub>3</sub>  
Ambient temperature  
Total 400 repetitions

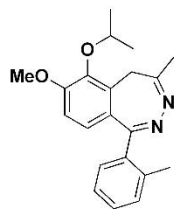

Compound 1i

<sup>13</sup>C NMR (100 MHz, CDCl<sub>3</sub>) spectra

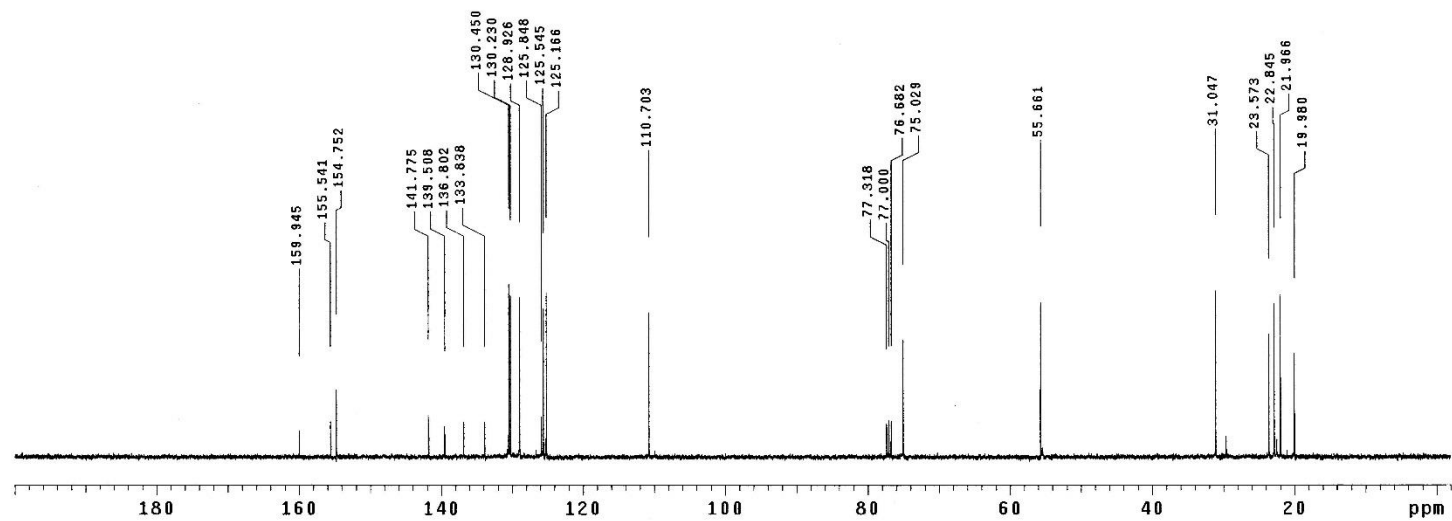

## Compound 1i

YL1040825

Pulse Sequence: s2pul

UNITYplus-400 "unity400"

Date: Aug 26 2015

Solvent: CDCl<sub>3</sub>

Ambient temperature

Total 400 repetitions

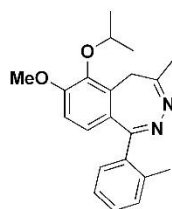

Compound 1i

<sup>13</sup>C NMR (100 MHz, CDCl<sub>3</sub>) spectra

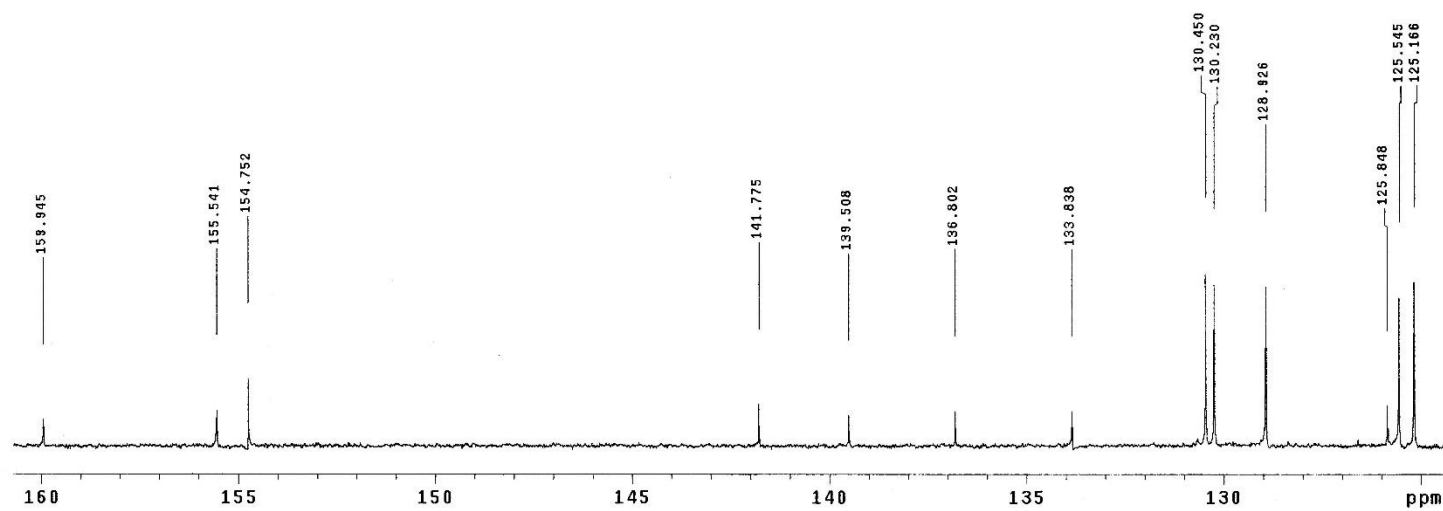

## Compound 1j

YL1040827

Pulse Sequence: s2pul  
UNITYplus-400 "unity400"  
Date: Aug 31 2015  
Solvent: CDCl<sub>3</sub>  
Ambient temperature  
Total 64 repetitions

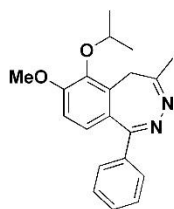

Compound 1j

<sup>1</sup>H NMR (400 MHz, CDCl<sub>3</sub>) spectra

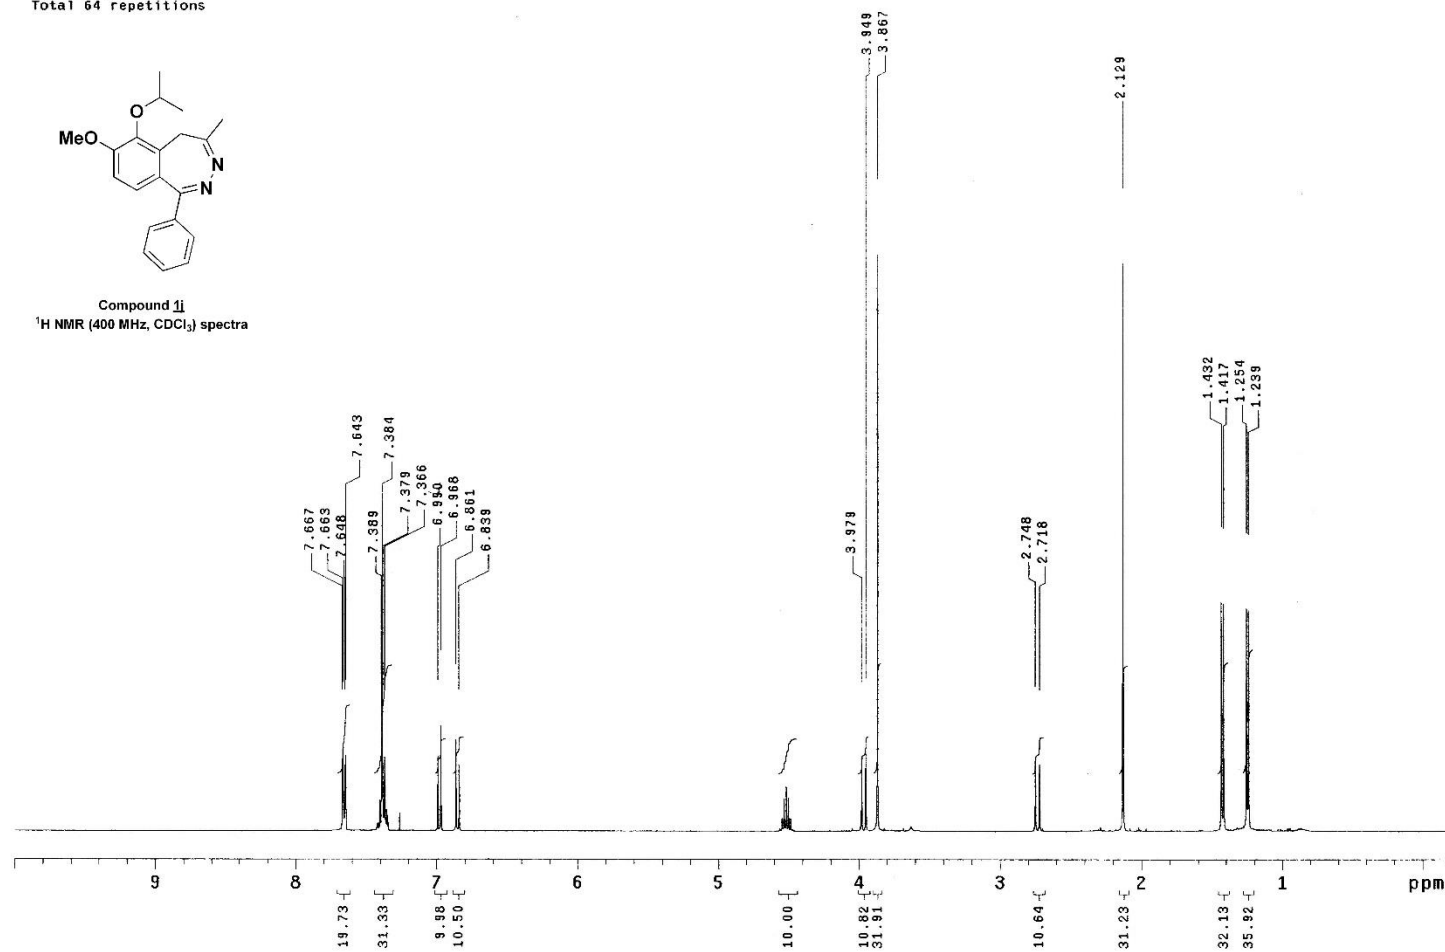

## Compound 1j

YL1040827

Pulse Sequence: s2pu1  
UNITYplus-400 "unity400"  
Date: Aug 31 2015  
Solvent: CDCl<sub>3</sub>  
Ambient temperature  
Total 64 repetitions



Compound 1j  
<sup>1</sup>H NMR (400 MHz, CDCl<sub>3</sub>) spectra

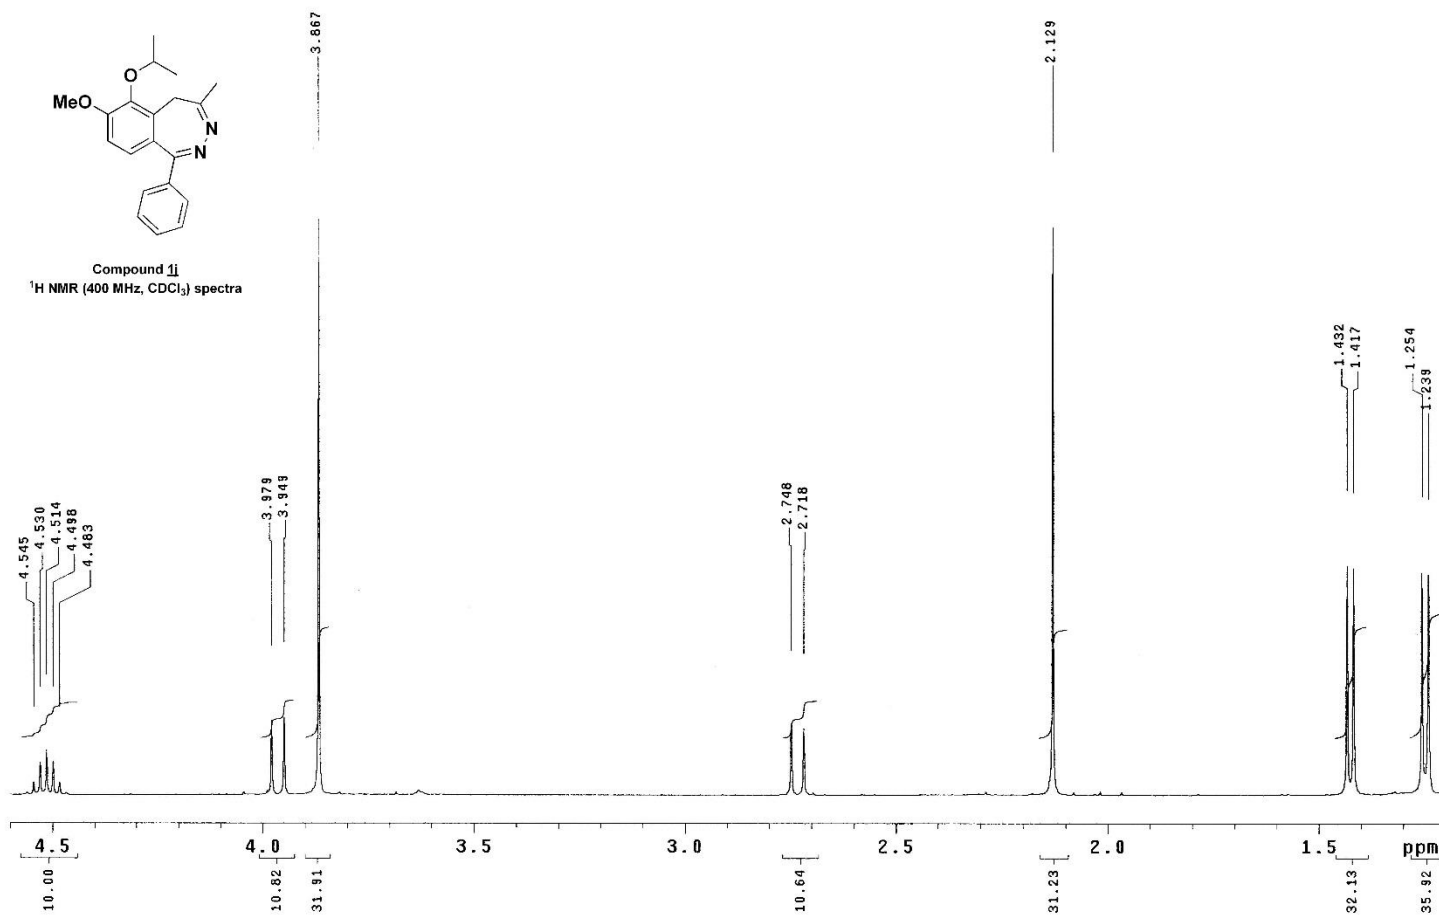



## Compound 1j

YL1040827

Pulse Sequence: s2pul  
UNITYplus-400 "unity400"  
Date: Aug 31 2015  
Solvent: CDCl<sub>3</sub>  
Ambient temperature  
Total 672 repetitions

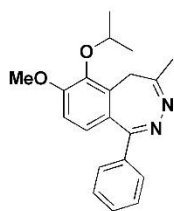

Compound 1j  
<sup>13</sup>C NMR (100 MHz, CDCl<sub>3</sub>) spectra

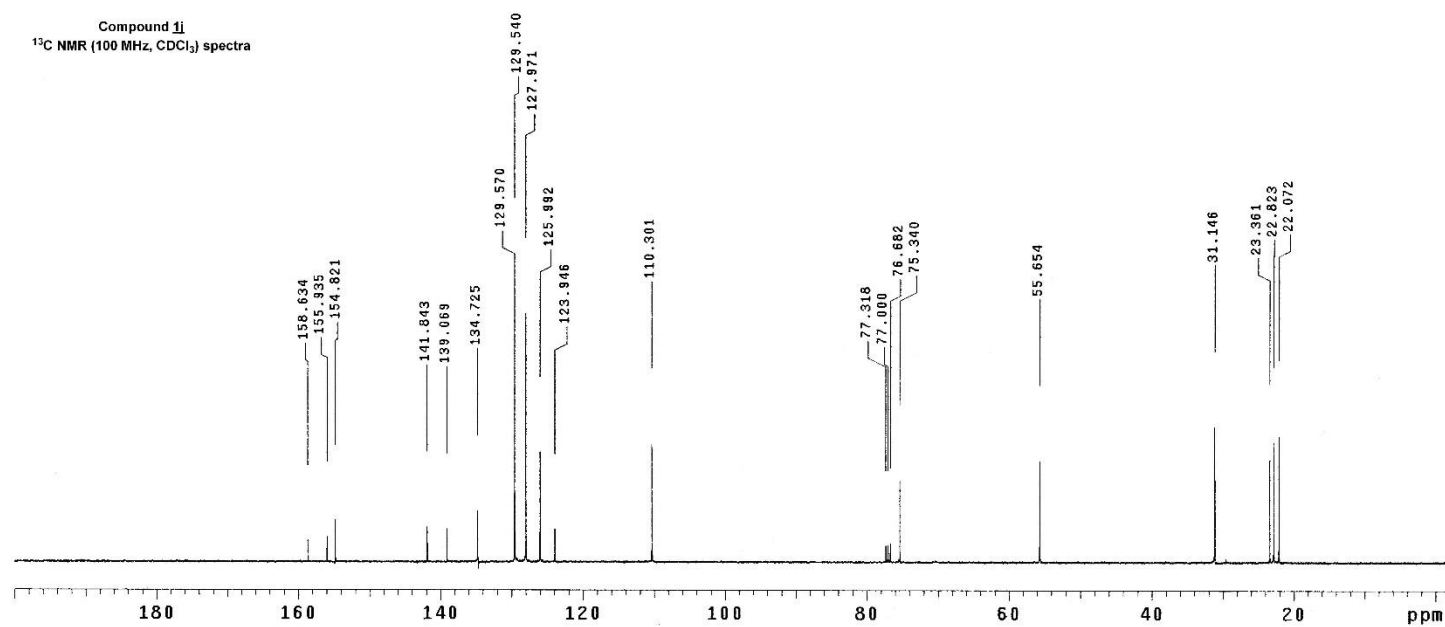

## Compound 1k

YL1040730

Pulse Sequence: s2pul

UNITYplus-400 "unity400"

Date: Aug 5 2015

Solvent: CDCl<sub>3</sub>

Ambient temperature

Total 64 repetitions

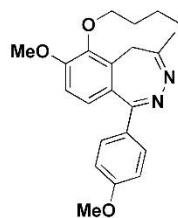

Compound 1k

<sup>1</sup>H NMR (400 MHz, CDCl<sub>3</sub>) spectra

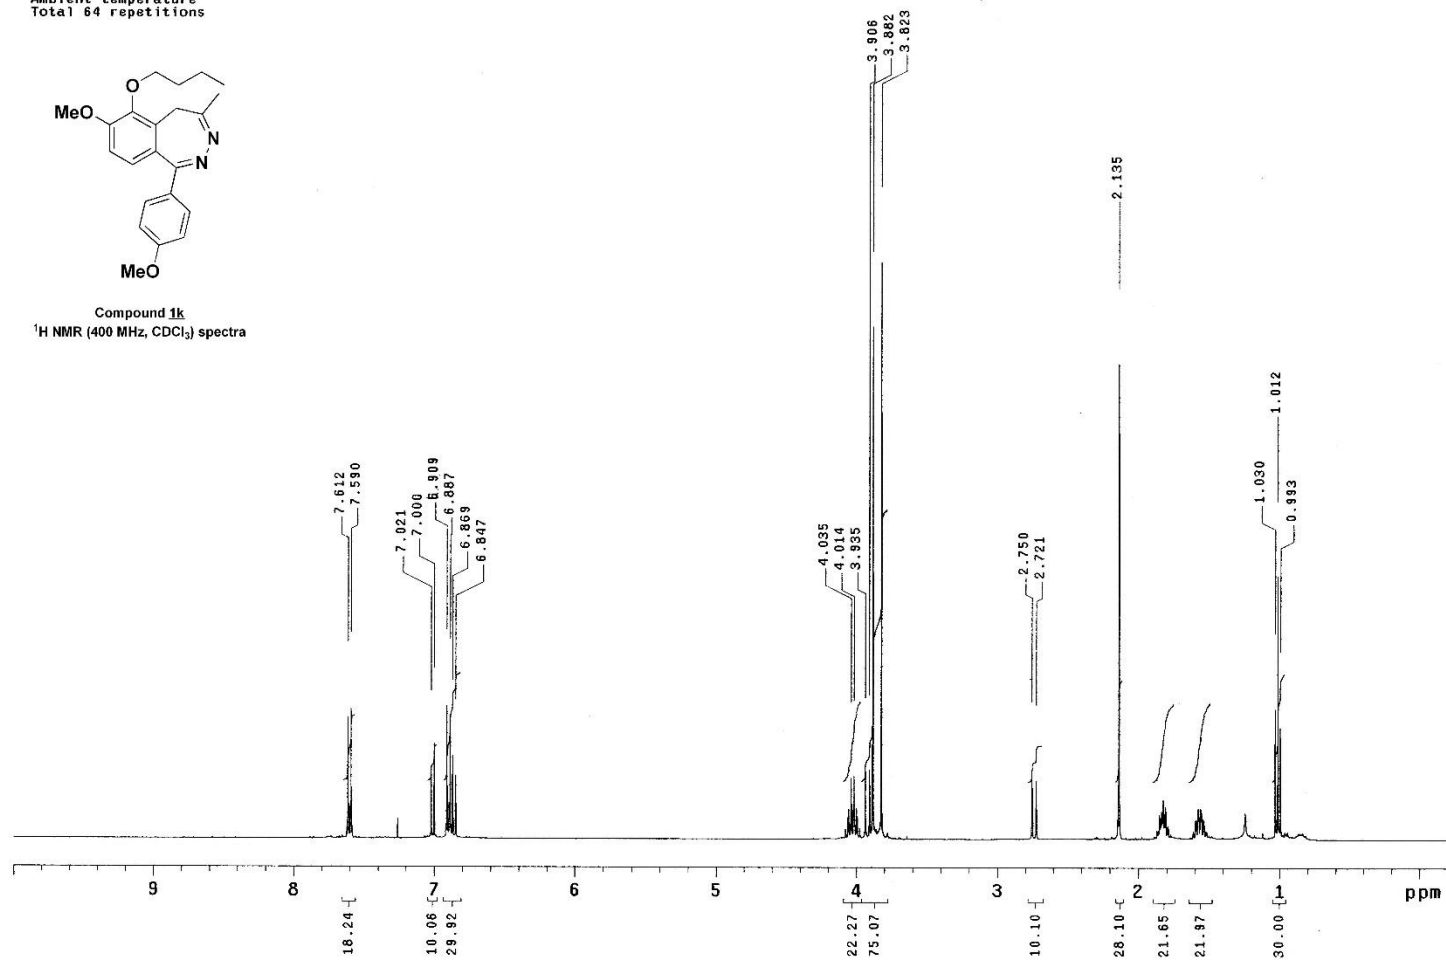

# Compound 1k

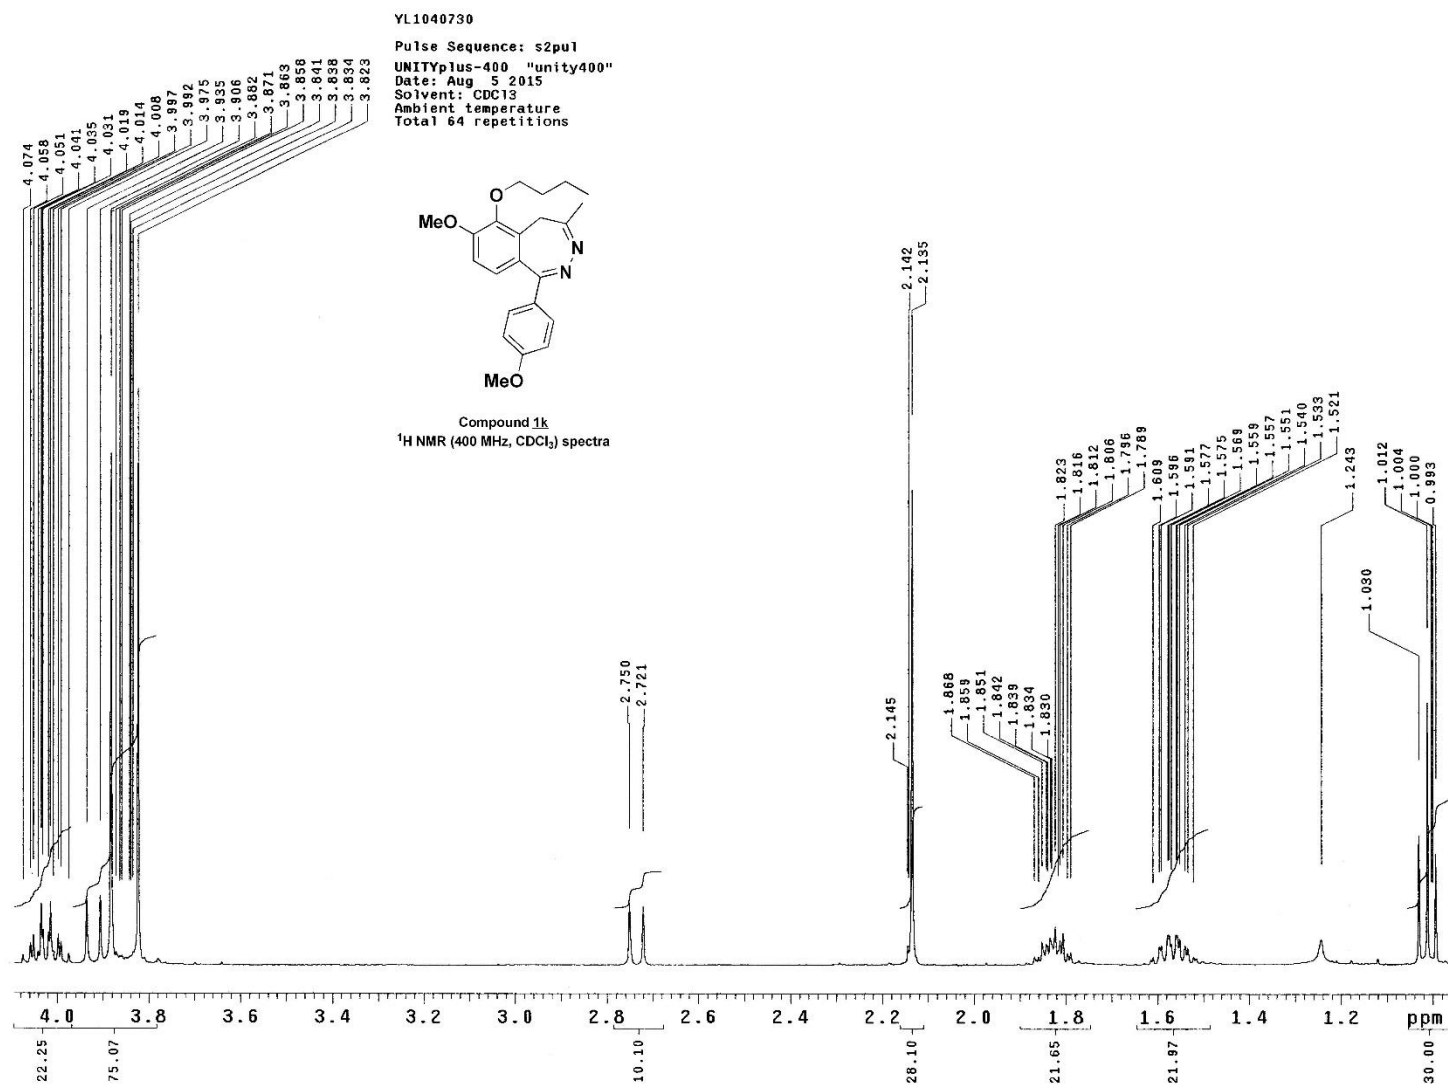

## Compound 1k

YL1040730

Pulse Sequence: s2pul  
UNITYplus-400 "unity400"  
Date: Aug 5 2015  
Solvent: CDCl<sub>3</sub>  
Ambient temperature  
Total 64 repetitions

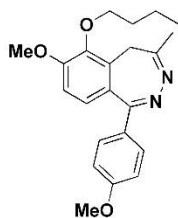

Compound 1k

<sup>1</sup>H NMR (400 MHz, CDCl<sub>3</sub>) spectra

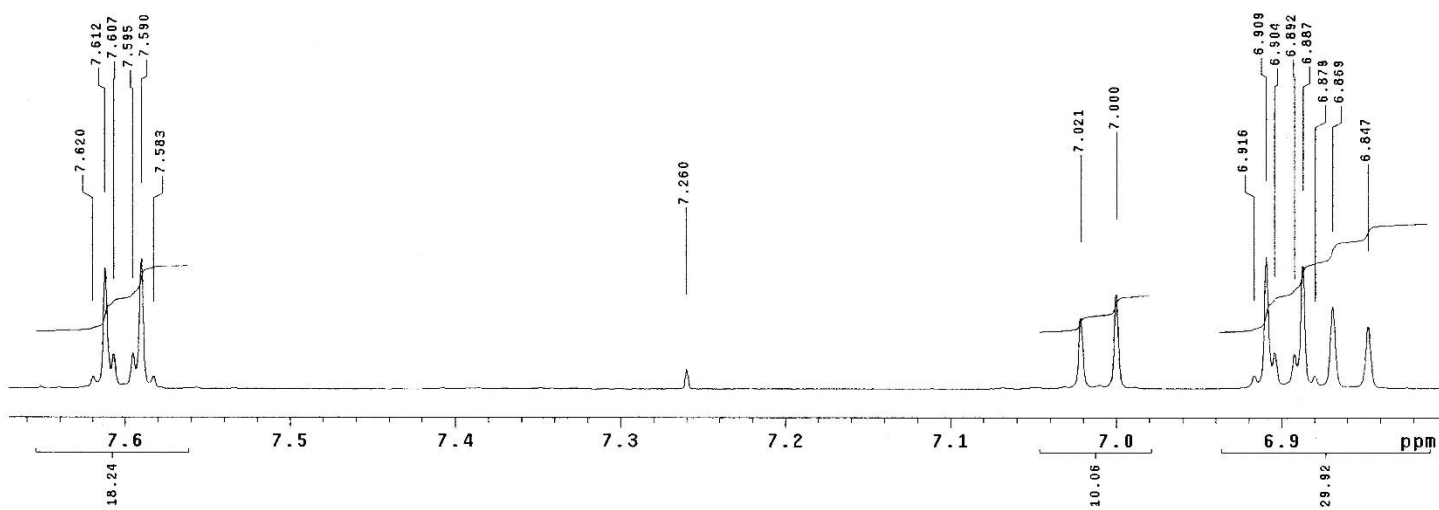

## Compound 1k

YL1040730

Pulse Sequence: s2pu1  
UNITYplus-400 "unity400"  
Date: Aug 5 2015  
Solvent: CDCl<sub>3</sub>  
Ambient temperature  
Total 1504 repetitions

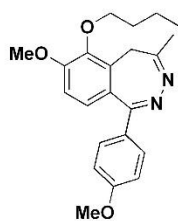

Compound **1k**

<sup>13</sup>C NMR (100 MHz, CDCl<sub>3</sub>) spectra

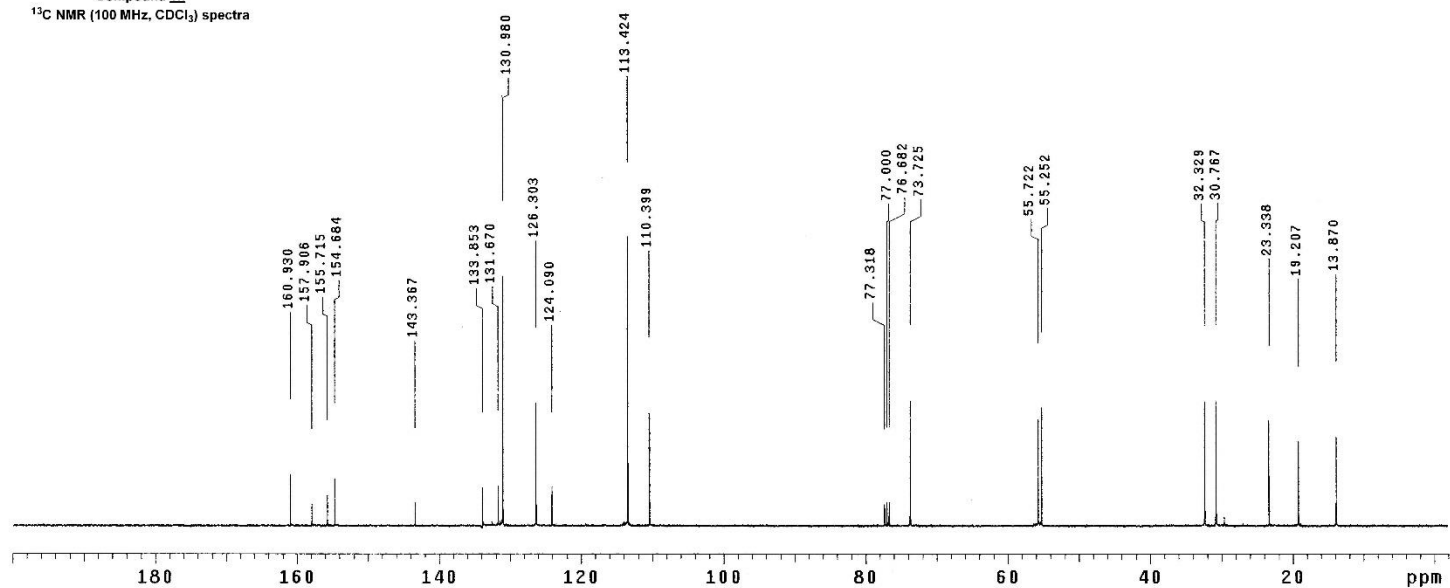

## Compound 11

YL1040822

Pulse Sequence: s2pul  
UNITYplus-400 "unity400"  
Date: Aug 24 2015  
Solvent: CDCl<sub>3</sub>  
Ambient temperature  
Total 64 repetitions

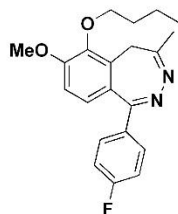

Compound 11  
<sup>1</sup>H NMR (400 MHz, CDCl<sub>3</sub>) spectra

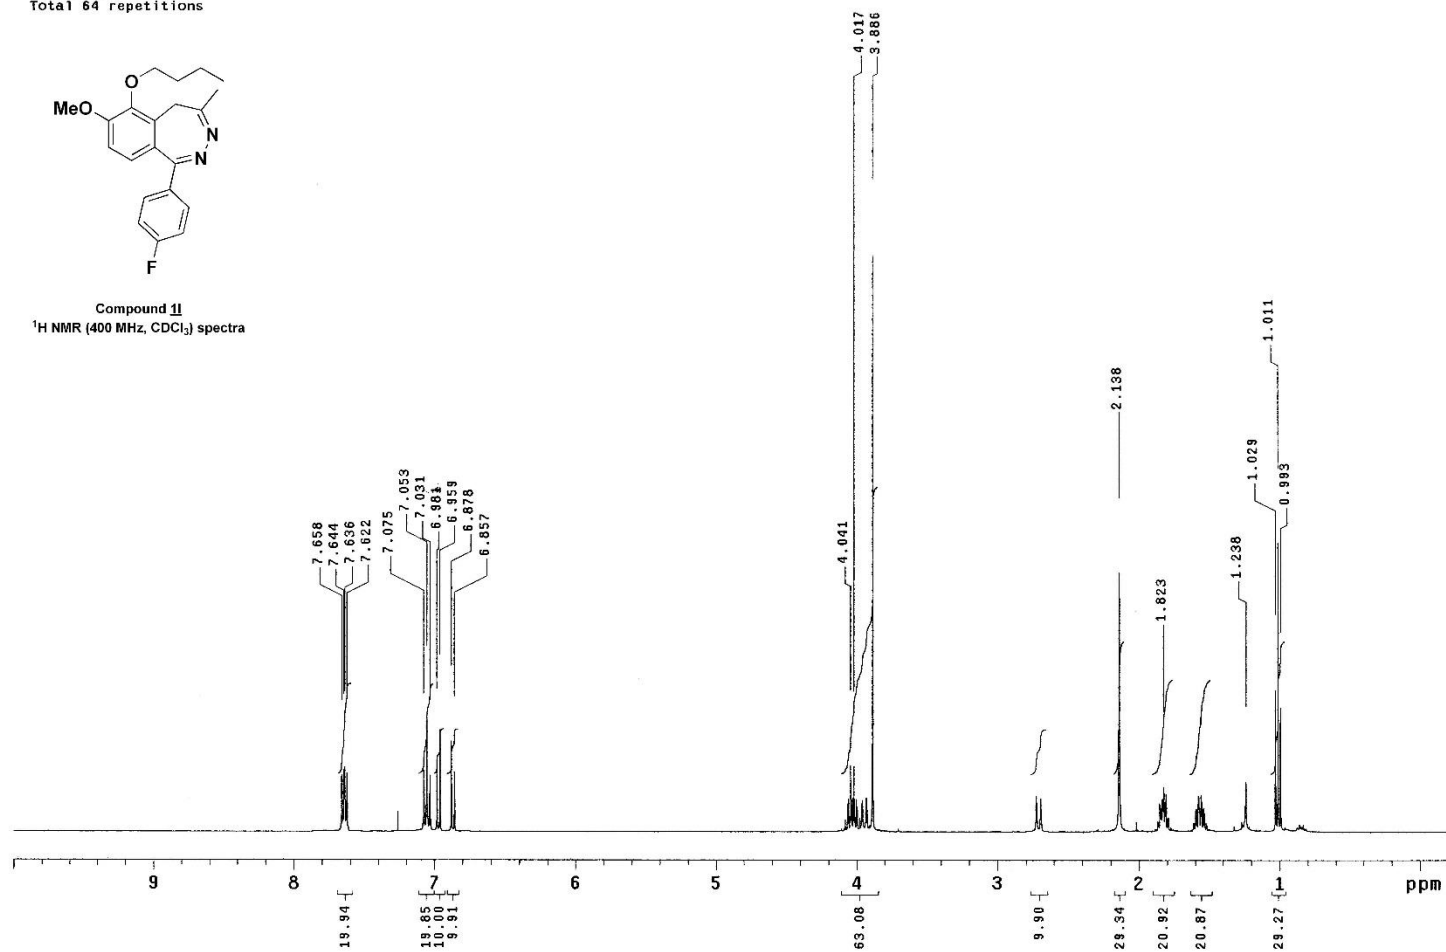

# Compound 11

YL1040822

Pulse Sequence: s2pu1

UNITYplus-400 "unity400"

Date: Aug 24 2015

Solvent: CDCl<sub>3</sub>

Ambient temperature

Total 64 repetitions

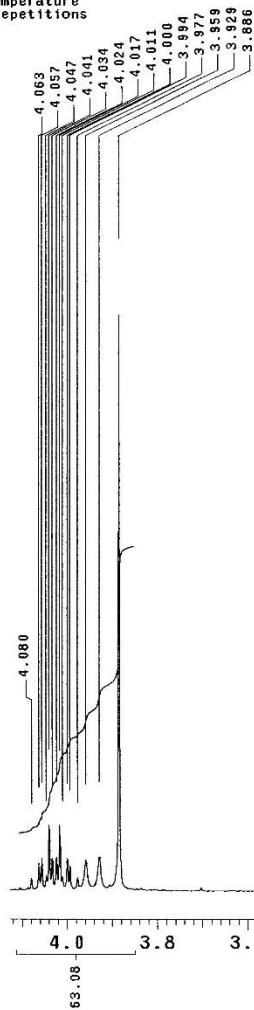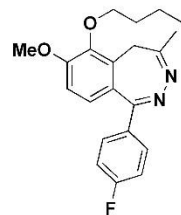

Compound 11  
<sup>1</sup>H NMR (400 MHz, CDCl<sub>3</sub>) spectra

## Compound 11

YL1040822

Pulse Sequence: s2pul  
UNITYplus-400 "unity400"  
Date: Aug 24 2015  
Solvent: CDCl<sub>3</sub>  
Ambient temperature  
Total 64 repetitions

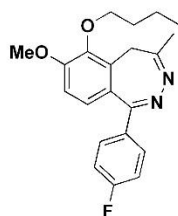

Compound 11  
<sup>1</sup>H NMR (400 MHz, CDCl<sub>3</sub>) spectra

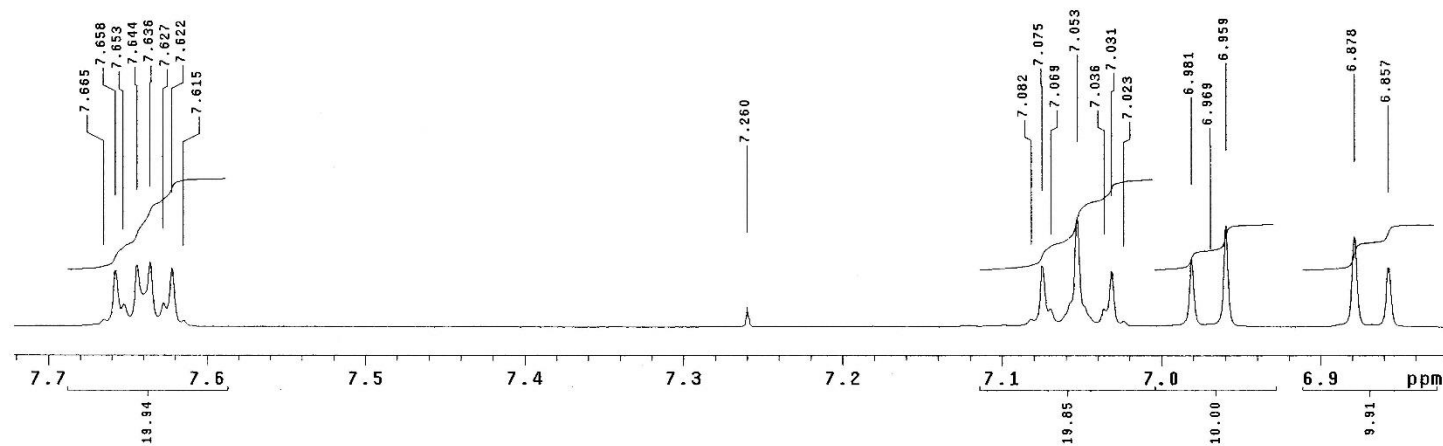



## Compound 1l

YL1040822

Pulse Sequence: s2pul  
UNITYplus-400 "unity400"  
Date: Aug 24 2015  
Solvent: CDCl<sub>3</sub>  
Ambient temperature  
Total 704 repetitions

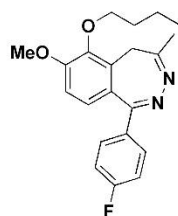

Compound 1l

<sup>13</sup>C NMR (100 MHz, CDCl<sub>3</sub>) spectra

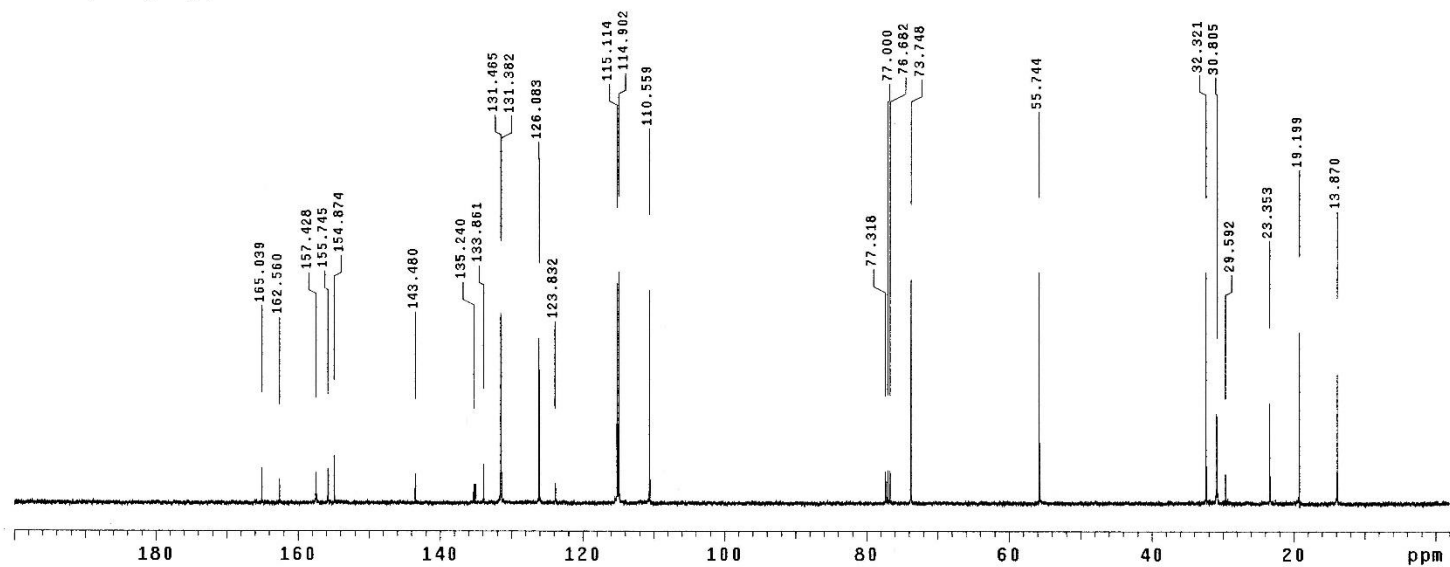

## Compound 1m

YL1040832

Pulse Sequence: s2pu1  
UNITYplus-400 "unity400"  
Date: Sep 2 2015  
Solvent: CDCl<sub>3</sub>  
Ambient temperature  
Total 64 repetitions

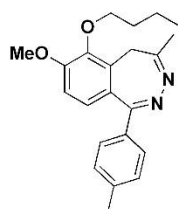

Compound 1m  
<sup>1</sup>H NMR (400 MHz, CDCl<sub>3</sub>) spectra

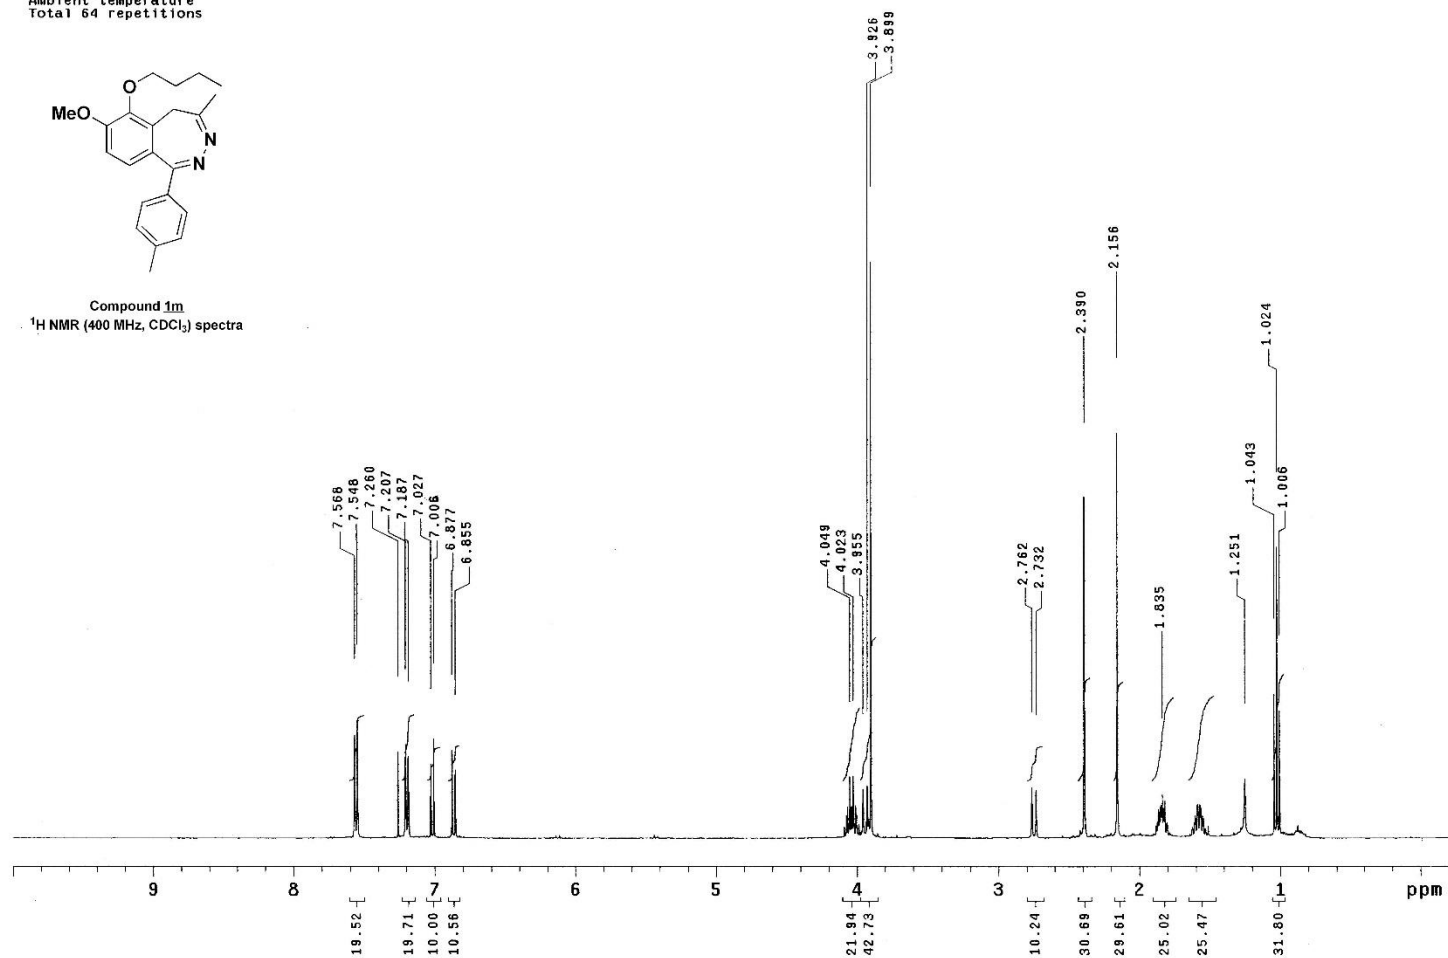

# Compound 1m

YL1040832

Pulse Sequence: s2pu1

UNITYplus-400 "unity400"

Date: Sep 2 2015

Solvent: CDCl<sub>3</sub>

Ambient temperature

Total 64 repetitions

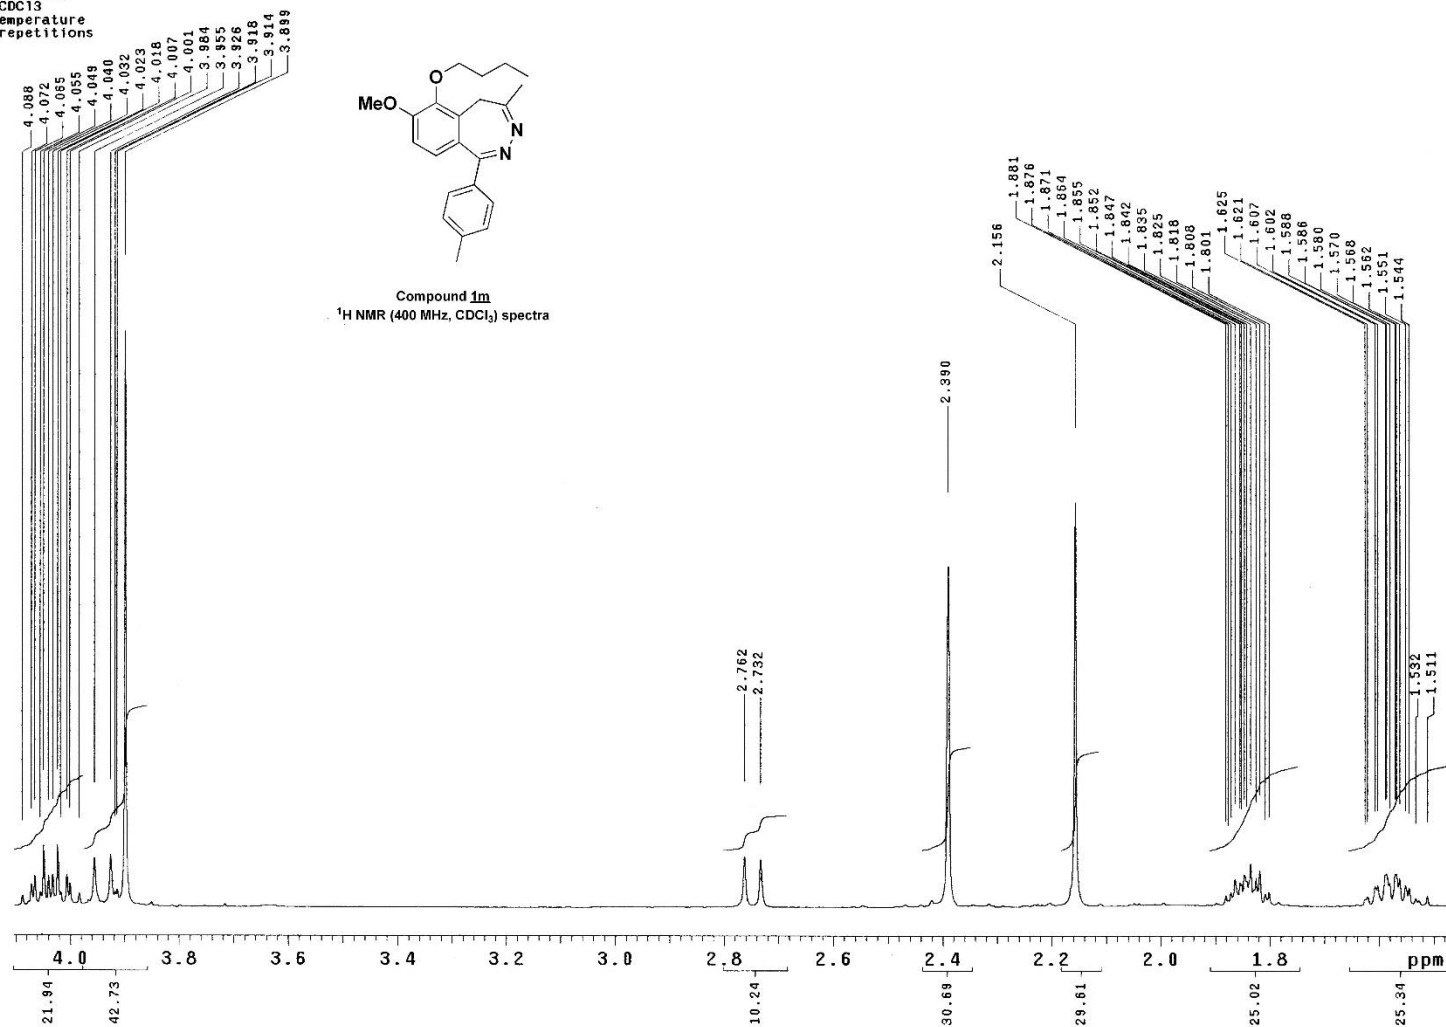

## Compound 1m

YL1040832

Pulse Sequence: s2pu1  
UNITYplus-400 "unity400"  
Date: Sep 2 2015  
Solvent: CDCl<sub>3</sub>  
Ambient temperature  
Total 3456 repetitions

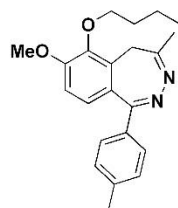

Compound 1m  
<sup>13</sup>C NMR (100 MHz, CDCl<sub>3</sub>) spectra

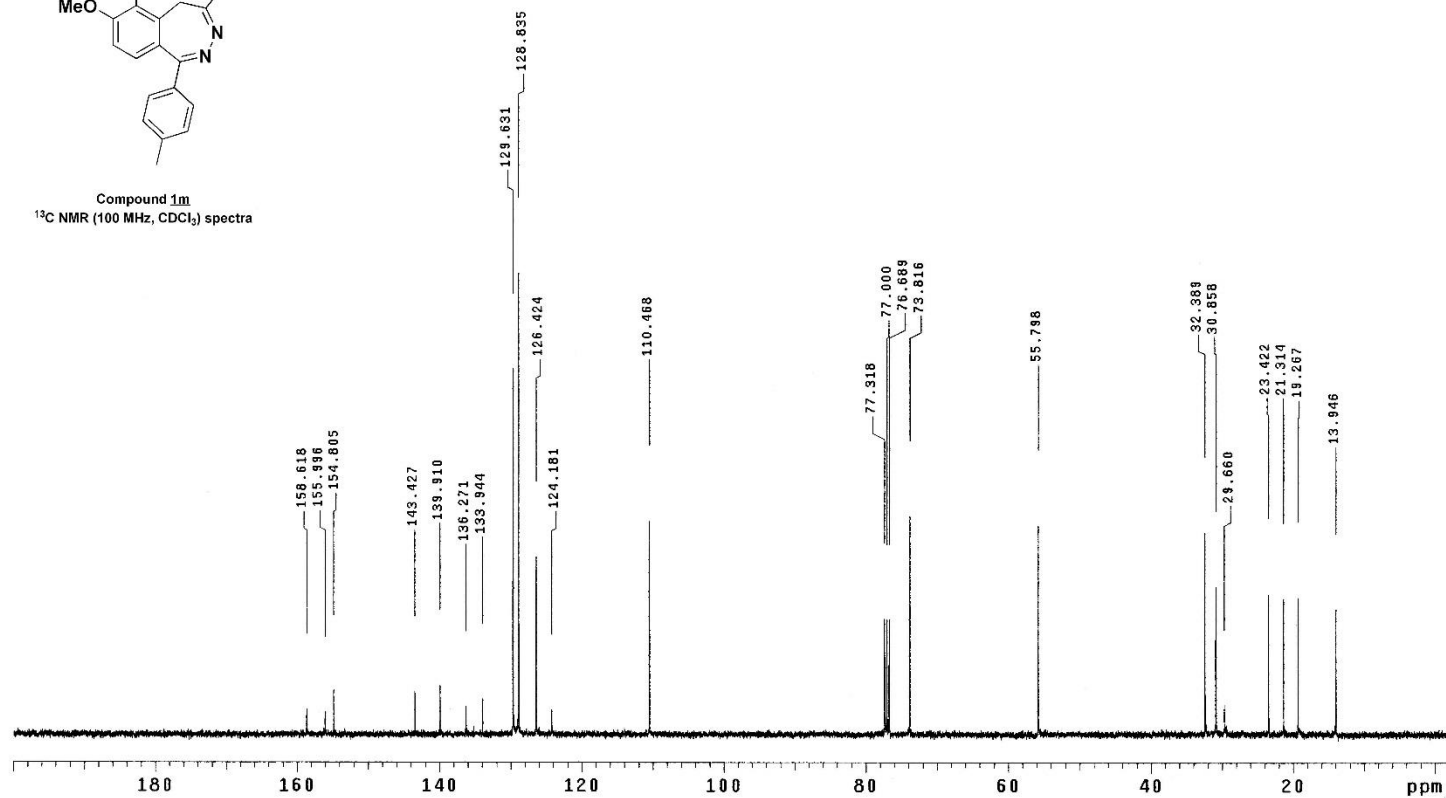

## Compound 1m

YL1040832

Pulse Sequence: s2pu1

UNITYplus-400 "unity400"

Date: Sep 2 2015

Solvent: CDCl<sub>3</sub>

Ambient temperature

Total 3456 repetitions

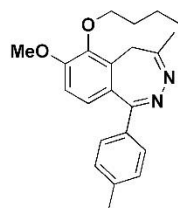

Compound 1m

<sup>13</sup>C NMR (100 MHz, CDCl<sub>3</sub>) spectra

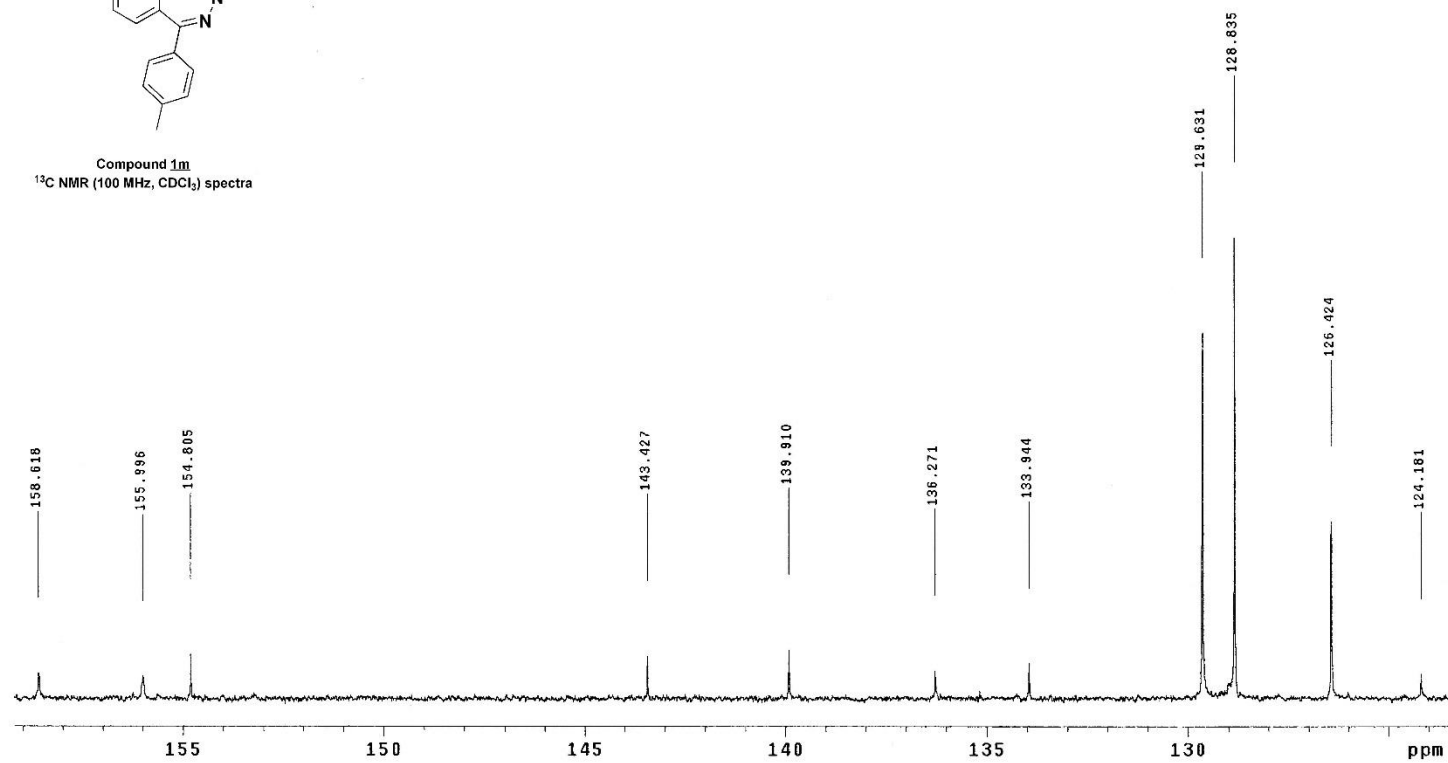

## Compound 1n

YL1040826

Pulse Sequence: s2pu1

UNITYplus-400 "unity400"

Date: Aug 26 2015

Solvent: CDCl<sub>3</sub>

Ambient temperature

Total 64 repetitions

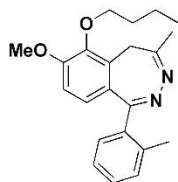

Compound 1n

<sup>1</sup>H NMR (400 MHz, CDCl<sub>3</sub>) spectra

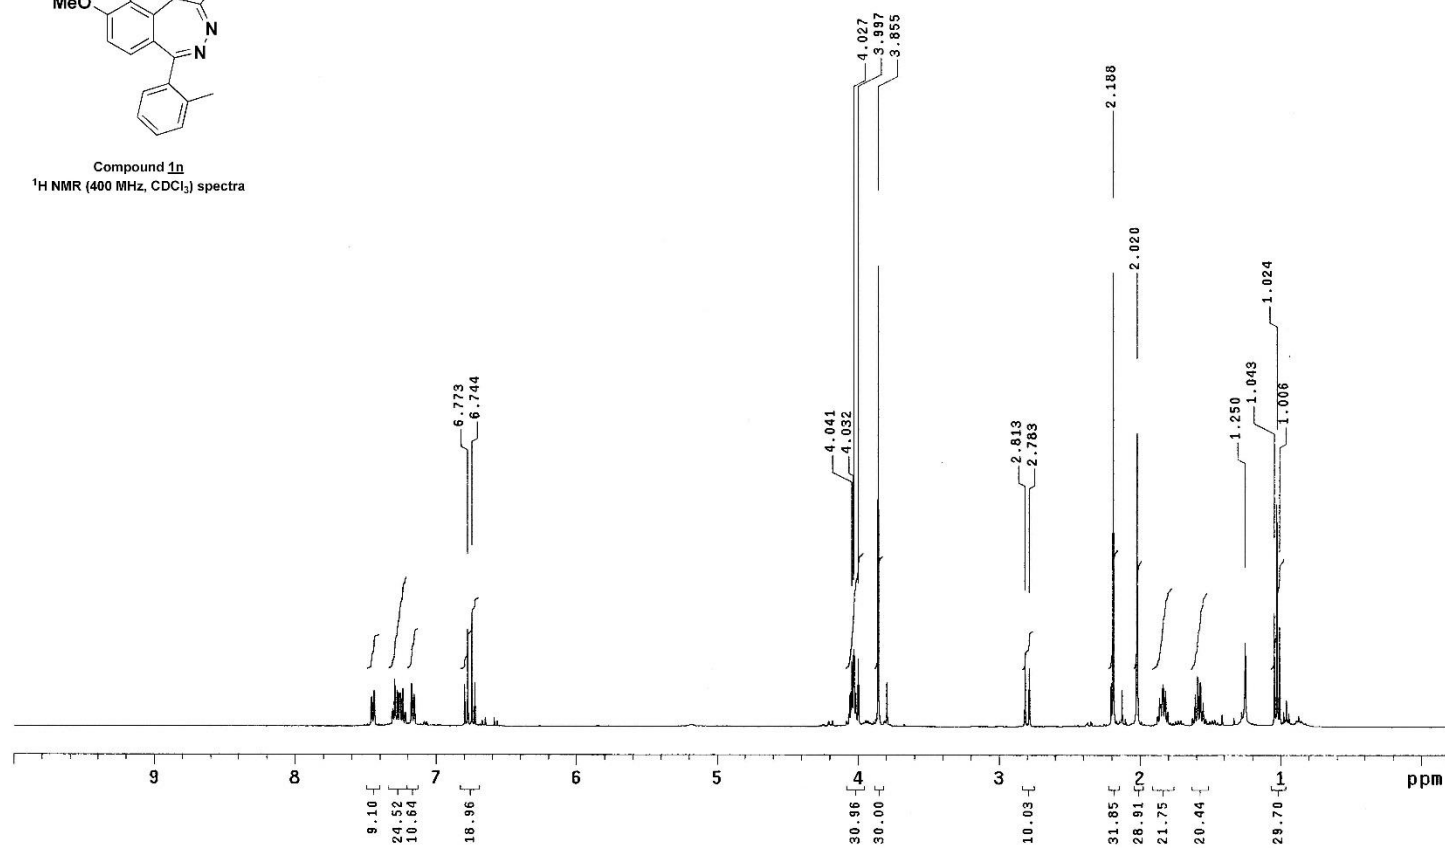

# Compound 1n

YL1040826

Pulse Sequence: s2pu1

UNITYplus-400 "unity400"

Date: Aug 26 2015

Solvent: CDCl<sub>3</sub>

Ambient temperature

Total 64 repetitions

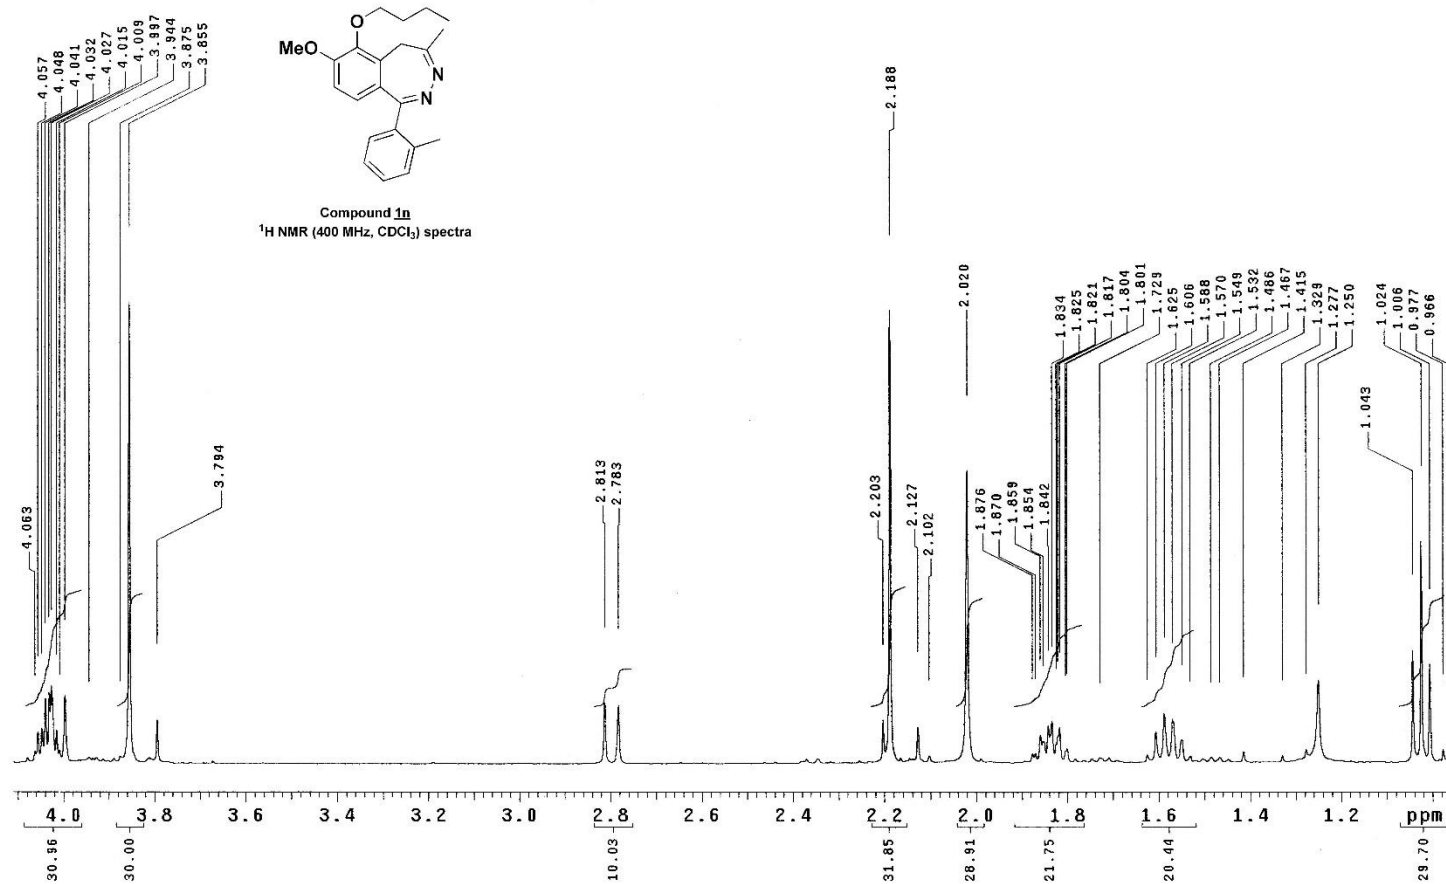

## Compound 1n

YL1040826

Pulse Sequence: s2pu1

UNITYplus-400 "unity400"

Date: Aug 26 2015

Solvent: CDCl<sub>3</sub>

Ambient temperature

Total 64 repetitions



Compound 1n

<sup>1</sup>H NMR (400 MHz, CDCl<sub>3</sub>) spectra

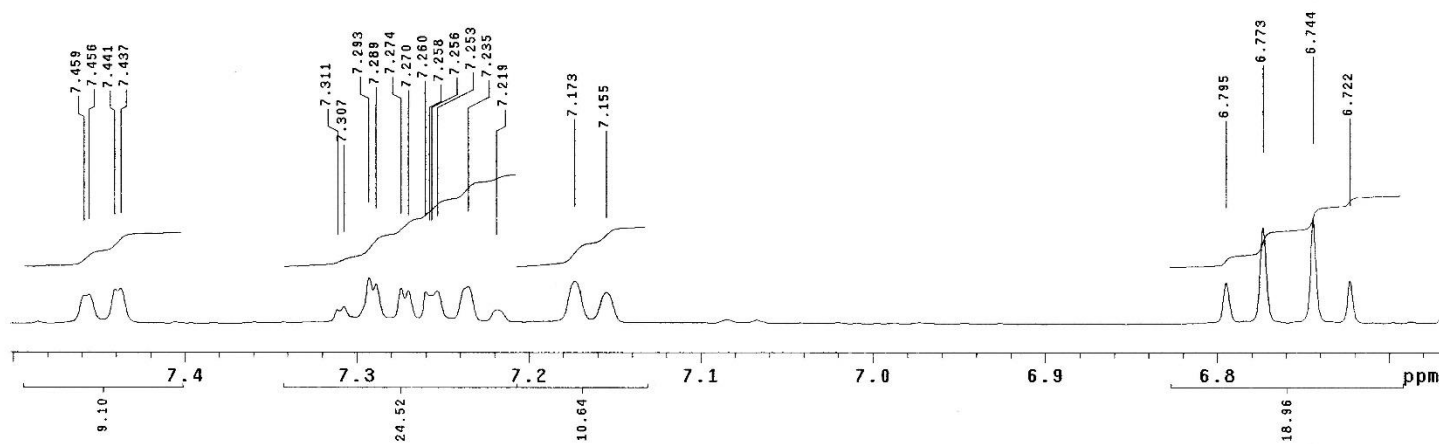



## Compound 1n

YL1040826

Pulse Sequence: s2pu1

UNITYplus-400 "unity400"

Date: Aug 26 2015

Solvent: CDCl<sub>3</sub>

Ambient temperature

Total 64000 repetitions

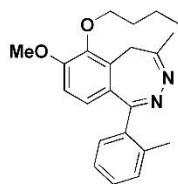

Compound 1n

<sup>13</sup>C NMR (100 MHz, CDCl<sub>3</sub>) spectra

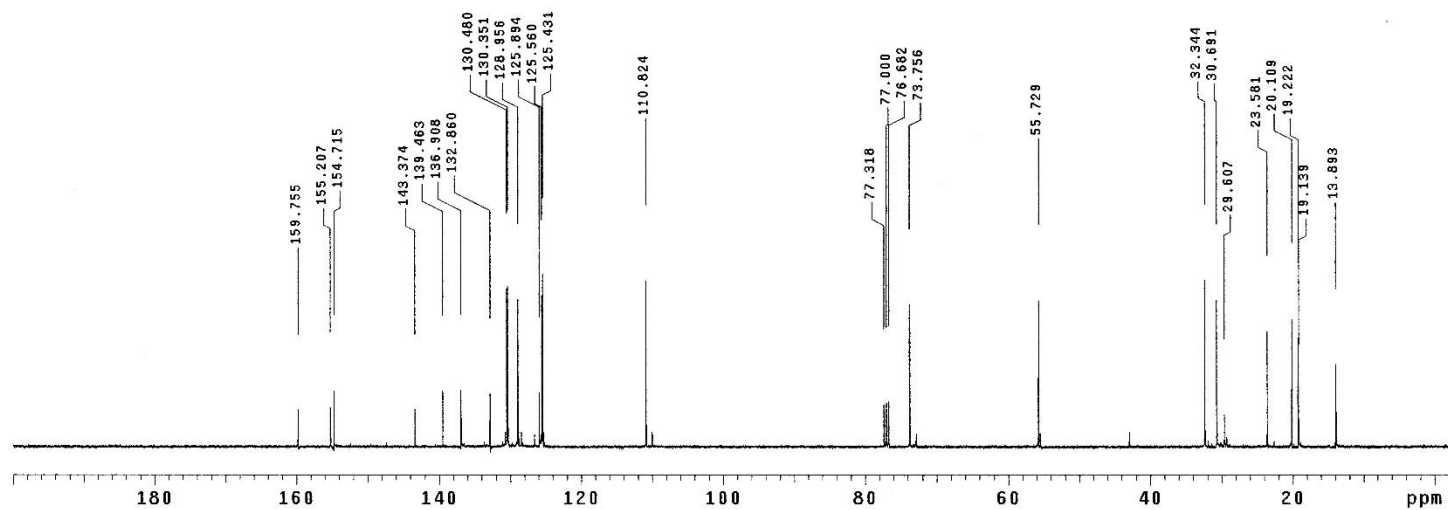

## Compound 1n

YL1040826

Pulse Sequence: s2pu1

UNITYplus-400 "unity400"

Date: Aug 26 2015

Solvent: CDCl<sub>3</sub>

Ambient temperature

Total 64000 repetitions

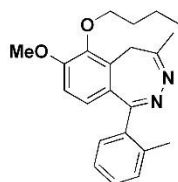

Compound 1n

<sup>13</sup>C NMR (100 MHz, CDCl<sub>3</sub>) spectra

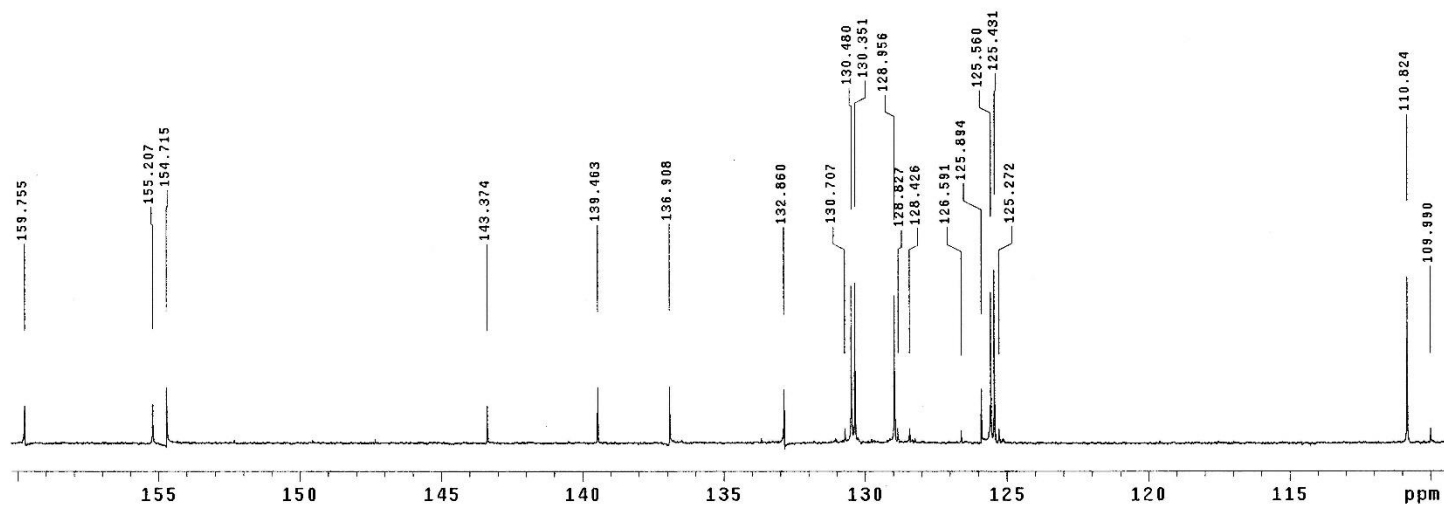

## Compound 1o

YL1040828

Pulse Sequence: s2pul

UNITYplus-400 "unity400"

Date: Aug 31 2015

Solvent: CDCl<sub>3</sub>

Ambient temperature

Total 64 repetitions

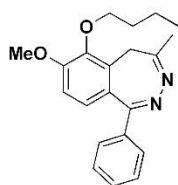

Compound 1o  
<sup>1</sup>H NMR (400 MHz, CDCl<sub>3</sub>) spectra

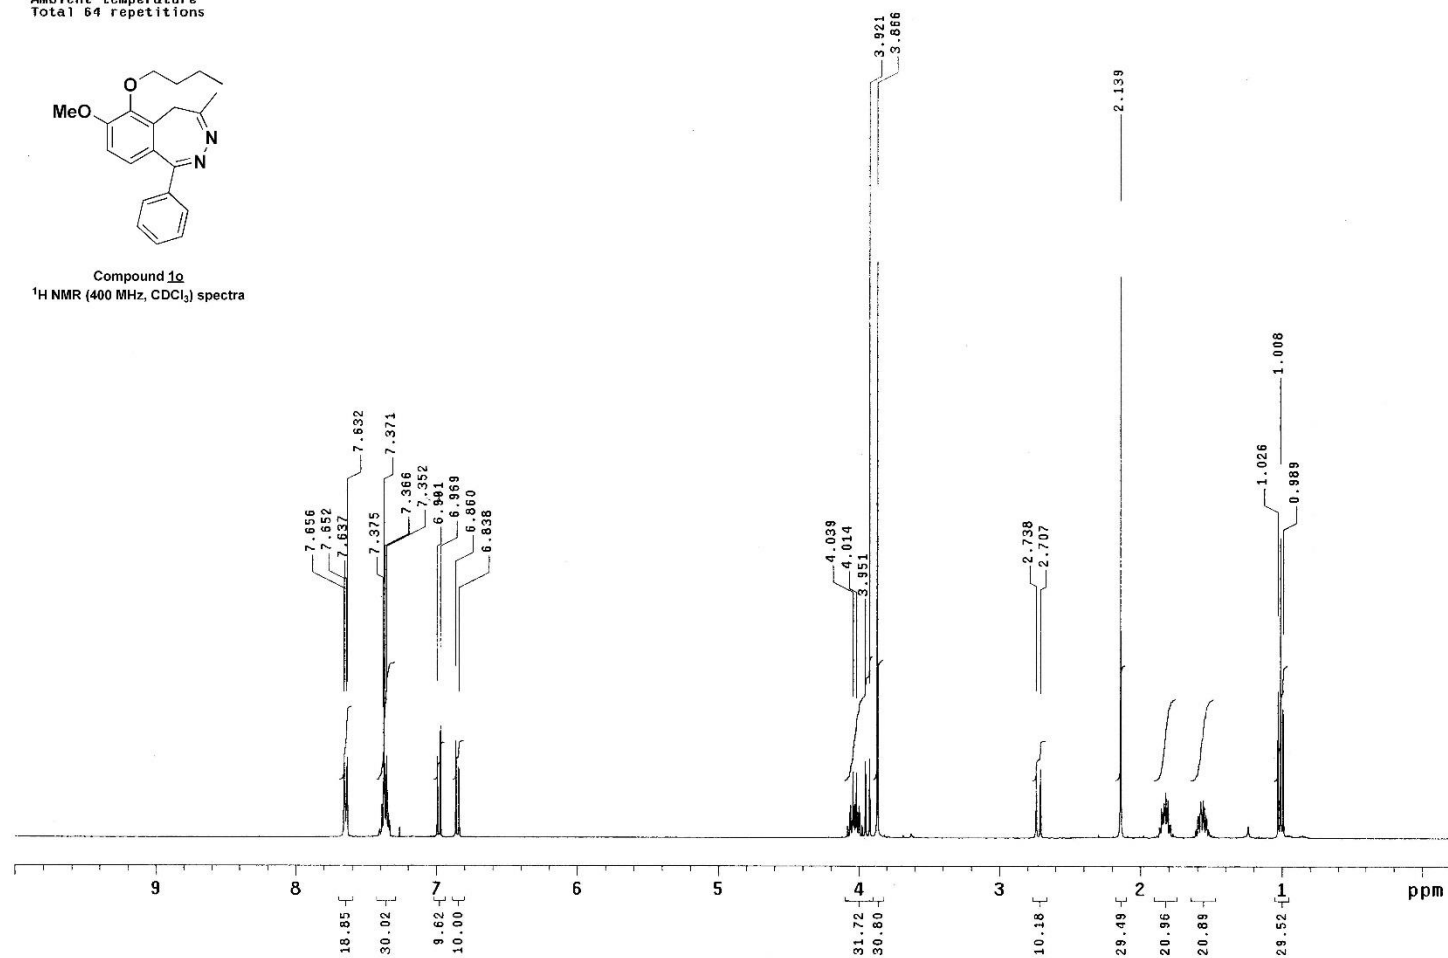

## Compound 1o

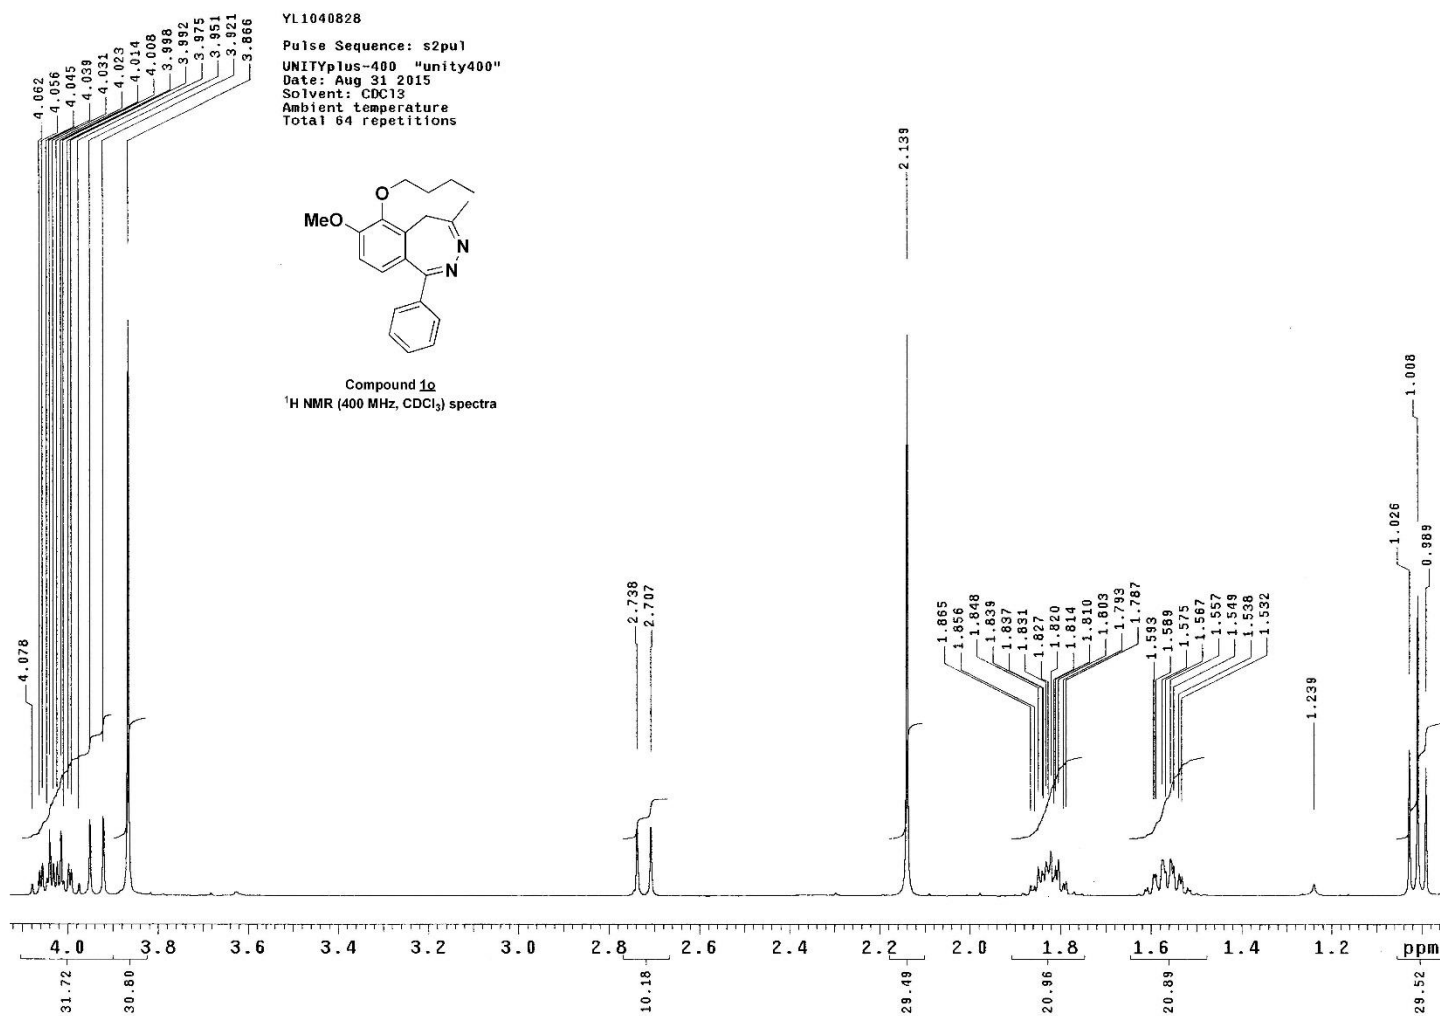

## Compound 1o

YL1040828

Pulse Sequence: s2pul

UNITYplus-400 "unity400"

Date: Aug 31 2015

Solvent: CDCl<sub>3</sub>

Ambient temperature

Total 64 repetitions

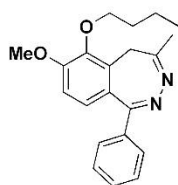

Compound 1o

<sup>1</sup>H NMR (400 MHz, CDCl<sub>3</sub>) spectra

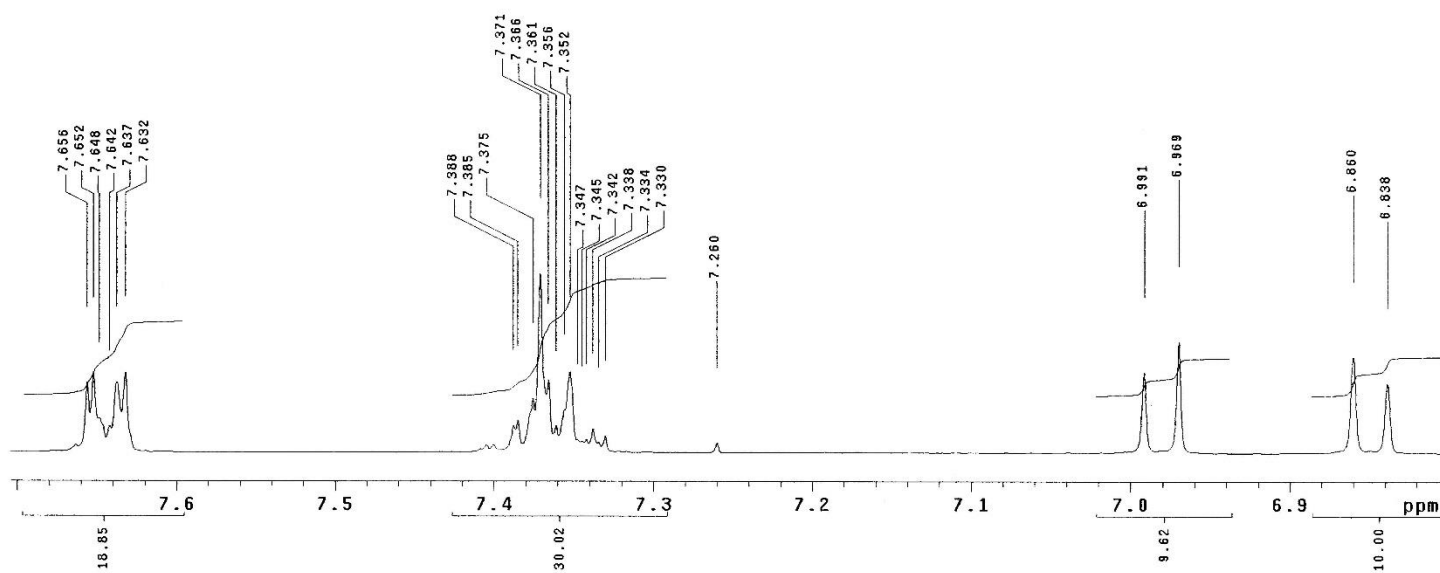

## Compound 1o

YL1040828

Pulse Sequence: s2pu1

UNITYplus-400 "unity400"

Date: Aug 31 2015

Solvent: CDCl<sub>3</sub>

Ambient temperature

Total 336 repetitions

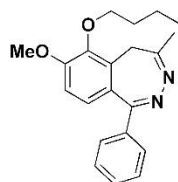

Compound 1o

<sup>13</sup>C NMR (100 MHz, CDCl<sub>3</sub>) spectra

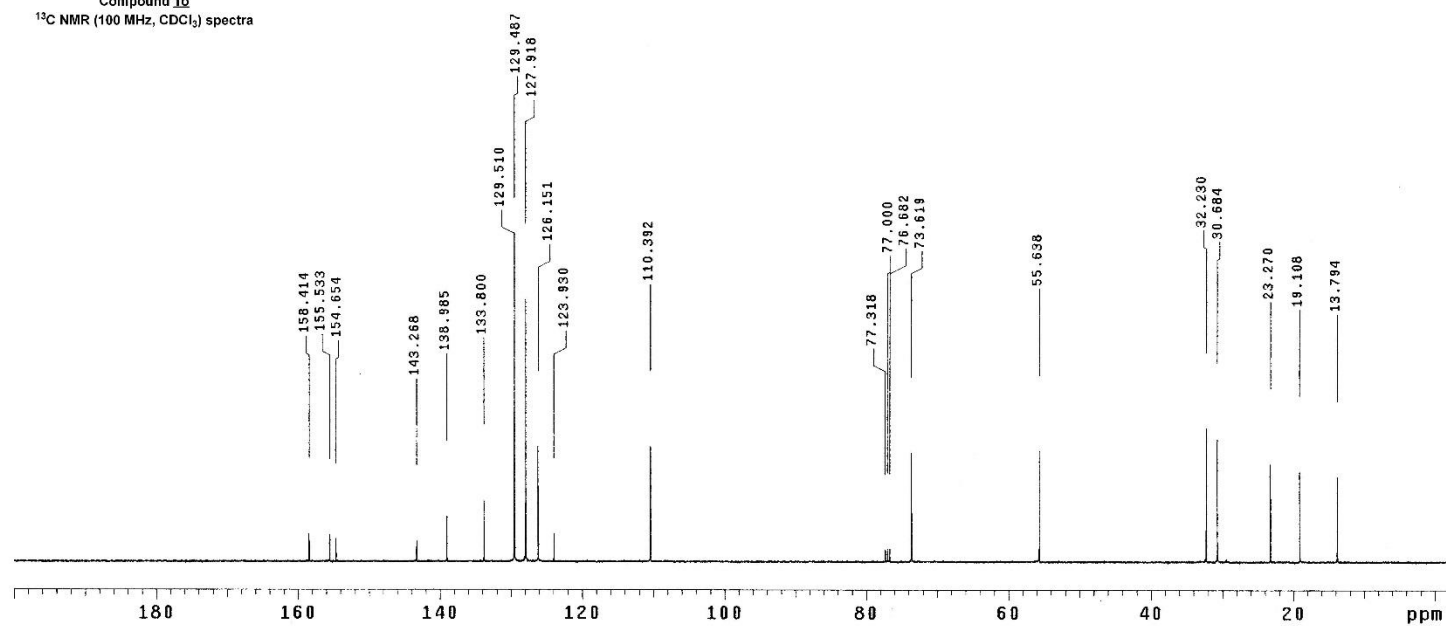

## Compound 1p

YL1040805

Pulse Sequence: s2pul  
UNITYplus-400 "unity400"  
Date: Aug 20 2015  
Solvent: CDCl<sub>3</sub>  
Ambient temperature  
Total 64 repetitions

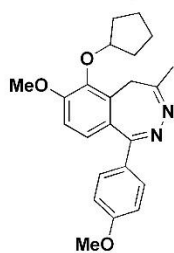

Compound 1p  
<sup>1</sup>H NMR (400 MHz, CDCl<sub>3</sub>) spectra

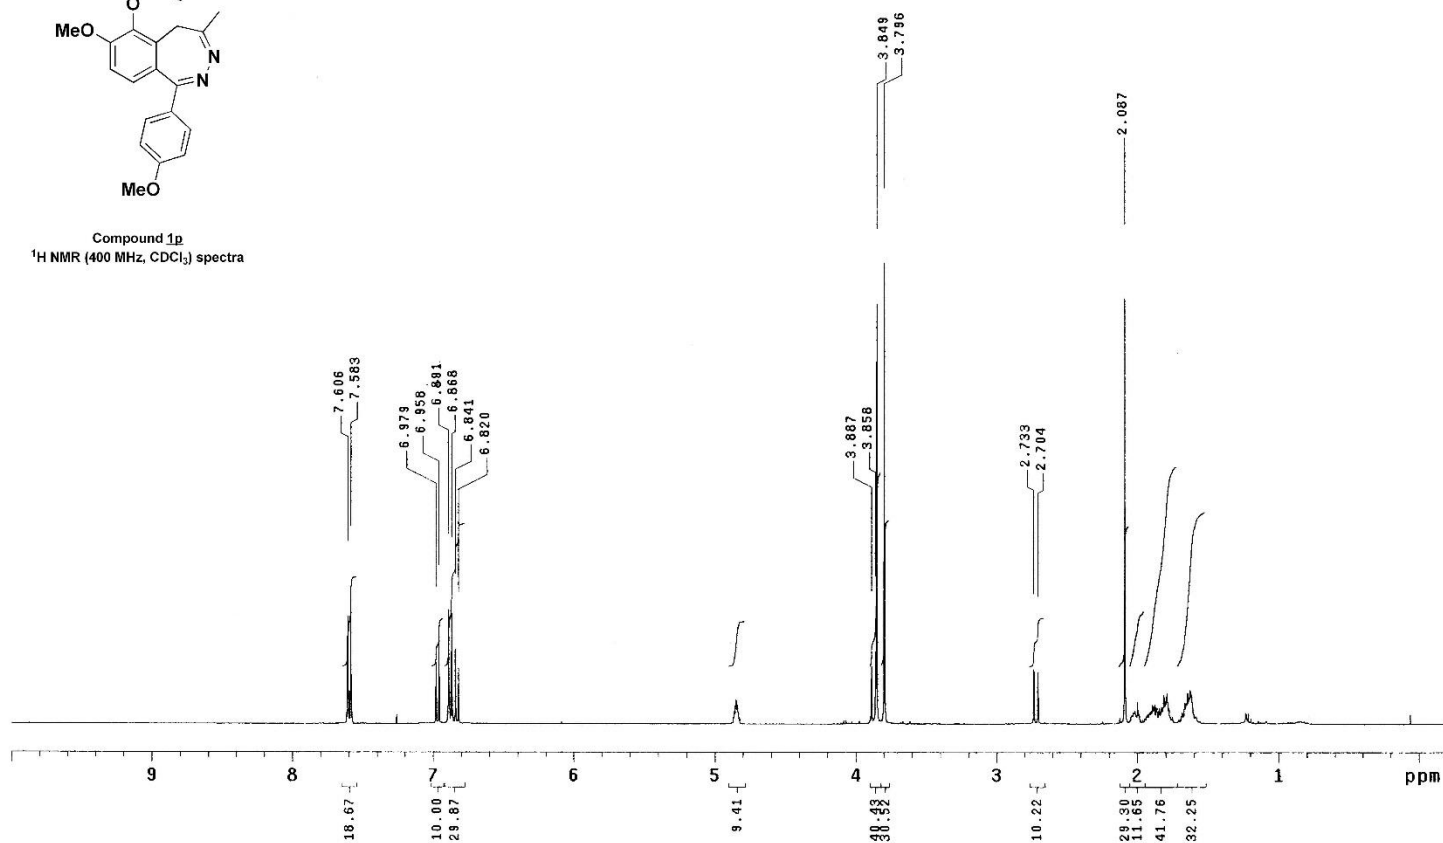

# Compound 1p

YL1040805

Pulse Sequence: s2pul  
 UNITYplus-400 "unity400"  
 Date: Aug 20 2015  
 Solvent: CDCl<sub>3</sub>  
 Ambient temperature  
 Total 64 repetitions

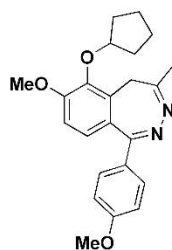

Compound 1p  
<sup>1</sup>H NMR (400 MHz, CDCl<sub>3</sub>) spectra

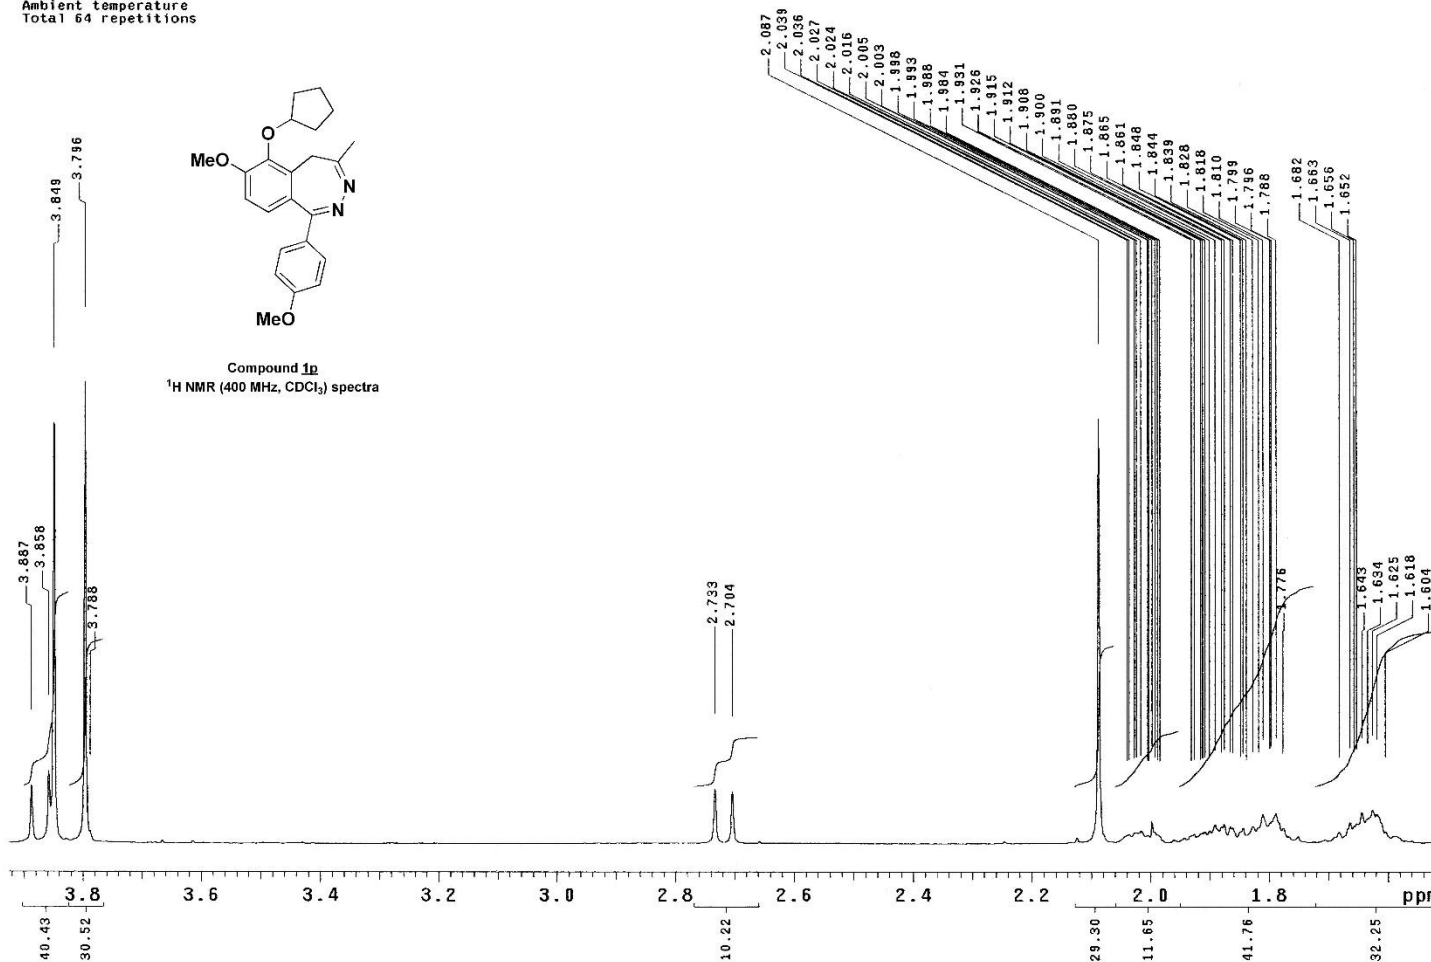



## Compound 1p

YL1040805

Pulse Sequence: s2pul  
UNITYplus-400 "unity400"  
Date: Aug 20 2015  
Solvent: CDCl<sub>3</sub>  
Ambient temperature  
Total 64 repetitions

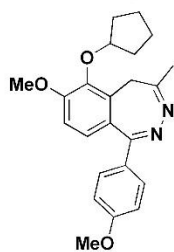

Compound 1p  
<sup>1</sup>H NMR (400 MHz, CDCl<sub>3</sub>) spectra

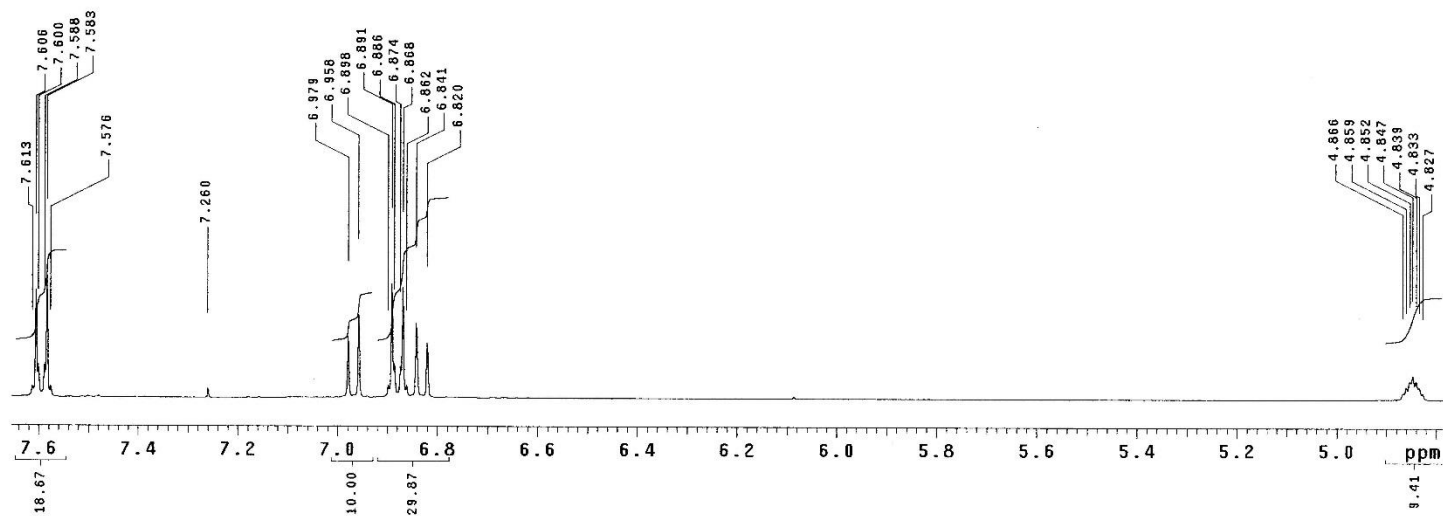

## Compound 1p

YL1040805

Pulse Sequence: s2pul

UNITYplus-400 "unity400"

Date: Aug 20 2015

Solvent: CDCl<sub>3</sub>

Ambient temperature

Total 240 repetitions

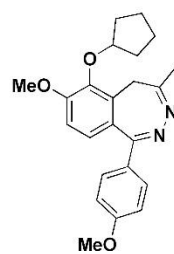

Compound 1p  
<sup>13</sup>C NMR (100 MHz, CDCl<sub>3</sub>) spectra

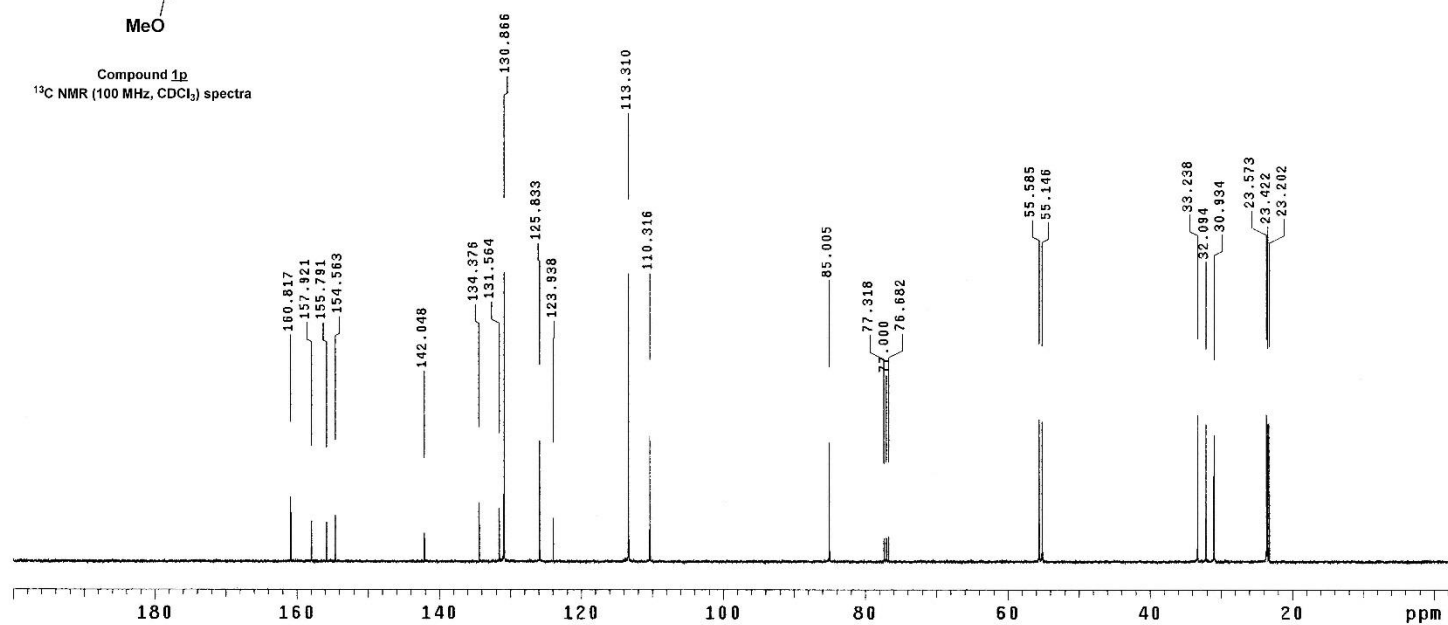

## Compound 1q

YL1040823

Pulse Sequence: s2pul

UNITYplus-400 "unity400"

Date: Aug 24 2015

Solvent: CDCl<sub>3</sub>

Ambient temperature

Total 64 repetitions

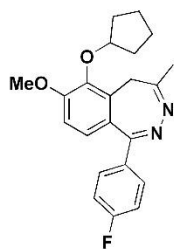

Compound 1q

<sup>1</sup>H NMR (400 MHz, CDCl<sub>3</sub>) spectra

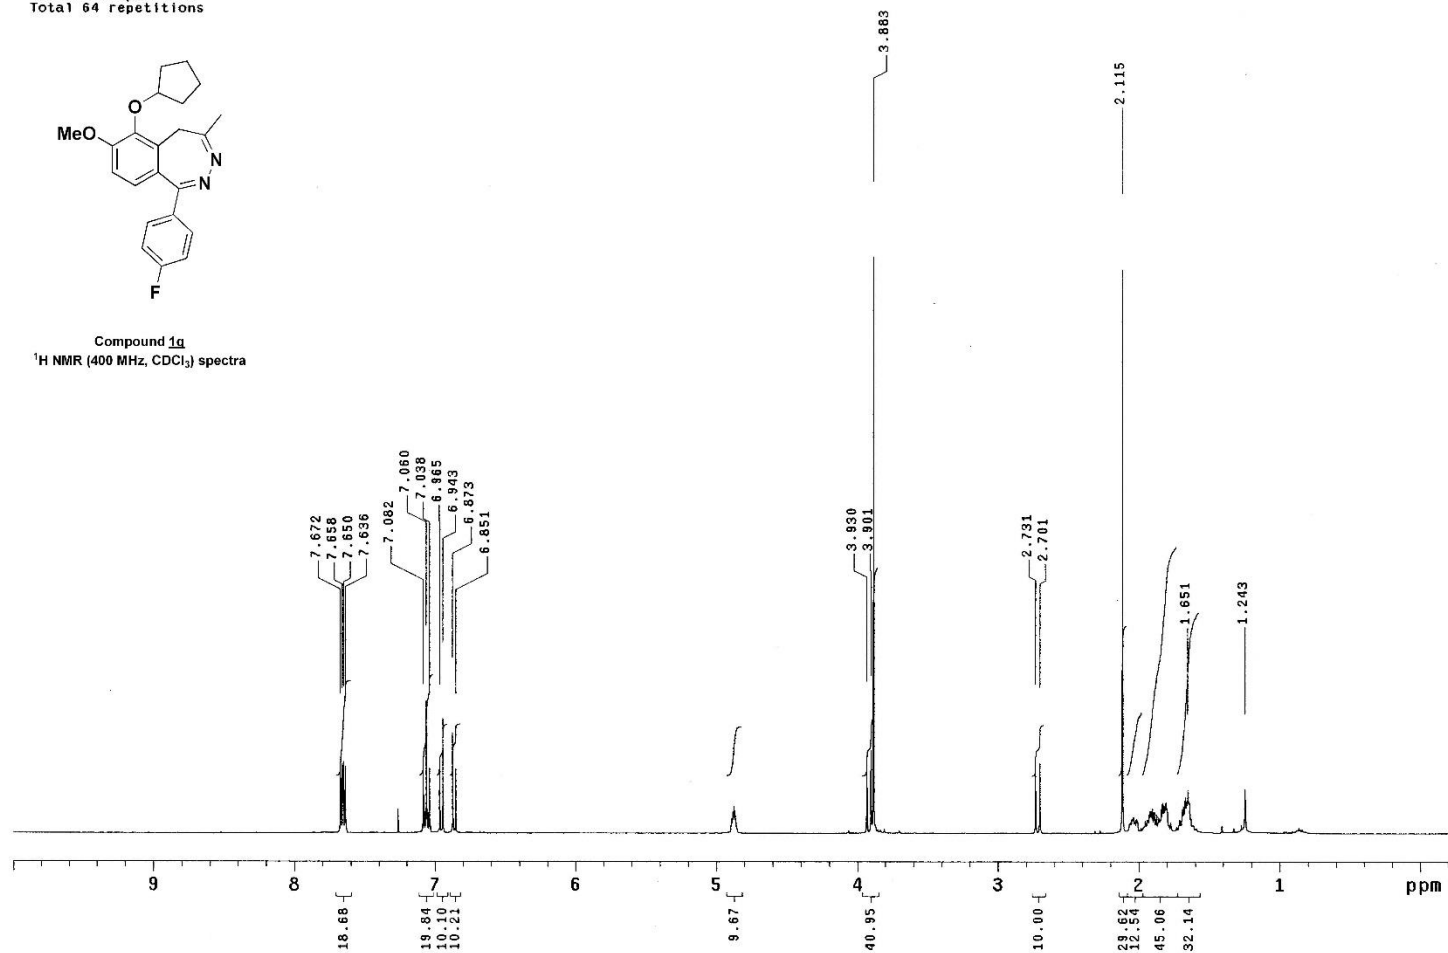

# Compound 1q

YL1040823

Pulse Sequence: s2pul  
 UNITYplus-400 "unity400"  
 Date: Aug 24 2015  
 Solvent: CDCl<sub>3</sub>  
 Ambient temperature  
 Total 64 repetitions



Compound 1q

<sup>1</sup>H NMR (400 MHz, CDCl<sub>3</sub>) spectra

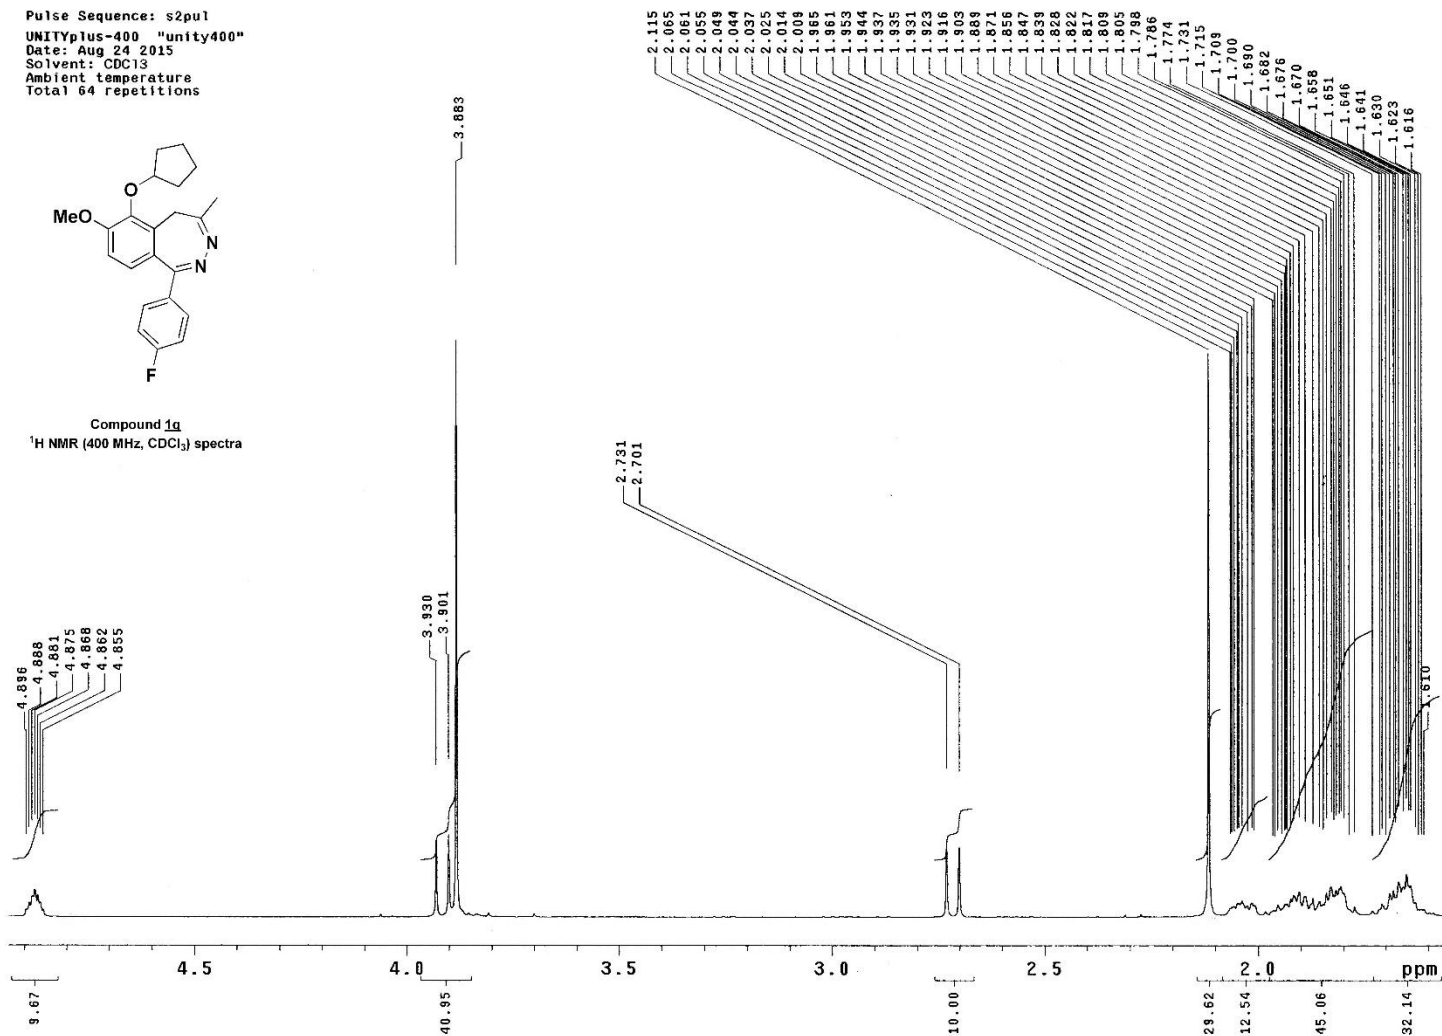

## Compound 1q

YL1040823

Pulse Sequence: s2pul  
UNITYplus-400 "unity400"  
Date: Aug 24 2015  
Solvent: CDCl<sub>3</sub>  
Ambient temperature  
Total 64 repetitions



Compound 1q

<sup>1</sup>H NMR (400 MHz, CDCl<sub>3</sub>) spectra

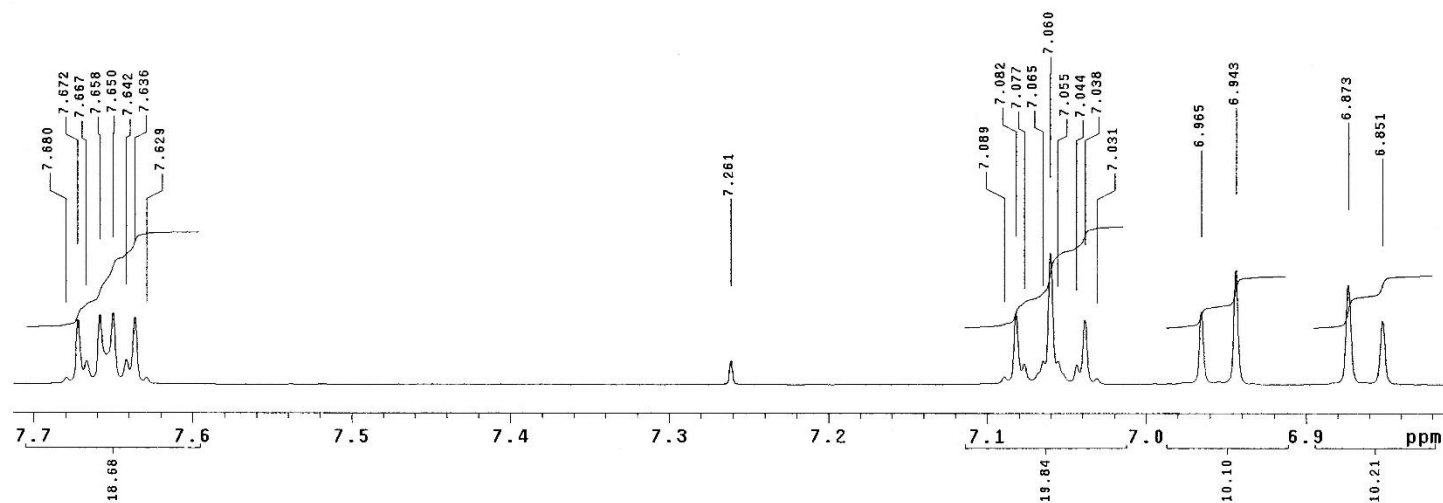

## Compound 1q

YL1040823

Pulse Sequence: s2pul  
UNITYplus-400 "unity400"  
Date: Aug 24 2015  
Solvent: CDCl<sub>3</sub>  
Ambient temperature  
Total 640 repetitions

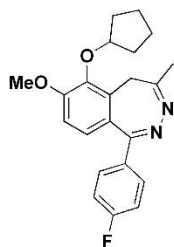

Compound 1q  
<sup>13</sup>C NMR (100 MHz, CDCl<sub>3</sub>) spectra

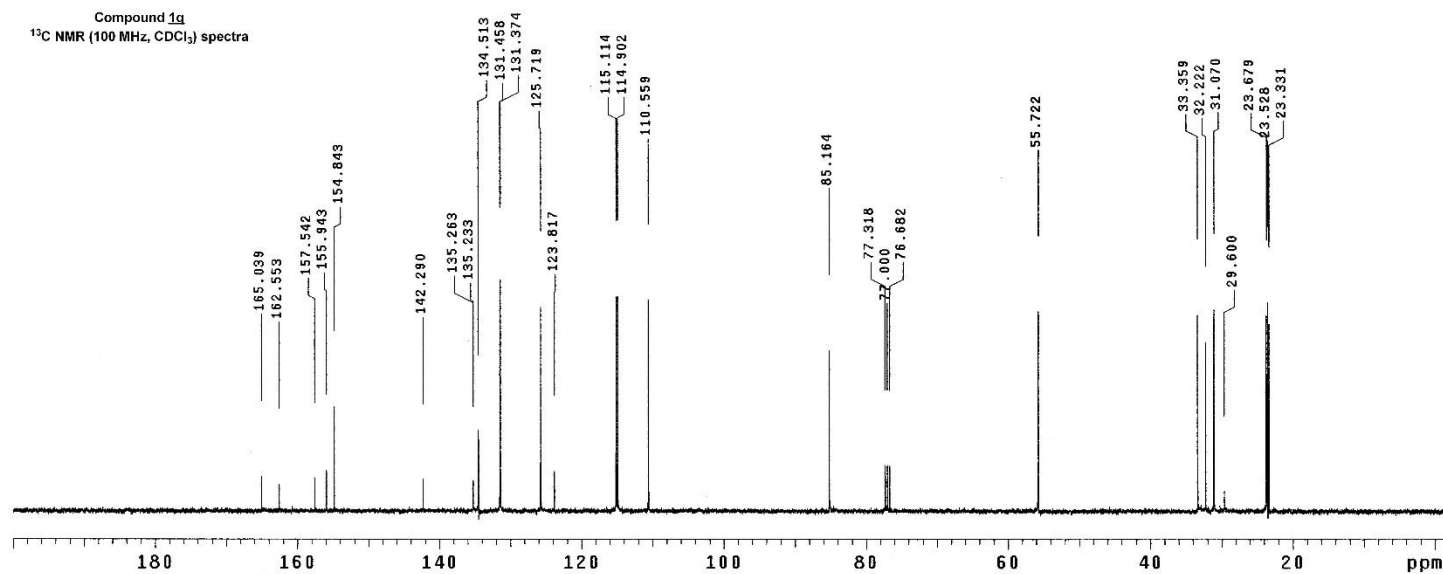

## Compound 1r

YL1040833

Pulse Sequence: s2pu1  
UNITYplus-400 "unity400"  
Date: Sep 2 2015  
Solvent: CDCl<sub>3</sub>  
Ambient temperature  
Total 64 repetitions

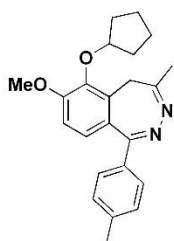

Compound 1r  
<sup>1</sup>H NMR (400 MHz, CDCl<sub>3</sub>) spectra

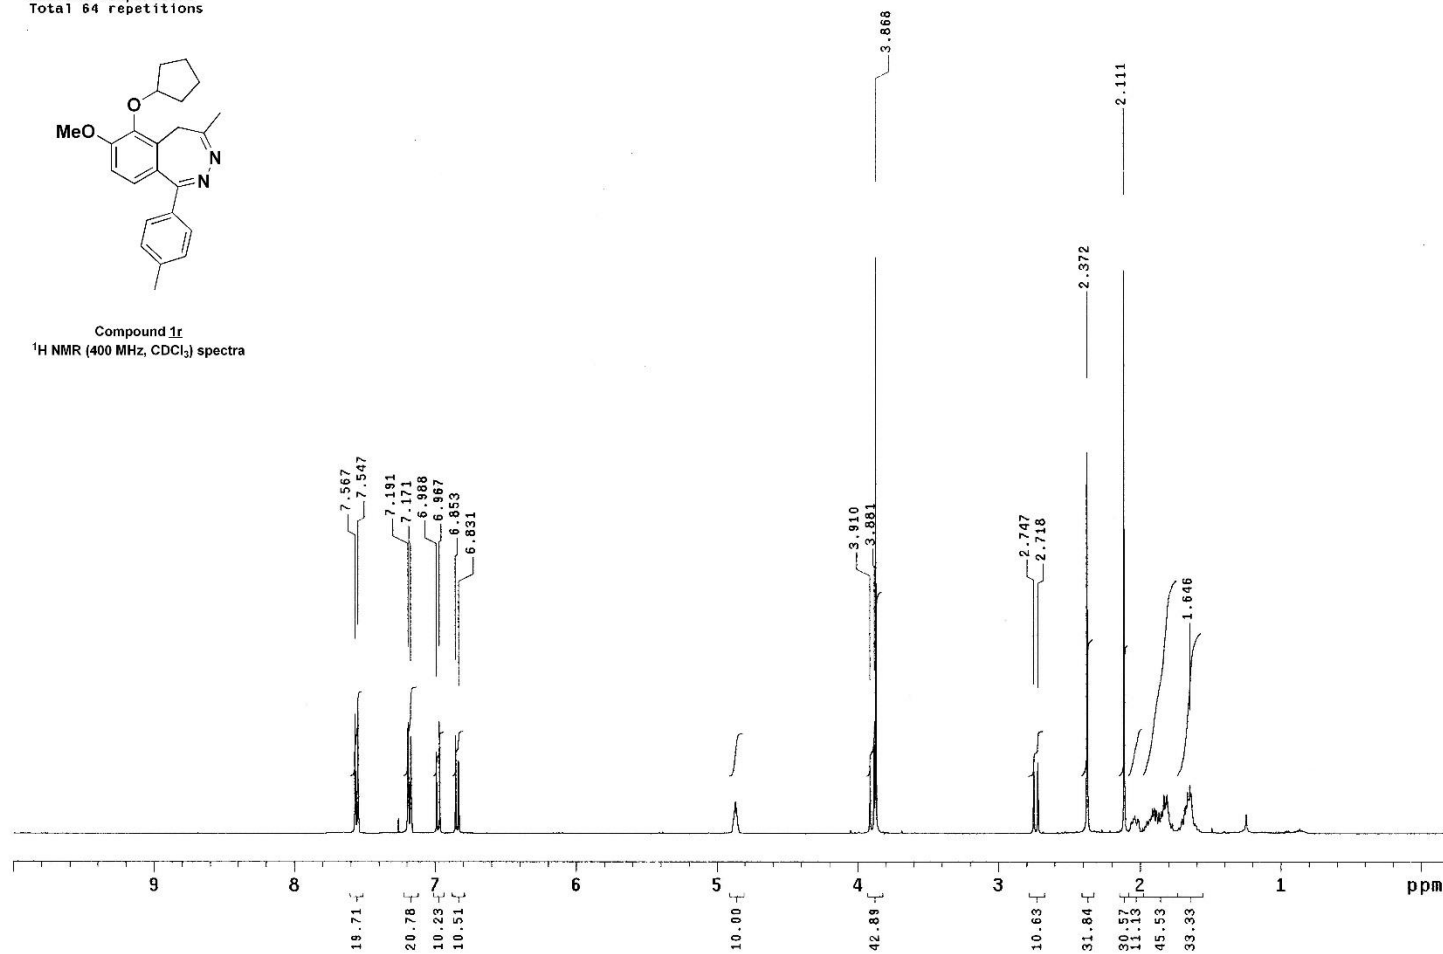

# Compound 1r

YL1040833

Pulse Sequence: s2pu1  
 UNITYplus-400 "unity400"  
 Date: Sep 2 2015  
 Solvent: CDCl3  
 Ambient temperature  
 Total 64 repetitions

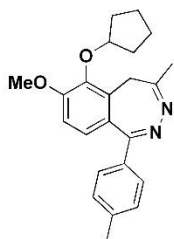

Compound 1r  
<sup>1</sup>H NMR (400 MHz, CDCl<sub>3</sub>) spectra

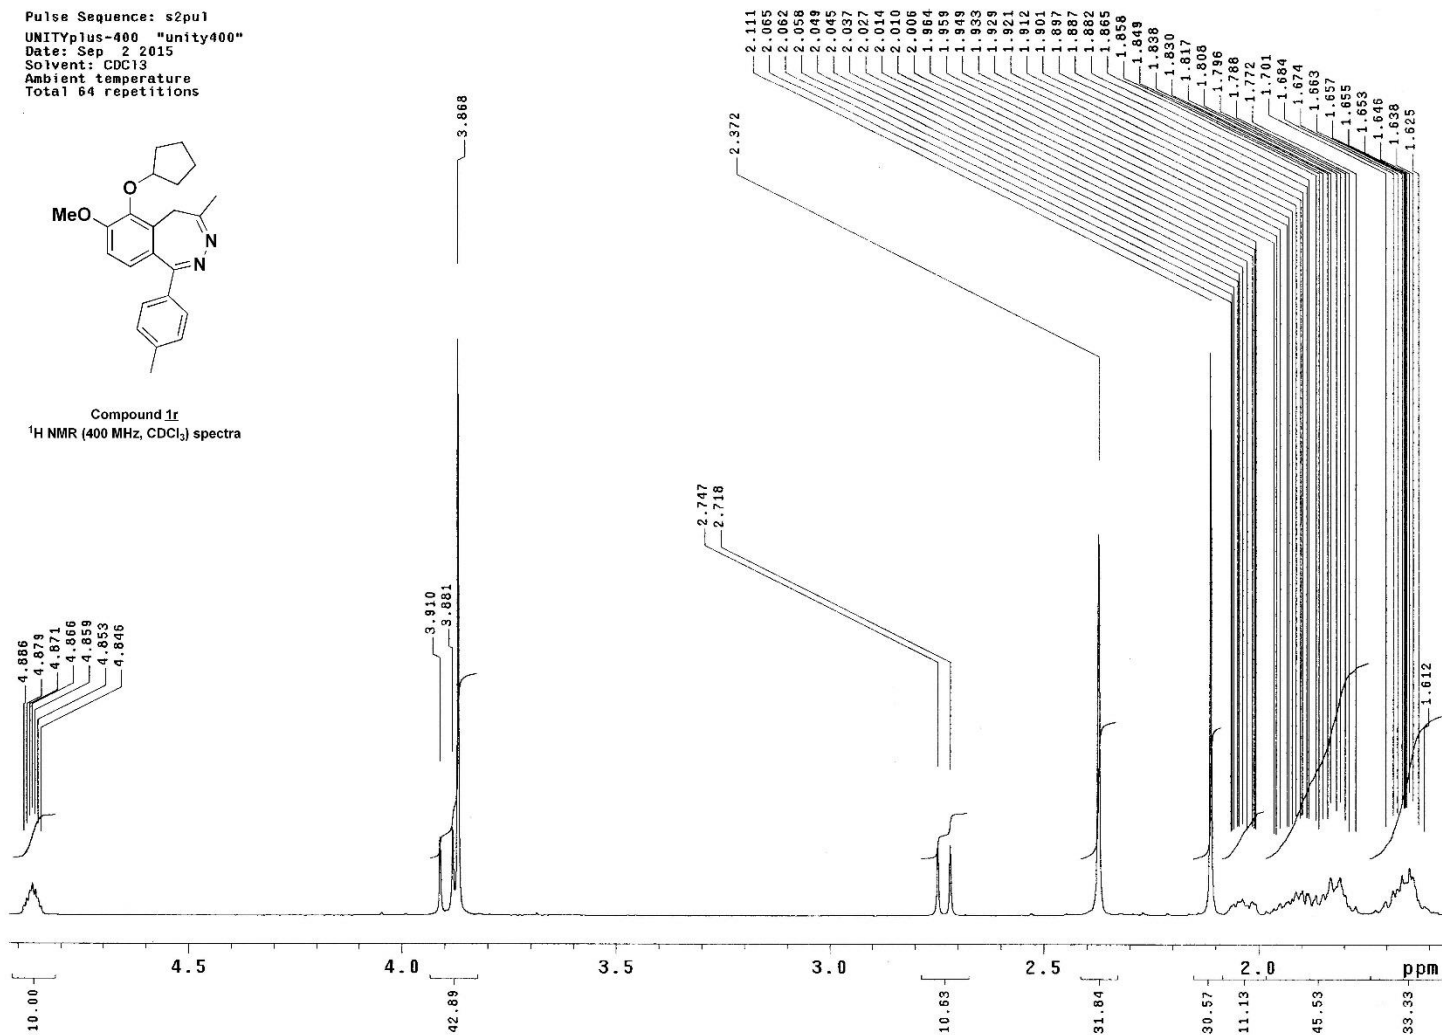



## Compound 1r

YL1040833

Pulse Sequence: s2pu1

UNITYplus-400 "unity400"

Date: Sep 2 2015

Solvent: CDCl<sub>3</sub>

Ambient temperature

Total 320 repetitions

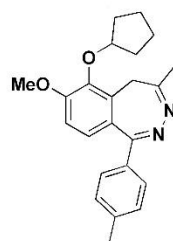

Compound 1r

<sup>13</sup>C NMR (100 MHz, CDCl<sub>3</sub>) spectra

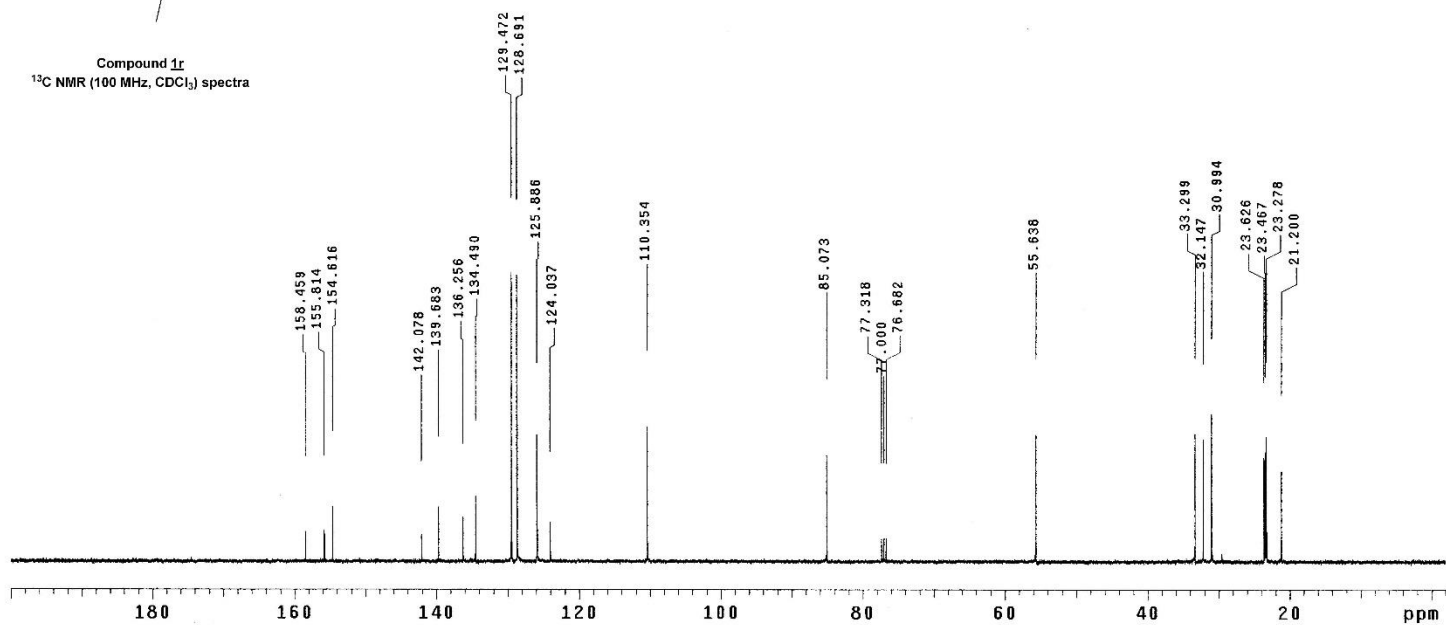

## Compound 1s

YL1040827

Pulse Sequence: s2pu1

UNITYplus-400 "unity400"

Date: Aug 26 2015

Solvent: CDCl<sub>3</sub>

Ambient temperature

Total 64 repetitions

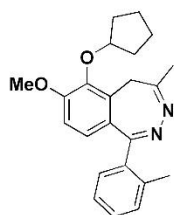

Compound **1s**

<sup>1</sup>H NMR (400 MHz, CDCl<sub>3</sub>) spectra

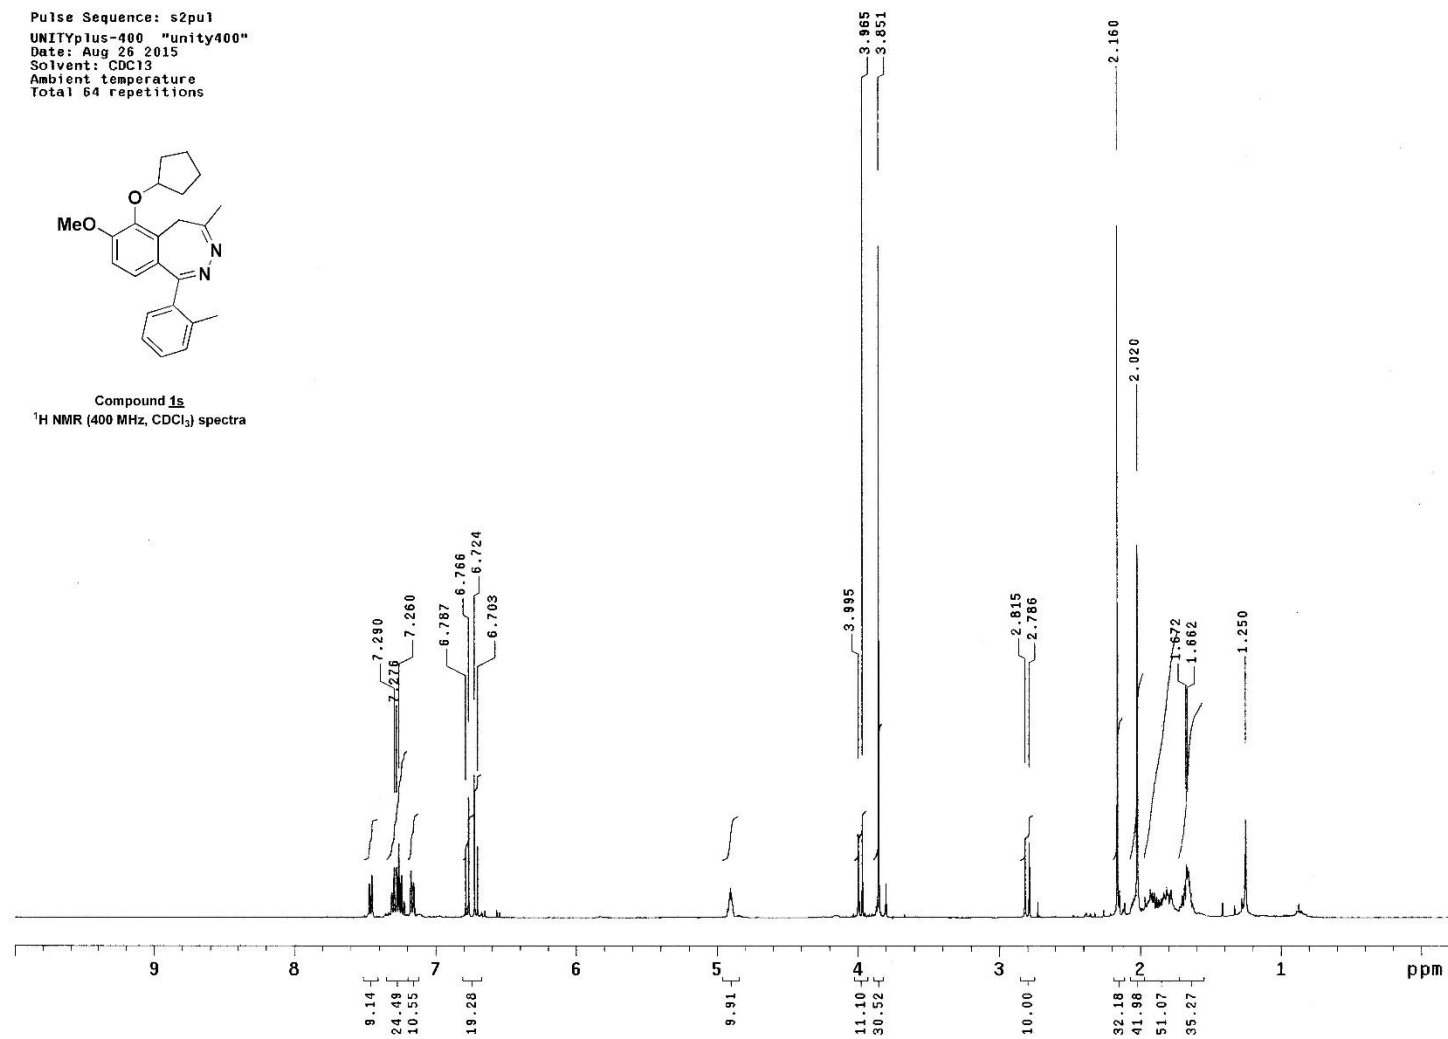

# Compound 1s

YL1040827

Pulse Sequence: s2pu1  
 UNITYplus-400 "unity400"  
 Date: Aug 26 2015  
 Solvent: CDCl3  
 Ambient temperature  
 Total 64 repetitions



Compound **1s**  
<sup>1</sup>H NMR (400 MHz, CDCl<sub>3</sub>) spectra

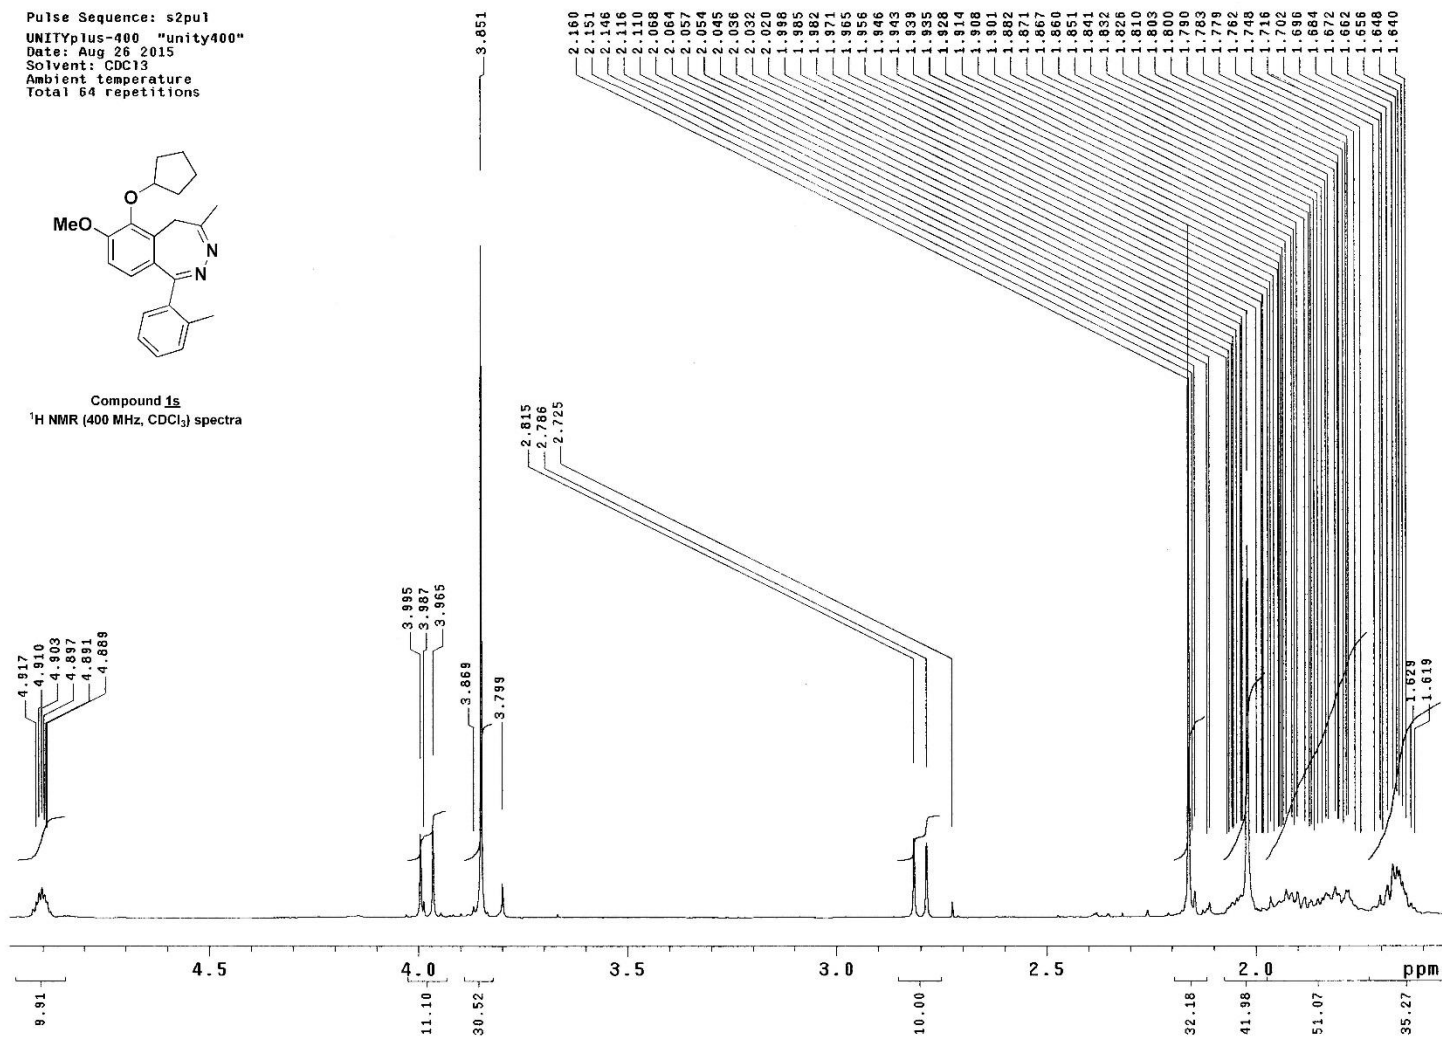

## Compound 1s

YL1040827

Pulse Sequence: s2pu1

UNITYplus-400 "unity400"

Date: Aug 26 2015

Solvent: CDCl<sub>3</sub>

Ambient temperature

Total 64 repetitions

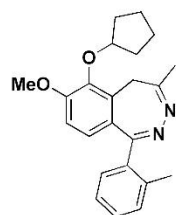

Compound **1s**

<sup>1</sup>H NMR (400 MHz, CDCl<sub>3</sub>) spectra

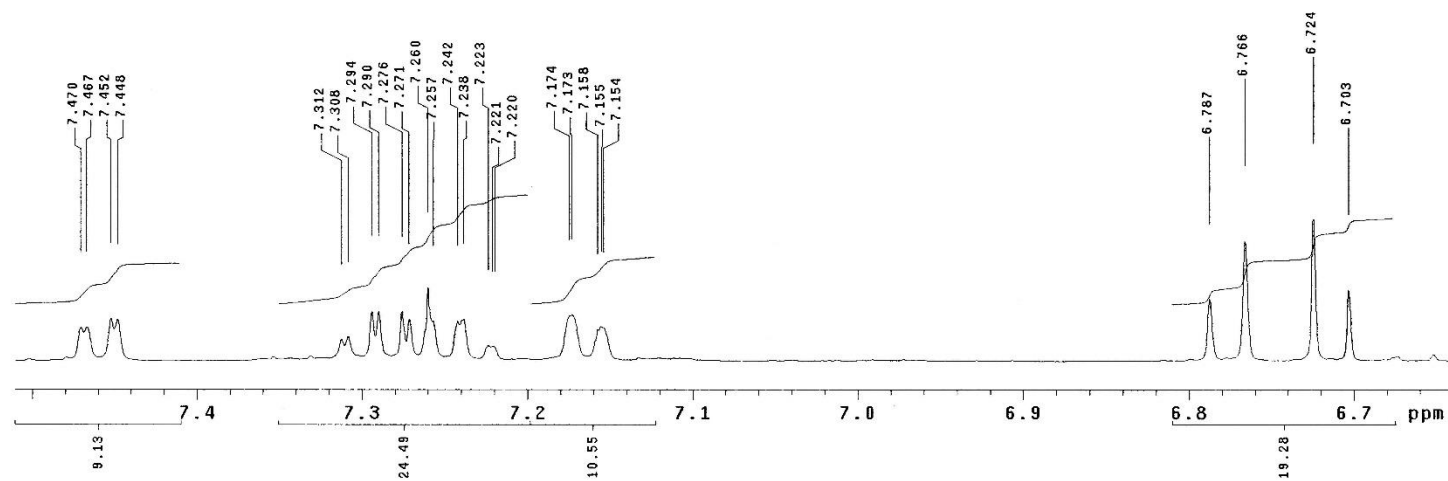

## Compound 1s

YL1040827

Pulse Sequence: s2pu1

UNITYplus-400 "unity400"

Date: Aug 26 2015

Solvent: CDCl<sub>3</sub>

Ambient temperature

Total 944 repetitions

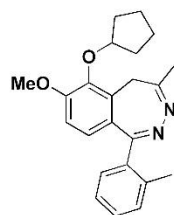

Compound **1s**

<sup>13</sup>C NMR (100 MHz, CDCl<sub>3</sub>) spectra

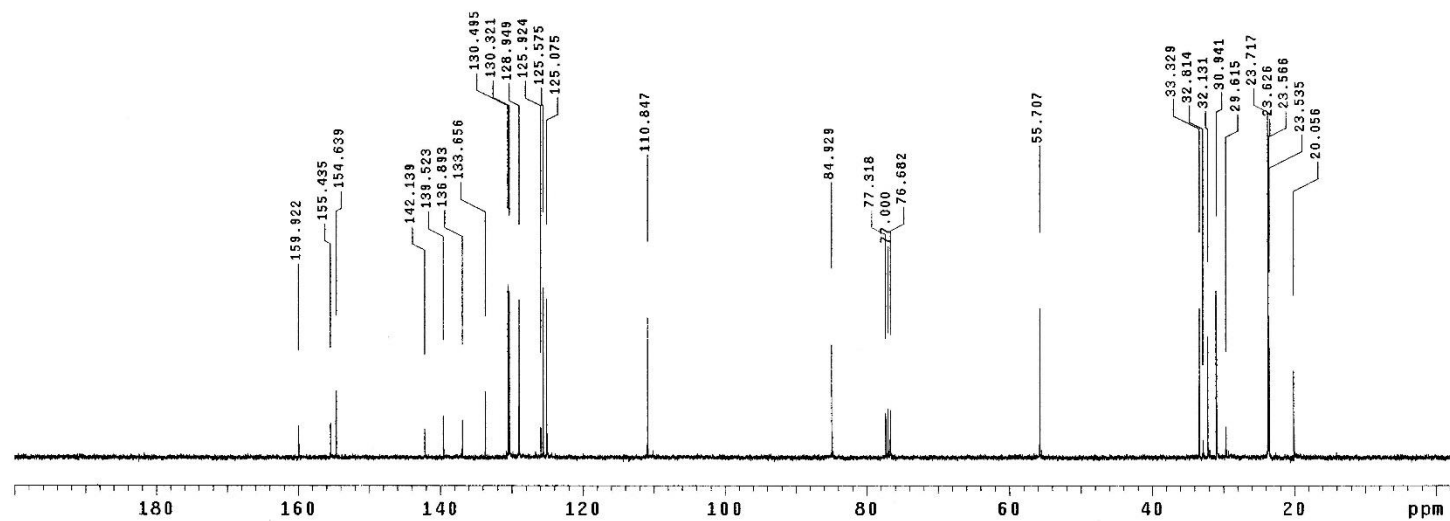

## Compound 1s

YL1040827

Pulse Sequence: s2pu1

UNITYplus-400 "unity400"

Date: Aug 26 2015

Solvent: CDCl<sub>3</sub>

Ambient temperature

Total 944 repetitions



Compound **1s**

<sup>13</sup>C NMR (100 MHz, CDCl<sub>3</sub>) spectra

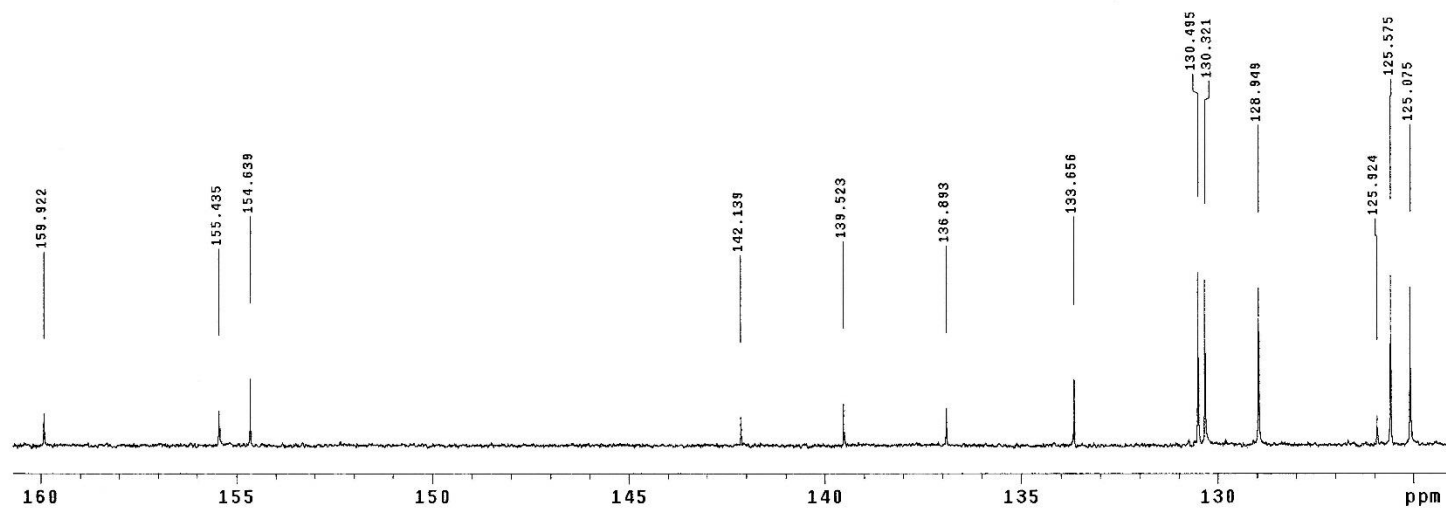

## Compound 1t

YL1040829

Pulse Sequence: s2pu1  
UNITYplus-400 "unity400"  
Date: Aug 31 2015  
Solvent: CDCl<sub>3</sub>  
Ambient temperature  
Total 64 repetitions

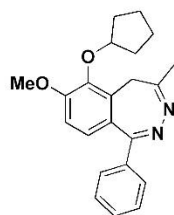

Compound 1t  
<sup>1</sup>H NMR (400 MHz, CDCl<sub>3</sub>) spectra

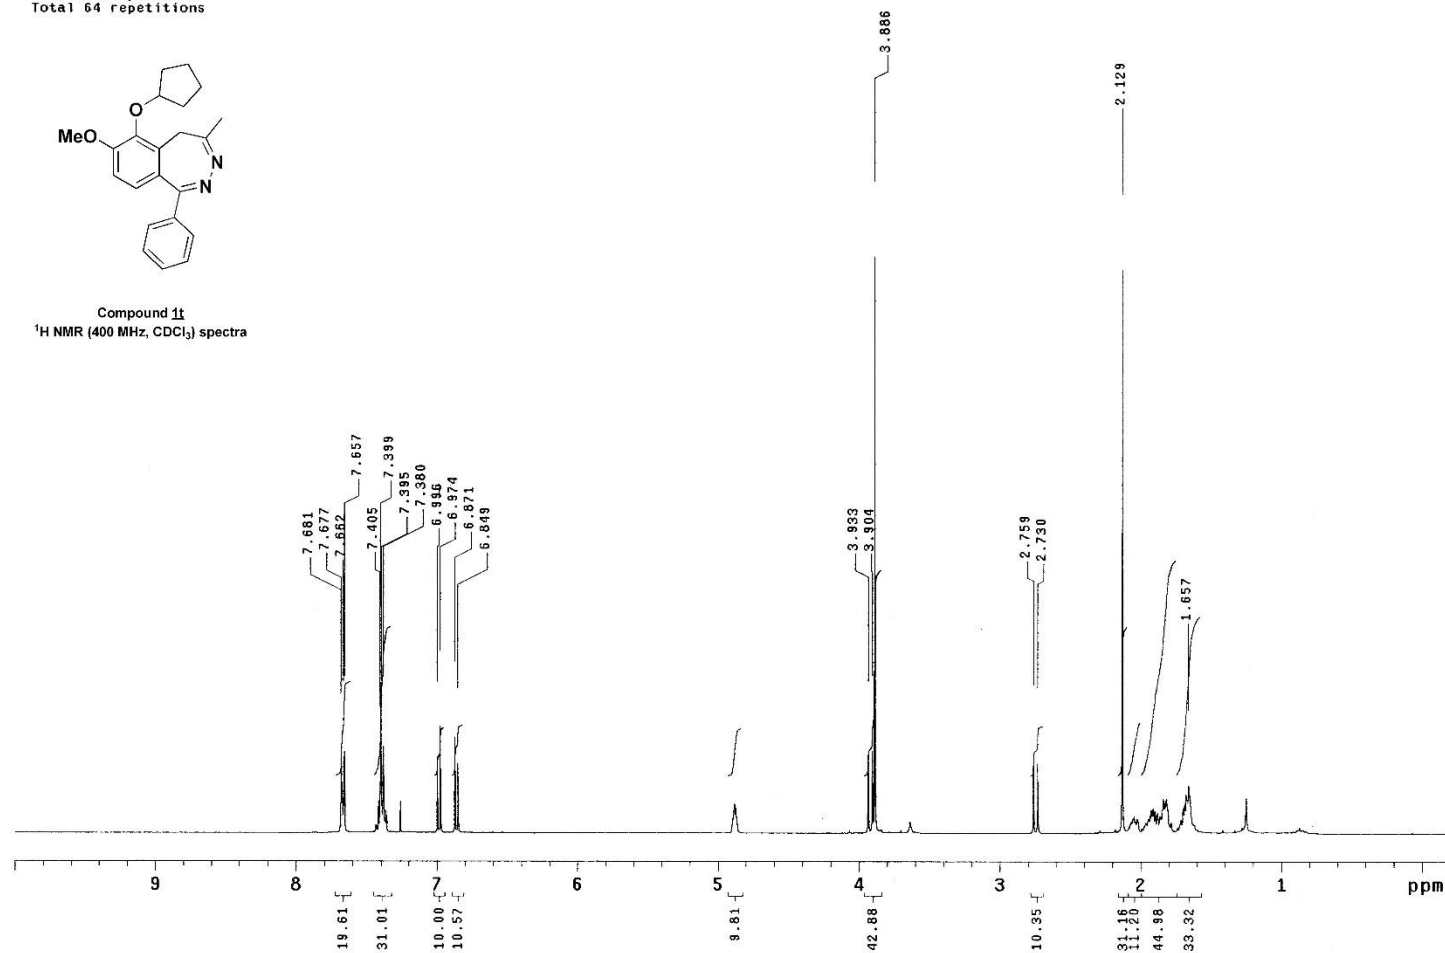

# Compound 1t

YL1040829

Pulse Sequence: s2pul  
 UNITYplus-400 "unity400"  
 Date: Aug 31 2015  
 Solvent: CDCl<sub>3</sub>  
 Ambient temperature  
 Total 64 repetitions

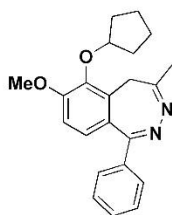

Compound 1t  
<sup>1</sup>H NMR (400 MHz, CDCl<sub>3</sub>) spectra

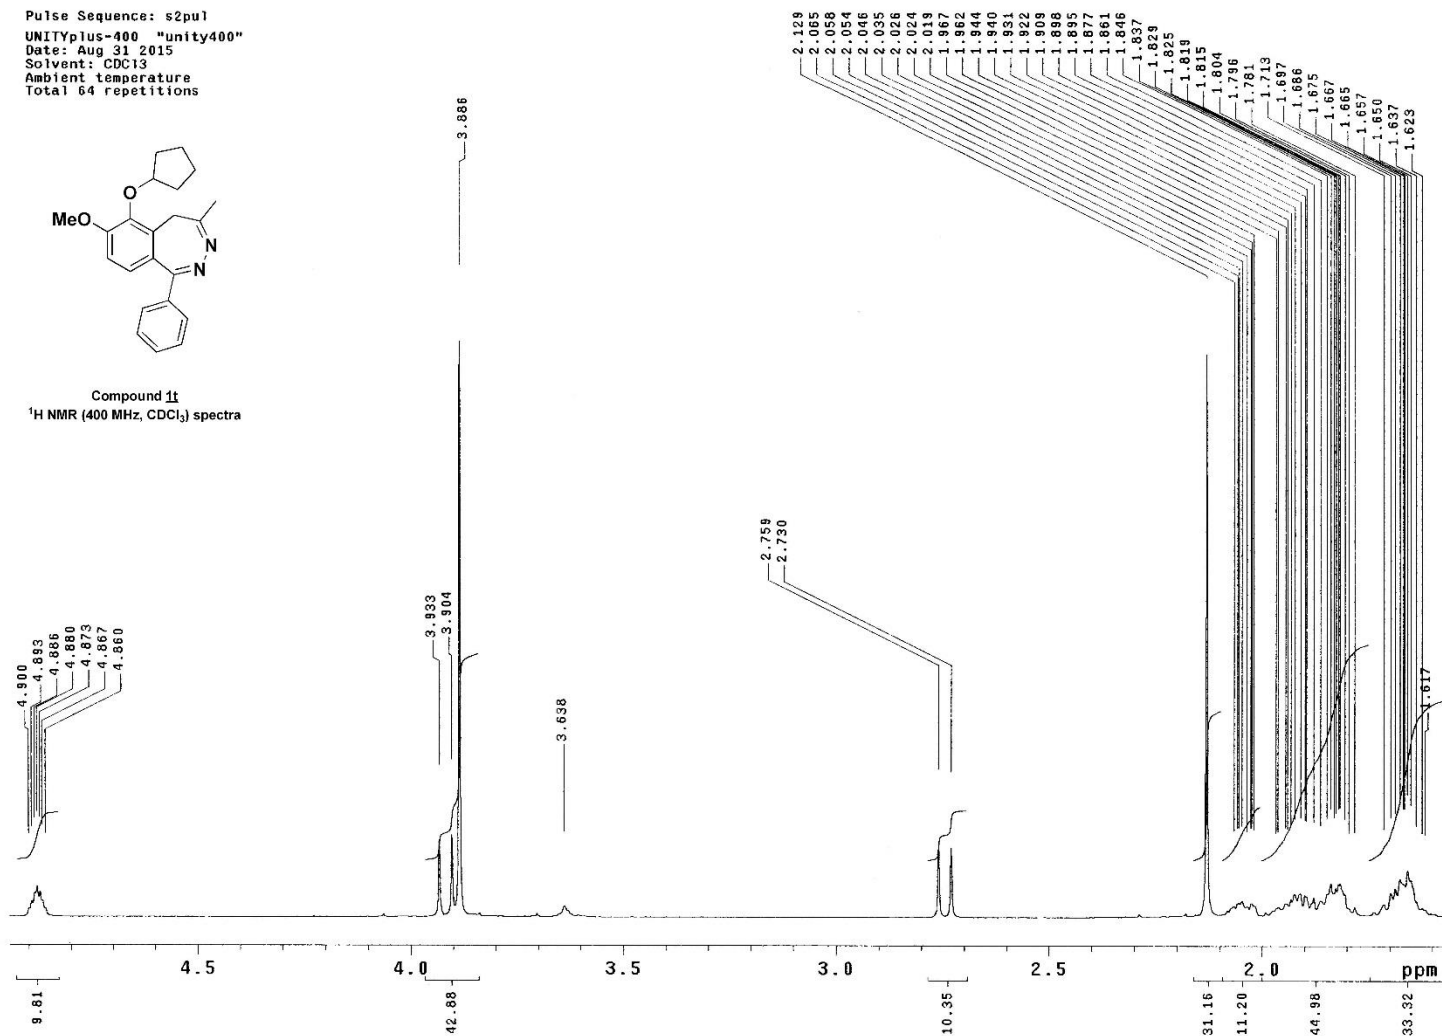



## Compound 1t

YL1040829

Pulse Sequence: s2pu1  
UNITYplus-400 "unity400"  
Date: Aug 31 2015  
Solvent: CDCl<sub>3</sub>  
Ambient temperature  
Total 64 repetitions



Compound 1t  
<sup>1</sup>H NMR (400 MHz, CDCl<sub>3</sub>) spectra

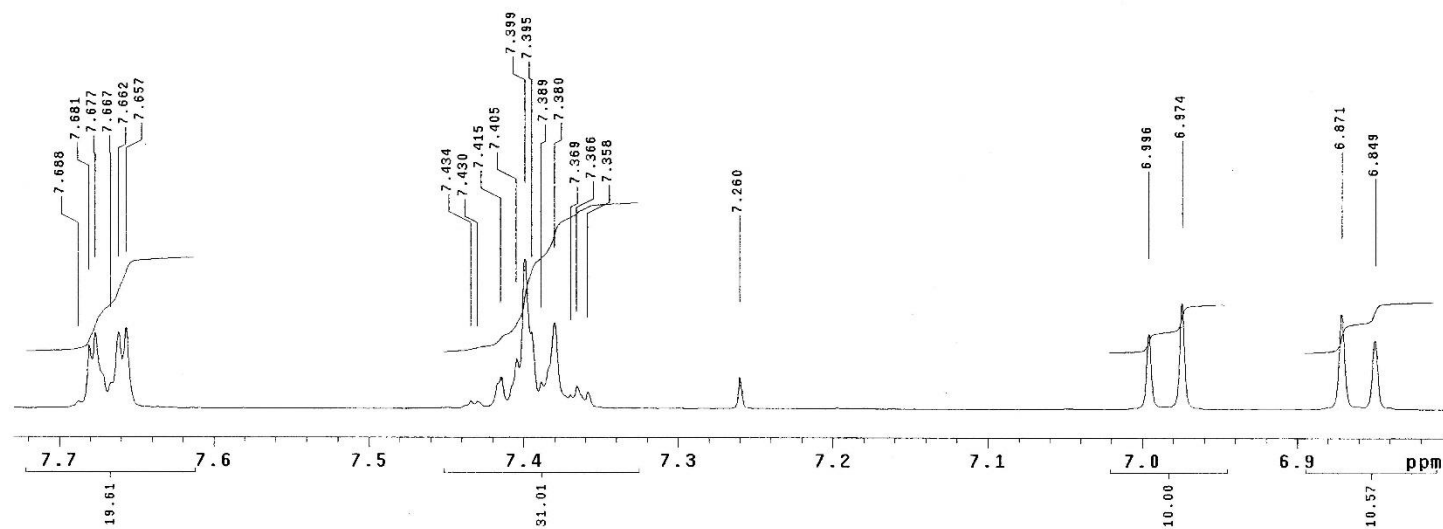

## Compound 1t

YL1040829

Pulse Sequence: s2pul  
UNITYplus-400 "unity400"  
Date: Aug 31 2015  
Solvent: CDCl<sub>3</sub>  
Ambient temperature  
Total 800 repetitions

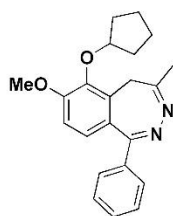

Compound 1t

<sup>13</sup>C NMR (100 MHz, CDCl<sub>3</sub>) spectra

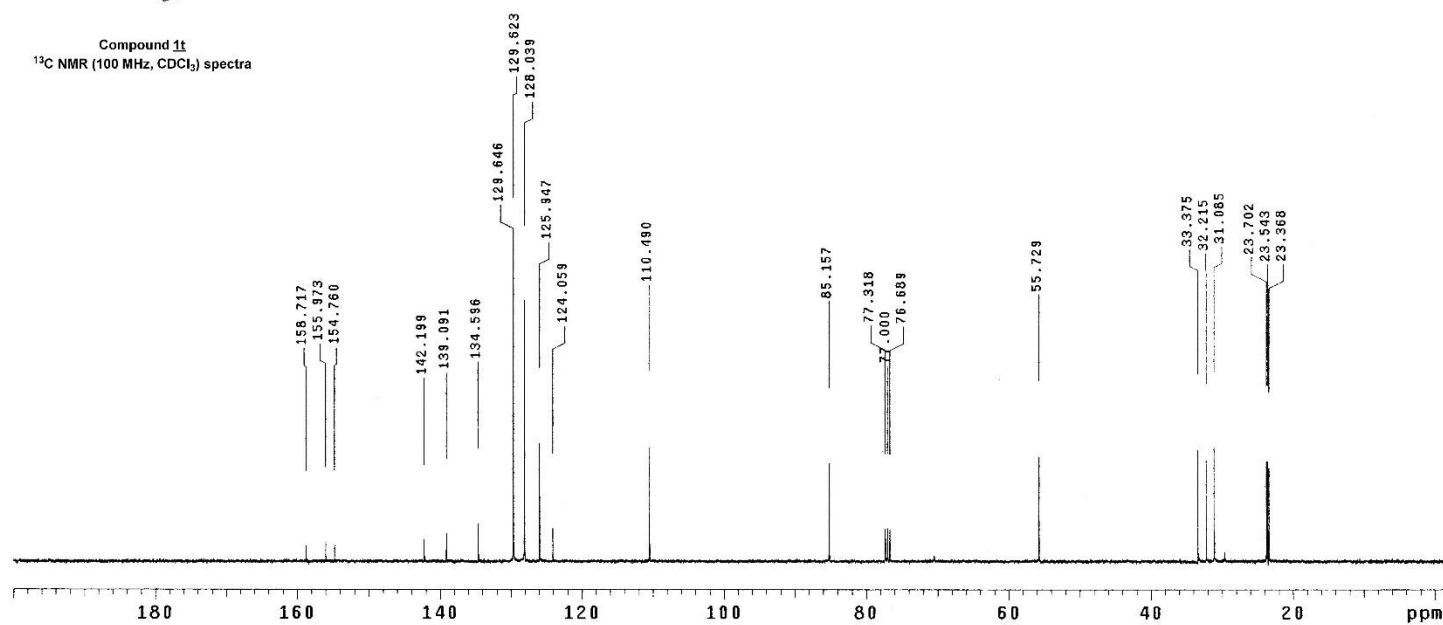

## Compound 1u

YL1040814

Pulse Sequence: s2pu1  
UNITYplus-400 "unity400"  
Date: Aug 20 2015  
Solvent: CDCl<sub>3</sub>  
Ambient temperature  
Total 32 repetitions

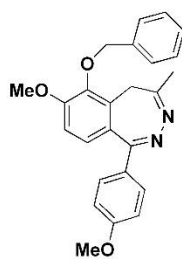

Compound 1u

<sup>1</sup>H NMR (400 MHz, CDCl<sub>3</sub>) spectra

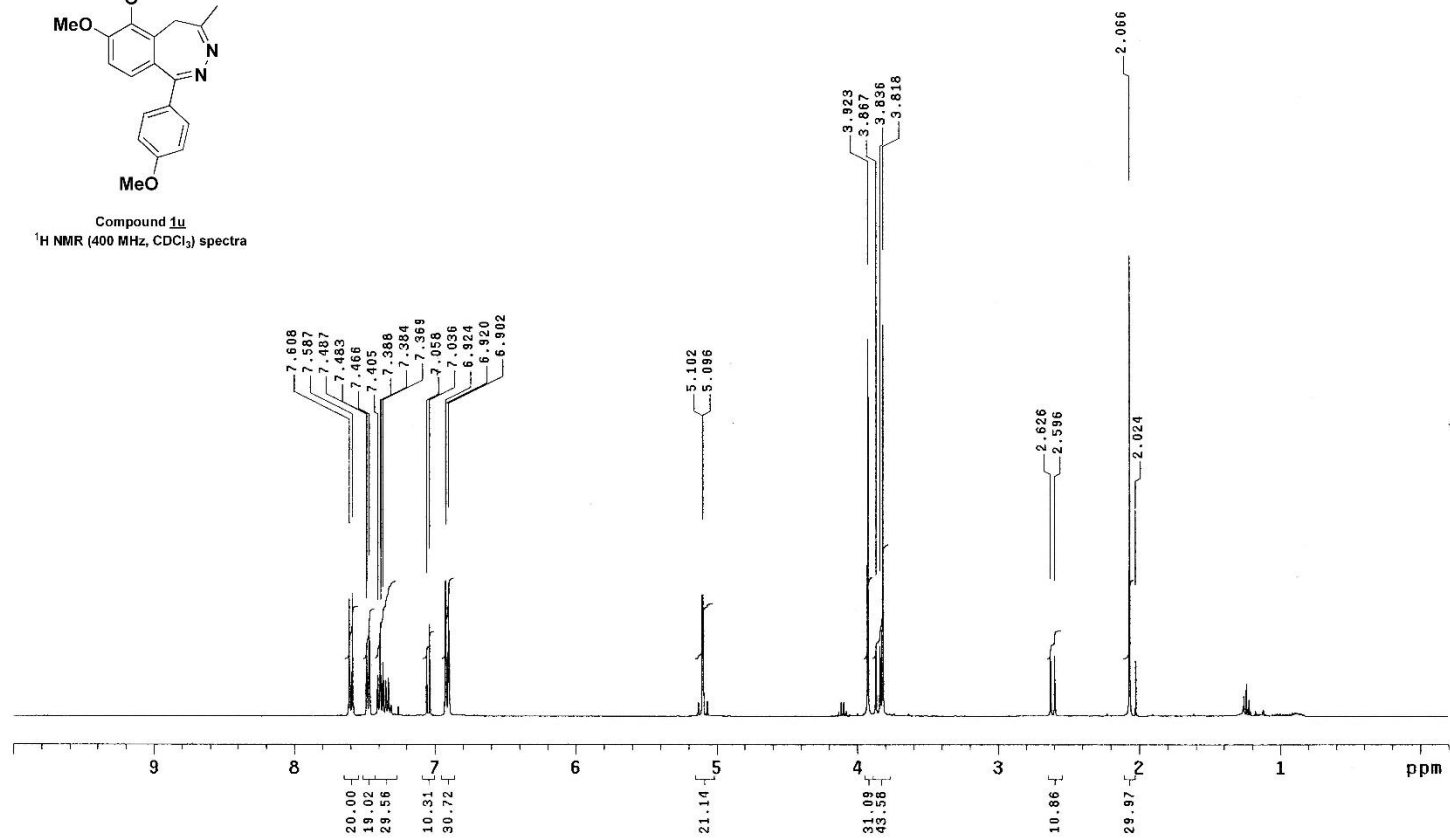

## Compound 1u

YL1040814

Pulse Sequence: s2pu1  
UNITYplus-400 "unity400"  
Date: Aug 20 2015  
Solvent: CDCl<sub>3</sub>  
Ambient temperature  
Total 32 repetitions

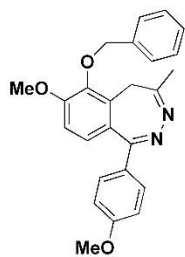

Compound 1u

<sup>1</sup>H NMR (400 MHz, CDCl<sub>3</sub>) spectra

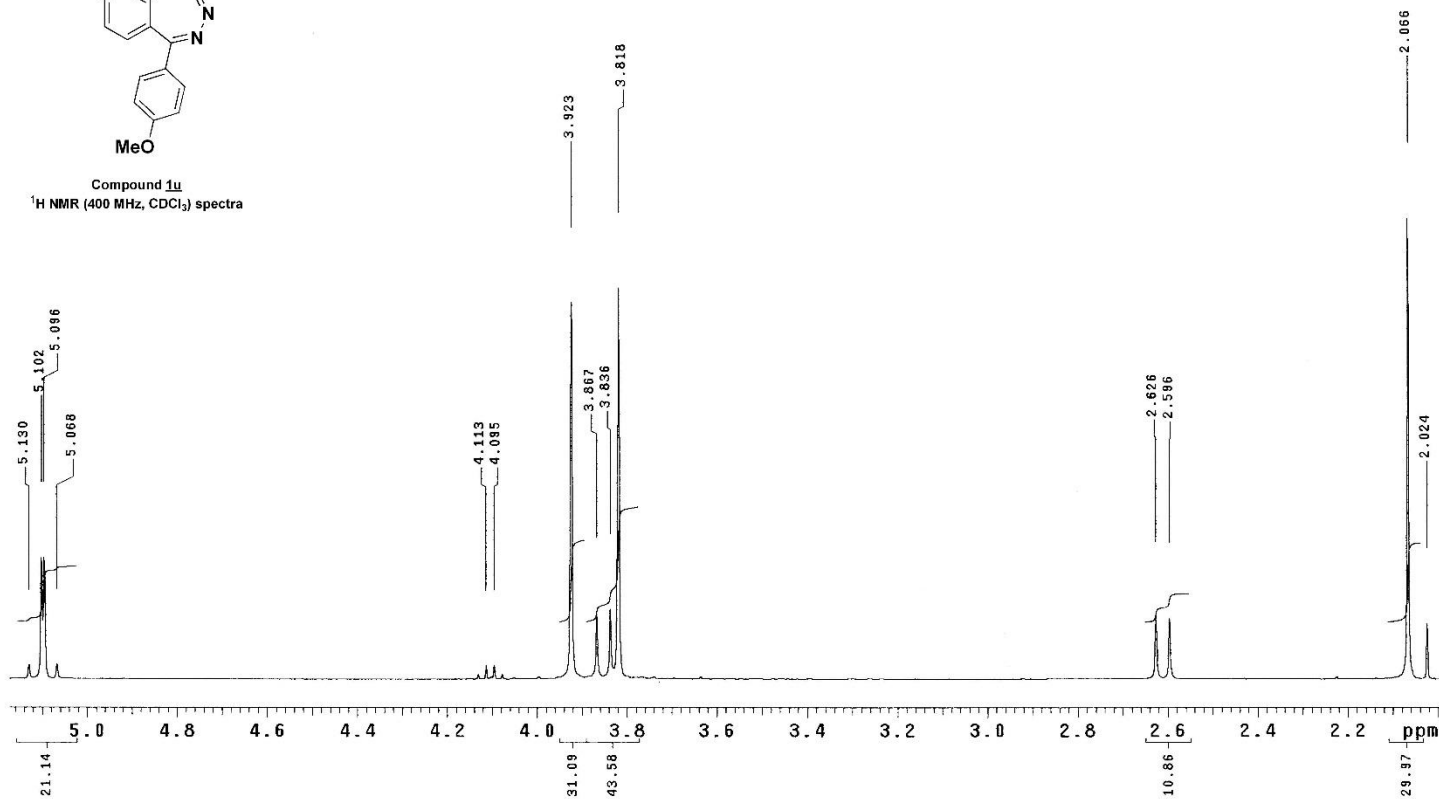

## Compound 1u

YL1040814

Pulse Sequence: s2pu1  
UNITYplus-400 "unity400"  
Date: Aug 20 2015  
Solvent: CDCl<sub>3</sub>  
Ambient temperature  
Total 32 repetitions



Compound 1u

<sup>1</sup>H NMR (400 MHz, CDCl<sub>3</sub>) spectra

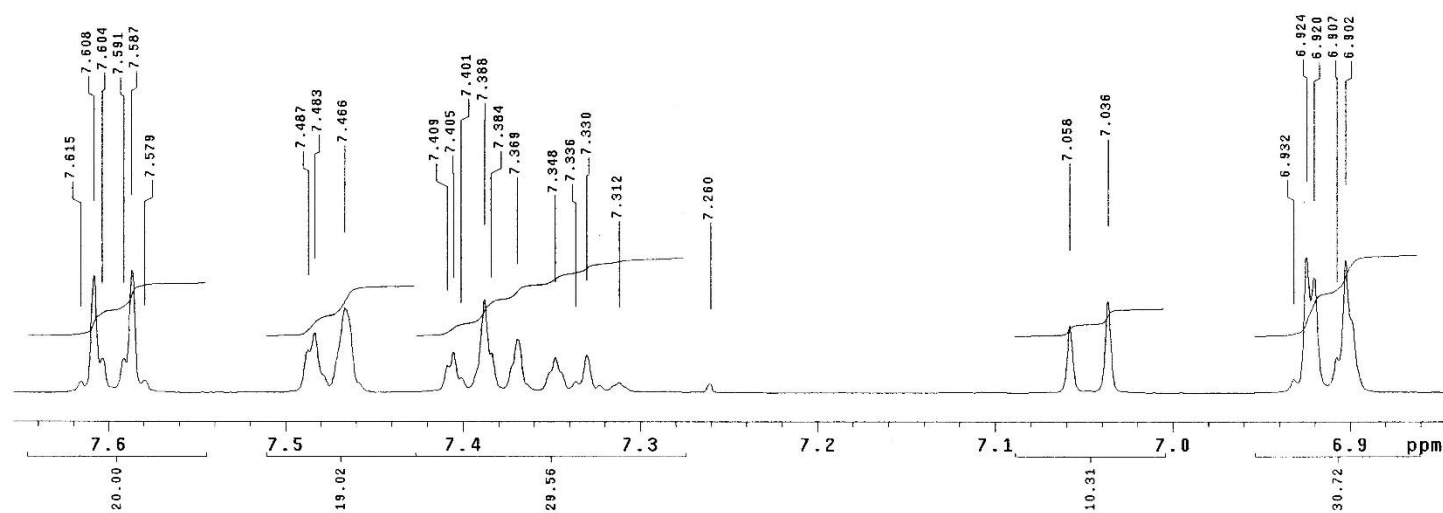

## Compound 1u

YL1040814

Pulse Sequence: s2pul

UNITYplus-400 "unity400"

Date: Aug 20 2015

Solvent: CDCl<sub>3</sub>

Ambient temperature

Total 208 repetitions

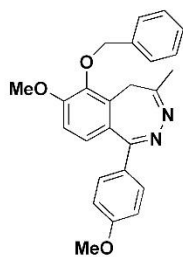

Compound **1u**

<sup>13</sup>C NMR (100 MHz, CDCl<sub>3</sub>) spectra

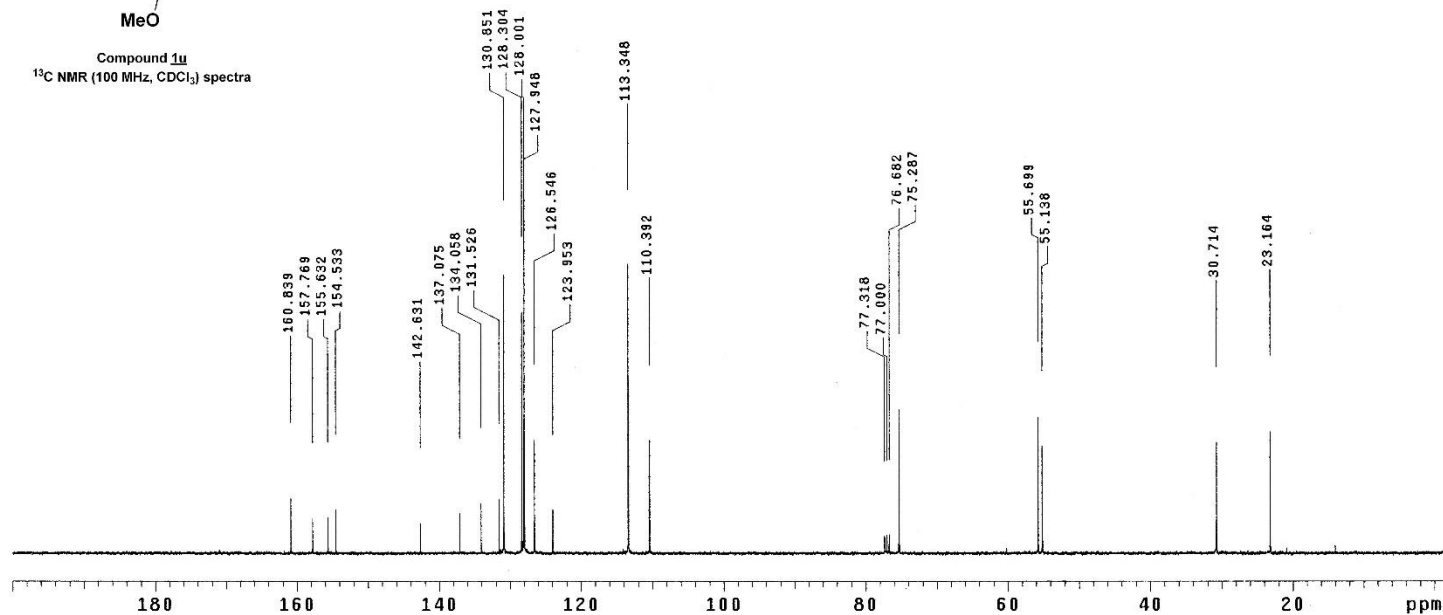

## Compound 1u

YL1040814

Pulse Sequence: s2pul  
UNITYplus-400 "unity400"  
Date: Aug 20 2015  
Solvent: CDCl<sub>3</sub>  
Ambient temperature  
Total 208 repetitions



Compound 1u

<sup>13</sup>C NMR (100 MHz, CDCl<sub>3</sub>) spectra

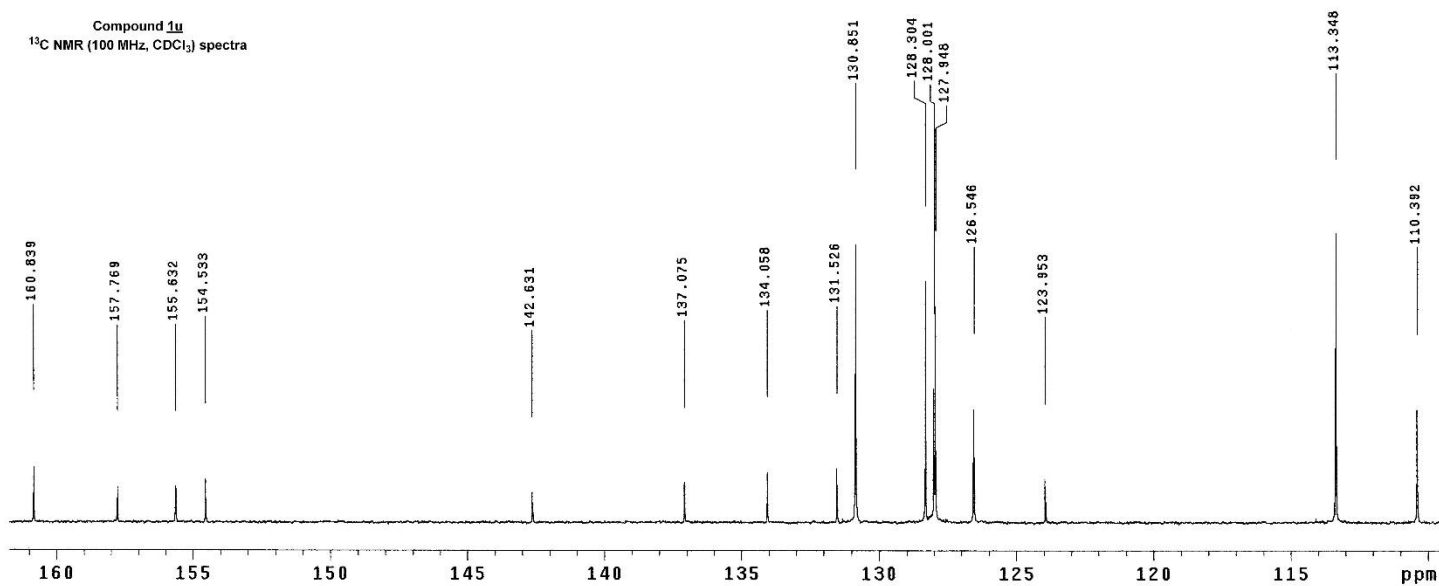

## Compound 1v

YL1040908

Pulse Sequence: s2pu1

UNITYplus-400 "unity400"

Date: Sep 11 2015

Solvent: CDCl<sub>3</sub>

Ambient temperature

Total 64 repetitions

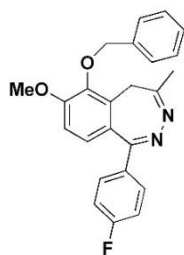

Compound 1v

<sup>1</sup>H NMR (400 MHz, CDCl<sub>3</sub>) spectra

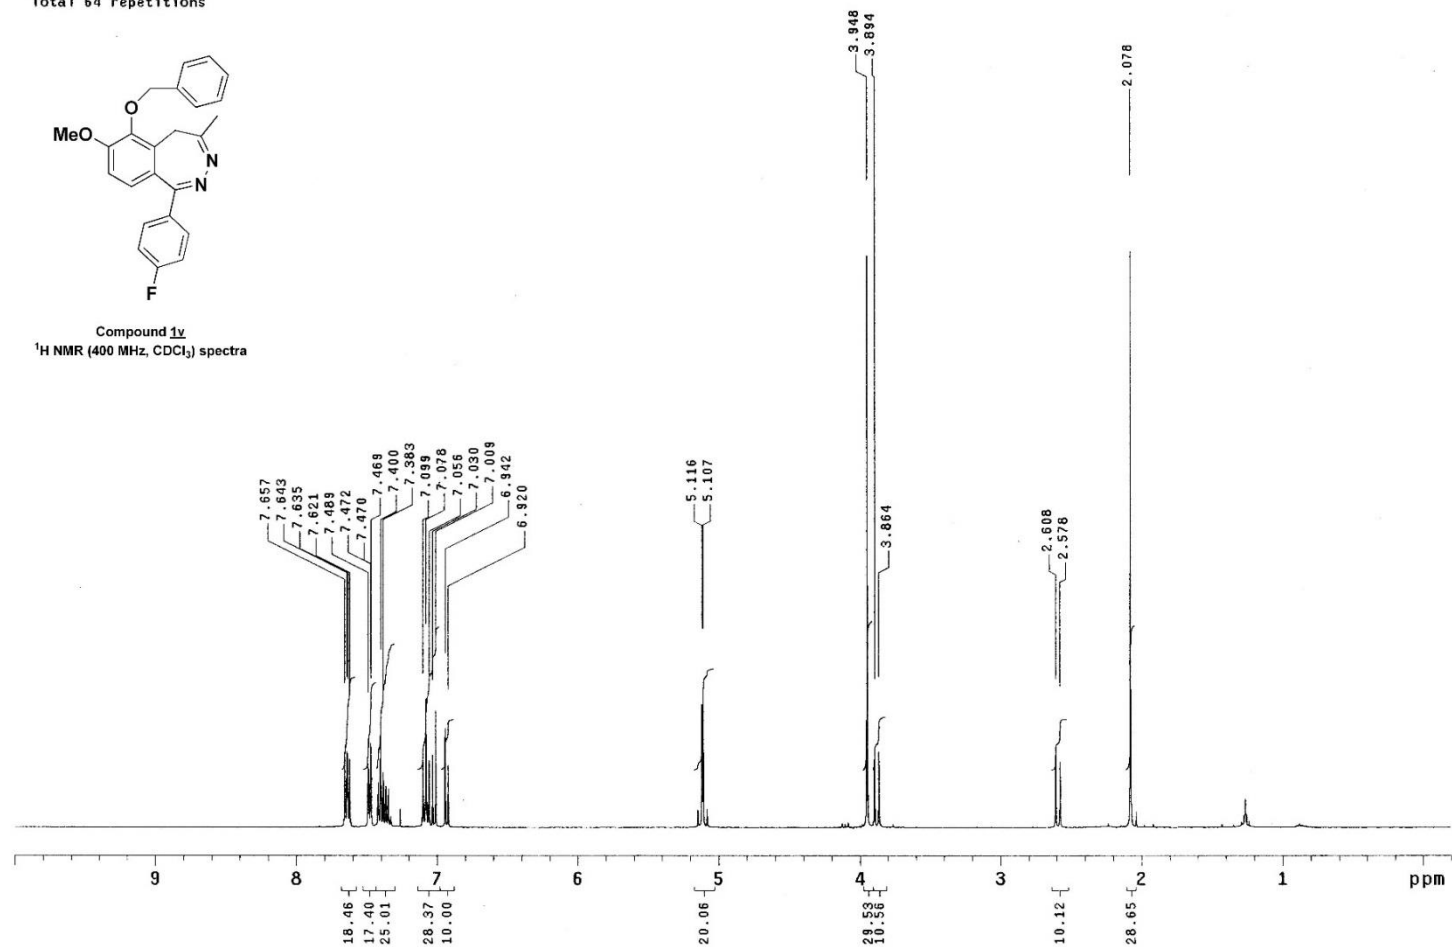



## Compound 1v

YL1040908

Pulse Sequence: s2pu1

UNITYplus-400 "unity400"

Date: Sep 11 2015

Solvent: CDCl<sub>3</sub>

Ambient temperature

Total 64 repetitions

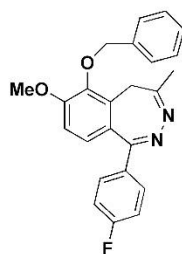

Compound 1v

<sup>1</sup>H NMR (400 MHz, CDCl<sub>3</sub>) spectra

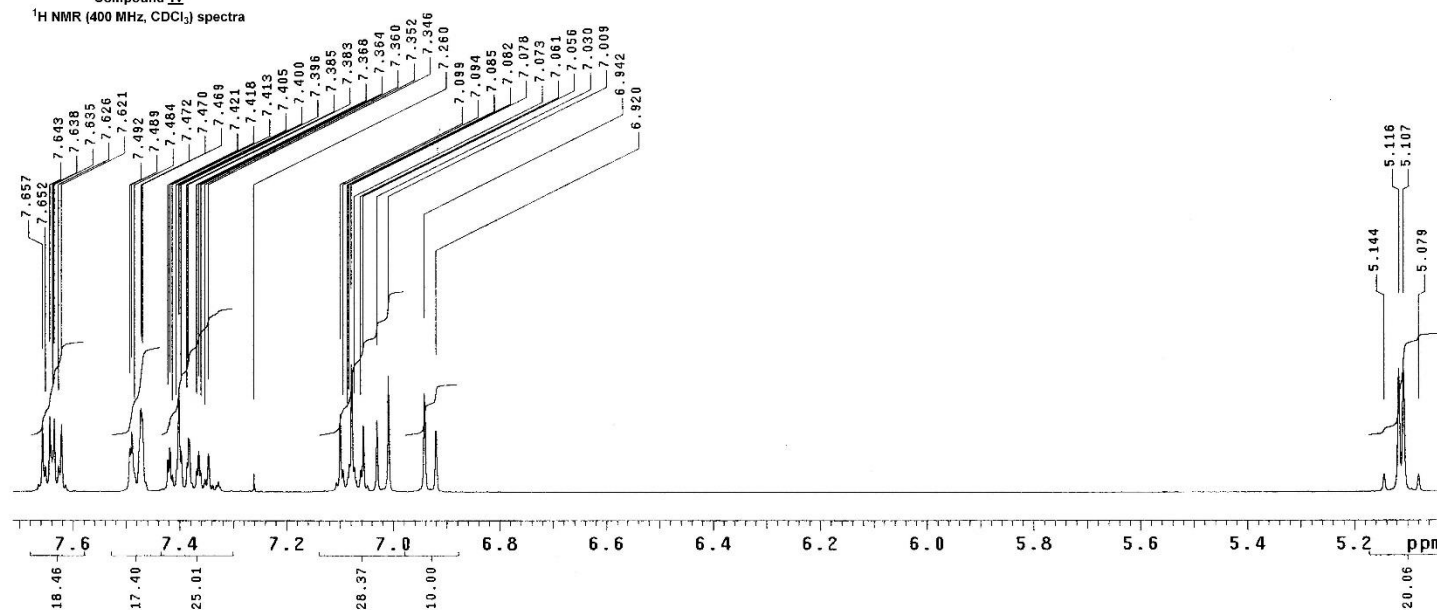

## Compound 1v

YL1040908

Pulse Sequence: s2pul

UNITYplus-400 "unity400"

Date: Sep 11 2015

Solvent: CDCl<sub>3</sub>

Ambient temperature

Total 448 repetitions

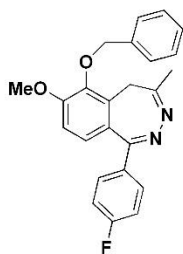

Compound 1v

<sup>13</sup>C NMR (100 MHz, CDCl<sub>3</sub>) spectra

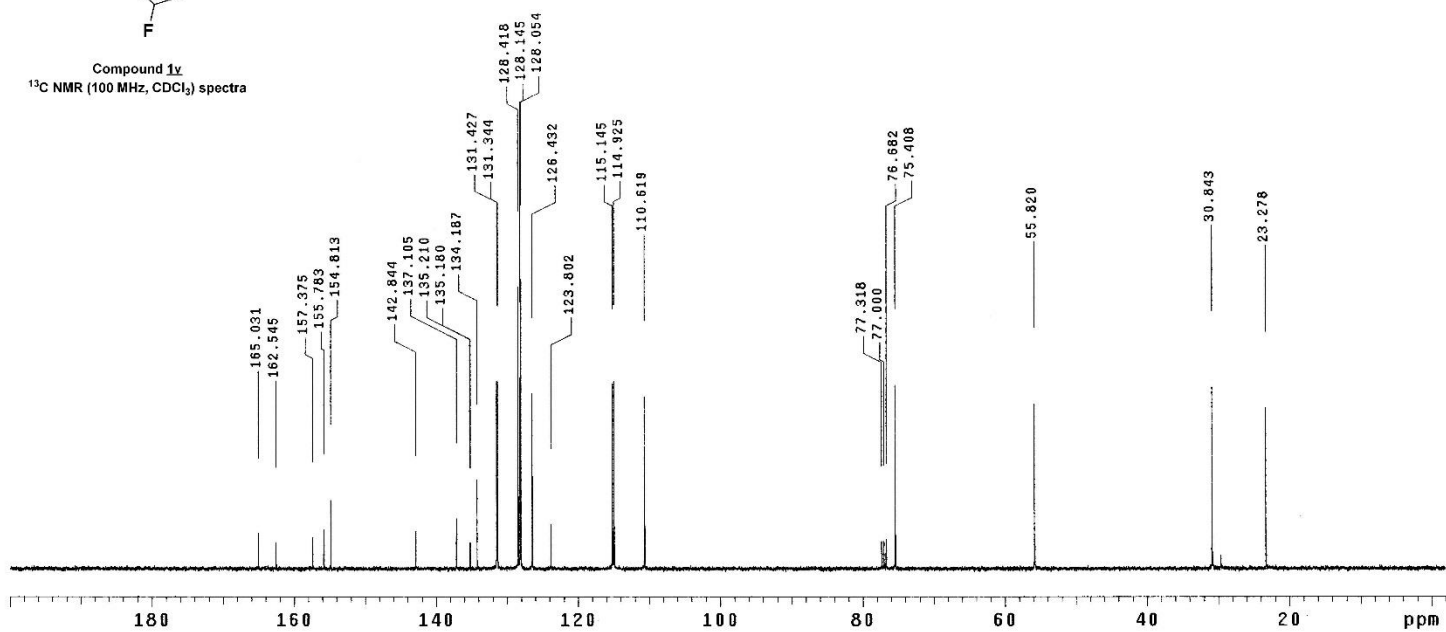

## Compound 1v

YL1040908

Pulse Sequence: s2pu1

UNITYplus-400 "unity400"

Date: Sep 11 2015

Solvent: CDCl<sub>3</sub>

Ambient temperature

Total 448 repetitions

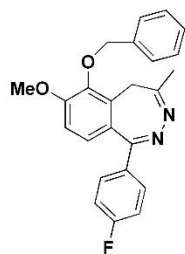

Compound 1v

<sup>13</sup>C NMR (100 MHz, CDCl<sub>3</sub>) spectra

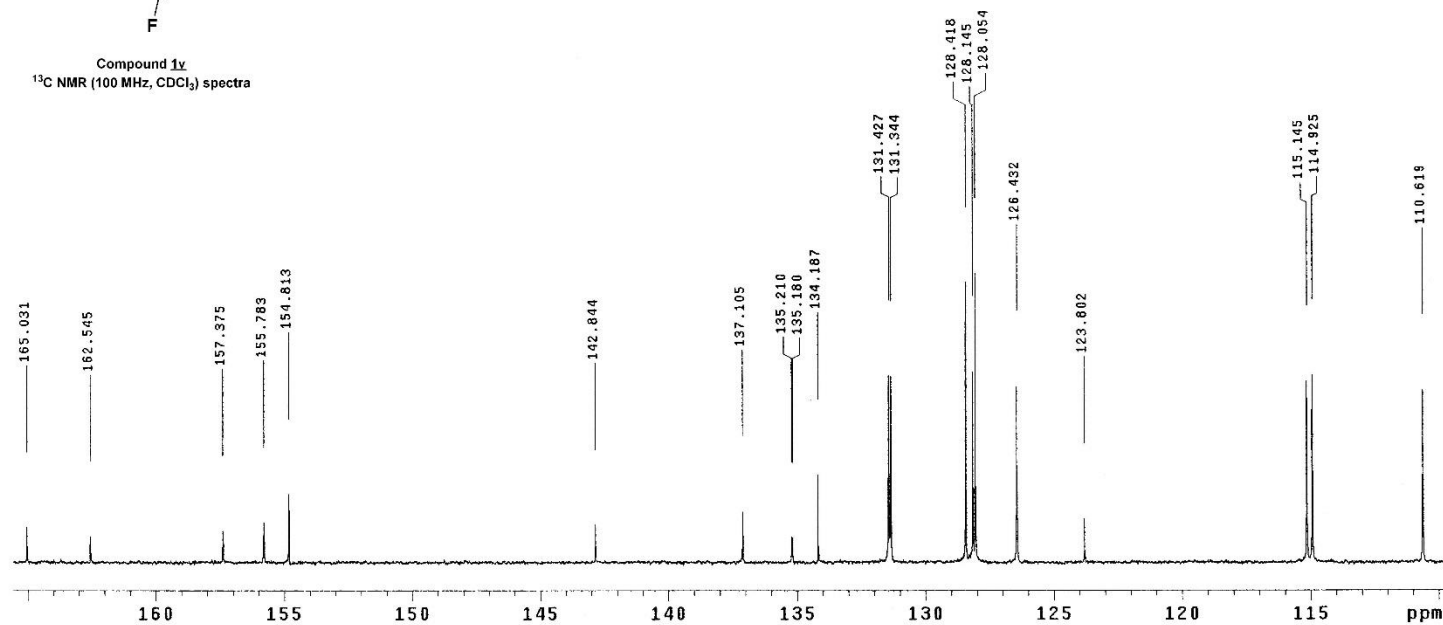

## Compound 1w

YL1040901

Pulse Sequence: s2pul  
UNITYplus-400 "unity400"  
Date: Sep 3 2015  
Solvent: CDCl<sub>3</sub>  
Ambient temperature  
Total 64 repetitions

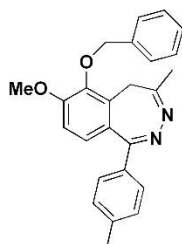

Compound 1w  
<sup>1</sup>H NMR (400 MHz, CDCl<sub>3</sub>) spectra

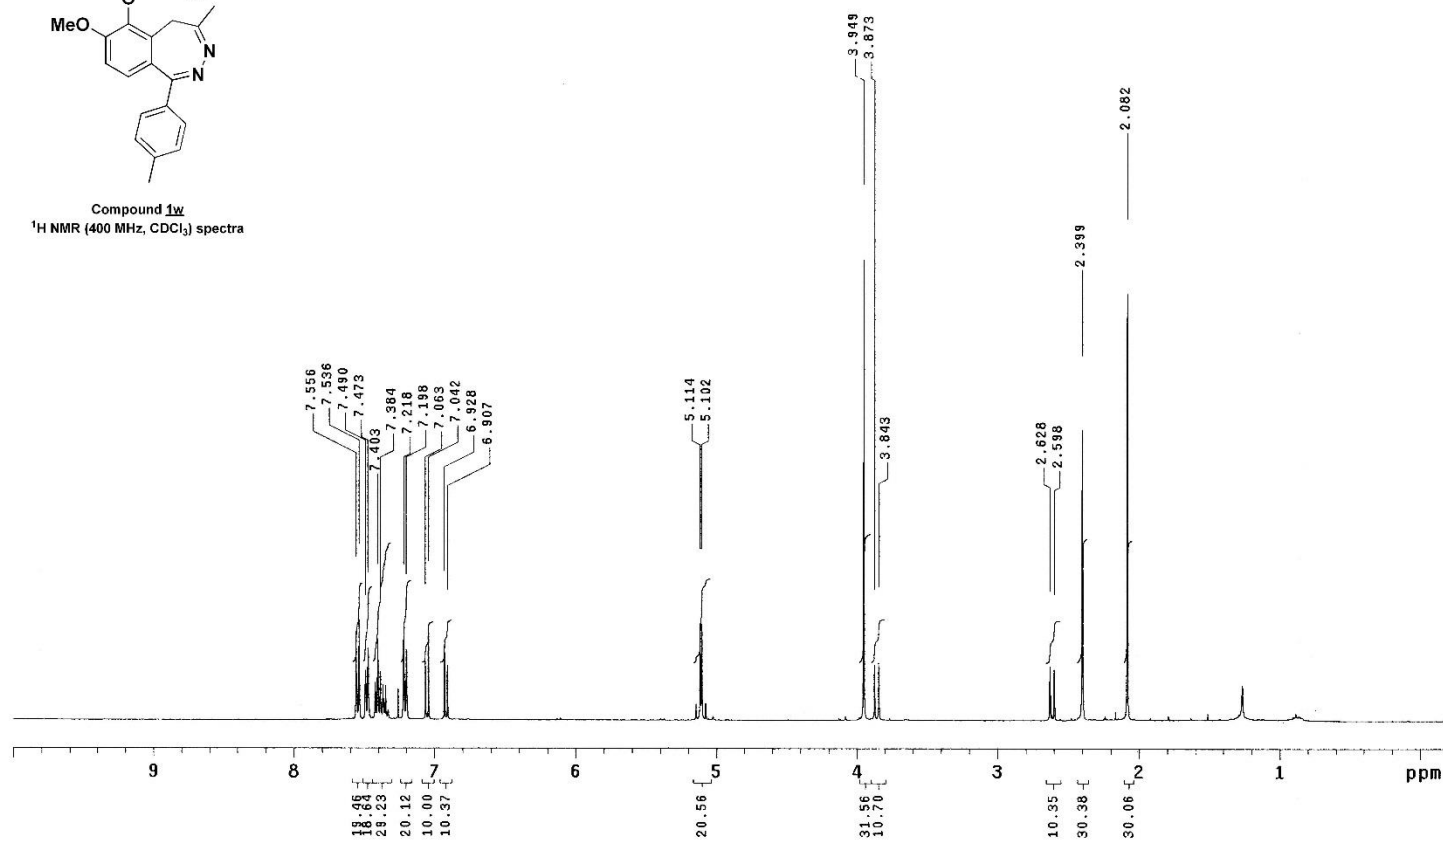

## Compound 1w

YL1040901

Pulse Sequence: s2pul  
UNITYplus-400 "unity400"  
Date: Sep 3 2015  
Solvent: CDCl<sub>3</sub>  
Ambient temperature  
Total 64 repetitions



Compound 1w  
<sup>1</sup>H NMR (400 MHz, CDCl<sub>3</sub>) spectra

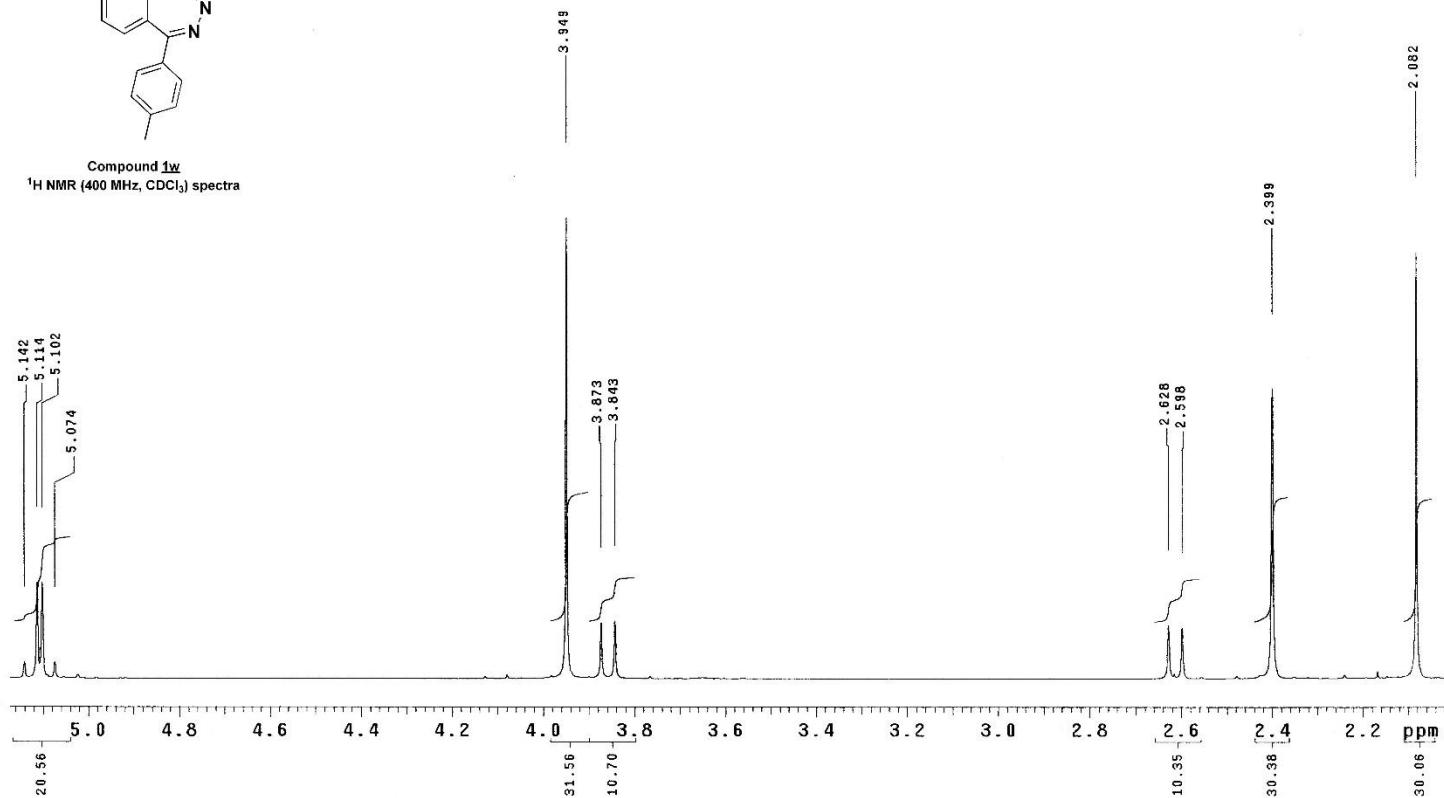

## Compound 1w

YL1040901

Pulse Sequence: s2pul  
UNITYplus-400 "unity400"  
Date: Sep 3 2015  
Solvent: CDCl<sub>3</sub>  
Ambient temperature  
Total 64 repetitions



Compound **1w**  
<sup>1</sup>H NMR (400 MHz, CDCl<sub>3</sub>) spectra

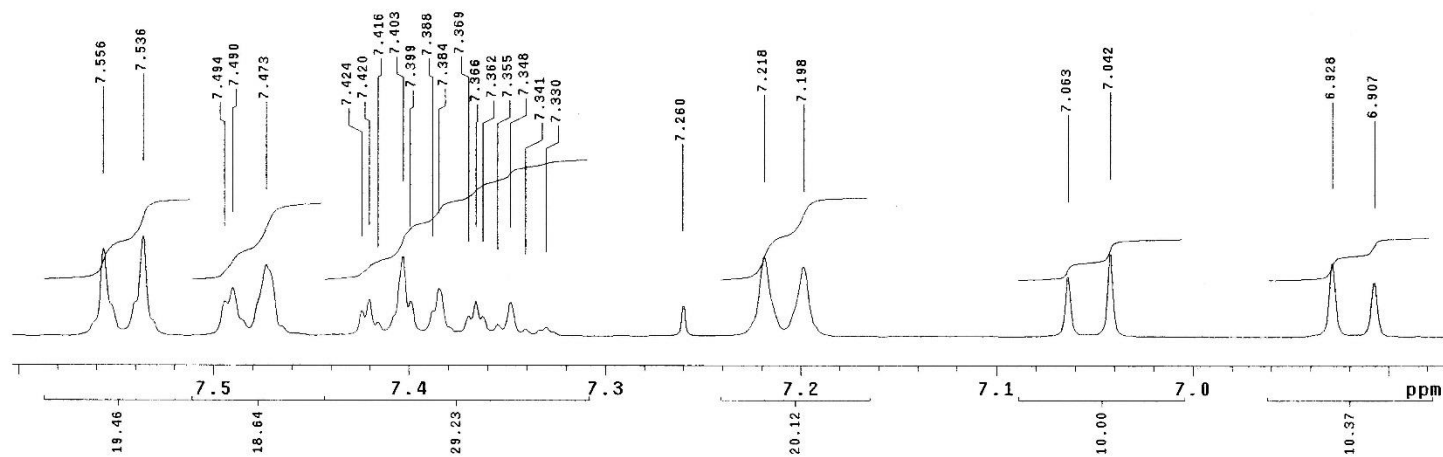

## Compound 1w

YL1040901

Pulse Sequence: s2pu1

UNITYplus-400 "unity400"

Date: Sep 3 2015

Solvent: CDCl<sub>3</sub>

Ambient temperature

Total 1280 repetitions

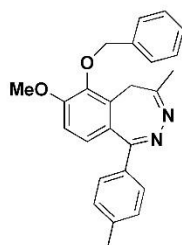

Compound 1w

<sup>13</sup>C NMR (100 MHz, CDCl<sub>3</sub>) spectra

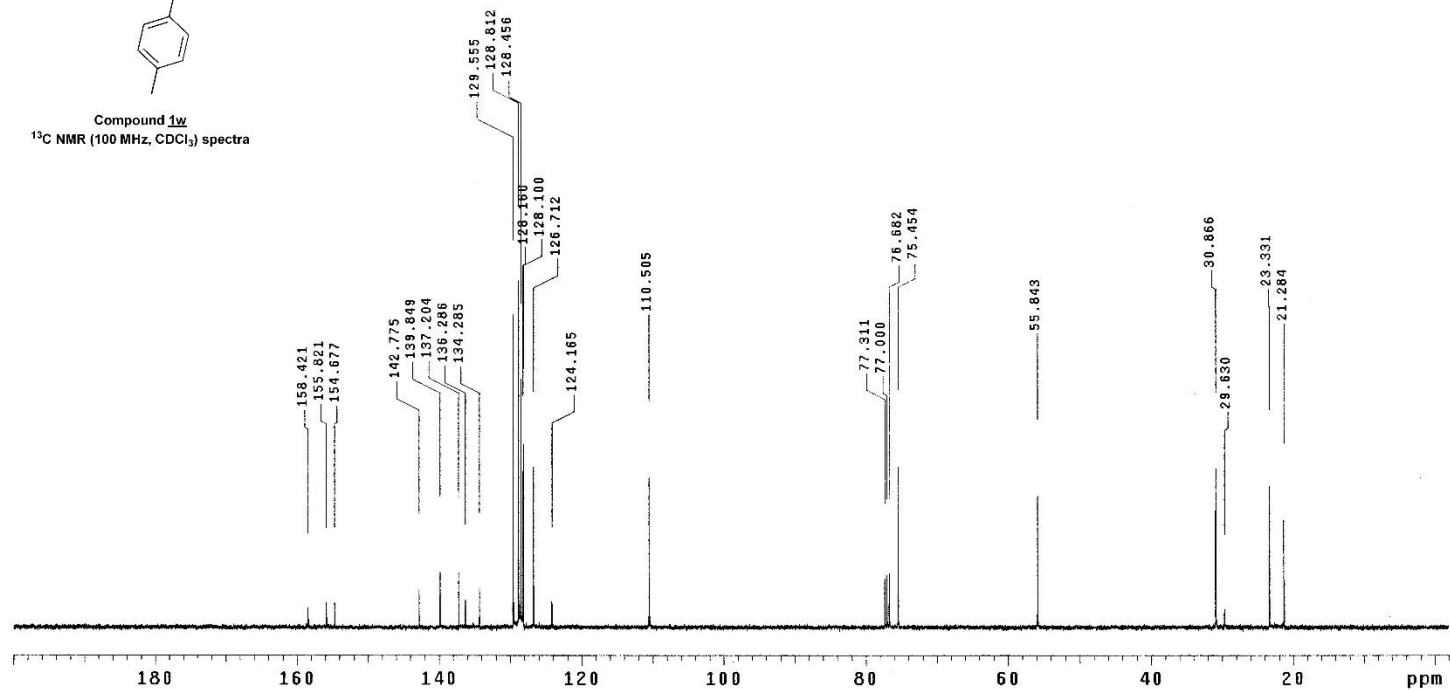

## Compound 1w

YL1040901

Pulse Sequence: s2pu1

UNITYplus-400 "unity400"

Date: Sep 3 2015

Solvent: CDCl<sub>3</sub>

Ambient temperature

Total 1280 repetitions

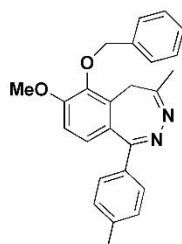

Compound 1w

<sup>13</sup>C NMR (100 MHz, CDCl<sub>3</sub>) spectra

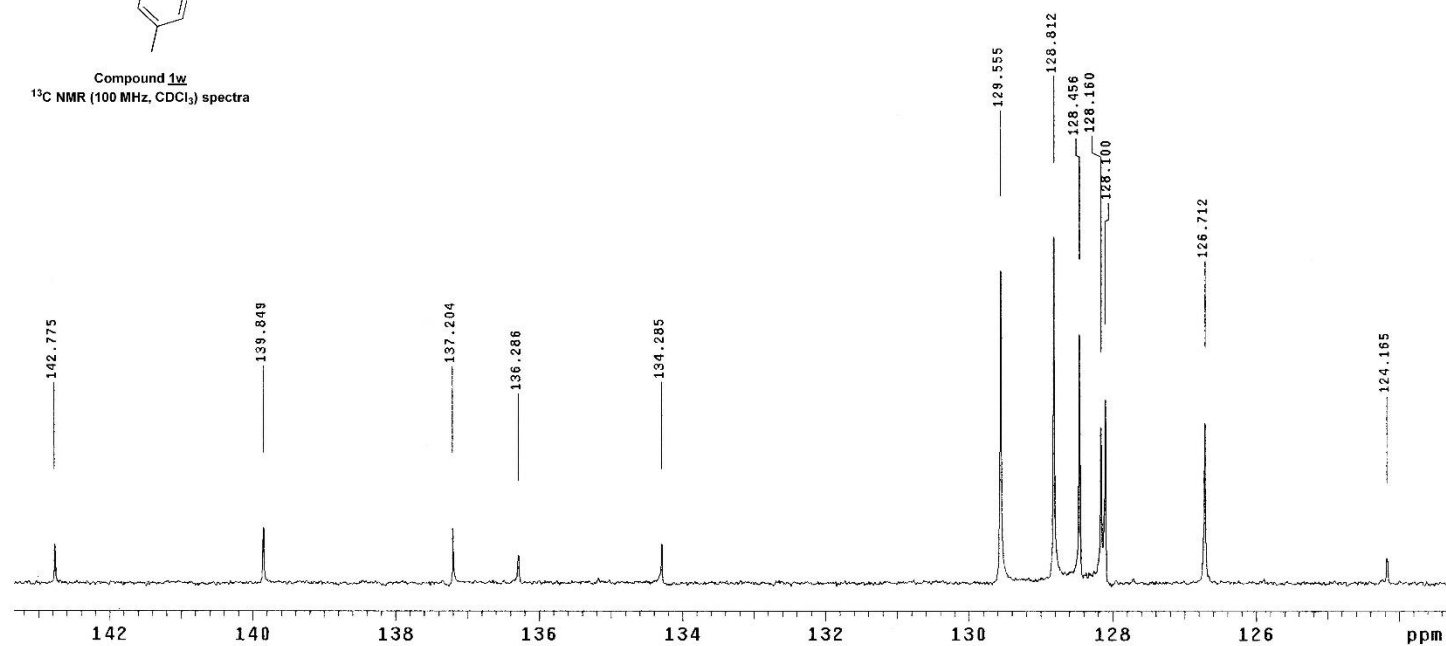



## Compound 1x

YL1040909

Pulse Sequence: s2pu1  
UNITYplus-400 "unity400"  
Date: Sep 11 2015  
Solvent: CDCl<sub>3</sub>  
Ambient temperature  
Total 64 repetitions

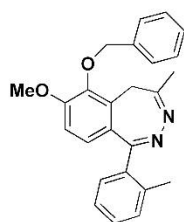

Compound 1x  
<sup>1</sup>H NMR (400 MHz, CDCl<sub>3</sub>) spectra

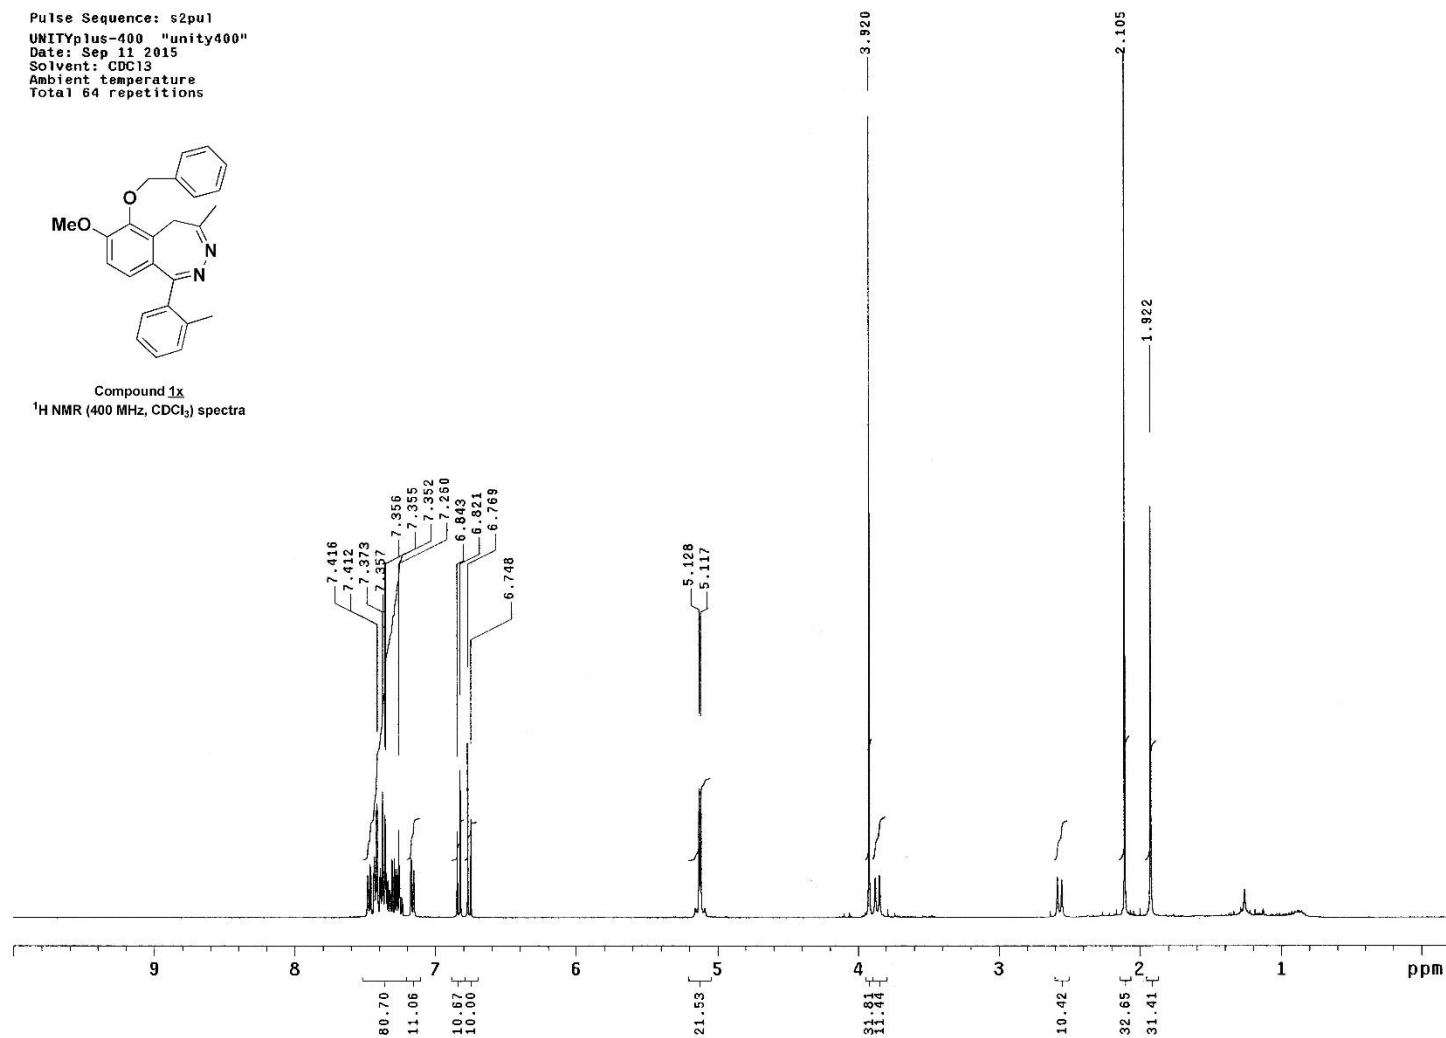

## Compound 1x

YL1040909

Pulse Sequence: s2pu1  
UNITYplus-400 "unity400"  
Date: Sep 11 2015  
Solvent: CDCl<sub>3</sub>  
Ambient temperature  
Total 64 repetitions

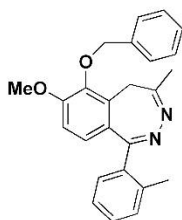

Compound 1x  
<sup>1</sup>H NMR (400 MHz, CDCl<sub>3</sub>) spectra

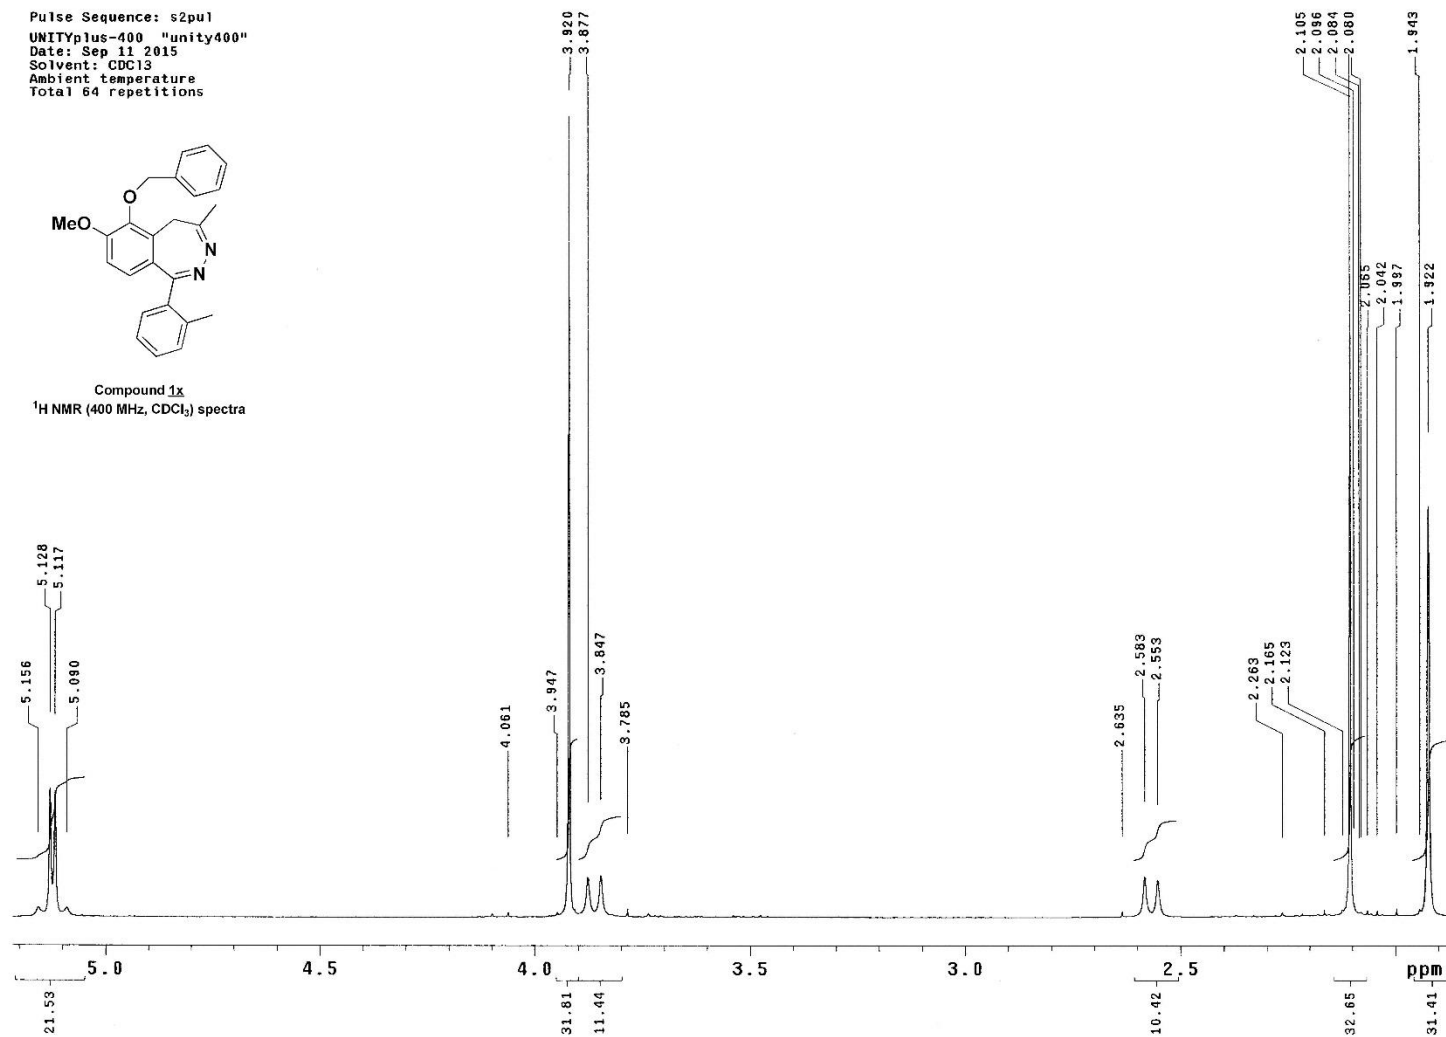

## Compound 1x

YL1040909

Pulse Sequence: s2pu1  
UNITYplus-400 "unity400"  
Date: Sep 11 2015  
Solvent: CDCl<sub>3</sub>  
Ambient temperature  
Total 64 repetitions

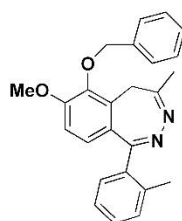

Compound 1x  
<sup>1</sup>H NMR (400 MHz, CDCl<sub>3</sub>) spectra

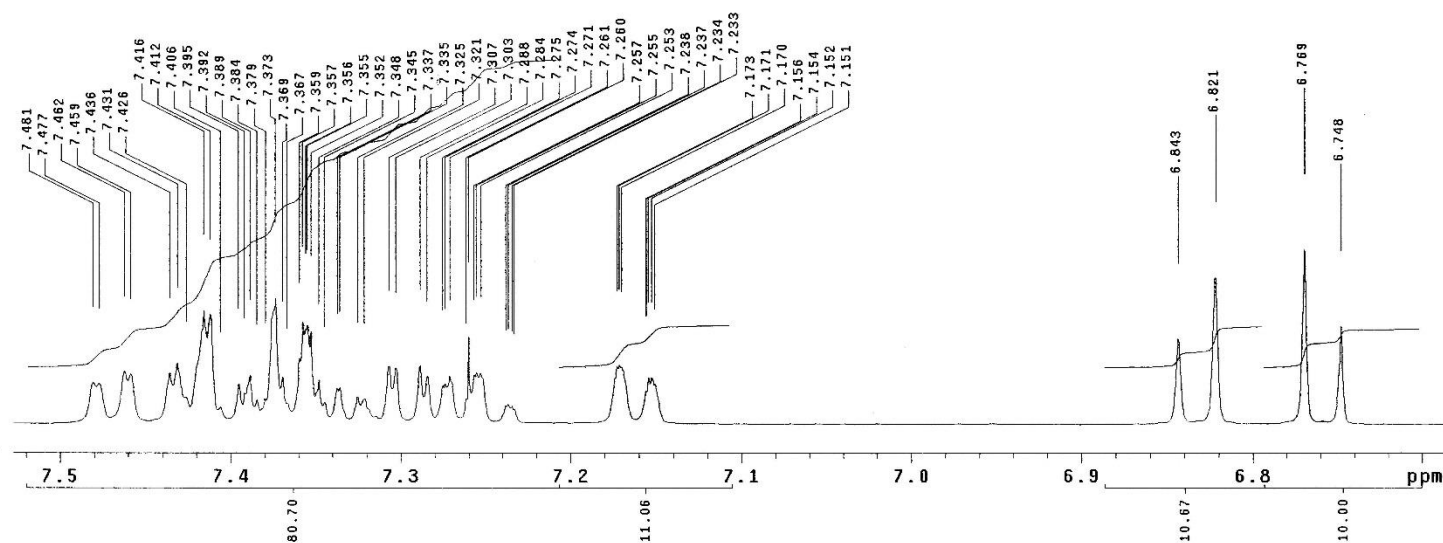

## Compound 1x

YL1040909  
Pulse Sequence: s2pu1  
UNITYplus-400 "unity400"  
Date: Sep 11 2015  
Solvent: CDCl<sub>3</sub>  
Ambient temperature  
Total 1312 repetitions

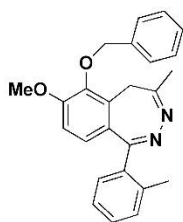

Compound 1x  
<sup>13</sup>C NMR (100 MHz, CDCl<sub>3</sub>) spectra

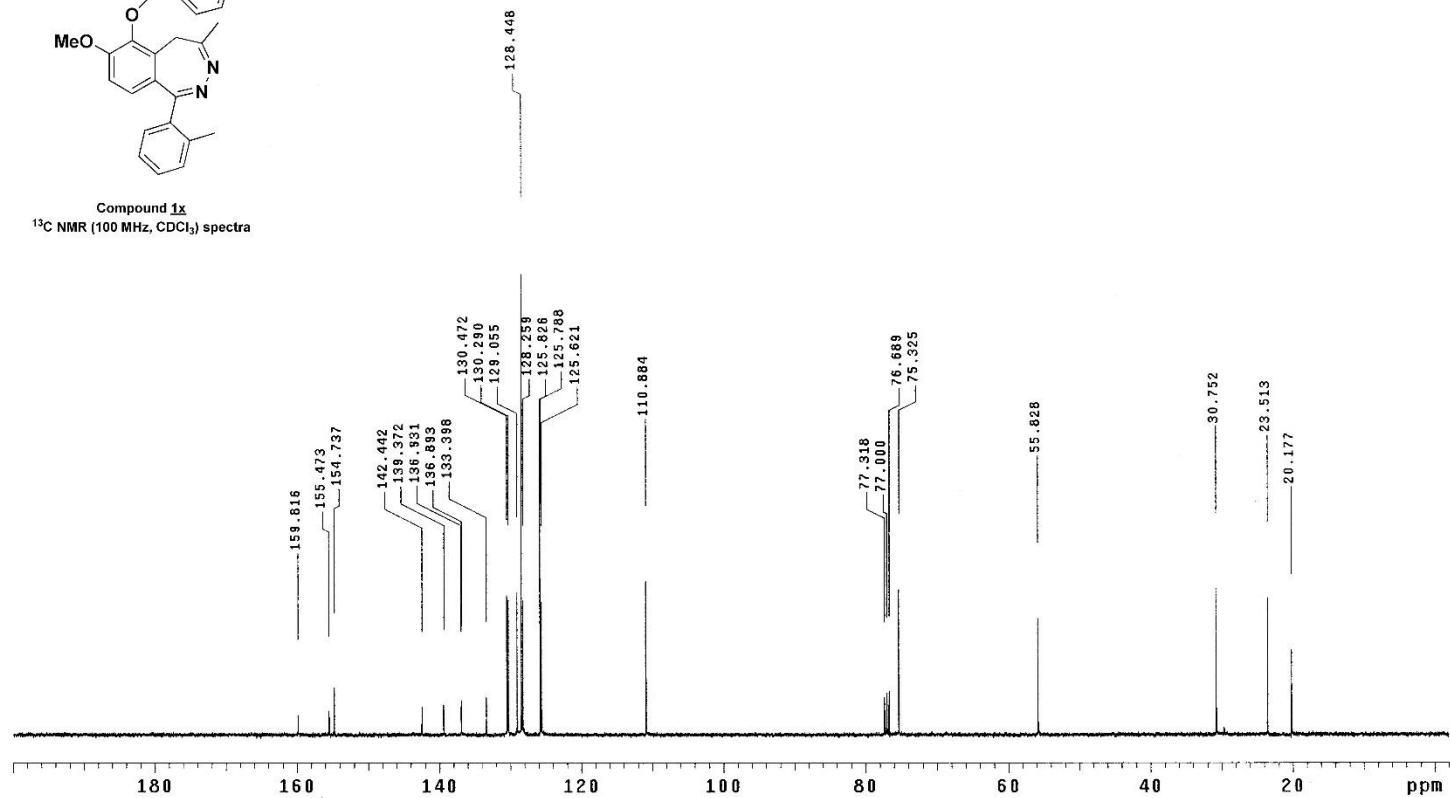

## Compound 1x

YL1040909  
Pulse Sequence: s2pu1  
UNITYplus-400 "unity400"  
Date: Sep 11 2015  
Solvent: CDCl<sub>3</sub>  
Ambient temperature  
Total 1312 repetitions



Compound 1x  
<sup>13</sup>C NMR (100 MHz, CDCl<sub>3</sub>) spectra

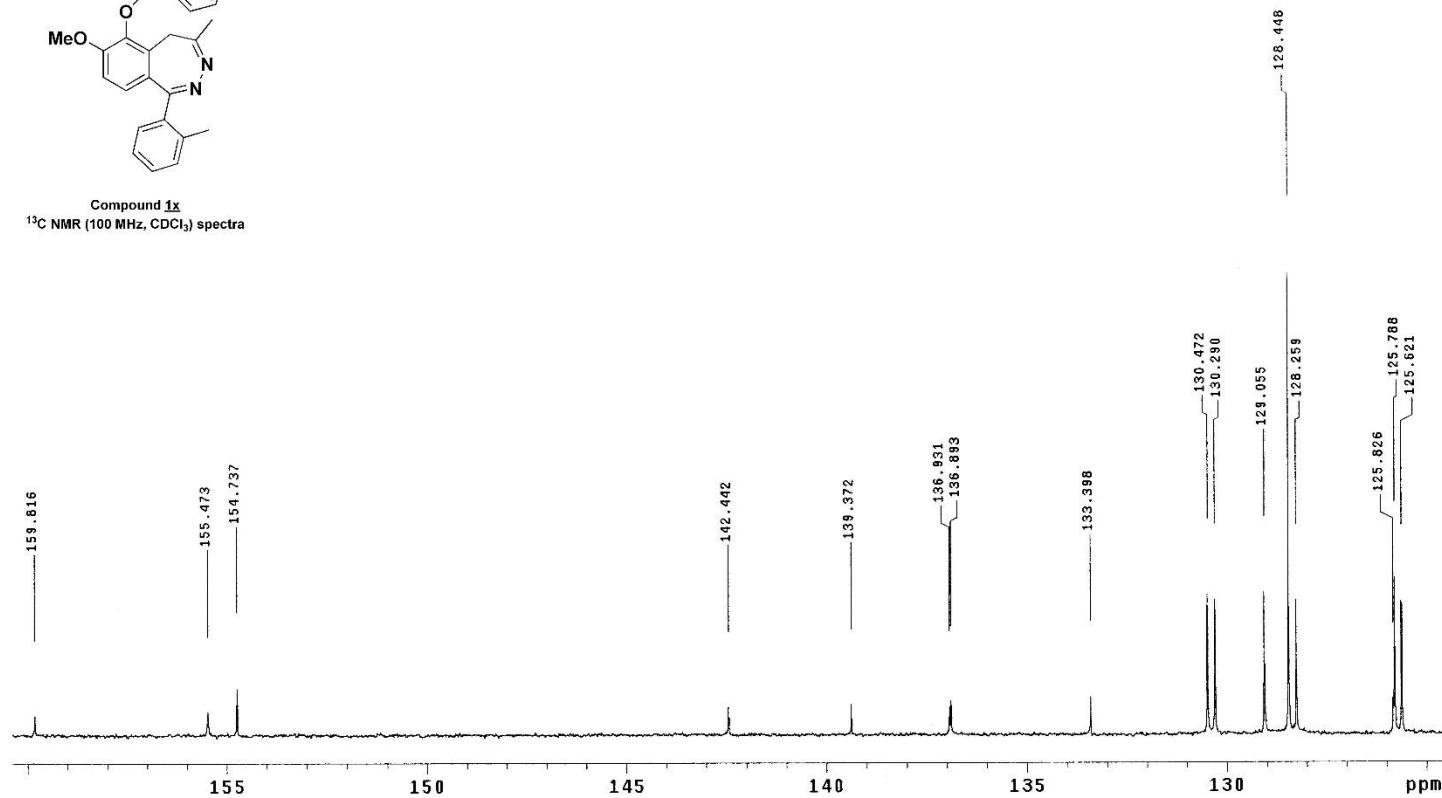

## Compound 1y

YL1040830

Pulse Sequence: s2pul  
UNITYplus-400 "unity400"  
Date: Sep 1 2015  
Solvent: CDCl<sub>3</sub>  
Ambient temperature  
Total 64 repetitions

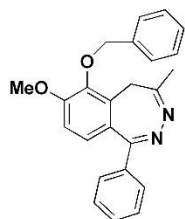

Compound **1y**  
<sup>1</sup>H NMR (400 MHz, CDCl<sub>3</sub>) spectra

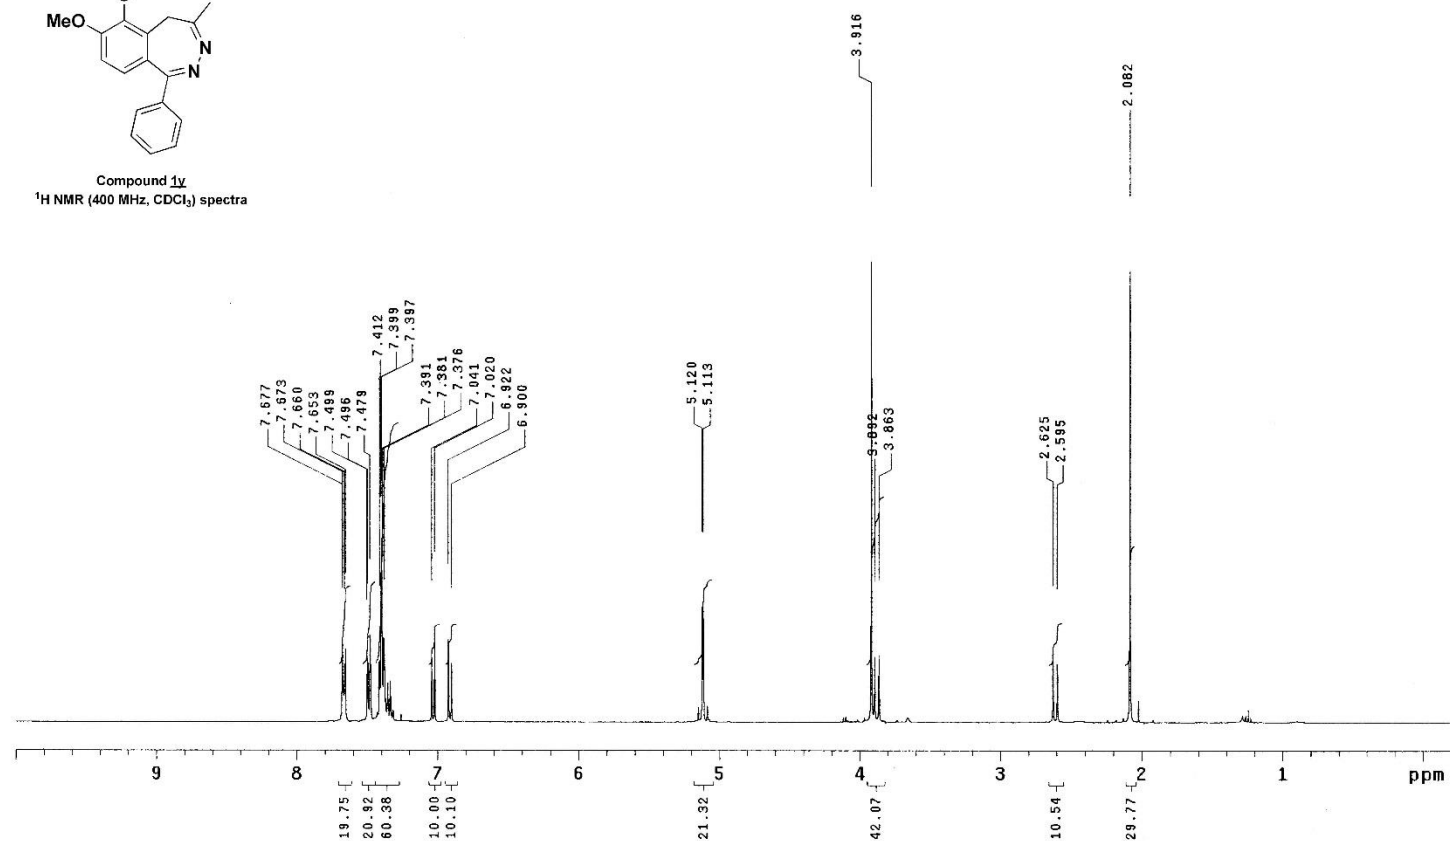

## Compound 1y

YL1040830

Pulse Sequence: s2pul

UNITYplus-400 "unity400"

Date: Sep 1 2015

Solvent: CDCl<sub>3</sub>

Ambient temperature

Total 64 repetitions

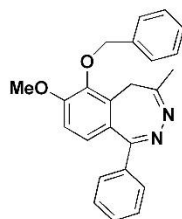

Compound 1y

<sup>1</sup>H NMR (400 MHz, CDCl<sub>3</sub>) spectra

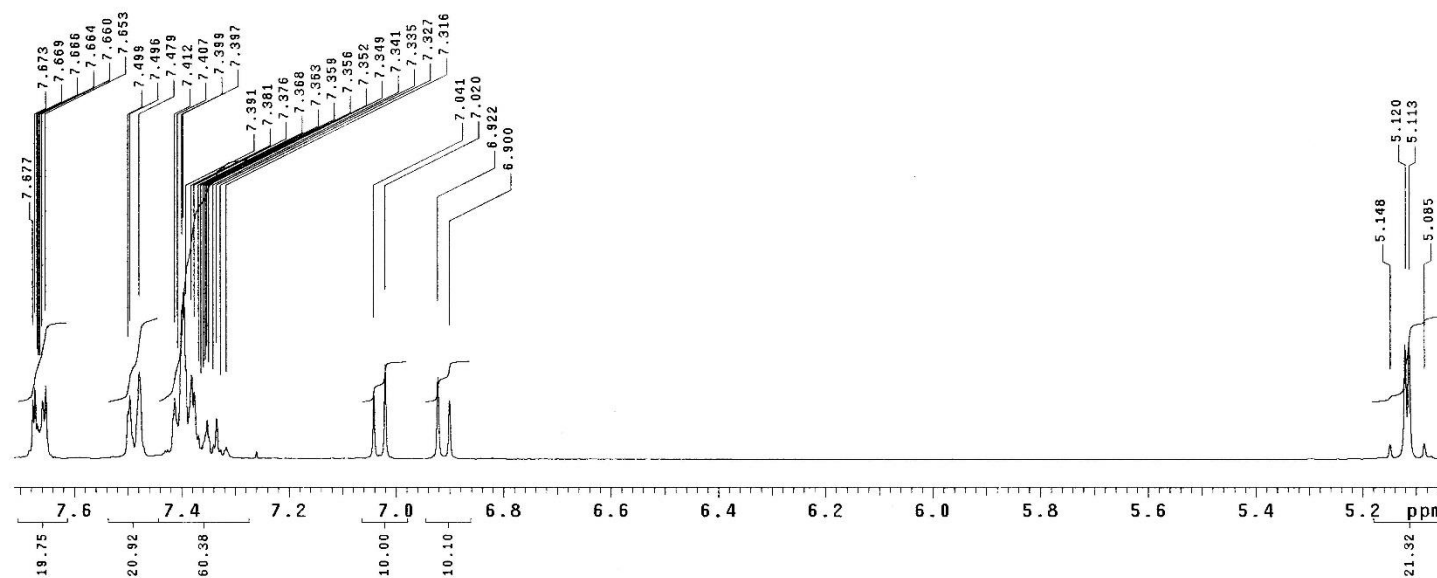

## Compound 1y

YL1040830

Pulse Sequence: s2pu1

UNITYplus-400 "unity400"

Date: Sep 1 2015

Solvent: CDCl<sub>3</sub>

Ambient temperature

Total 704 repetitions

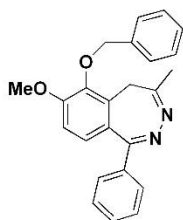

Compound 1y

<sup>13</sup>C NMR (100 MHz, CDCl<sub>3</sub>) spectra

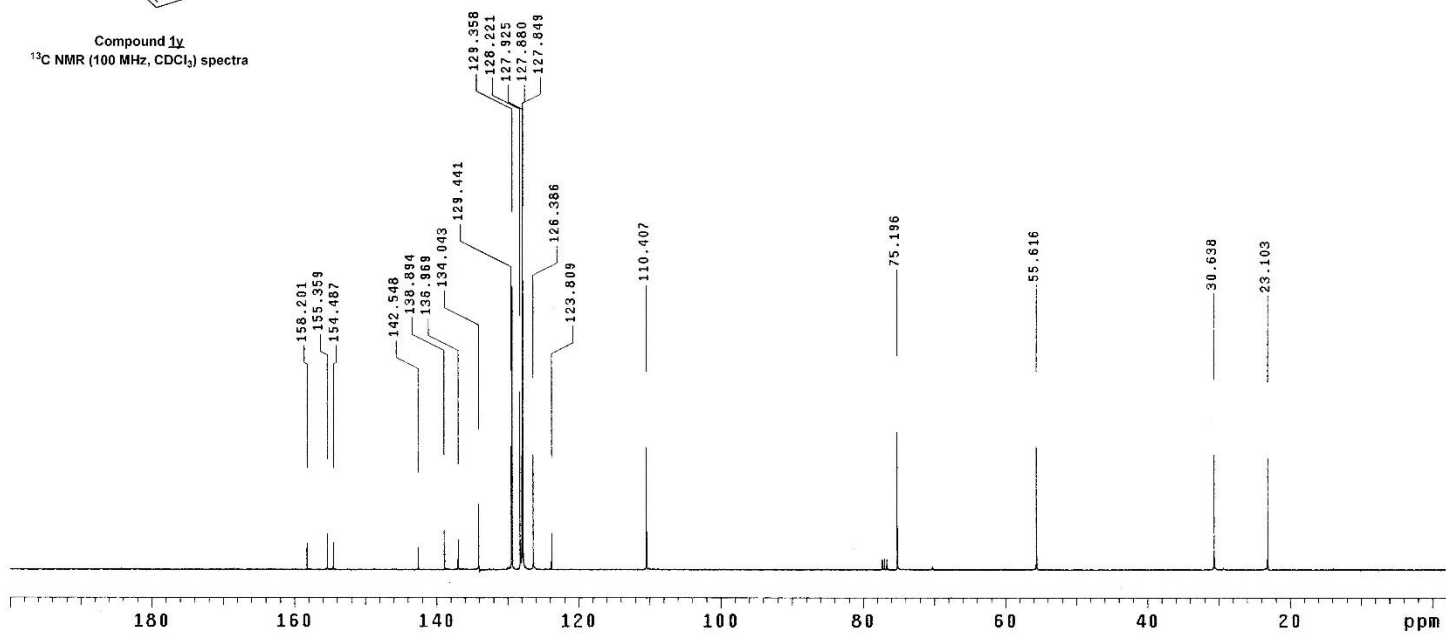



## Compound 1y

YL1040830

Pulse Sequence: s2pu1

UNITYplus-400 "unity400"

Date: Sep 1 2015

Solvent: CDCl<sub>3</sub>

Ambient temperature

Total 704 repetitions

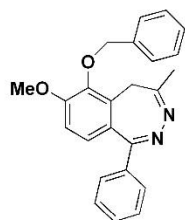

Compound 1y

<sup>13</sup>C NMR (100 MHz, CDCl<sub>3</sub>) spectra

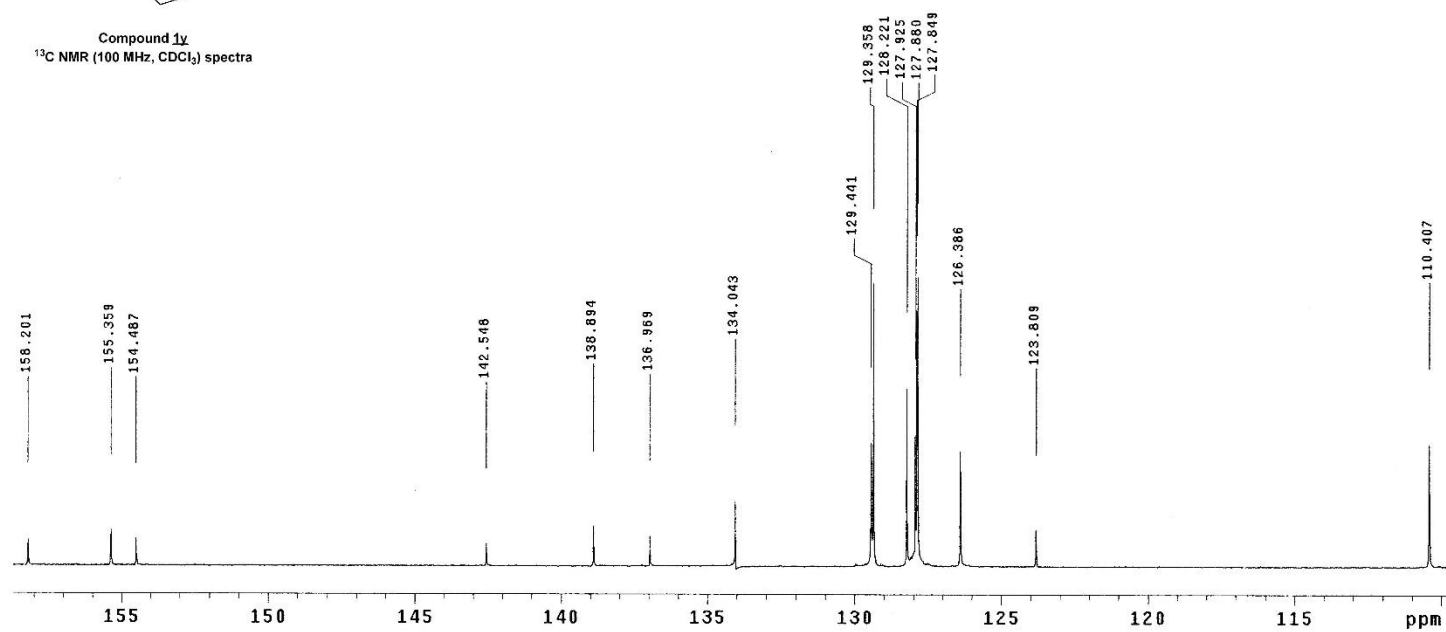

## Compound 1z

YL1040916

Pulse Sequence: s2pul  
UNITYplus-400 "unity400"  
Date: Sep 17 2015  
Solvent: CDCl<sub>3</sub>  
Ambient temperature  
Total 64 repetitions

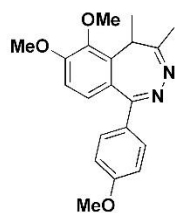

Compound 1z  
<sup>1</sup>H NMR (400 MHz, CDCl<sub>3</sub>) spectra

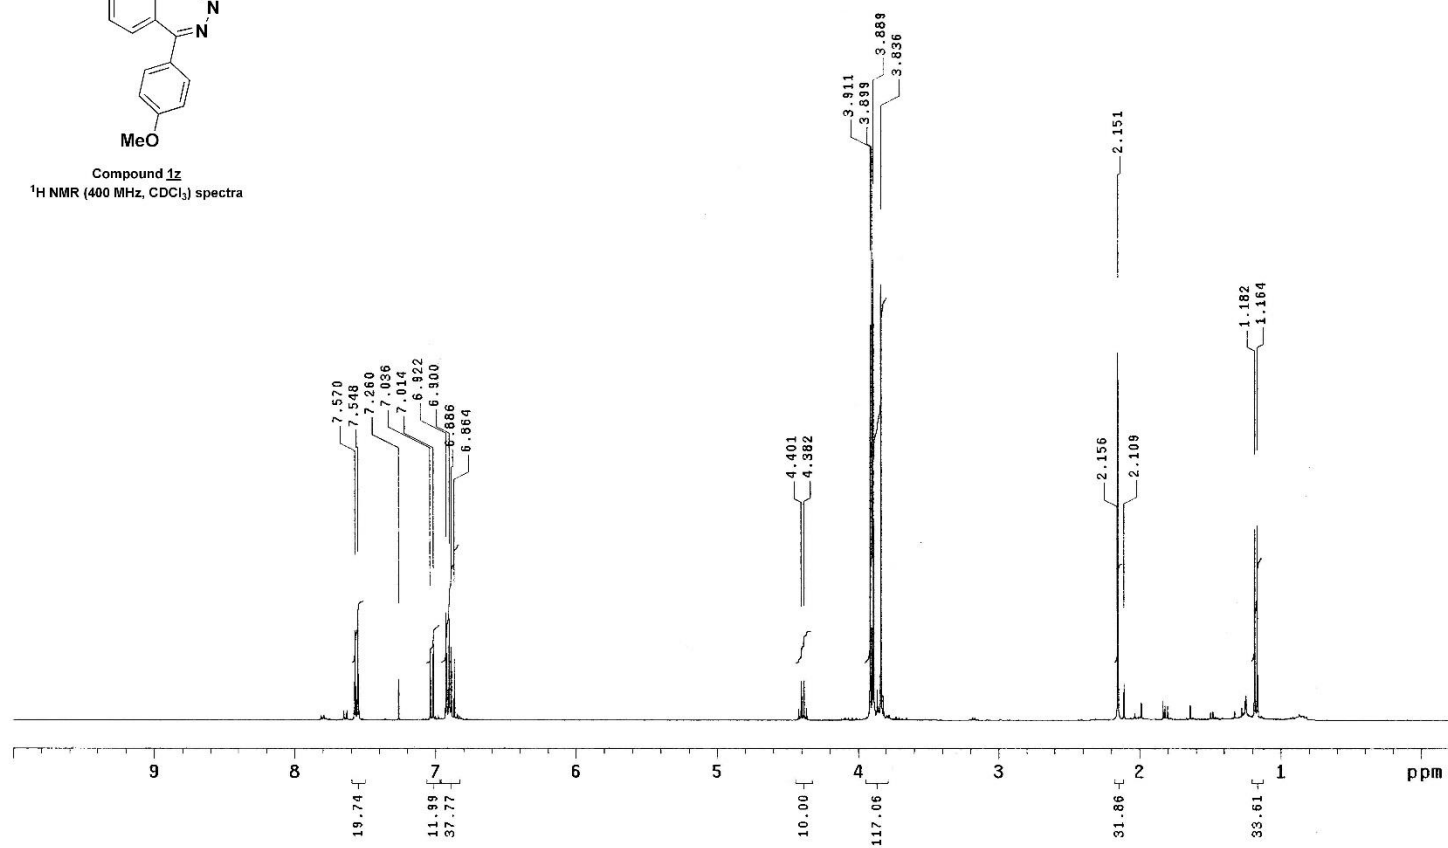

## Compound 1z

YL1040916

Pulse Sequence: s2pul

UNITYplus-400 "unity400"

Date: Sep 17 2015

Solvent: CDCl<sub>3</sub>

Ambient temperature

Total 64 repetitions

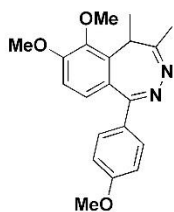

Compound 1z

<sup>1</sup>H NMR (400 MHz, CDCl<sub>3</sub>) spectra

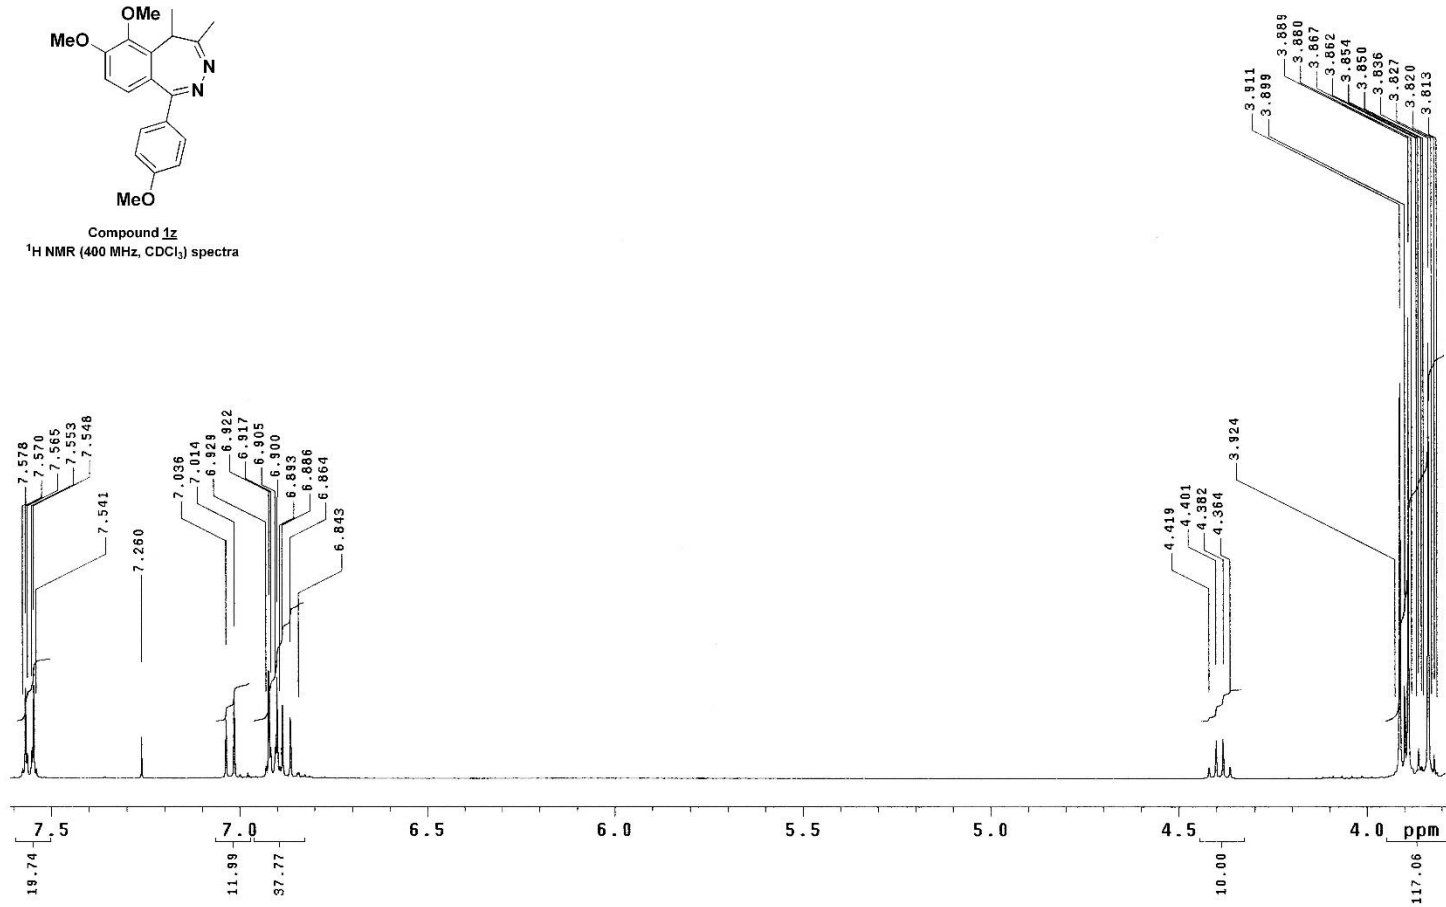

## Compound 1z

YL1040916

Pulse Sequence: s2pu1  
UNITYplus-400 "unity400"  
Date: Sep 17 2015  
Solvent: CDCl<sub>3</sub>  
Ambient temperature  
Total 1680 repetitions

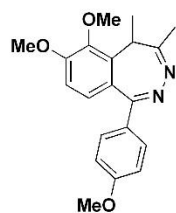

Compound 1z

<sup>13</sup>C NMR (100 MHz, CDCl<sub>3</sub>) spectra

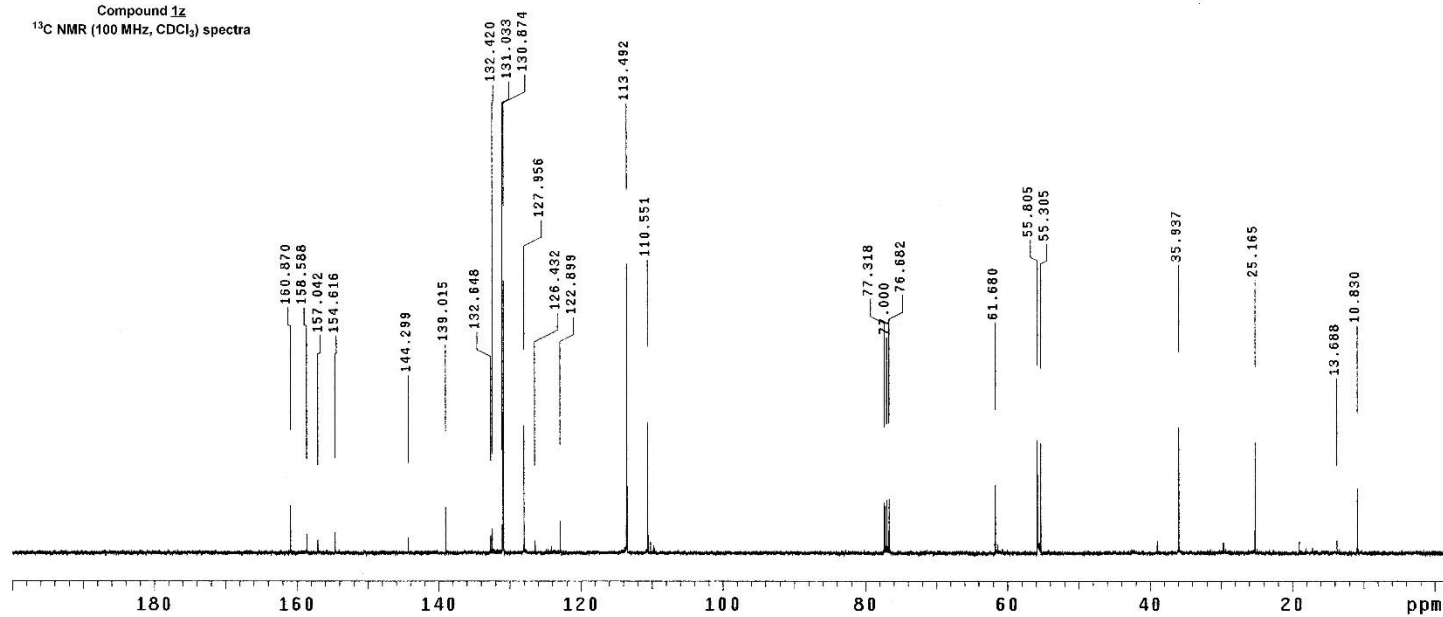

## Compound 1z

YL1040916

Pulse Sequence: s2pu1

UNITYplus-400 "unity400"

Date: Sep 17 2015

Solvent: CDCl<sub>3</sub>

Ambient temperature

Total 1680 repetitions



Compound 1z

<sup>13</sup>C NMR (100 MHz, CDCl<sub>3</sub>) spectra

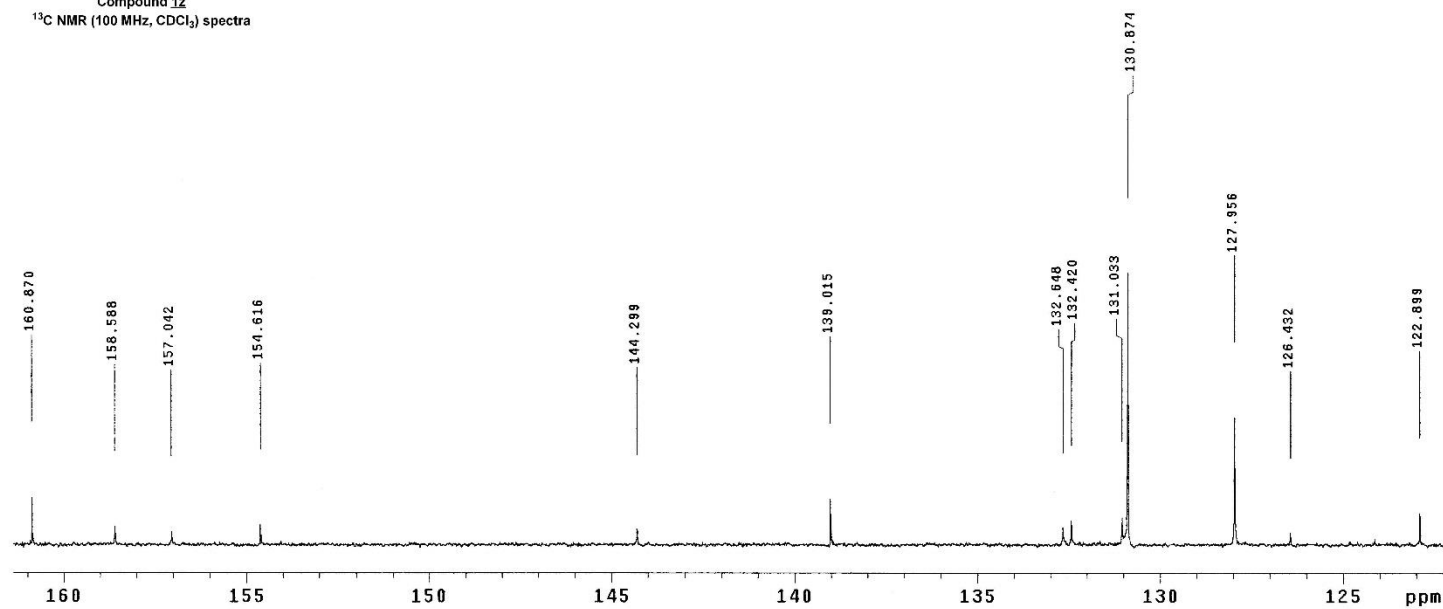

## Compound 1aa

YL1040915

Pulse Sequence: s2pu1

UNITYplus-400 "unity400"

Date: Sep 16 2015

Solvent: CDCl<sub>3</sub>

Ambient temperature

Total 64 repetitions

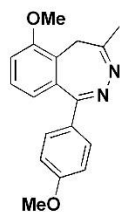

Compound 1aa

<sup>1</sup>H NMR (400 MHz, CDCl<sub>3</sub>) spectra

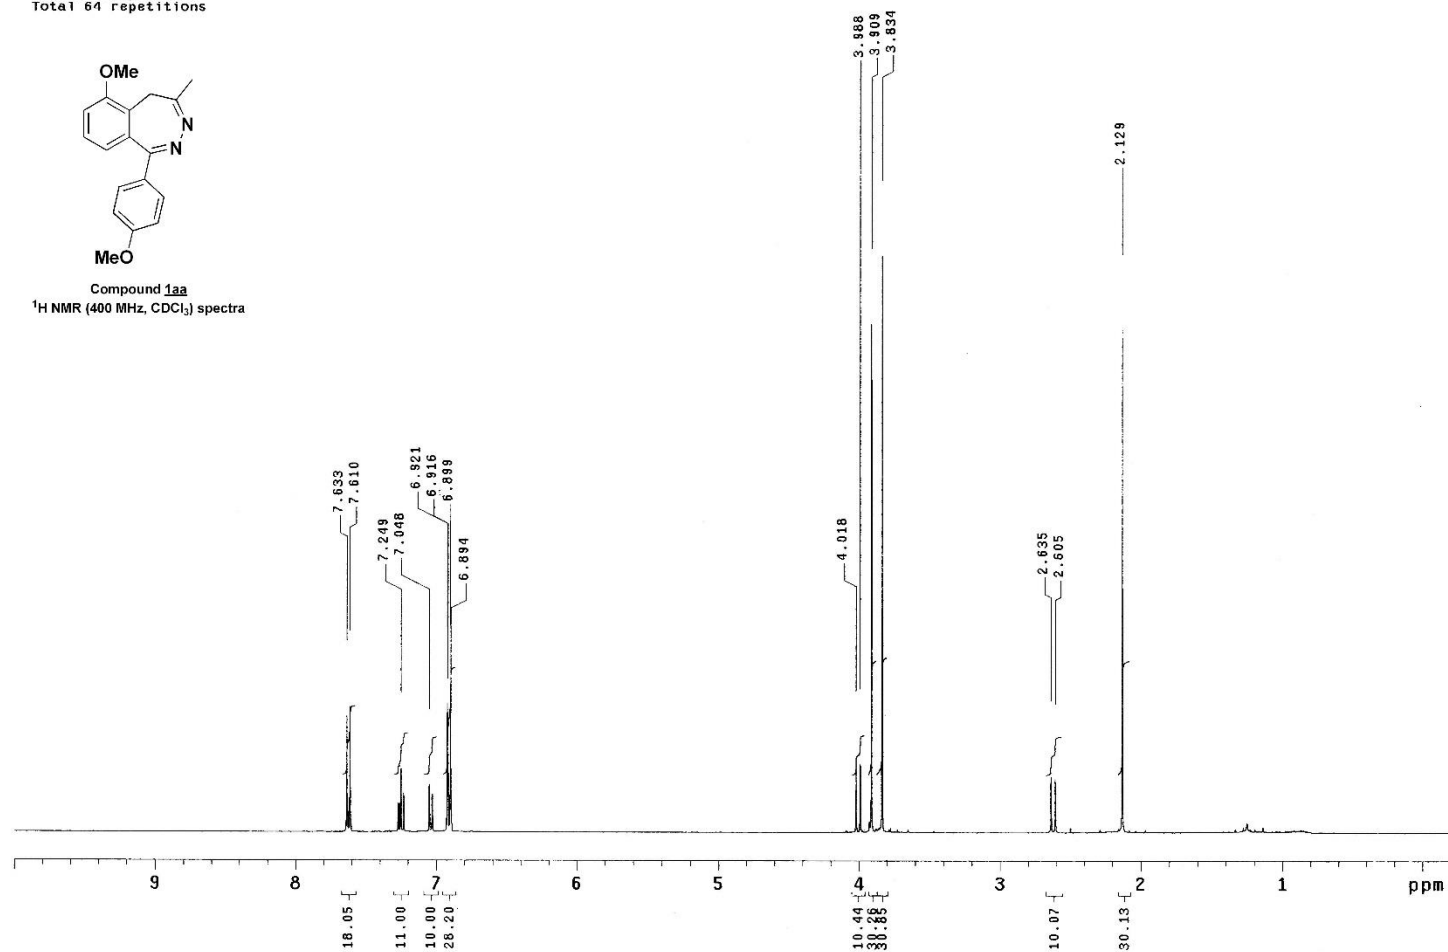

## Compound 1aa

YL1040915

Pulse Sequence: s2pu1  
UNITYplus-400 "unity400"  
Date: Sep 16 2015  
Solvent: CDCl<sub>3</sub>  
Ambient temperature  
Total 64 repetitions

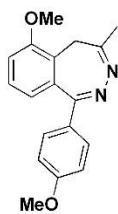

Compound **1aa**  
<sup>1</sup>H NMR (400 MHz, CDCl<sub>3</sub>) spectra

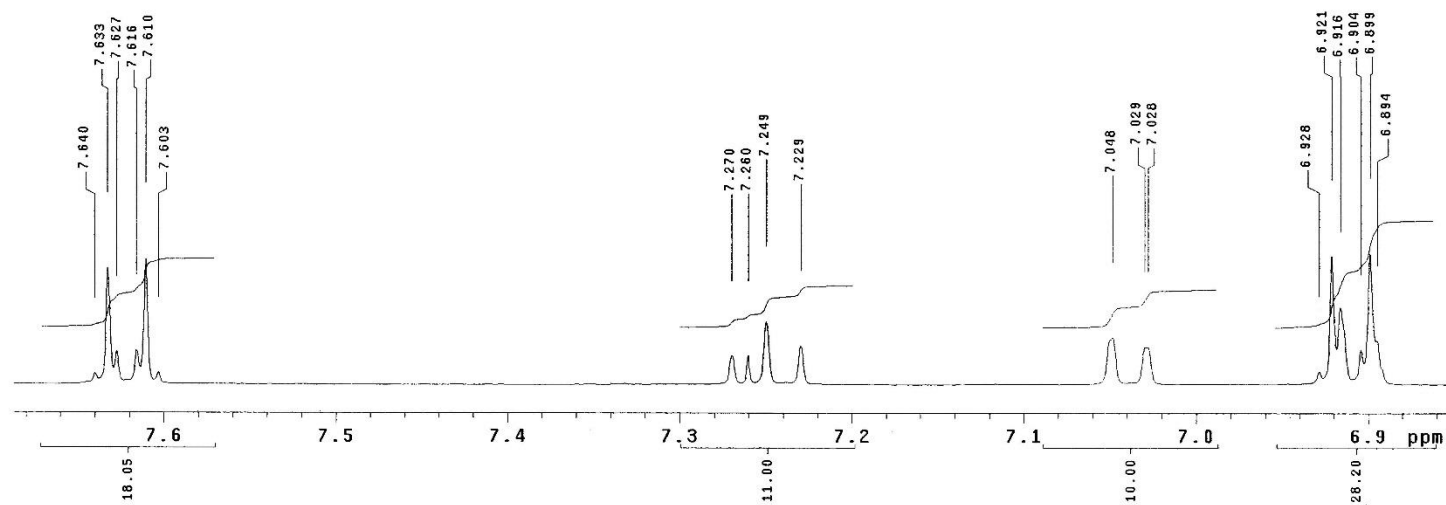

## Compound 1aa

YL1040915

Pulse Sequence: s2pu1

UNITYplus-400 "unity400"

Date: Sep 16 2015

Solvent: CDCl<sub>3</sub>

Ambient temperature

Total 736 repetitions

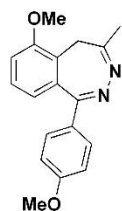

Compound 1aa

<sup>13</sup>C NMR (100 MHz, CDCl<sub>3</sub>) spectra

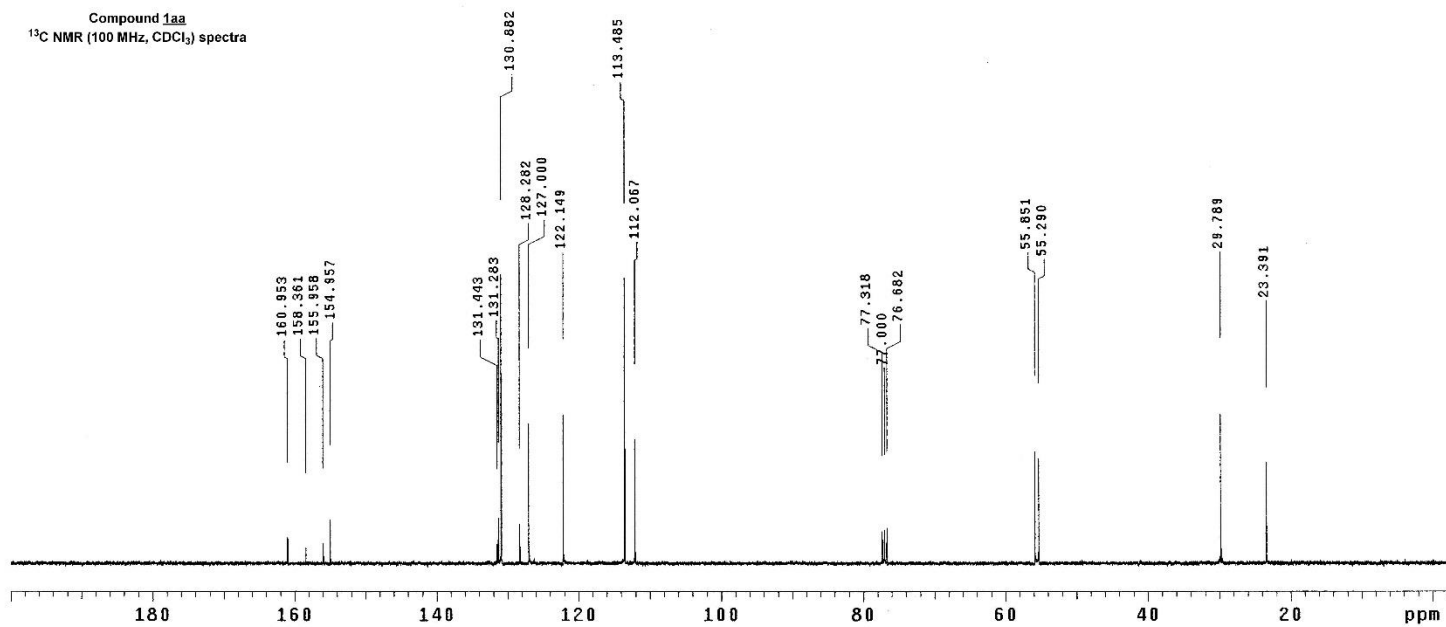



## Compound 1aa

YL1040915

Pulse Sequence: s2pu1

UNITYplus-400 "unity400"

Date: Sep 16 2015

Solvent: CDCl<sub>3</sub>

Ambient temperature

Total 736 repetitions

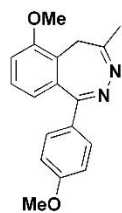

Compound 1aa

<sup>13</sup>C NMR (100 MHz, CDCl<sub>3</sub>) spectra

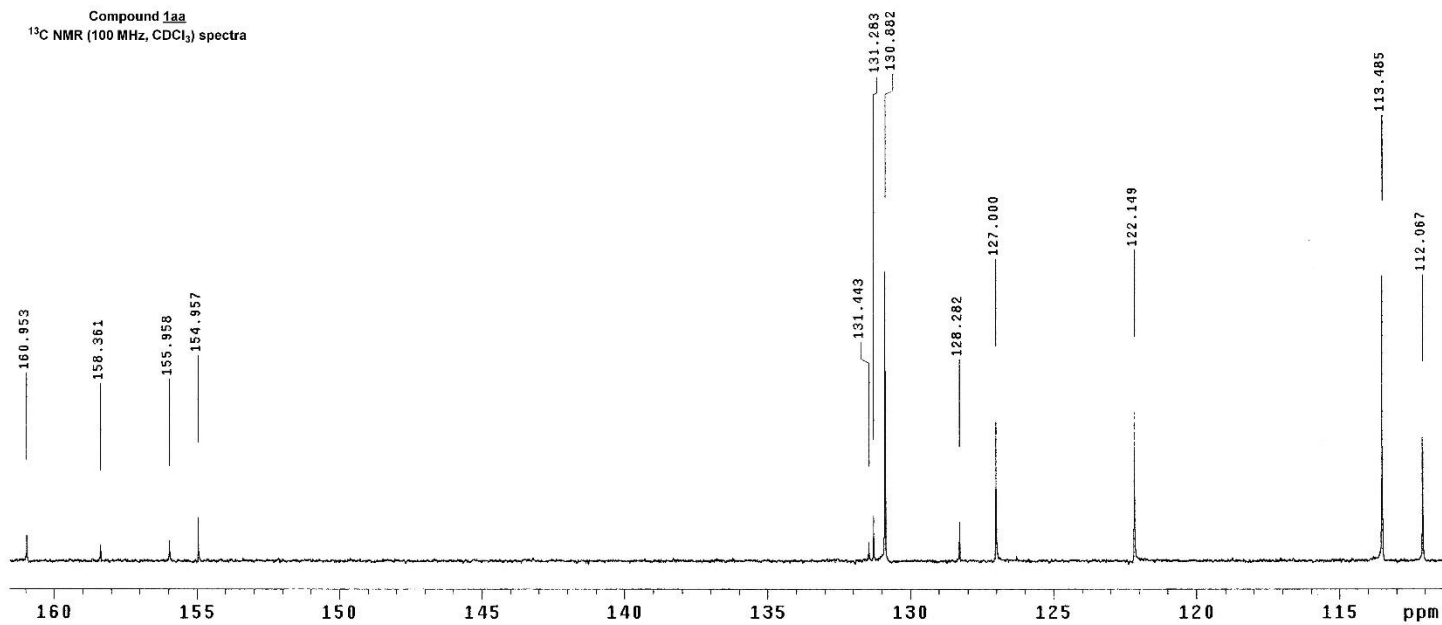

## Compound 6a

YLenon2a

Pulse Sequence: s2pu1

UNITYplus-400 "unity400"

Date: Nov 2 2015

Solvent: CDCl<sub>3</sub>

Ambient temperature

Total 32 repetitions

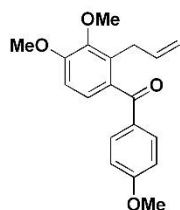

Compound 6a  
<sup>1</sup>H NMR (400 MHz, CDCl<sub>3</sub>) spectra

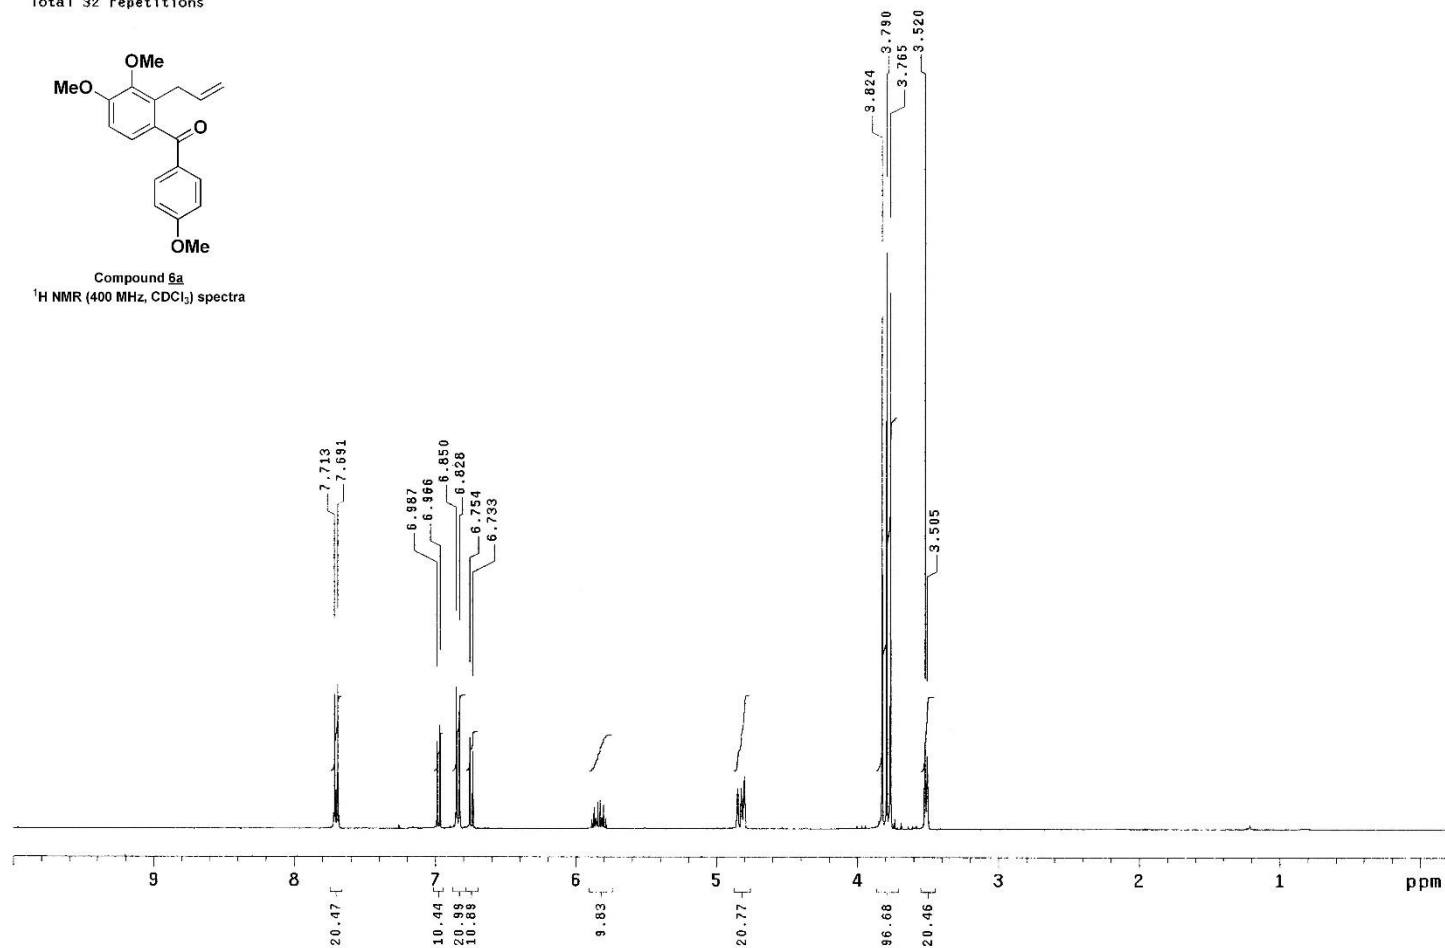

## Compound 6a

YLenon2a

Pulse Sequence: s2pu1  
UNITYplus-400 "unity400"  
Date: Nov 2 2015  
Solvent: CDCl<sub>3</sub>  
Ambient temperature  
Total 32 repetitions



Compound 6a  
<sup>1</sup>H NMR (400 MHz, CDCl<sub>3</sub>) spectra

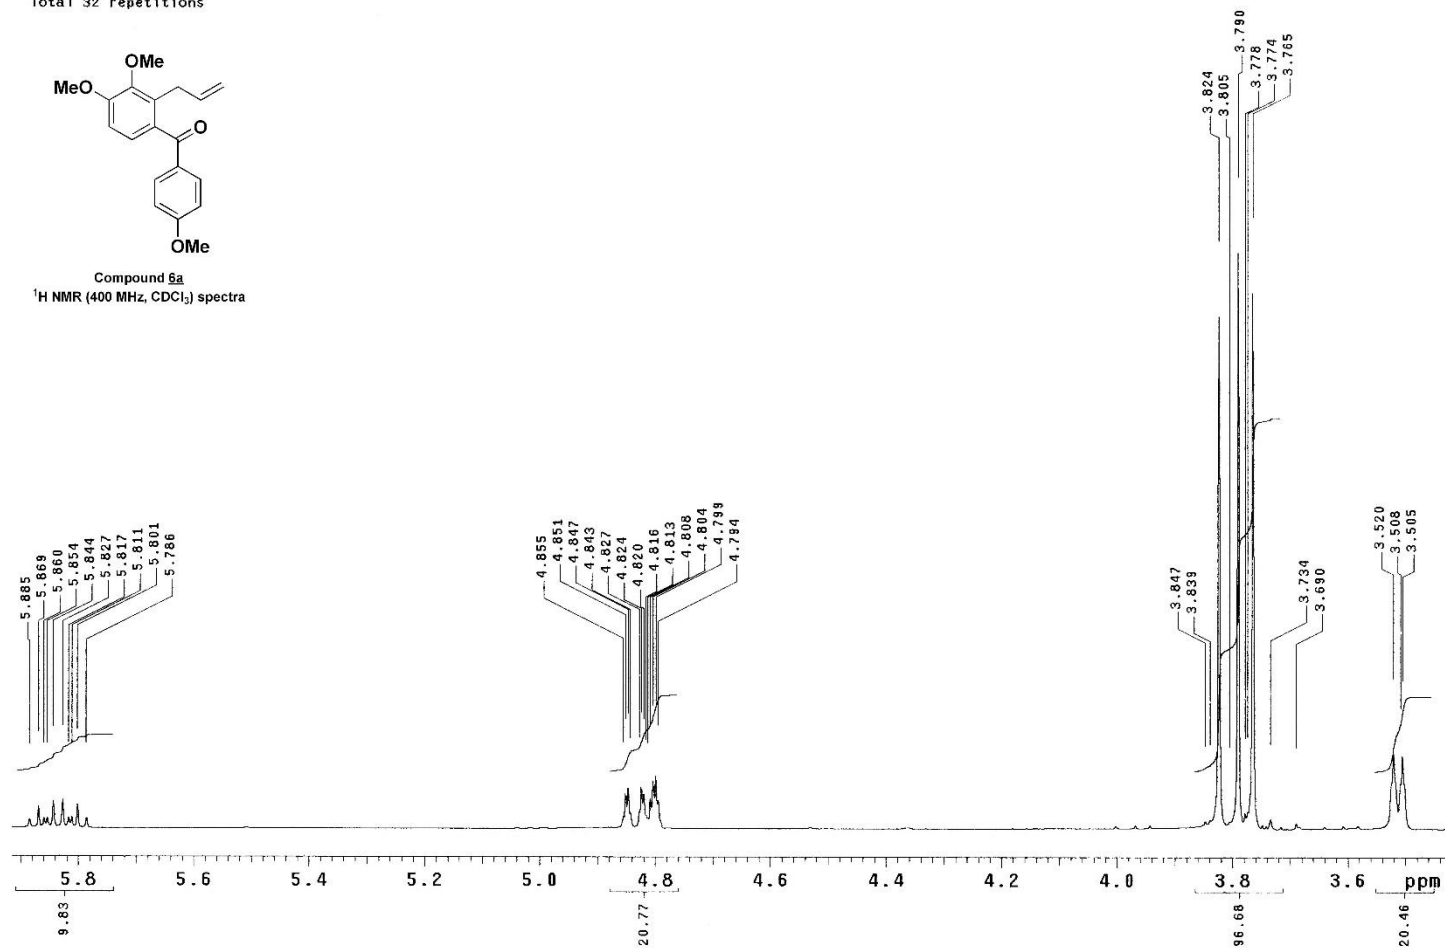

## Compound 6a

YLenon2a

Pulse Sequence: s2pu1  
UNITYplus-400 "unity400"  
Date: Nov 2 2015  
Solvent: CDCl<sub>3</sub>  
Ambient temperature  
Total 32 repetitions



Compound 6a  
<sup>1</sup>H NMR (400 MHz, CDCl<sub>3</sub>) spectra

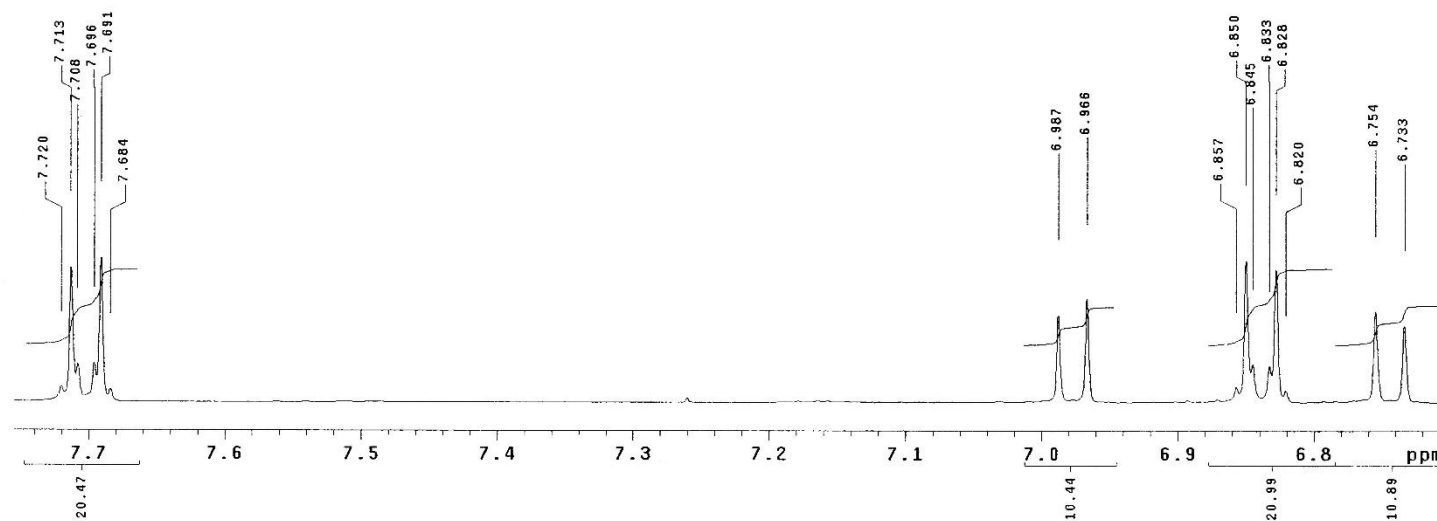

## Compound 6a

YLenon2a

Pulse Sequence: s2pul  
UNITYplus-400 "unity400"  
Date: Nov 2 2015  
Solvent: CDCl<sub>3</sub>  
Ambient temperature  
Total 704 repetitions

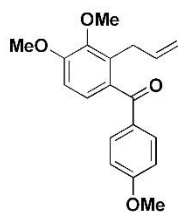

Compound 6a

<sup>13</sup>C NMR (100 MHz, CDCl<sub>3</sub>) spectra

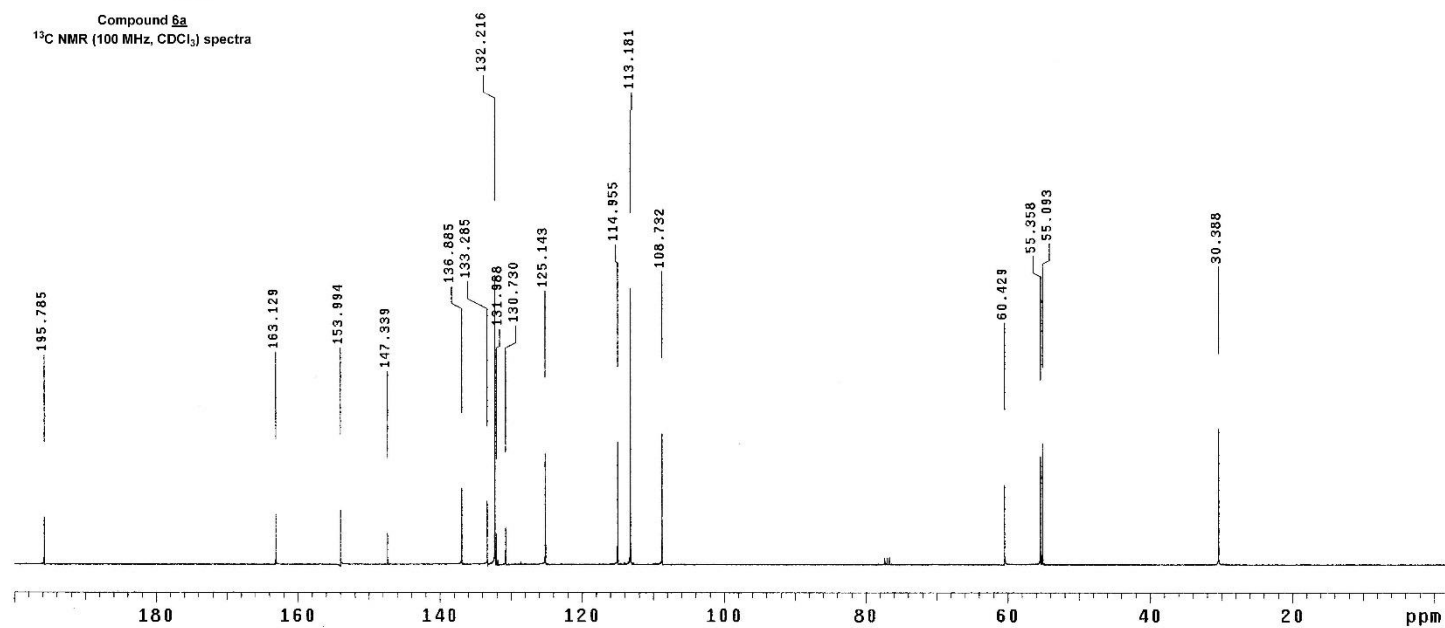

## Compound 6b

YLenon2b

Pulse Sequence: s2pu1

UNITYplus-400 "unity400"

Date: Nov 20 2015

Solvent: CDCl<sub>3</sub>

Ambient temperature

Total 64 repetitions

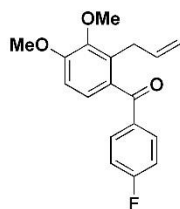

Compound 6b

<sup>1</sup>H NMR (400 MHz, CDCl<sub>3</sub>) spectra

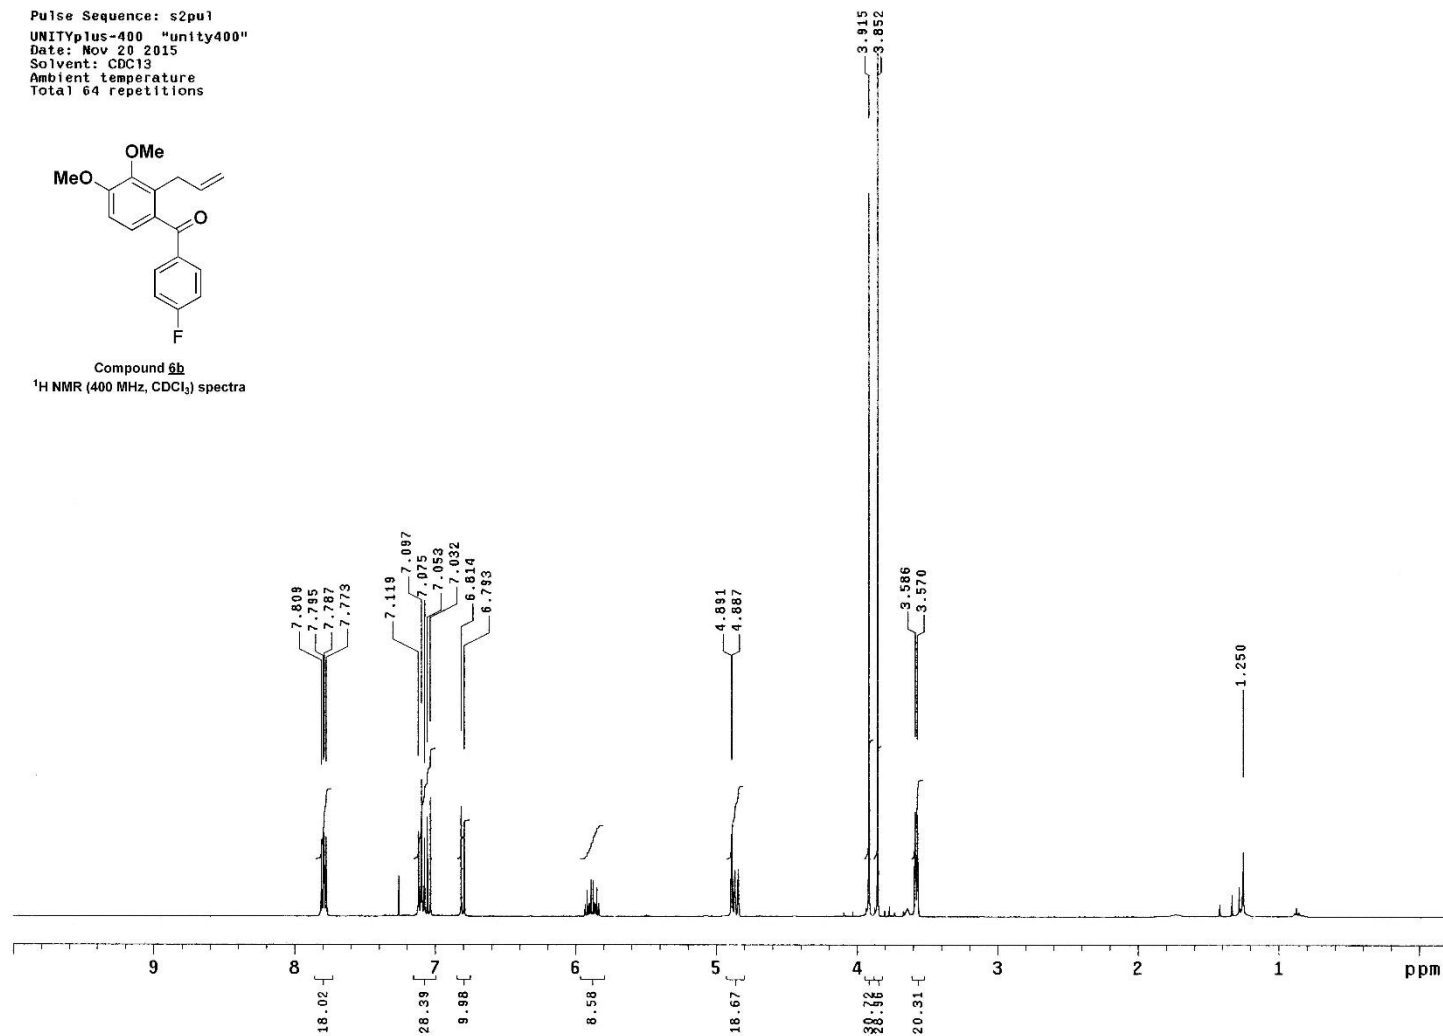

# Compound 6b

YLenon2b

Pulse Sequence: s2pu1  
 UNITYplus-400 "unity400"  
 Date: Nov 20 2015  
 Solvent: CDCl<sub>3</sub>  
 Ambient temperature  
 Total 64 repetitions

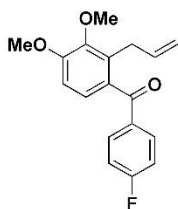

Compound **6b**

<sup>1</sup>H NMR (400 MHz, CDCl<sub>3</sub>) spectra

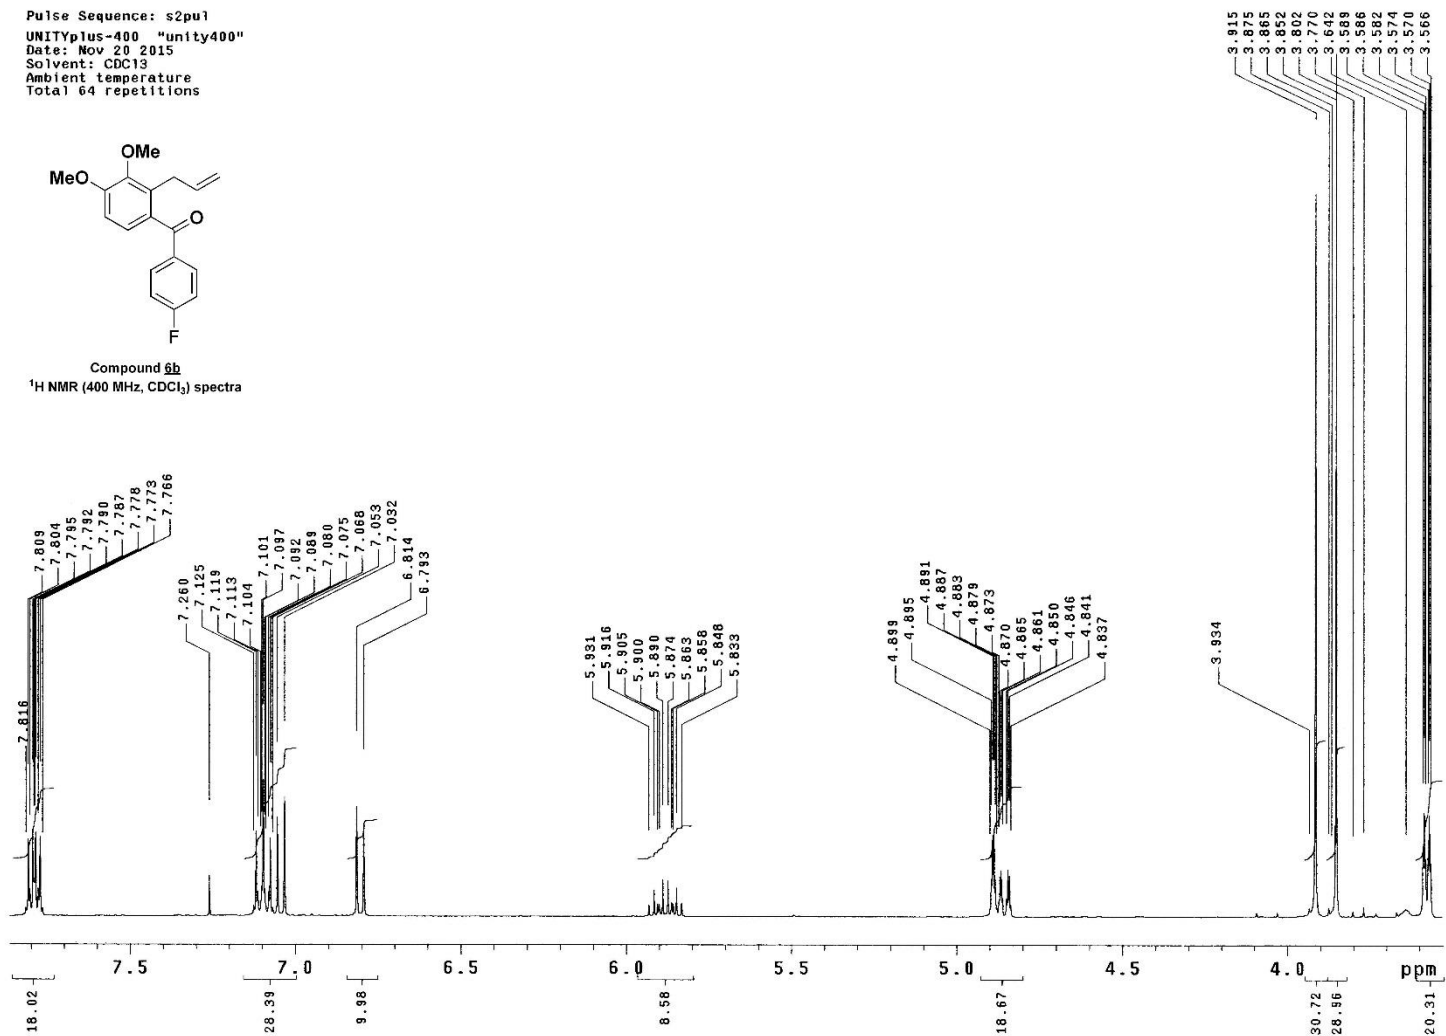

## Compound 6b

YLenon2b

Pulse Sequence: s2pu1

UNITYplus-400 "unity400"

Date: Nov 20 2015

Solvent: CDCl<sub>3</sub>

Ambient temperature

Total 1360 repetitions

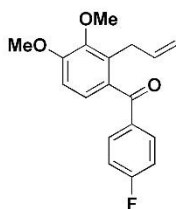

Compound 6b

<sup>13</sup>C NMR (100 MHz, CDCl<sub>3</sub>) spectra

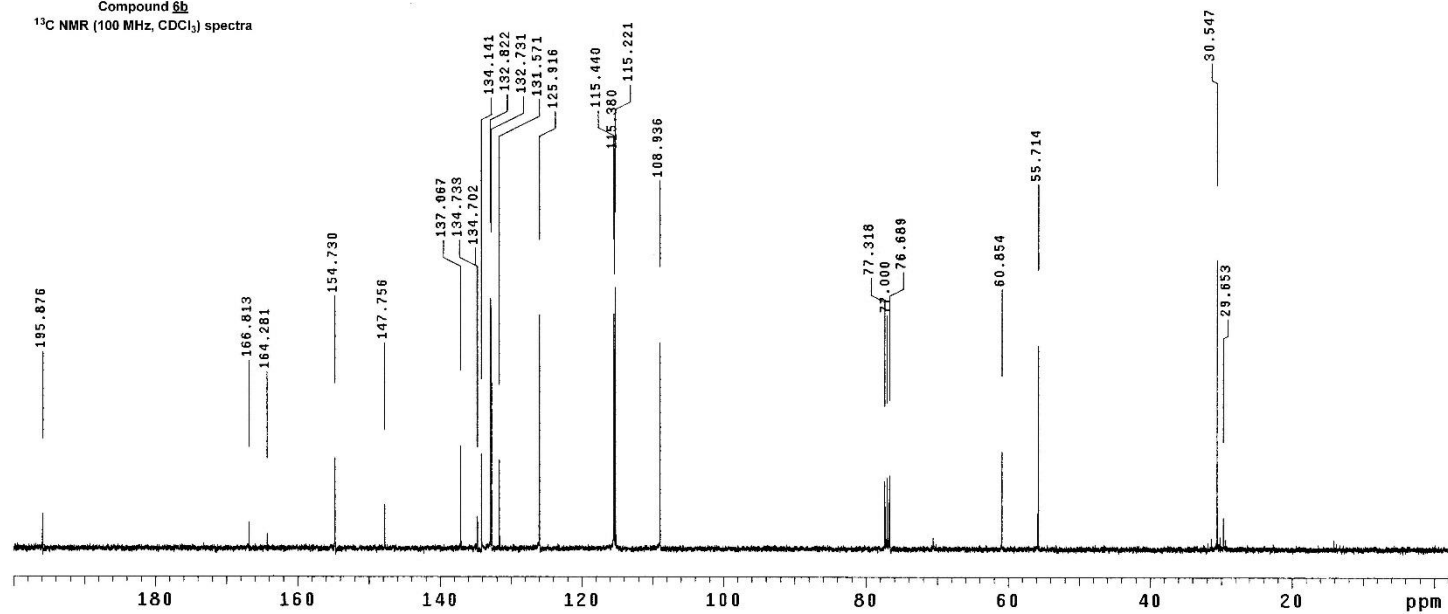



## Compound 6c

YLenon2c

Pulse Sequence: s2pul

UNITYplus-400 "unity400"

Date: Nov 20 2015

Solvent: CDCl<sub>3</sub>

Ambient temperature

Total 64 repetitions

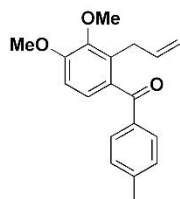

Compound **6c**  
<sup>1</sup>H NMR (400 MHz, CDCl<sub>3</sub>) spectra

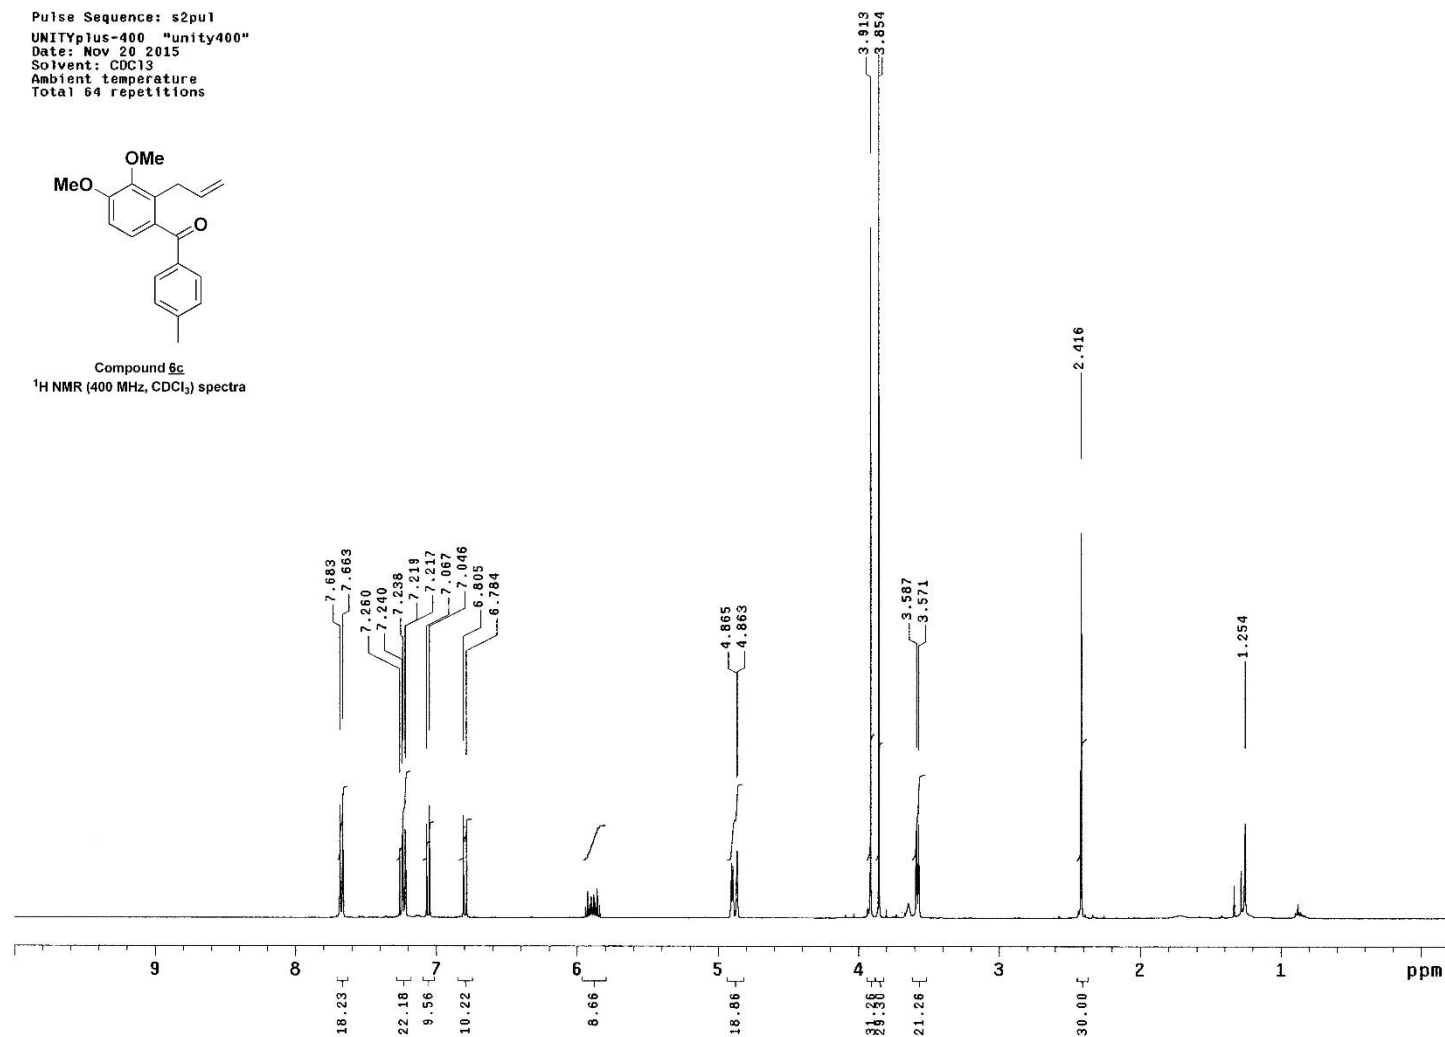

# Compound 6c

YLenon2c  
Pulse Sequence: s2pul  
UNITYplus-400 "unity400"  
Date: Nov 20 2015  
Solvent: CDCl<sub>3</sub>  
Ambient temperature  
Total 64 repetitions

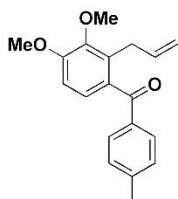

Compound 6c  
<sup>1</sup>H NMR (400 MHz, CDCl<sub>3</sub>) spectra

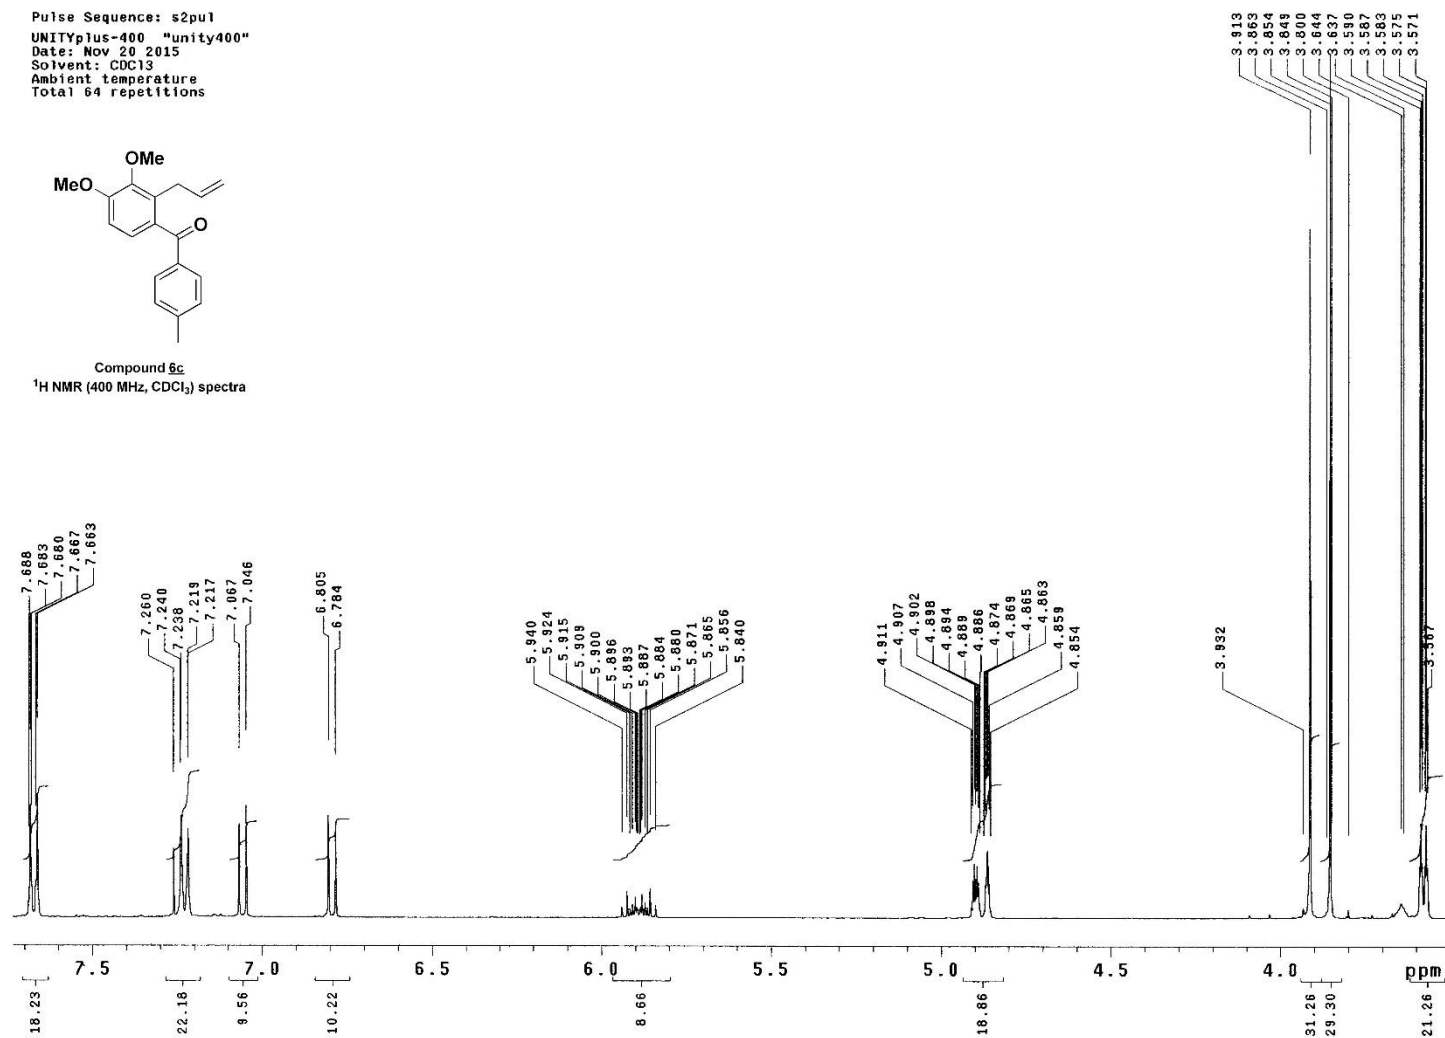

## Compound 6c

YLenon2c

Pulse Sequence: s2pu1

UNITYplus-400 "unity400"

Date: Nov 20 2015

Solvent: CDCl<sub>3</sub>

Ambient temperature

Total 1040 repetitions

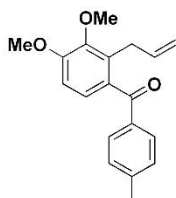

Compound 6c  
<sup>13</sup>C NMR (100 MHz, CDCl<sub>3</sub>) spectra

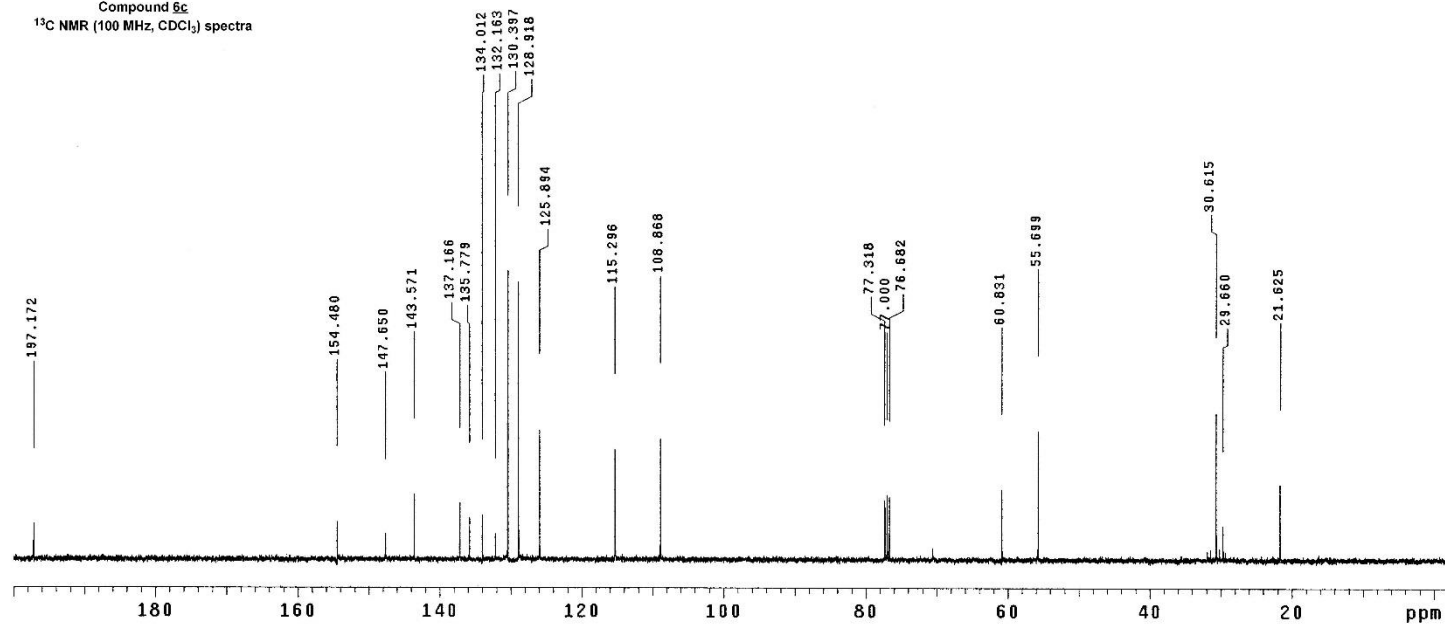

## Compound 6d

YLenon2d

Pulse Sequence: s2pu1

UNITYplus-400 "unity400"

Date: Nov 23 2015

Solvent: CDCl<sub>3</sub>

Ambient temperature

Total 64 repetitions

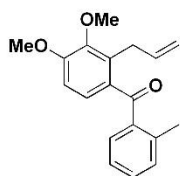

Compound 6d

<sup>1</sup>H NMR (400 MHz, CDCl<sub>3</sub>) spectra

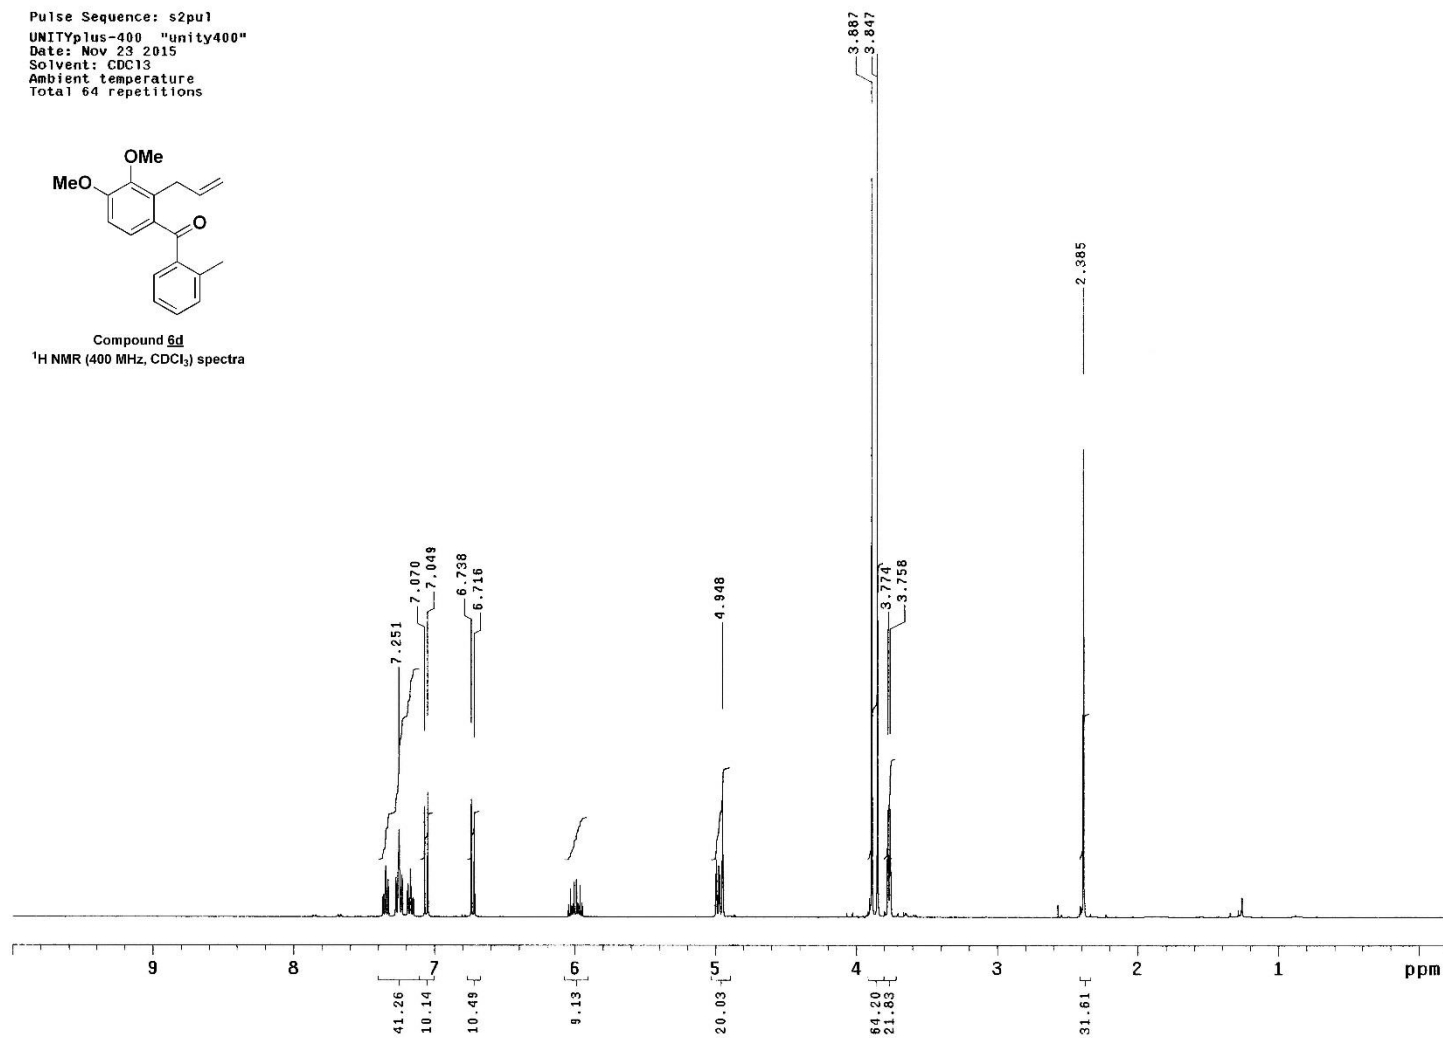

# Compound 6d

YLenon2d  
Pulse Sequence: s2pu1  
UNITYplus-400 "unity400"  
Date: Nov 23 2015  
Solvent: CDCl<sub>3</sub>  
Ambient temperature  
Total 64 repetitions

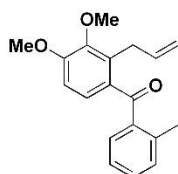

Compound **6d**  
<sup>1</sup>H NMR (400 MHz, CDCl<sub>3</sub>) spectra

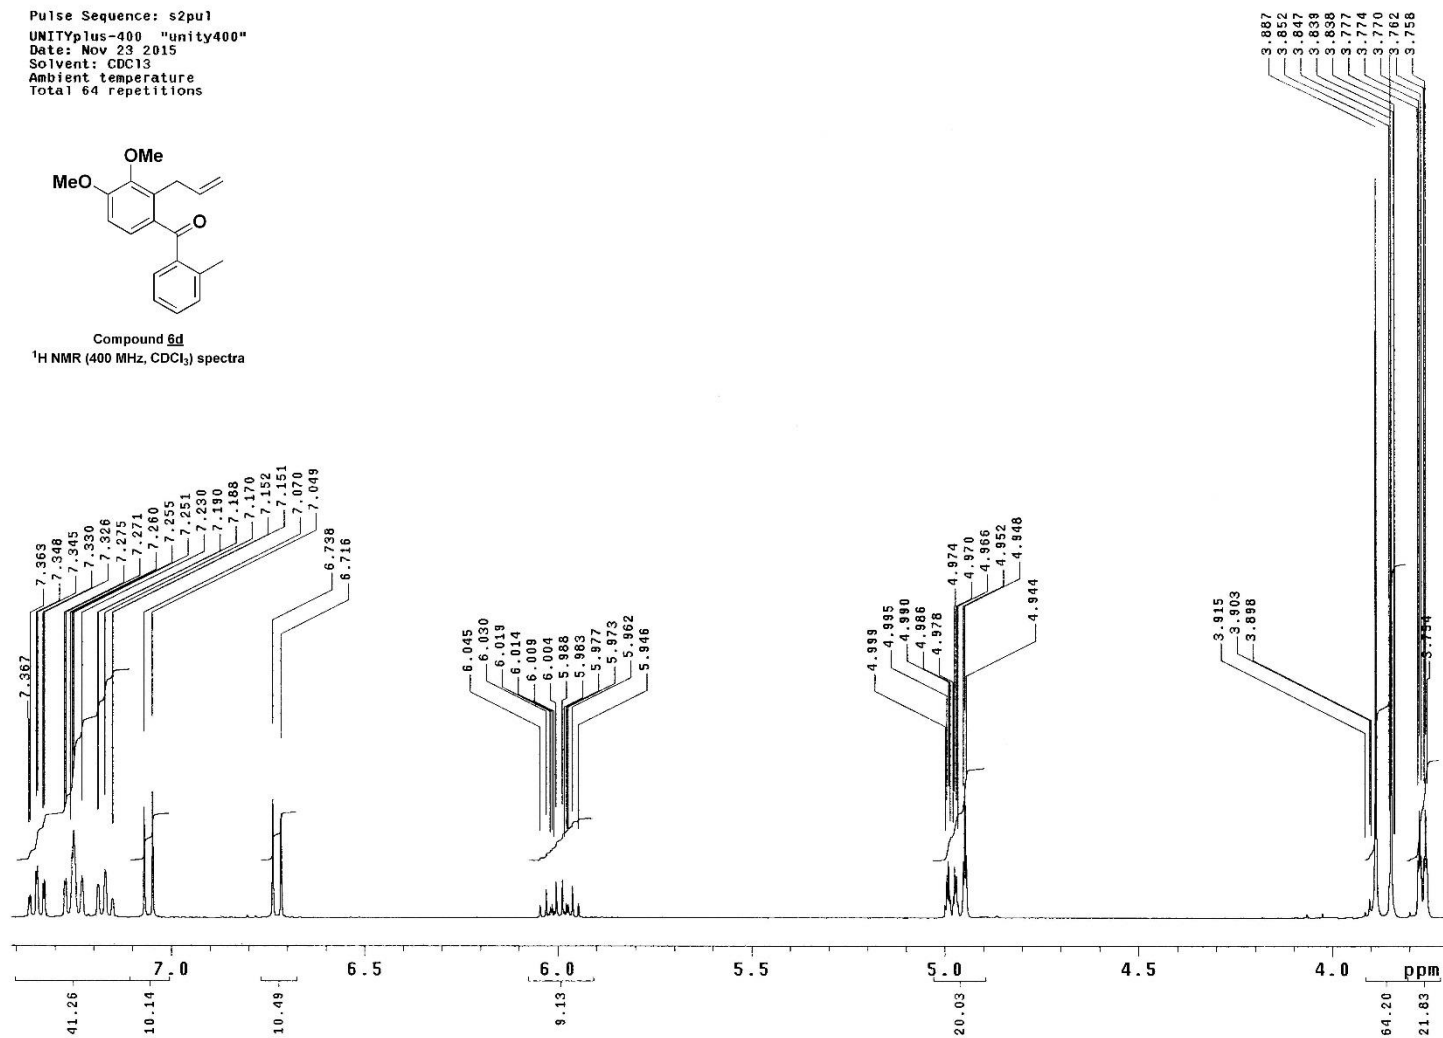

## Compound 6d

YLenon2d

Pulse Sequence: s2pul  
UNITYplus-400 "unity400"  
Date: Nov 23 2015  
Solvent: CDCl<sub>3</sub>  
Ambient temperature  
Total 224 repetitions

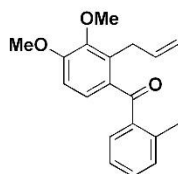

Compound 6d

<sup>13</sup>C NMR (100 MHz, CDCl<sub>3</sub>) spectra

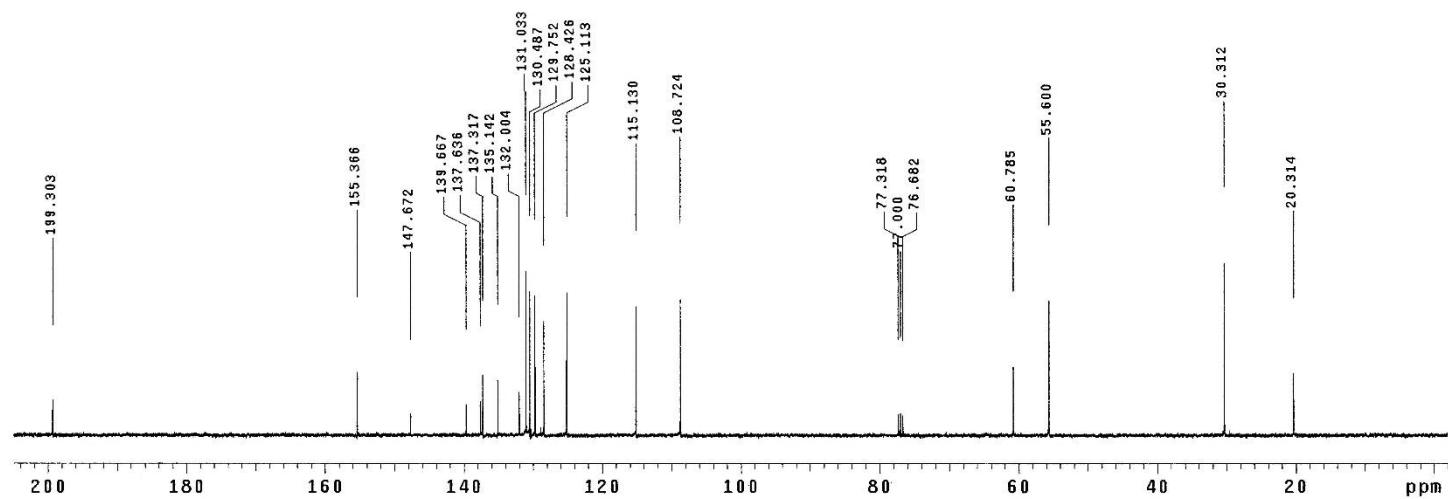

## Compound 6d

YLenon2d

Pulse Sequence: s2pu1  
UNITYplus-400 "unity400"  
Date: Nov 23 2015  
Solvent: CDCl<sub>3</sub>  
Ambient temperature  
Total 224 repetitions

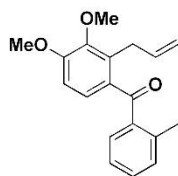

Compound 6d

<sup>13</sup>C NMR (100 MHz, CDCl<sub>3</sub>) spectra

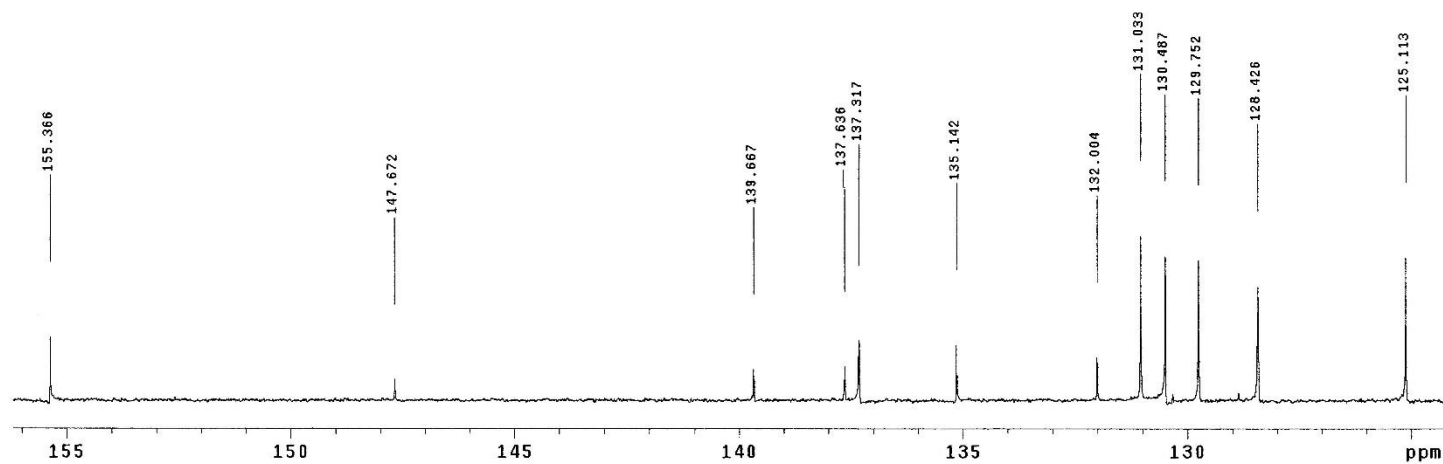

## Compound 6e

YLenon2e

Pulse Sequence: s2pul  
UNITYplus-400 "unity400"  
Date: Nov 2 2015  
Solvent: CDCl<sub>3</sub>  
Ambient temperature  
Total 64 repetitions

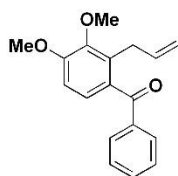

Compound 6e

<sup>1</sup>H NMR (400 MHz, CDCl<sub>3</sub>) spectra

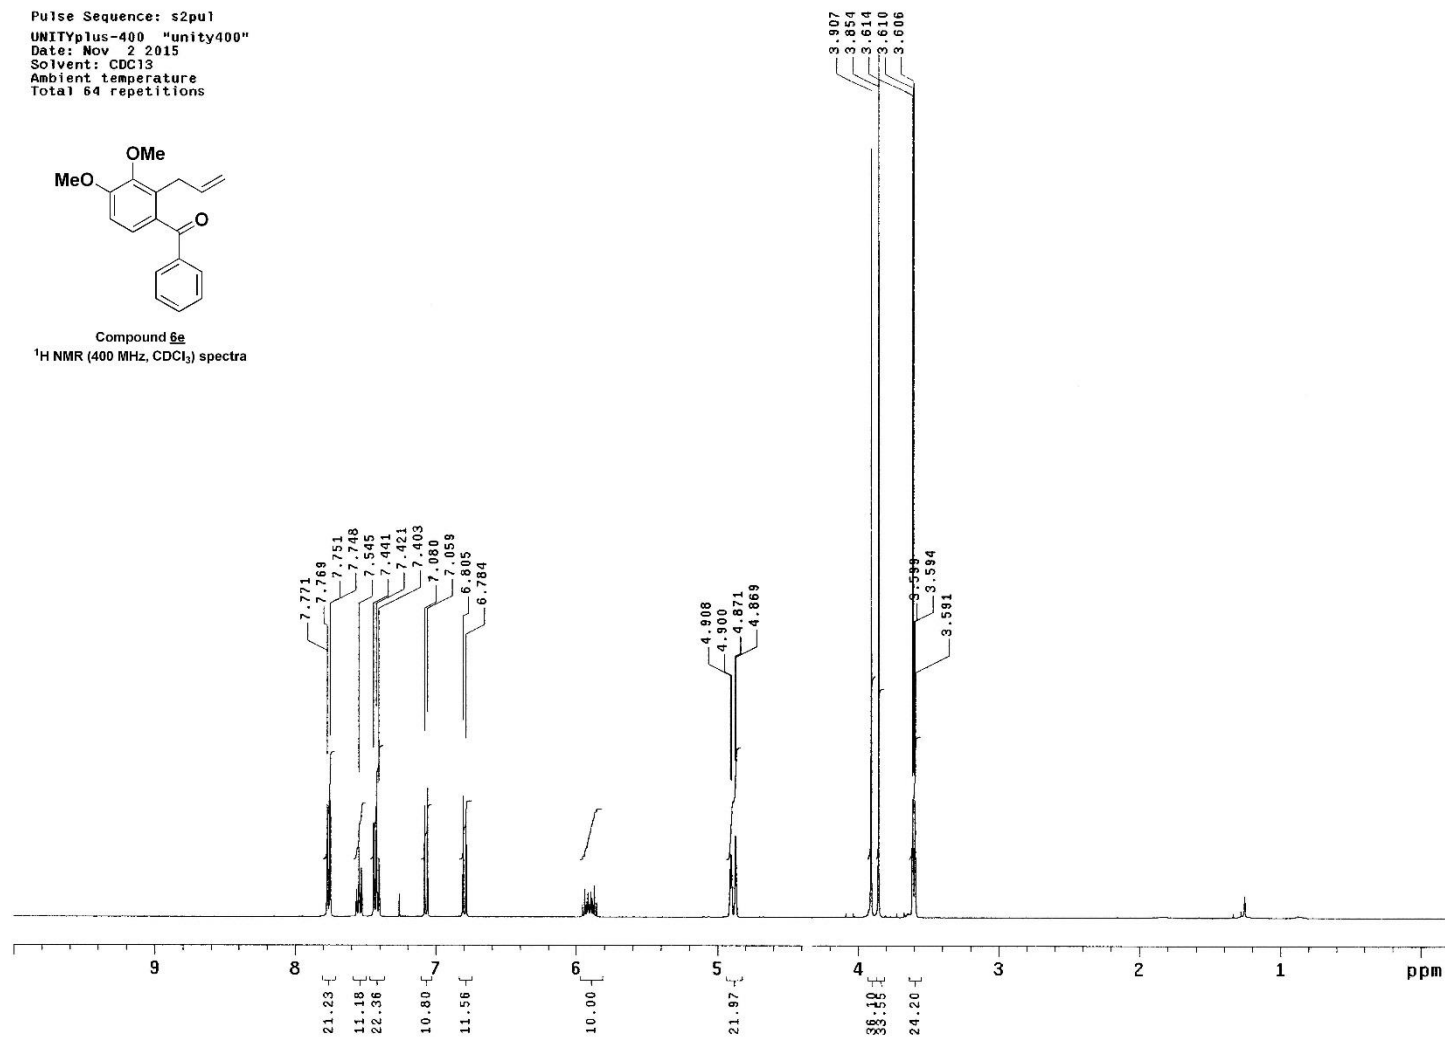



## Compound 6e

YLenon2e

Pulse Sequence: s2pul  
UNITYplus-400 "unity400"  
Date: Nov 2 2015  
Solvent: CDCl<sub>3</sub>  
Ambient temperature  
Total 64 repetitions

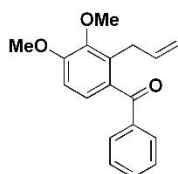

Compound 6e

<sup>1</sup>H NMR (400 MHz, CDCl<sub>3</sub>) spectra

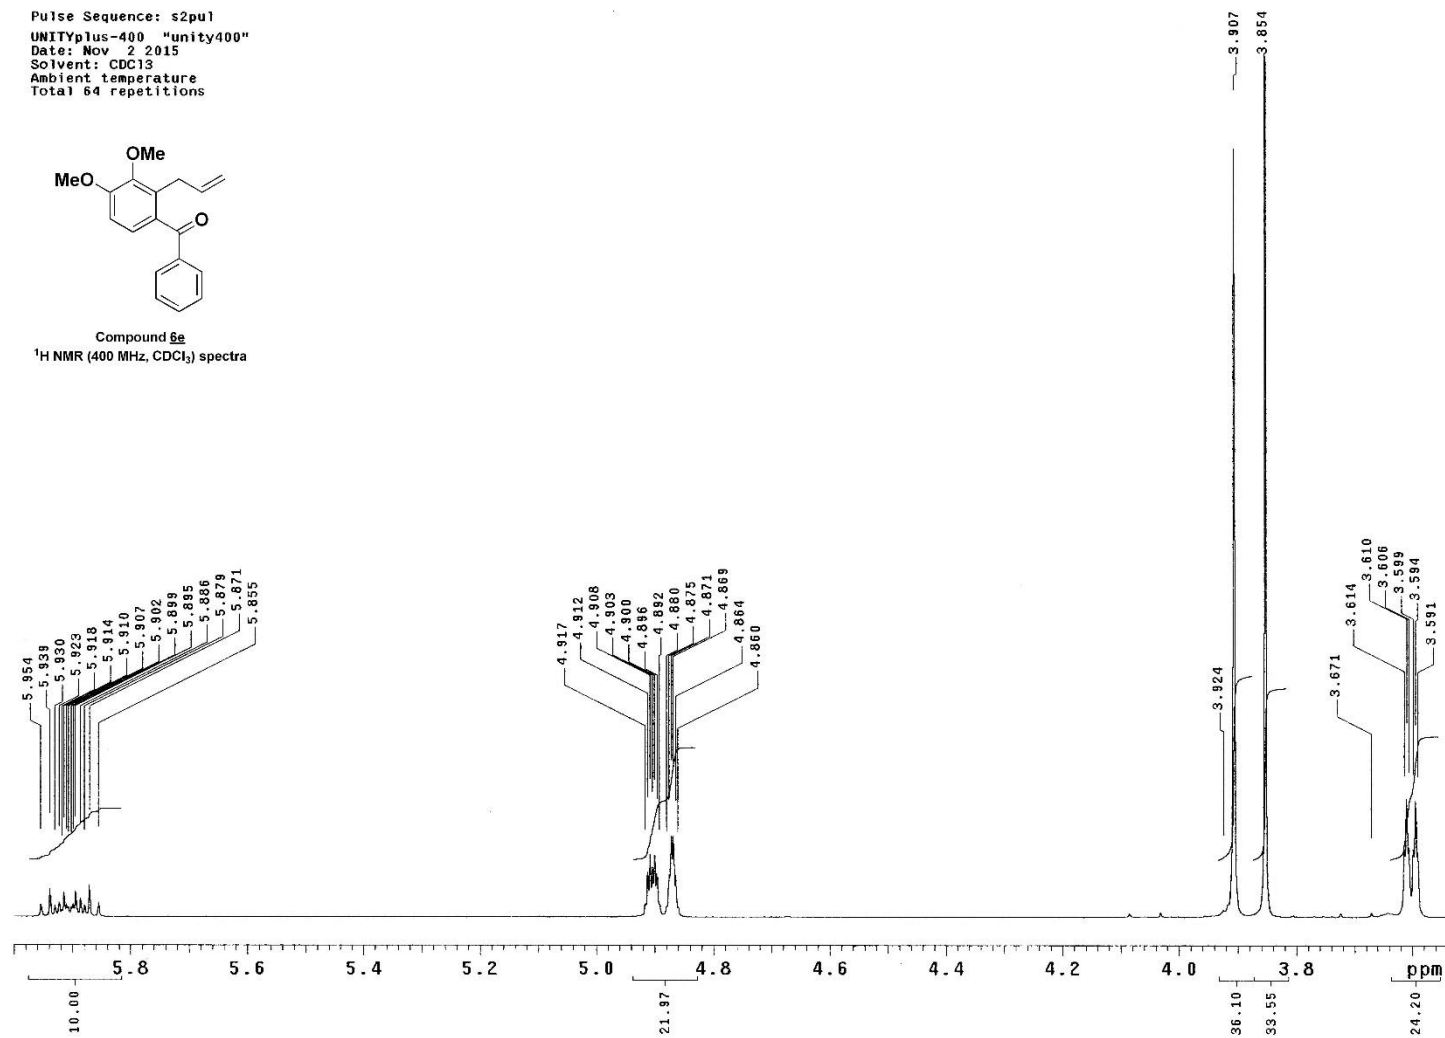

## Compound 6e

YLenon2e

Pulse Sequence: s2pul  
UNITYplus-400 "unity400"  
Date: Nov 2 2015  
Solvent: CDCl<sub>3</sub>  
Ambient temperature  
Total 64 repetitions



Compound 6e  
<sup>1</sup>H NMR (400 MHz, CDCl<sub>3</sub>) spectra

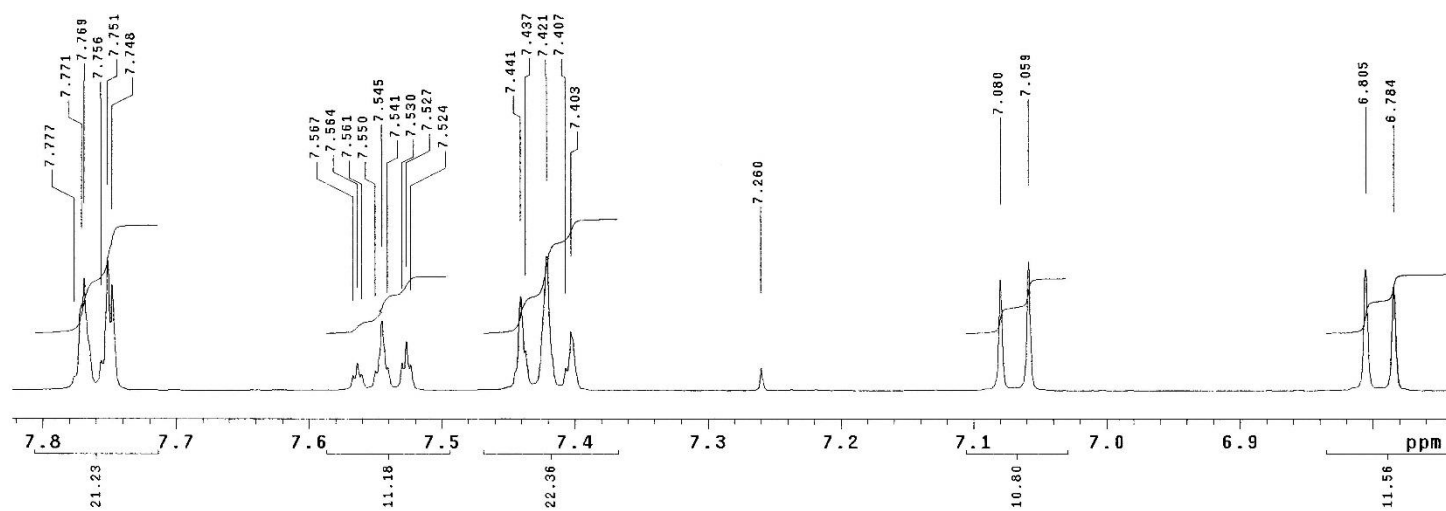

## Compound 6e

YLenon2e

Pulse Sequence: s2pu1

UNITYplus-400 "unity400"

Date: Nov 2 2015

Solvent: CDCl<sub>3</sub>

Ambient temperature

Total 2208 repetitions

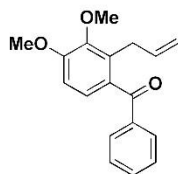

Compound 6e

<sup>13</sup>C NMR (100 MHz, CDCl<sub>3</sub>) spectra

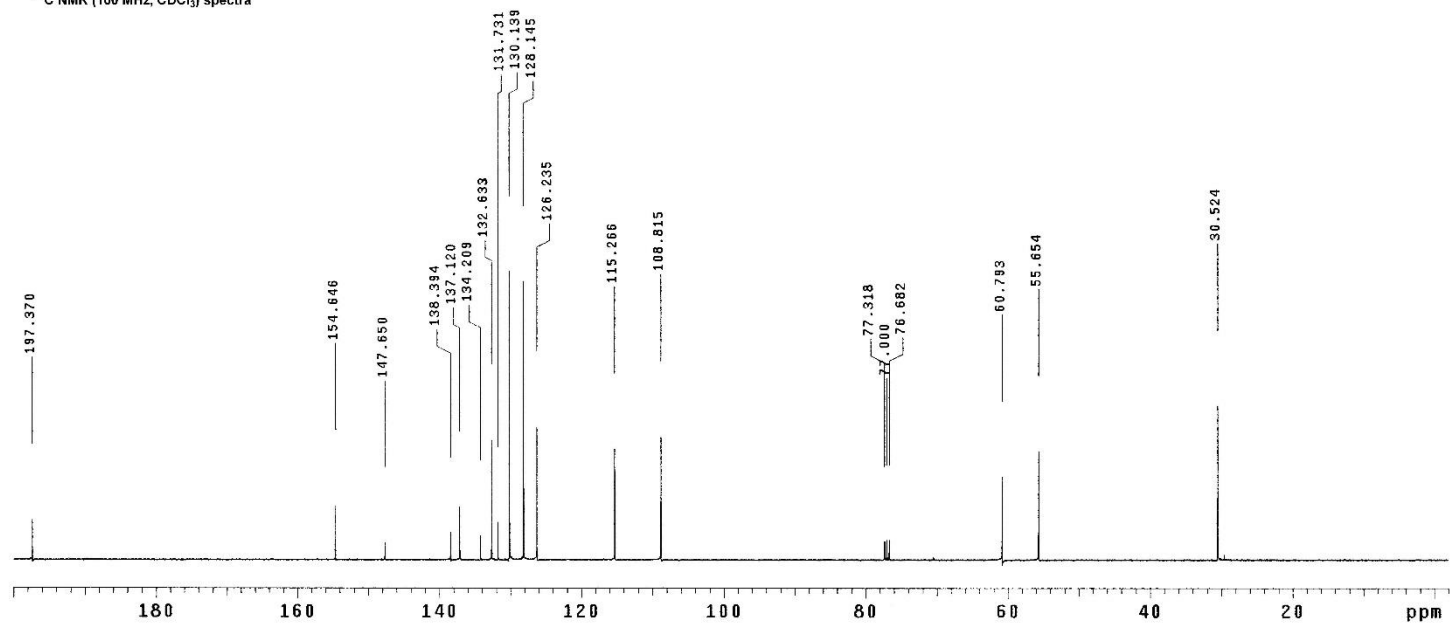

## Compound 6f

YLenon2f

Pulse Sequence: s2pu1

UNITYplus-400 "unity400"

Date: Oct 26 2015

Solvent: CDCl<sub>3</sub>

Ambient temperature

Total 64 repetitions

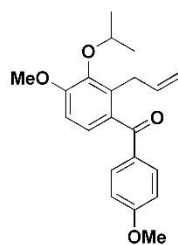

Compound 6f

<sup>1</sup>H NMR (400 MHz, CDCl<sub>3</sub>) spectra

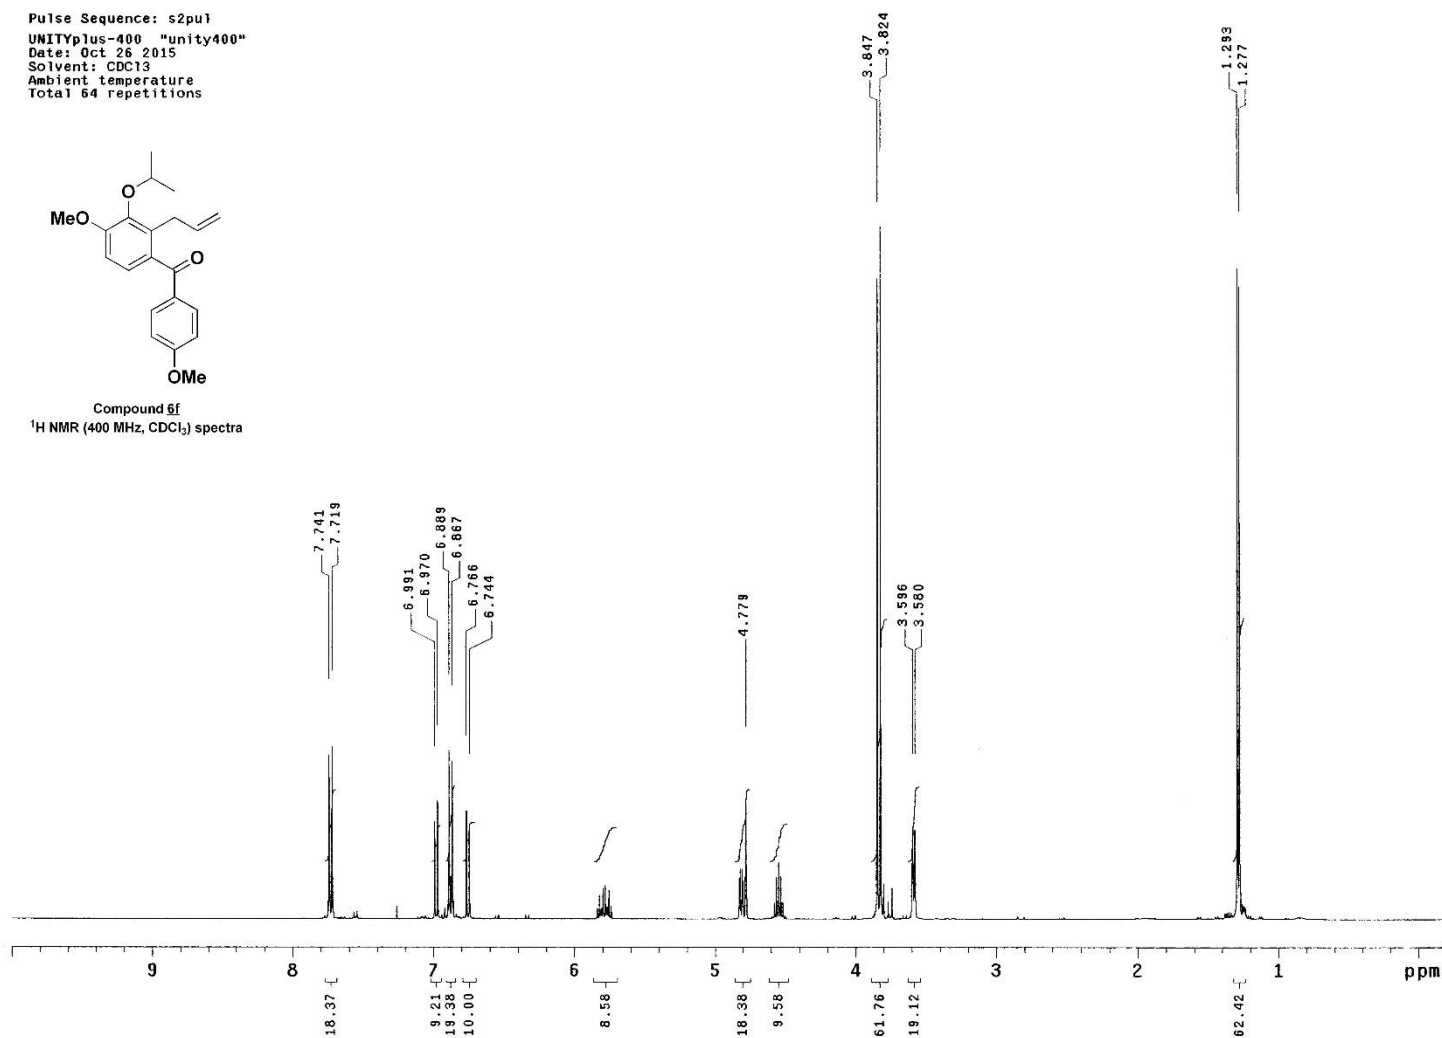

# Compound 6f

YLenon2f

Pulse Sequence: s2pu1

UNITYplus-400 "unity400"

Date: Oct 26 2015

Solvent: CDCl<sub>3</sub>

Ambient temperature

Total 64 repetitions

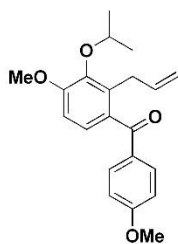

Compound 6f

<sup>1</sup>H NMR (400 MHz, CDCl<sub>3</sub>) spectra

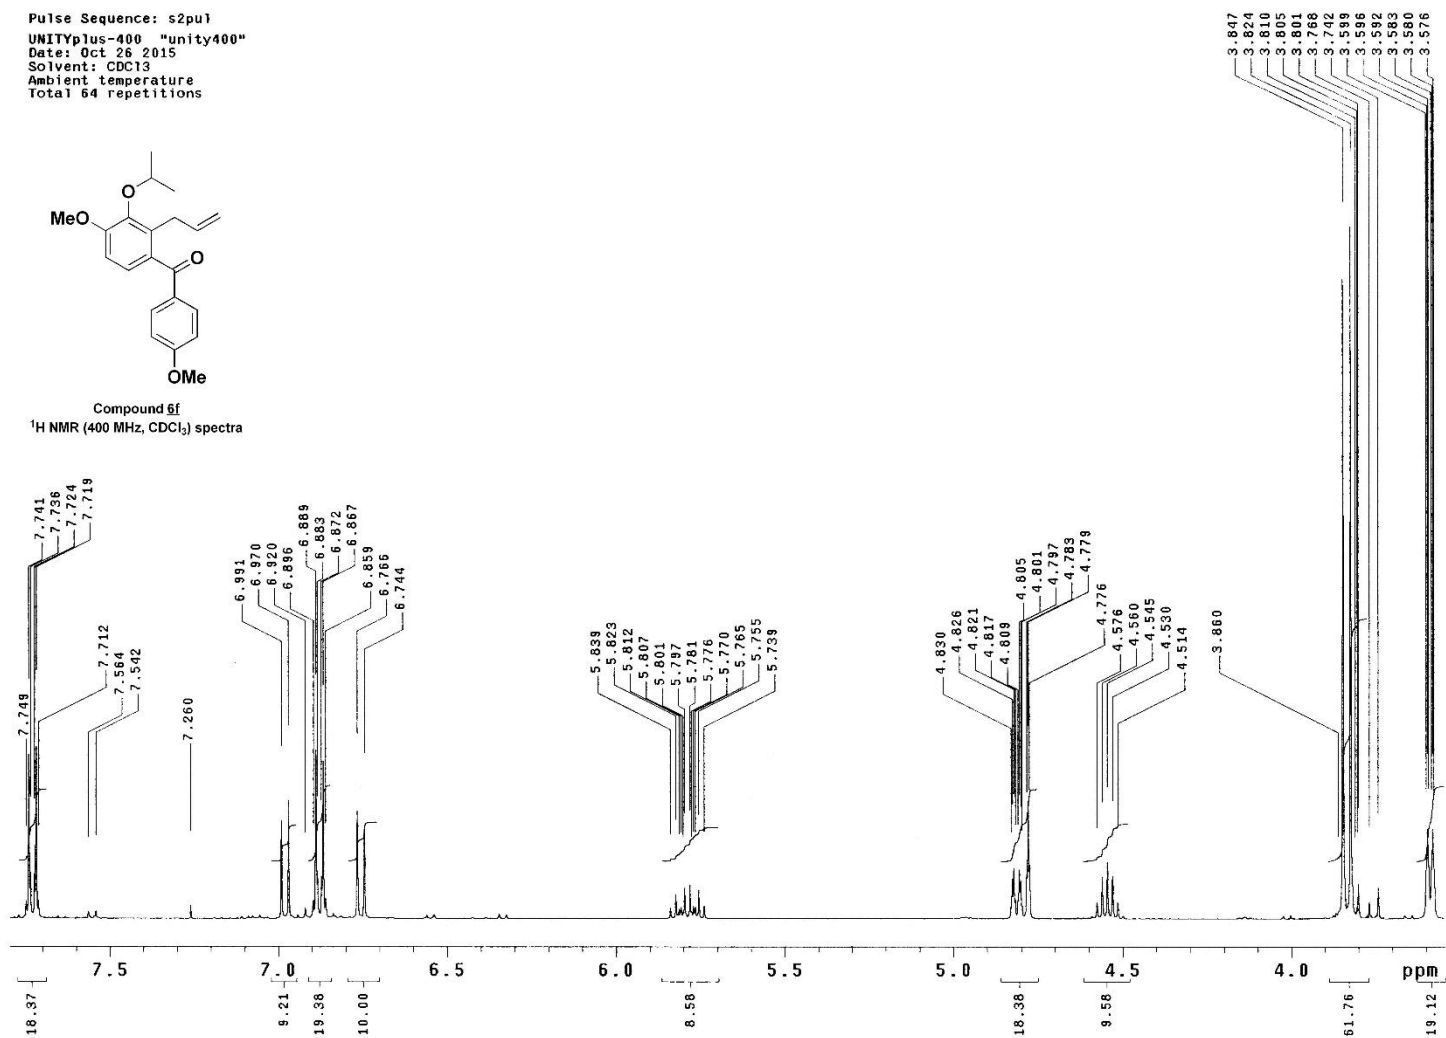

## Compound 6f

YLenon2f

Pulse Sequence: s2pu1

UNITYplus-400 "unity400"

Date: Oct 26 2015

Solvent: CDCl<sub>3</sub>

Ambient temperature

Total 3568 repetitions

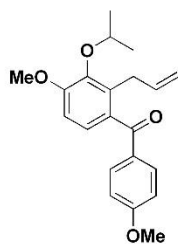

Compound 6f

<sup>13</sup>C NMR (100 MHz, CDCl<sub>3</sub>) spectra

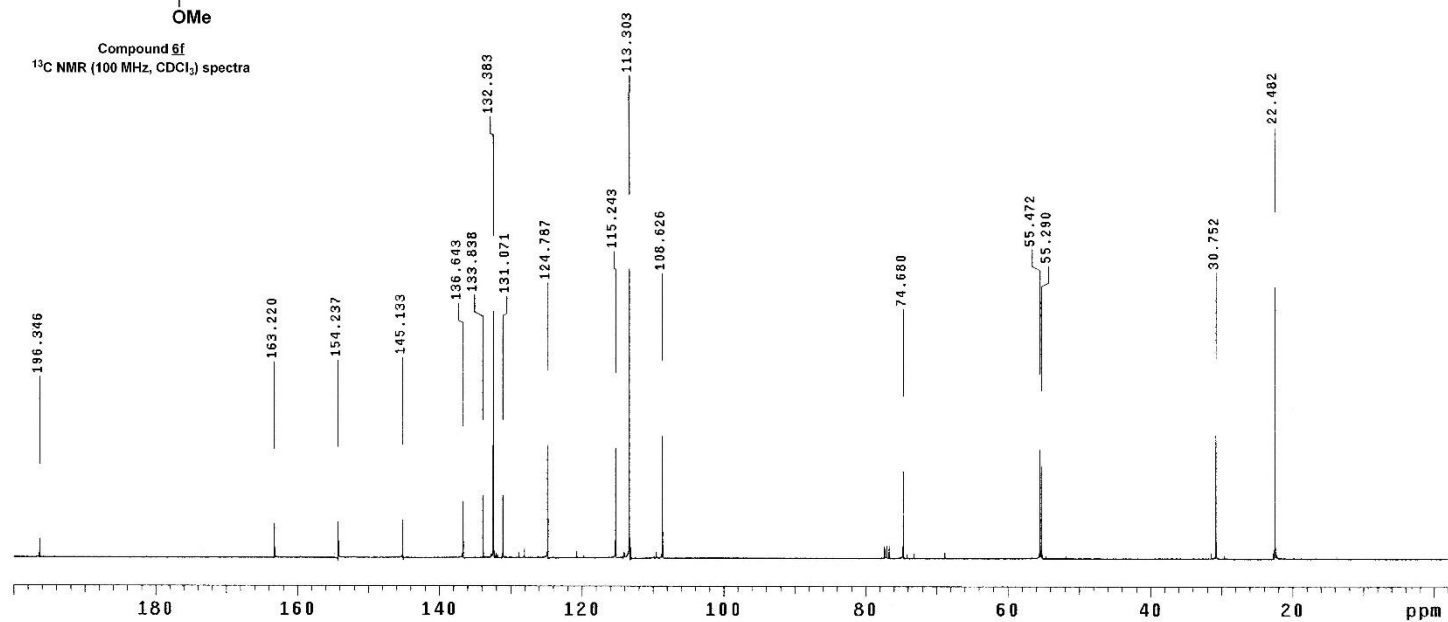

## Compound 6g

YLenon2g

Pulse Sequence: s2pu1

UNITYplus-400 "unity400"

Date: Nov 2 2015

Solvent: CDCl<sub>3</sub>

Ambient temperature

Total 64 repetitions

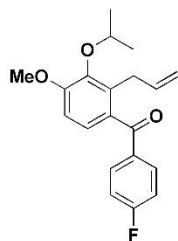

Compound **6g**

<sup>1</sup>H NMR (400 MHz, CDCl<sub>3</sub>) spectra

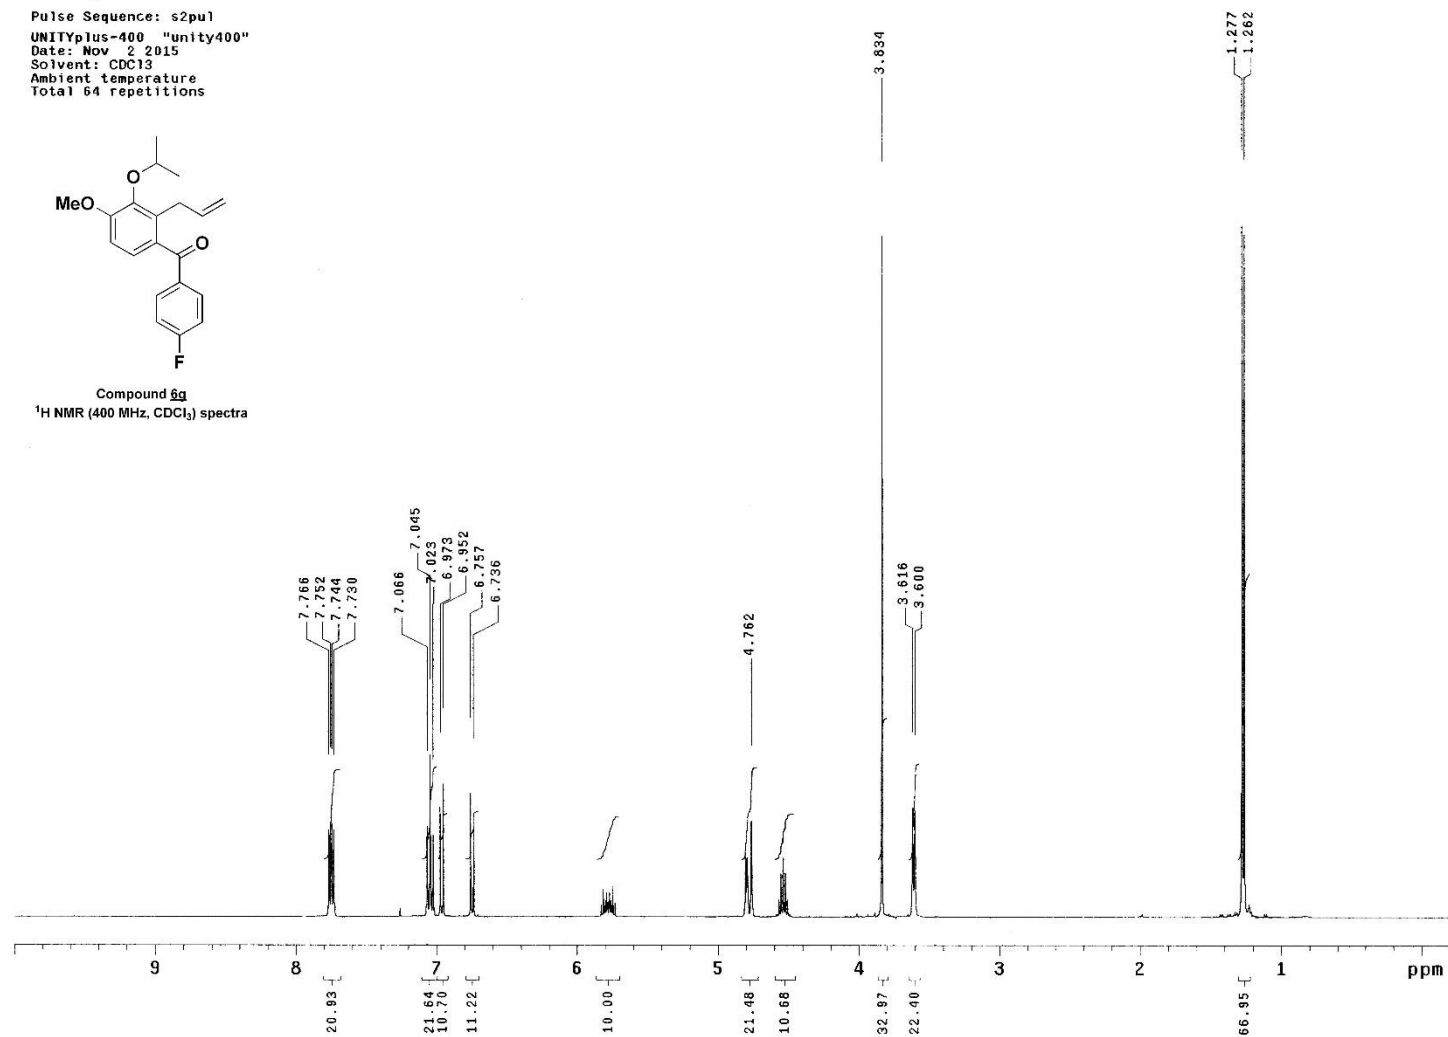

# Compound 6g

YLenon2g

Pulse Sequence: s2pu1  
 UNITYplus-400 "unity400"  
 Date: Nov 2 2015  
 Solvent: CDCl3  
 Ambient temperature  
 Total 64 repetitions

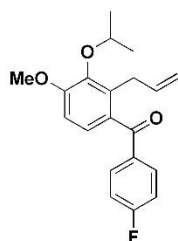

Compound 6g

<sup>1</sup>H NMR (400 MHz, CDCl<sub>3</sub>) spectra

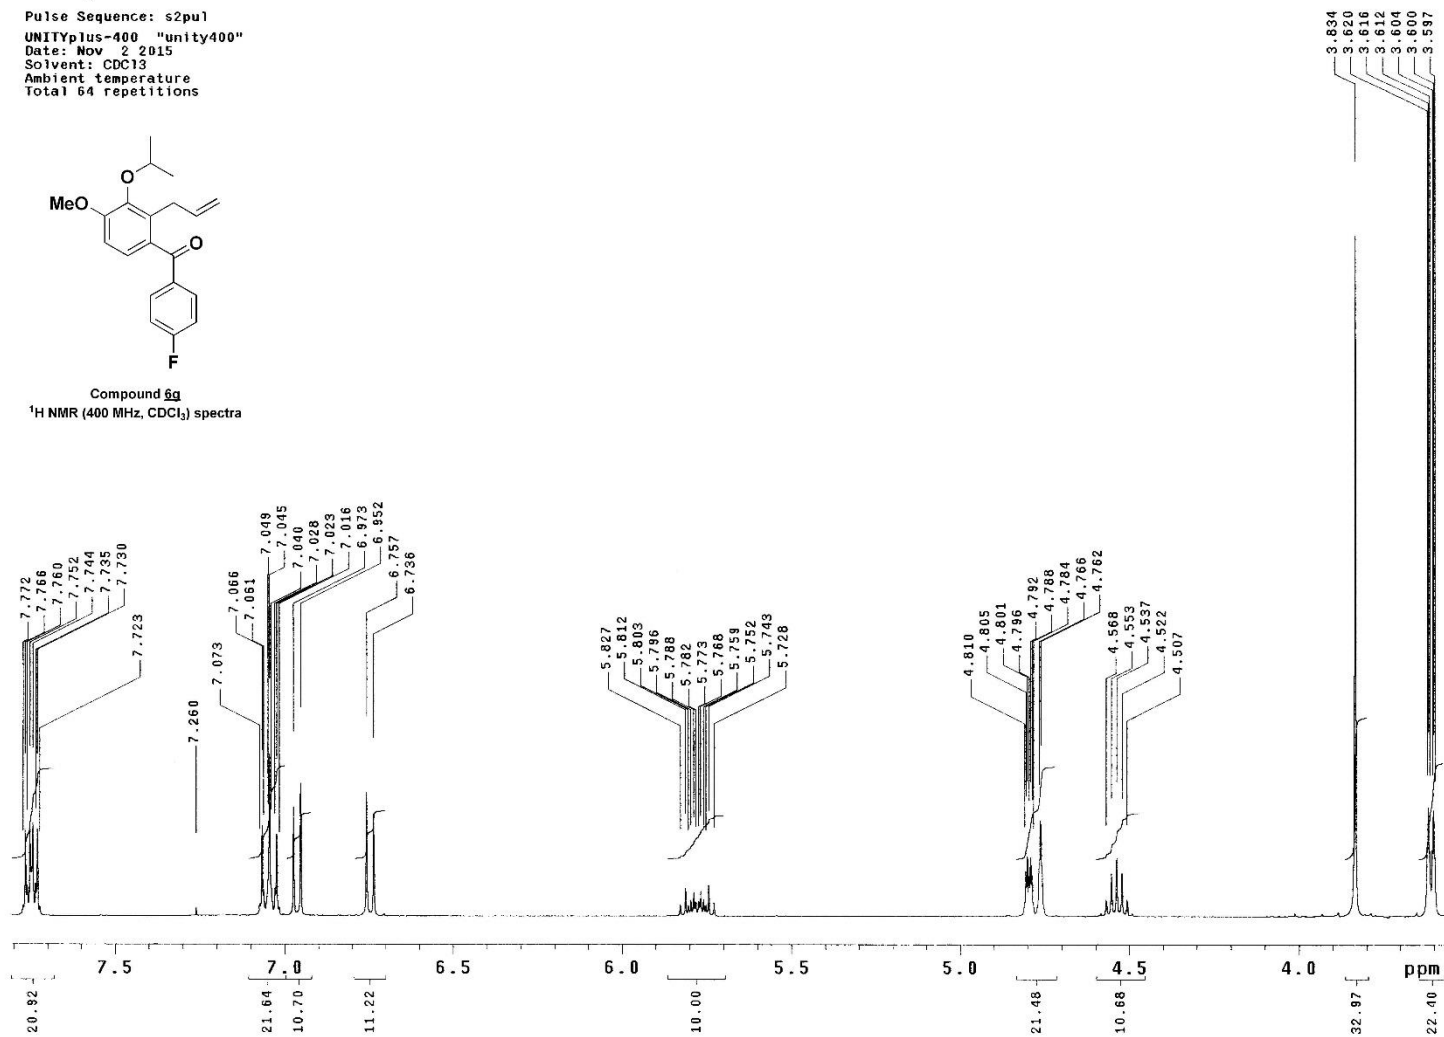



## Compound 6g

YLenon2g

Pulse Sequence: s2pu1

UNITYplus-400 "unity400"

Date: Nov 2 2015

Solvent: CDCl<sub>3</sub>

Ambient temperature

Total 1008 repetitions

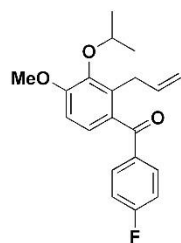

Compound 6g

<sup>13</sup>C NMR (100 MHz, CDCl<sub>3</sub>) spectra

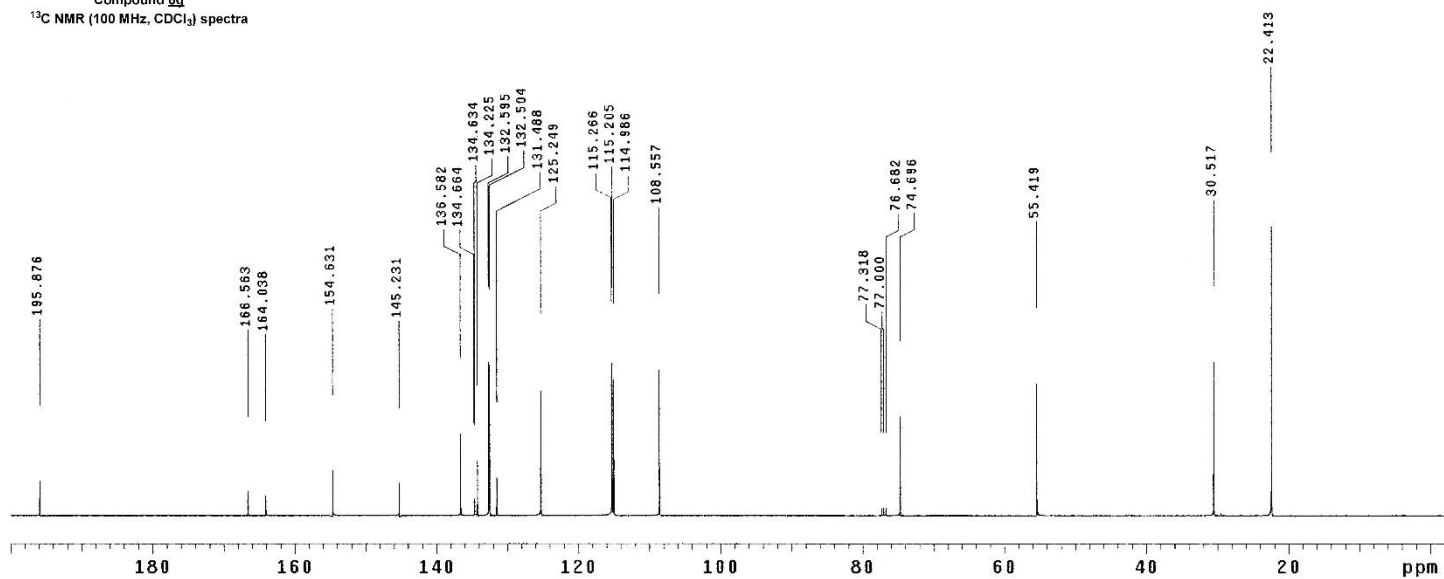

## Compound 6g

YLenon2g

Pulse Sequence: s2pu1

UNITYplus-400 "unity400"

Date: Nov 2 2015

Solvent: CDCl<sub>3</sub>

Ambient temperature

Total 1008 repetitions



Compound 6g

<sup>13</sup>C NMR (100 MHz, CDCl<sub>3</sub>) spectra

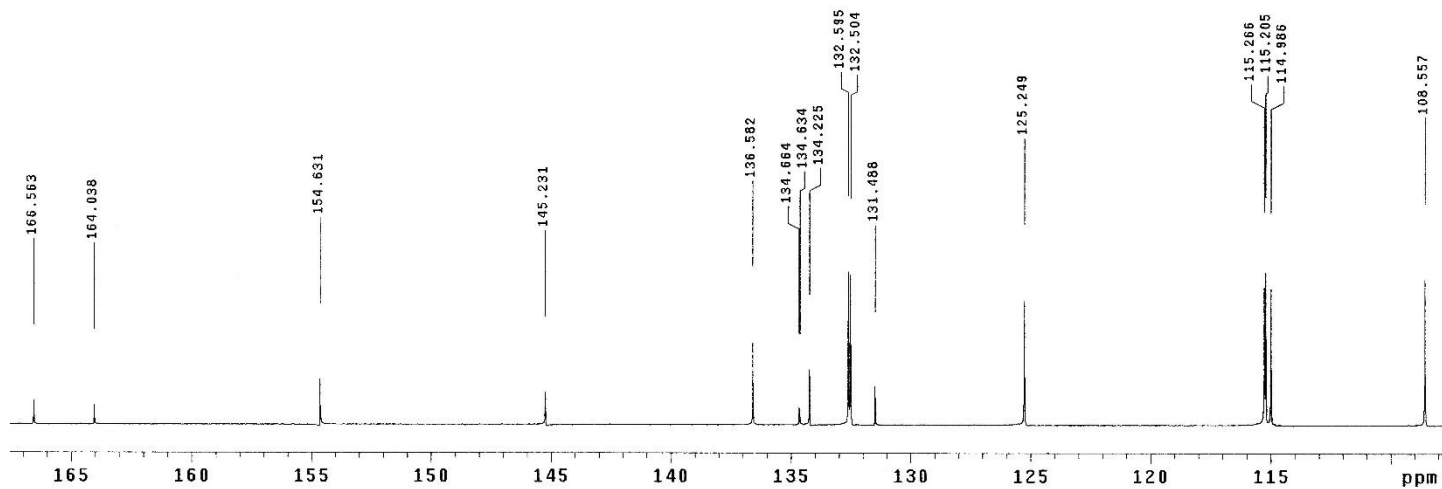

## Compound 6h

YL1041223

Pulse Sequence: s2pu1

UNITYplus-400 "unity400"

Date: Dec 25 2015

Solvent: CDCl<sub>3</sub>

Ambient temperature

Total 64 repetitions

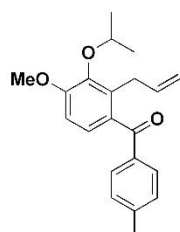

Compound 6h

<sup>1</sup>H NMR (400 MHz, CDCl<sub>3</sub>) spectra

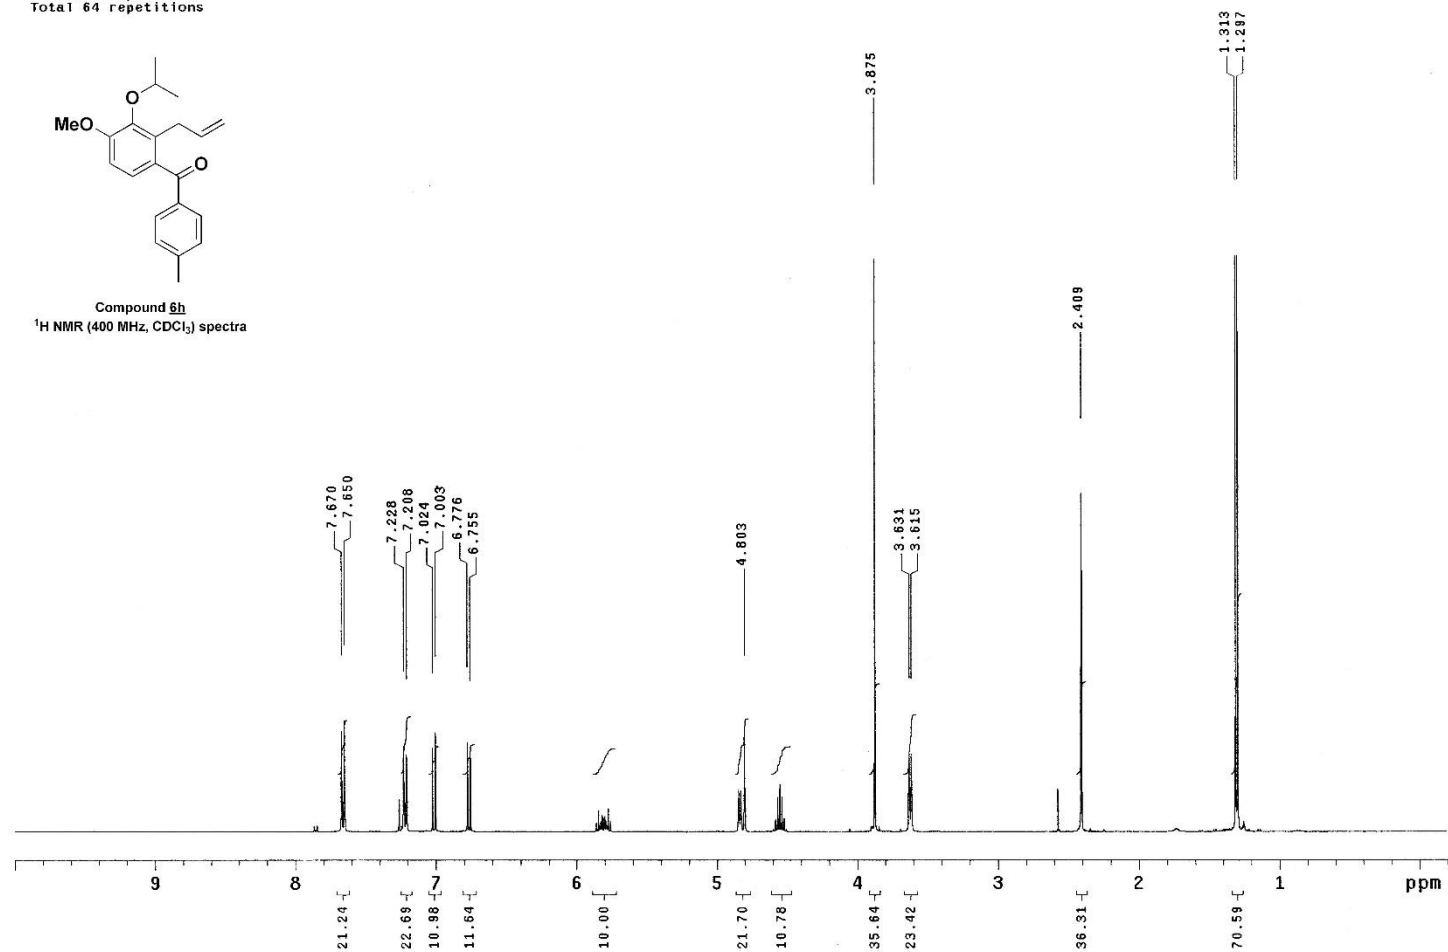

# Compound 6h

YL1041223

Pulse Sequence: s2pu1

UNITYplus-400 "unity400"

Date: Dec 25 2015

Solvent: CDCl<sub>3</sub>

Ambient temperature

Total 64 repetitions

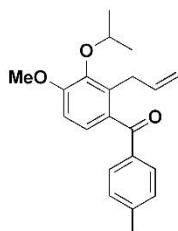

Compound 6h

<sup>1</sup>H NMR (400 MHz, CDCl<sub>3</sub>) spectra

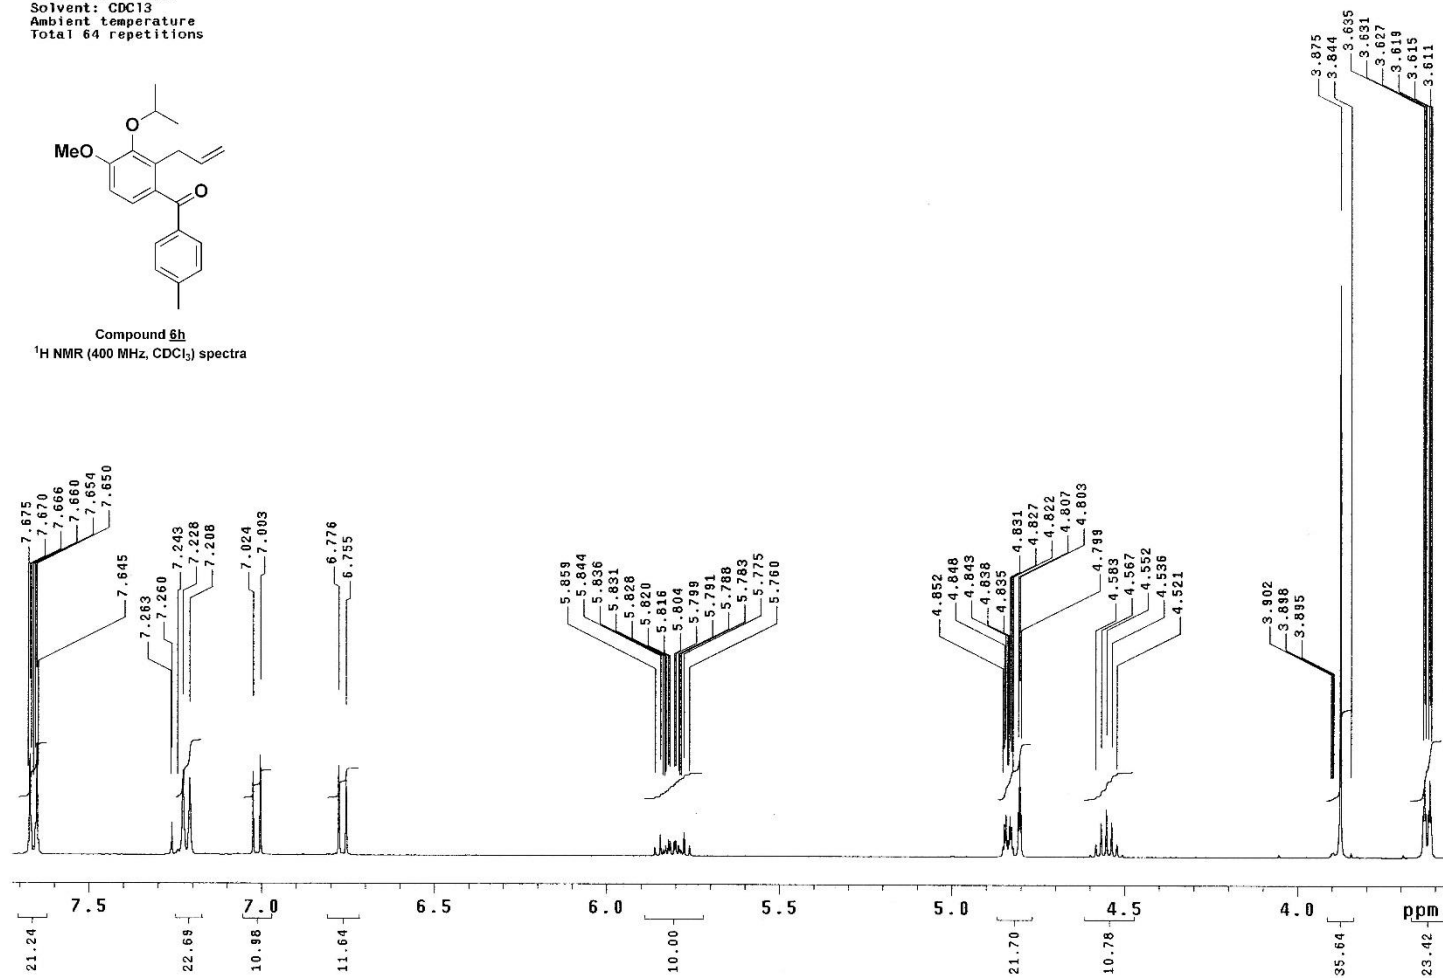

## Compound 6h

YL1041223

Pulse Sequence: s2pu1

UNITYplus-400 "unity400"

Date: Dec 25 2015

Solvent: CDCl<sub>3</sub>

Ambient Temperature

Total 448 repetitions

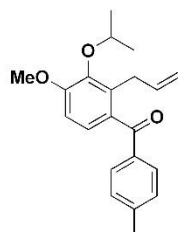

Compound 6h  
<sup>13</sup>C NMR (100 MHz, CDCl<sub>3</sub>) spectra

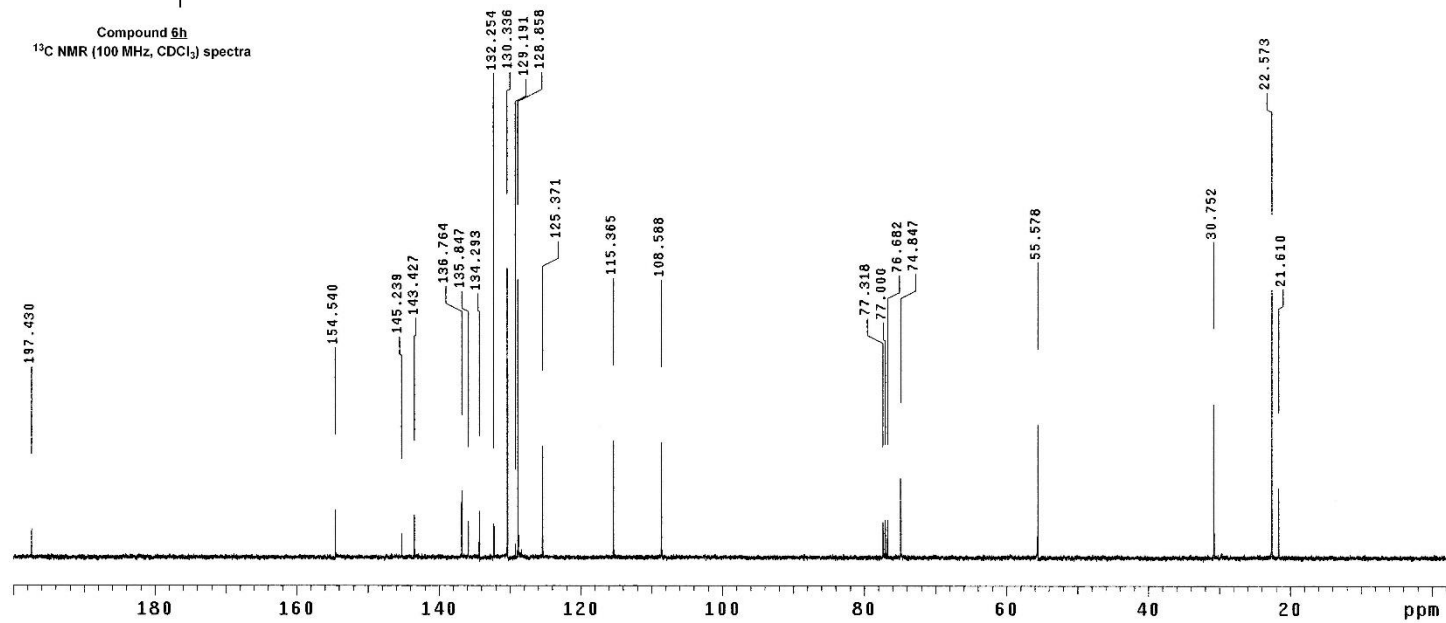

## Compound 6h

YL1041223

Pulse Sequence: s2pu1

UNITYplus-400 "unity400"

Date: Dec 25 2015

Solvent: CDCl<sub>3</sub>

Ambient Temperature

Total 448 repetitions

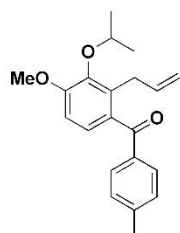

Compound 6h

<sup>13</sup>C NMR (100 MHz, CDCl<sub>3</sub>) spectra

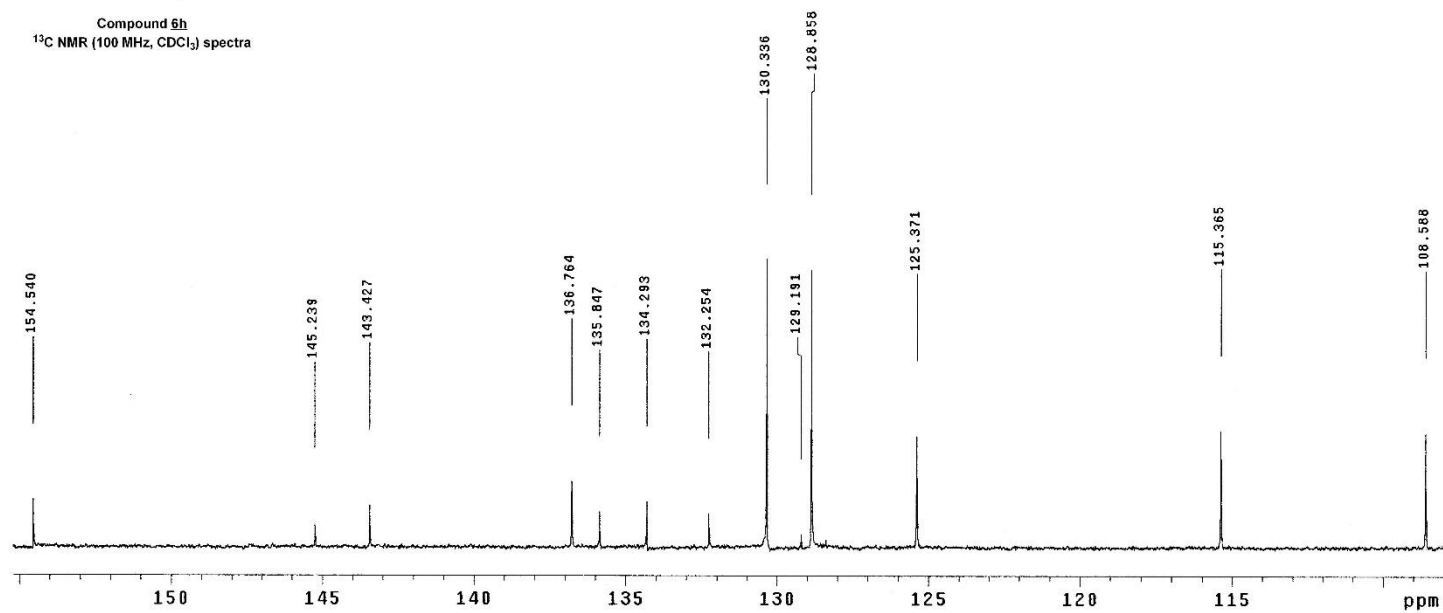

## Compound 6i

YLenon21

Pulse Sequence: s2pu1  
UNITYplus-400 "unity400"  
Date: Nov 4 2015  
Solvent: CDCl<sub>3</sub>  
Ambient temperature  
Total 64 repetitions

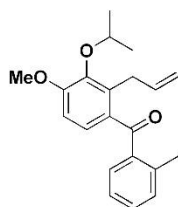

Compound 6i  
<sup>1</sup>H NMR (400 MHz, CDCl<sub>3</sub>) spectra

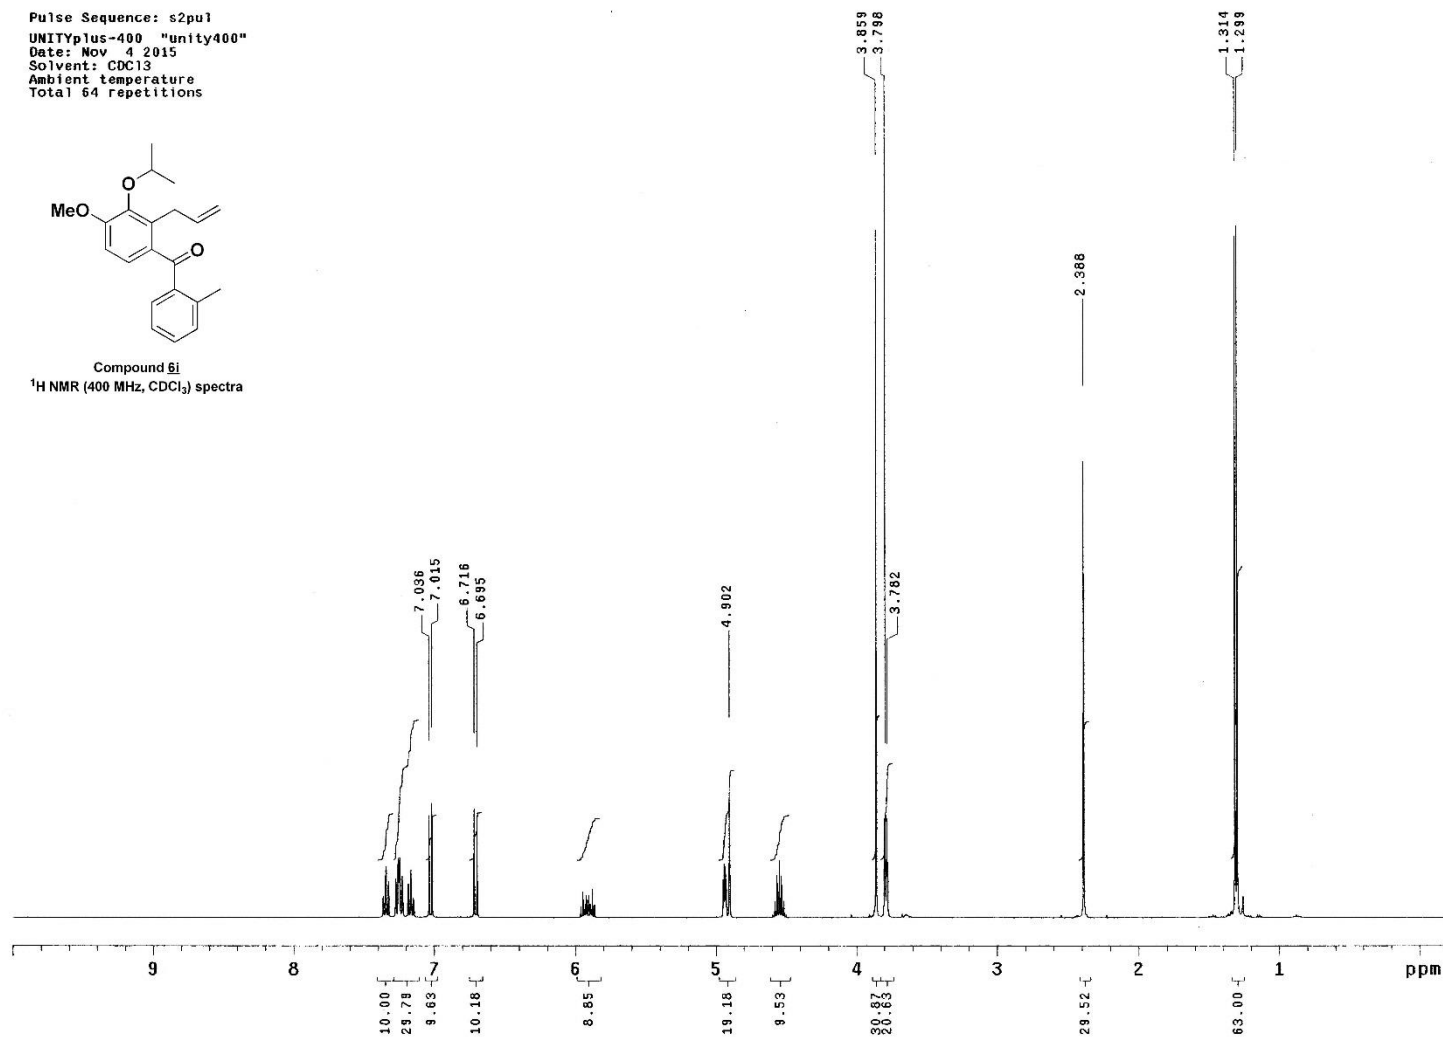

# Compound 6i

YLenon21

Pulse Sequence: s2pu1  
 UNITYplus-400 "unity400"  
 Date: Nov 4 2015  
 Solvent: CDCl3  
 Ambient temperature  
 Total 64 repetitions



Compound 6i  
<sup>1</sup>H NMR (400 MHz, CDCl<sub>3</sub>) spectra

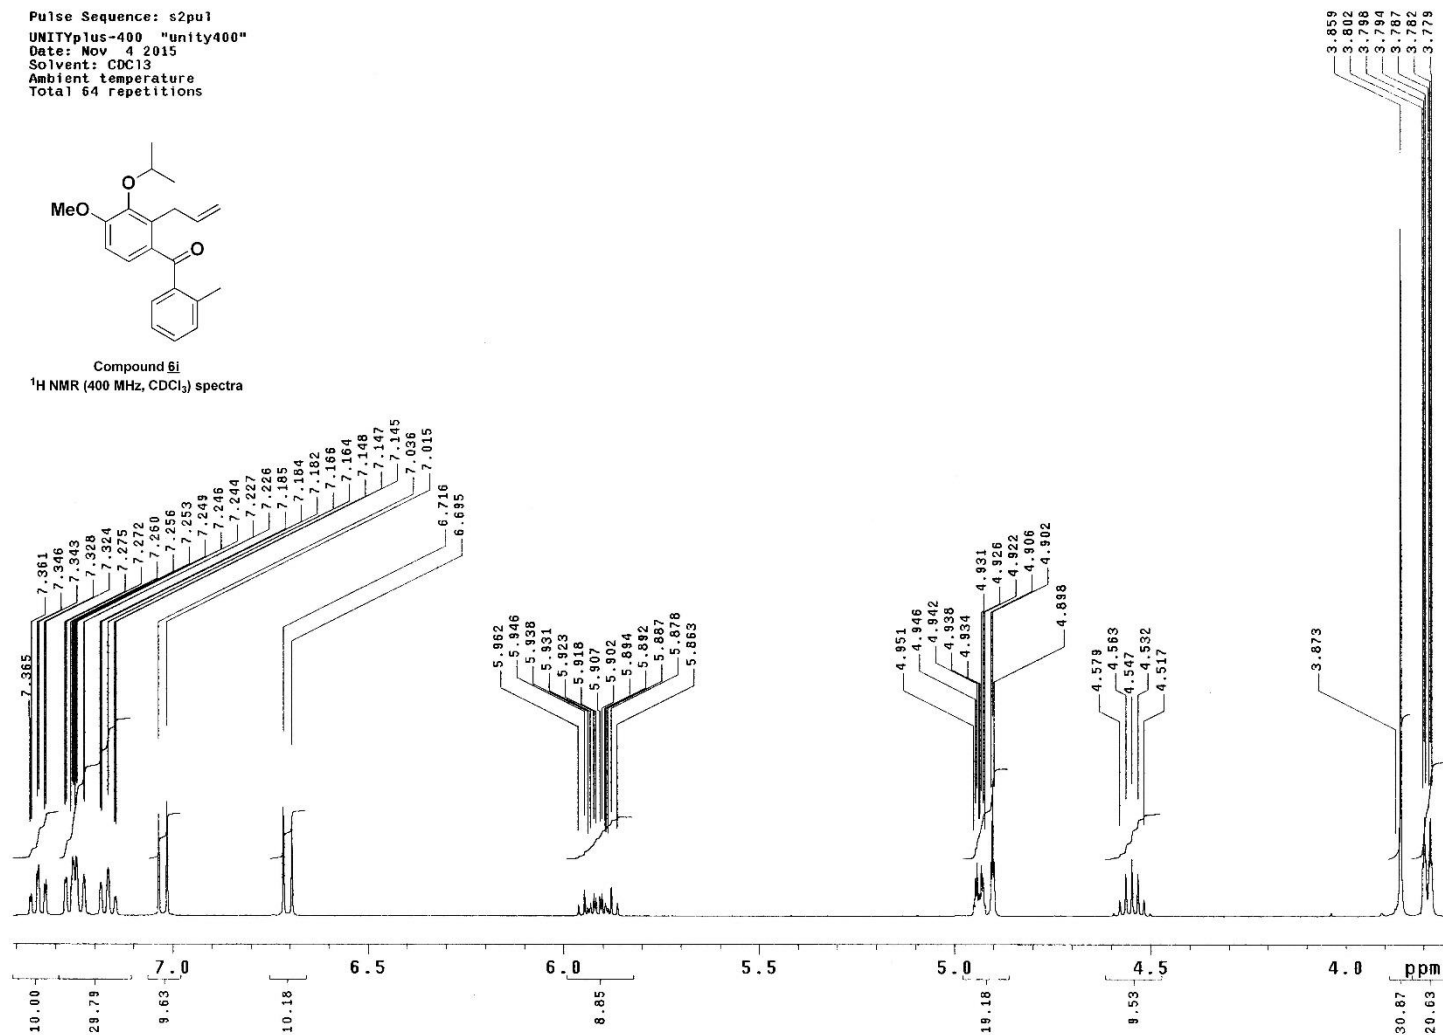



## Compound 6i

YLenon21

Pulse Sequence: s2pul  
UNITYplus-400 "unity400"  
Date: Nov 4 2015  
Solvent: CDCl<sub>3</sub>  
Ambient temperature  
Total 1696 repetitions

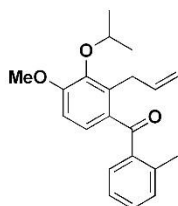

Compound 6i

<sup>13</sup>C NMR (100 MHz, CDCl<sub>3</sub>) spectra

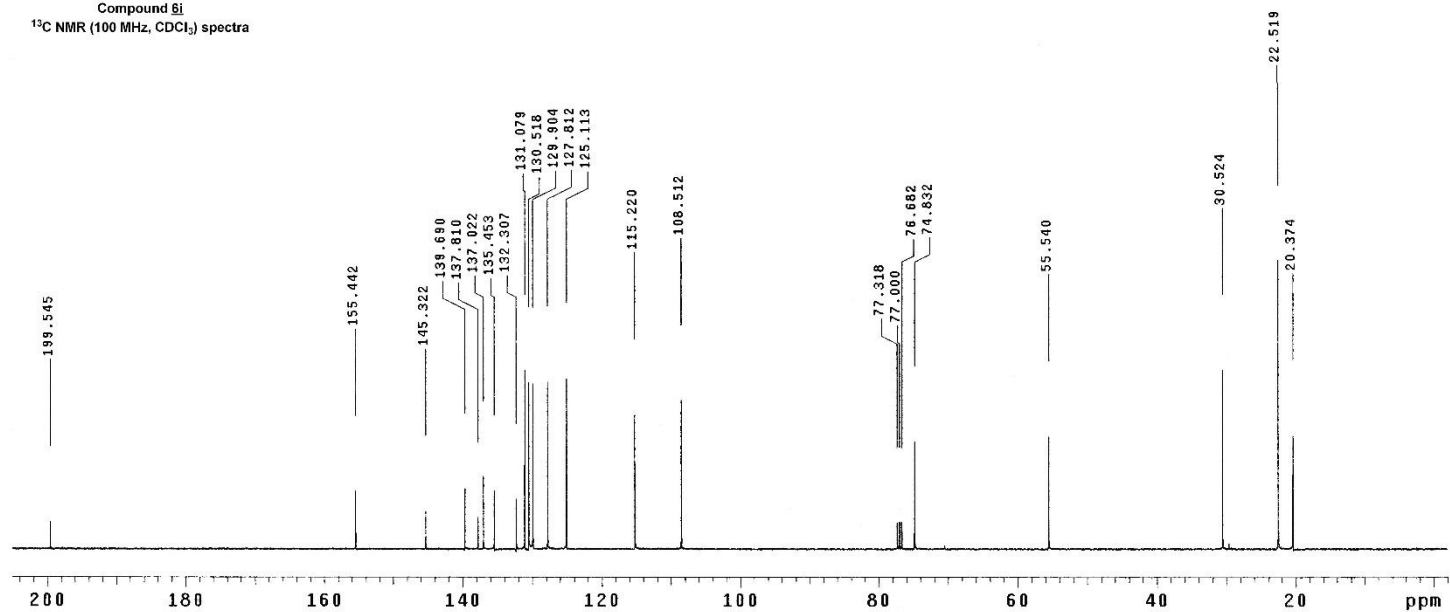

## Compound 6j

YL1041023

Pulse Sequence: s2pul  
UNITYplus-400 "unity400"  
Date: Nov 2 2015  
Solvent: CDCl<sub>3</sub>  
Ambient temperature  
Total 64 repetitions

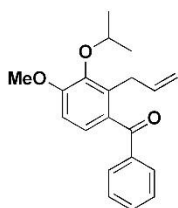

Compound 6j  
<sup>1</sup>H NMR (400 MHz, CDCl<sub>3</sub>) spectra

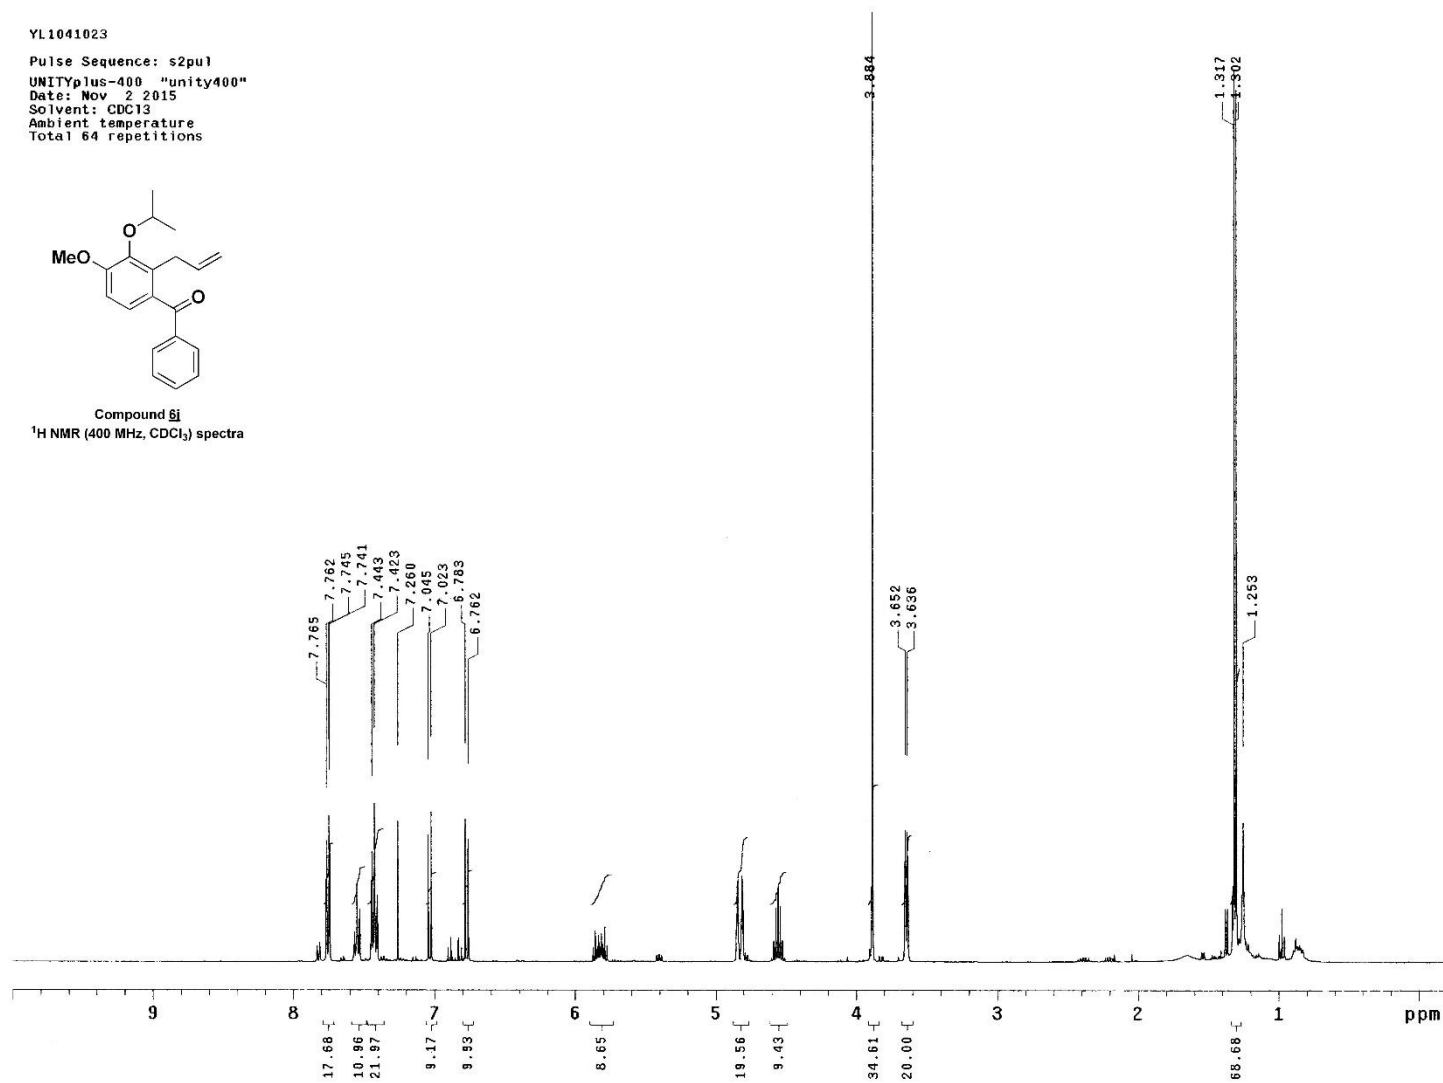

## Compound 6j

YL1041023

Pulse Sequence: s2pul  
UNITYplus-400 "unity400"  
Date: Nov 2 2015  
Solvent: CDCl<sub>3</sub>  
Ambient temperature  
Total 64 repetitions

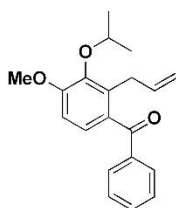

Compound **6j**  
<sup>1</sup>H NMR (400 MHz, CDCl<sub>3</sub>) spectra

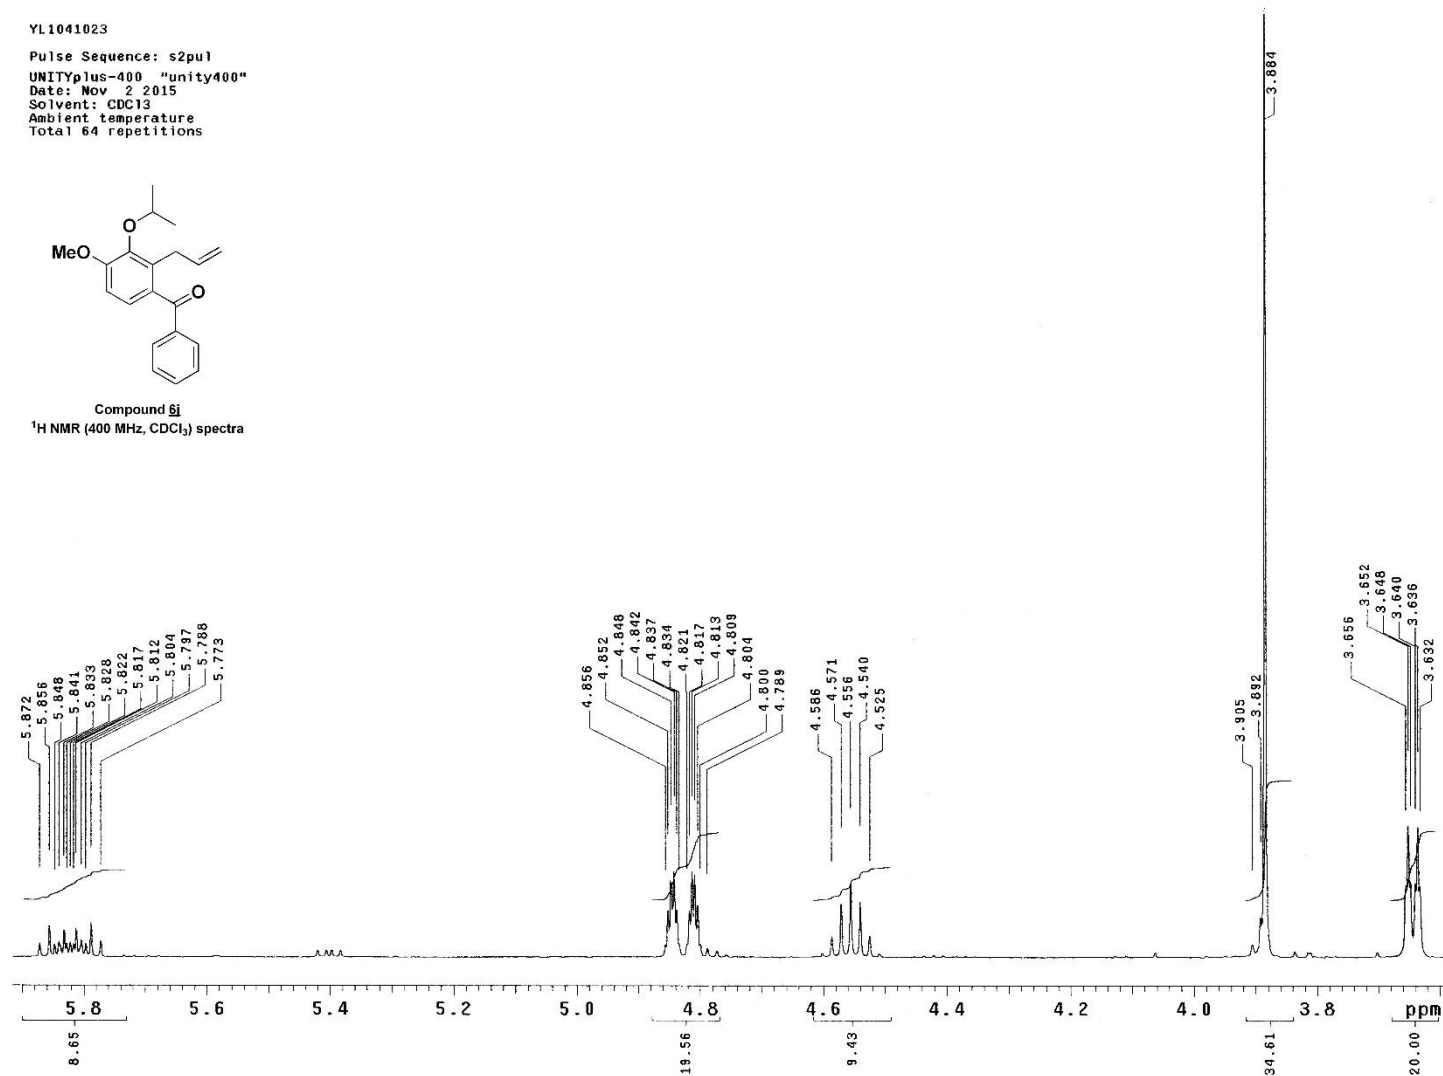

## Compound 6j

YL1041023

Pulse Sequence: s2pul  
UNITYplus-400 "unity400"  
Date: Nov 2 2015  
Solvent: CDCl<sub>3</sub>  
Ambient temperature  
Total 64 repetitions



Compound 6j  
<sup>1</sup>H NMR (400 MHz, CDCl<sub>3</sub>) spectra

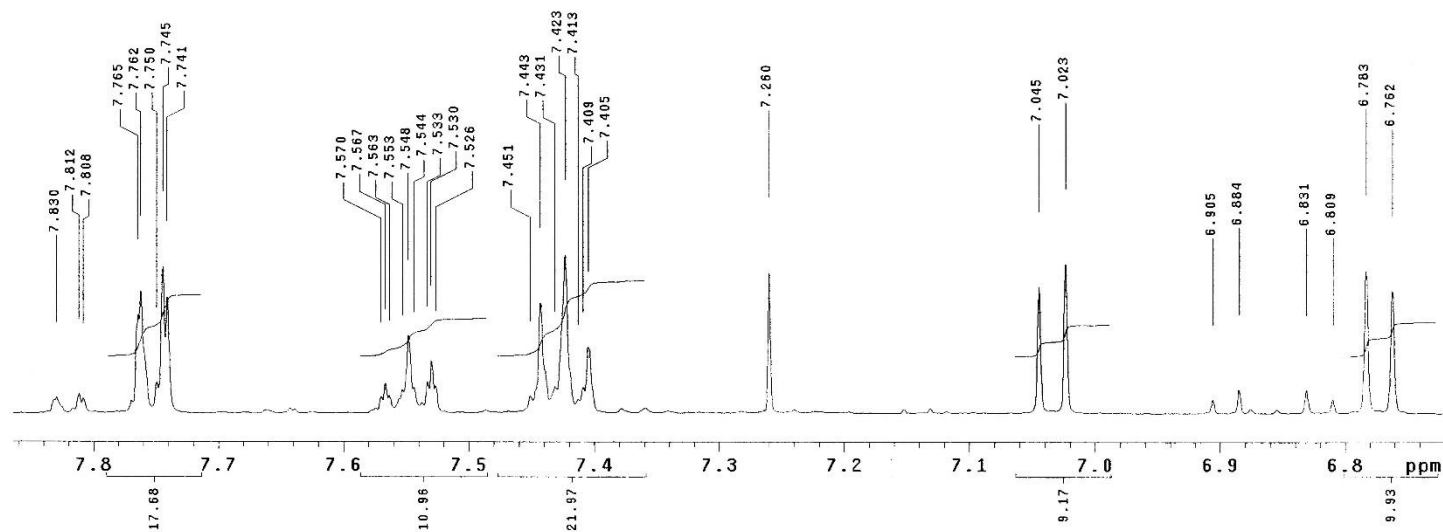

## Compound 6j

YL1041023

Pulse Sequence: s2pu1

UNITYplus-400 "unity400"

Date: Nov 2 2015

Solvent: CDCl<sub>3</sub>

Ambient temperature

Total 1312 repetitions

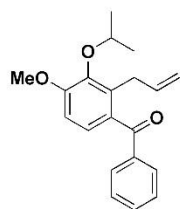

Compound 6j

<sup>13</sup>C NMR (100 MHz, CDCl<sub>3</sub>) spectra

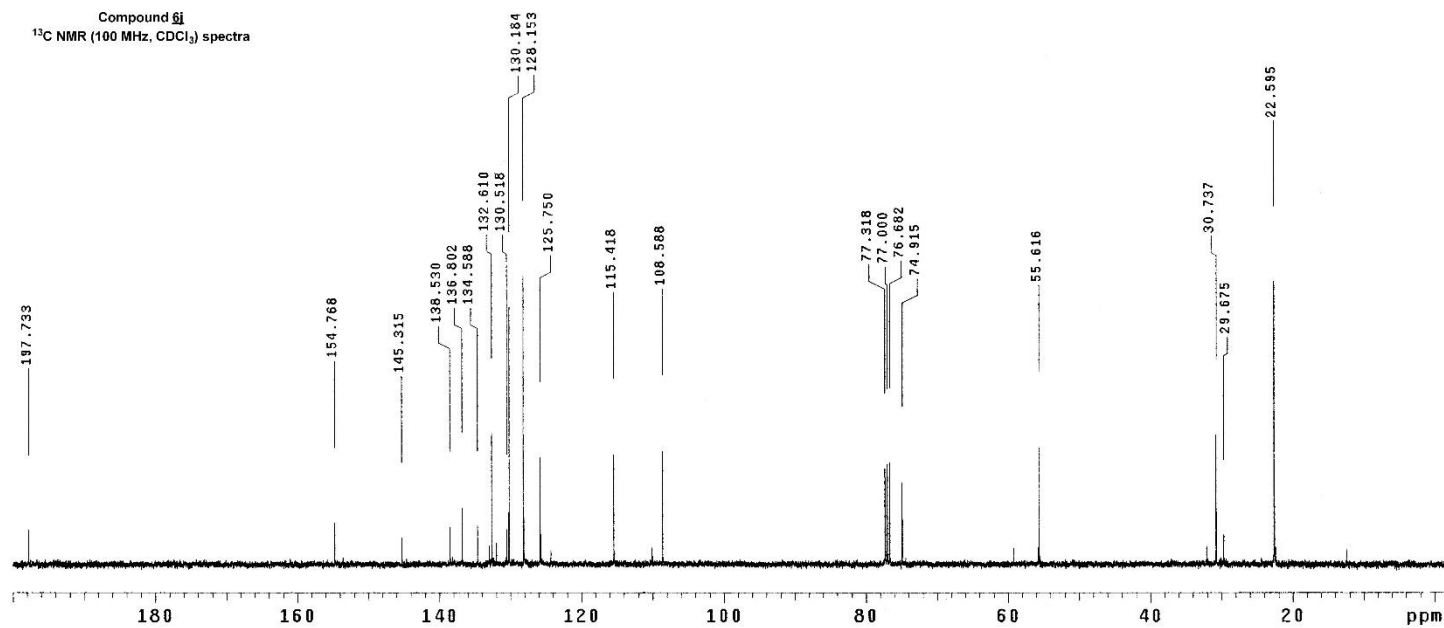

## Compound 6j

YL1041023

Pulse Sequence: s2pu1  
UNITYplus-400 "unity400"  
Date: Nov 2 2015  
Solvent: CDCl<sub>3</sub>  
Ambient temperature  
Total 1312 repetitions



Compound 6j

<sup>13</sup>C NMR (100 MHz, CDCl<sub>3</sub>) spectra

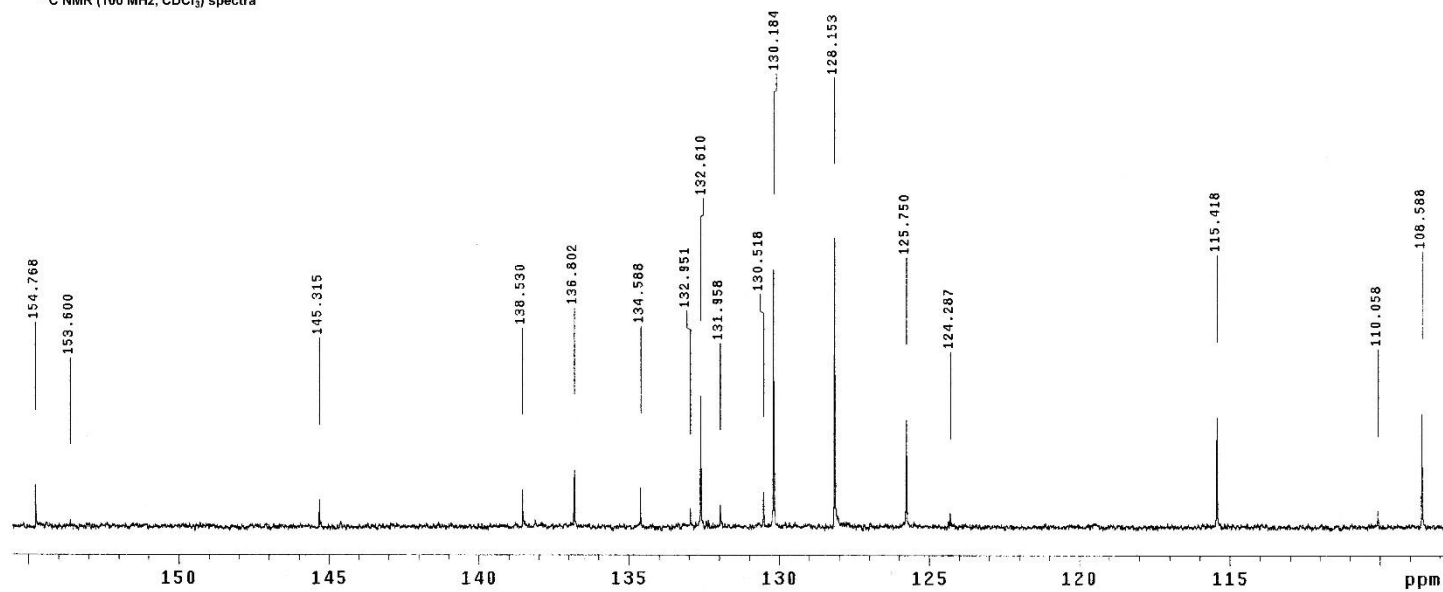

## Compound 6k

YLenon2K

Pulse Sequence: s2pu1

UNITYplus-400 "unity400"

Date: Oct 26 2015

Solvent: CDCl<sub>3</sub>

Ambient temperature

Total 64 repetitions

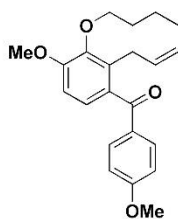

Compound 6k

<sup>1</sup>H NMR (400 MHz, CDCl<sub>3</sub>) spectra

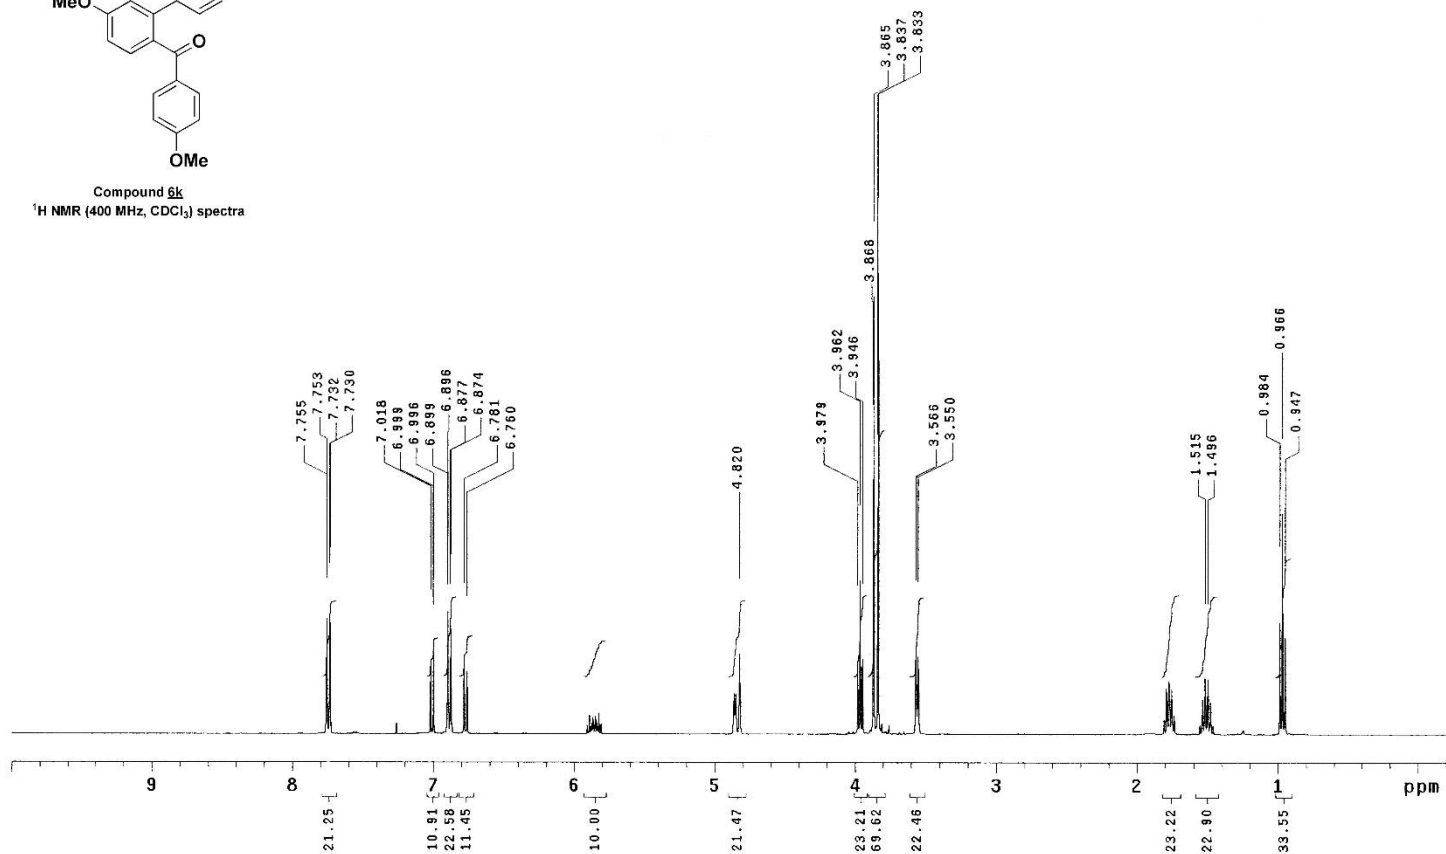

## Compound 6k

YLenon2K

Pulse Sequence: s2pu1

UNITYplus-400 "unity400"

Date: Oct 26 2015

Solvent: CDCl<sub>3</sub>

Ambient temperature

Total 64 repetitions

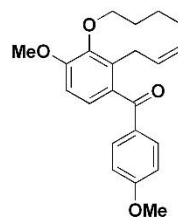

Compound 6k

<sup>1</sup>H NMR (400 MHz, CDCl<sub>3</sub>) spectra

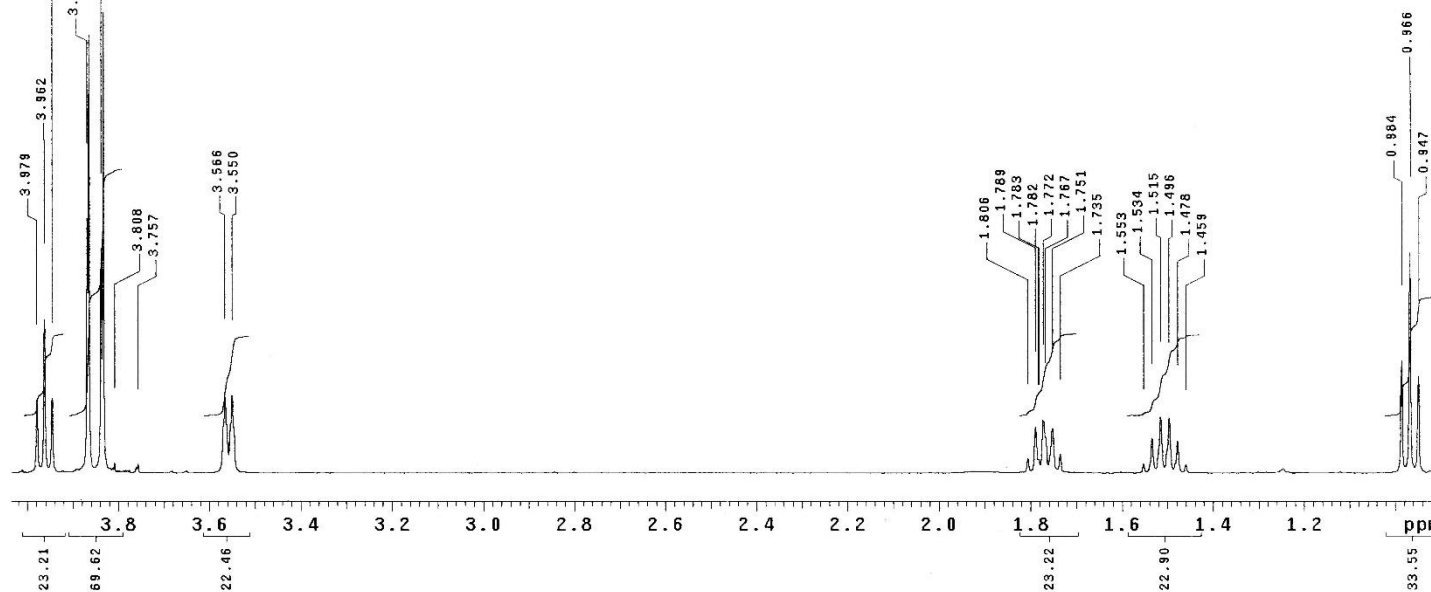



## Compound 6k

YLenon2K

Pulse Sequence: s2pu1

UNITYplus-400 "unity400"

Date: Oct 26 2015

Solvent: CDCl<sub>3</sub>

Ambient temperature

Total 64 repetitions

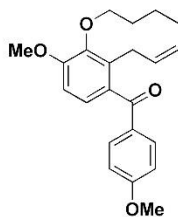

Compound 6k

<sup>1</sup>H NMR (400 MHz, CDCl<sub>3</sub>) spectra

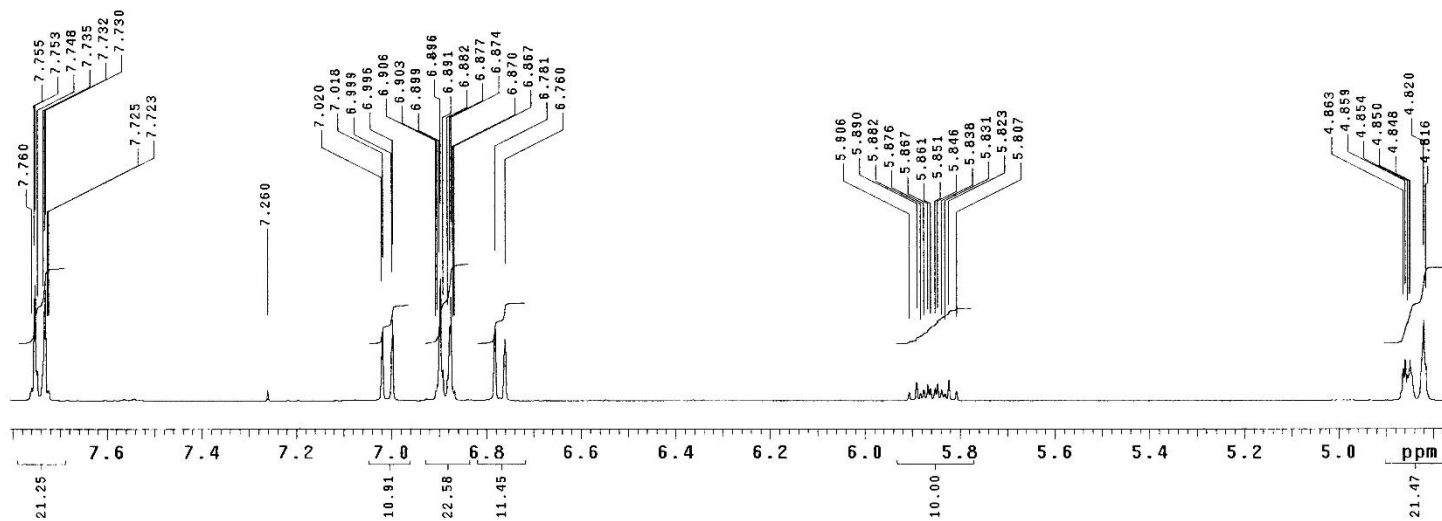

## Compound 6k

YLenon2K

Pulse Sequence: s2pul  
UNITYplus-400 "unity400"  
Date: Oct 26 2015  
Solvent: CDCl<sub>3</sub>  
Ambient temperature  
Total 208 repetitions

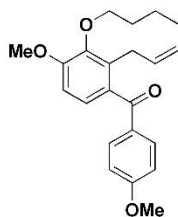

Compound 6k

<sup>13</sup>C NMR (100 MHz, CDCl<sub>3</sub>) spectra

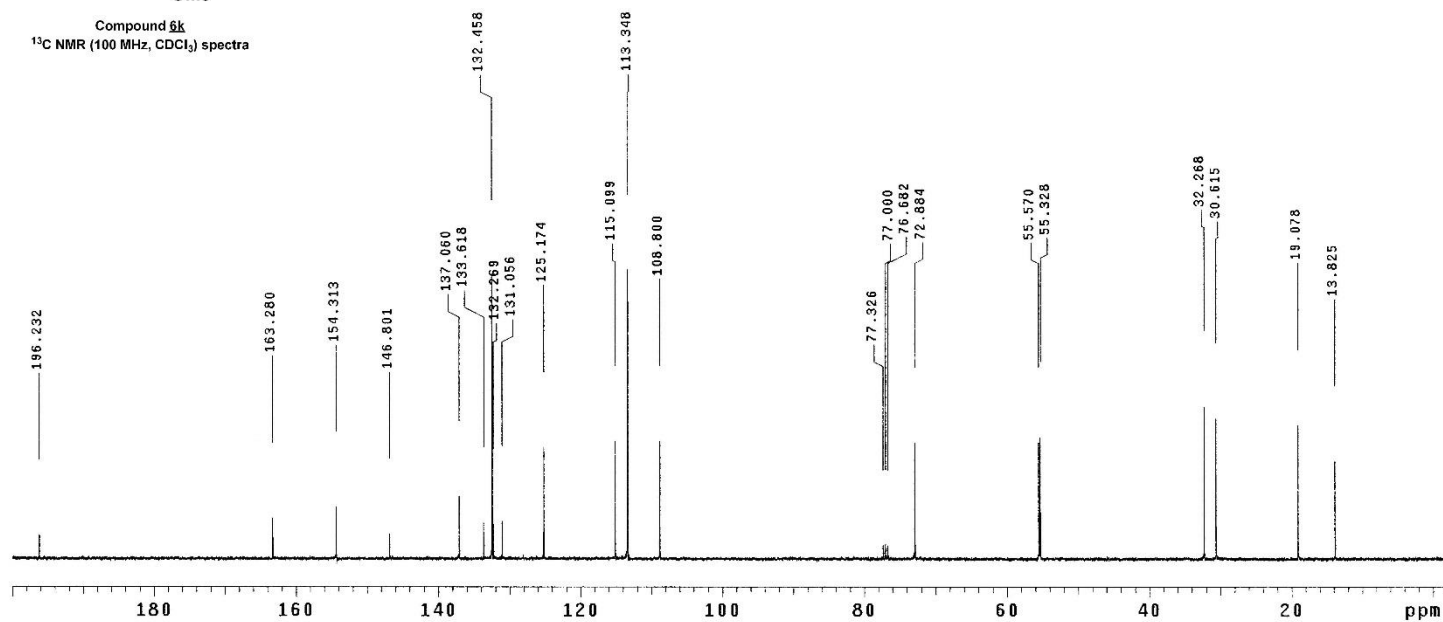

## Compound 6l

YLenon21

Pulse Sequence: s2pul  
UNITYplus-400 "unity400"  
Date: Nov 2 2015  
Solvent: CDCl<sub>3</sub>  
Ambient temperature  
Total 64 repetitions

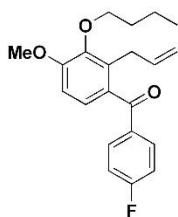

Compound 6l

<sup>1</sup>H NMR (400 MHz, CDCl<sub>3</sub>) spectra

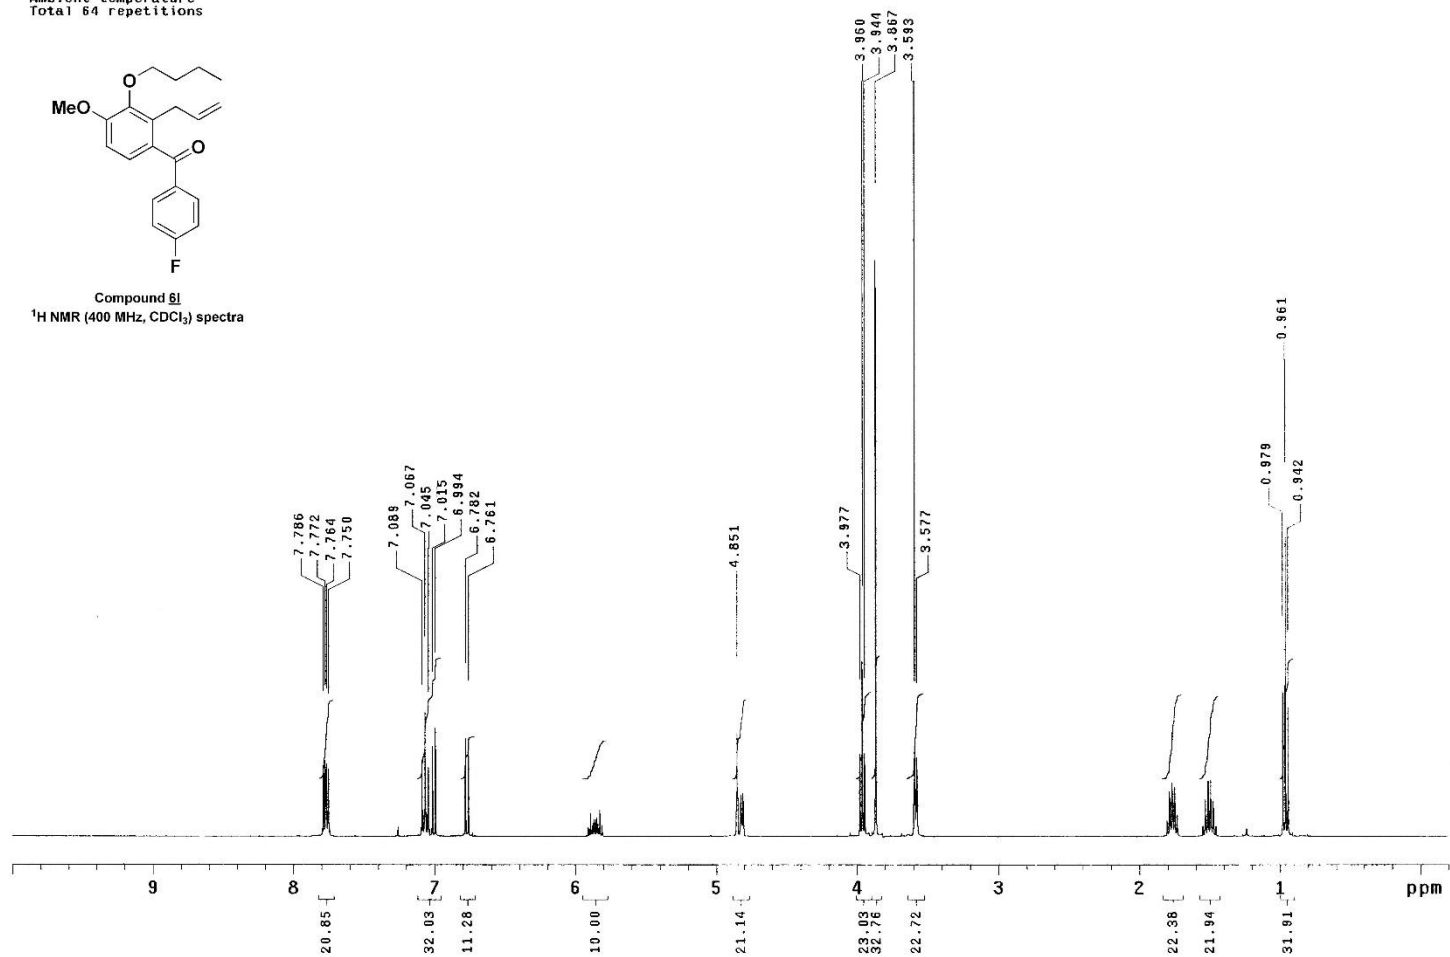

## Compound 6l

YLenon21

Pulse Sequence: s2pul

UNITYplus-400 "unity400"

Date: Nov 2 2015

Solvent: CDCl<sub>3</sub>

Ambient temperature

Total 64 repetitions

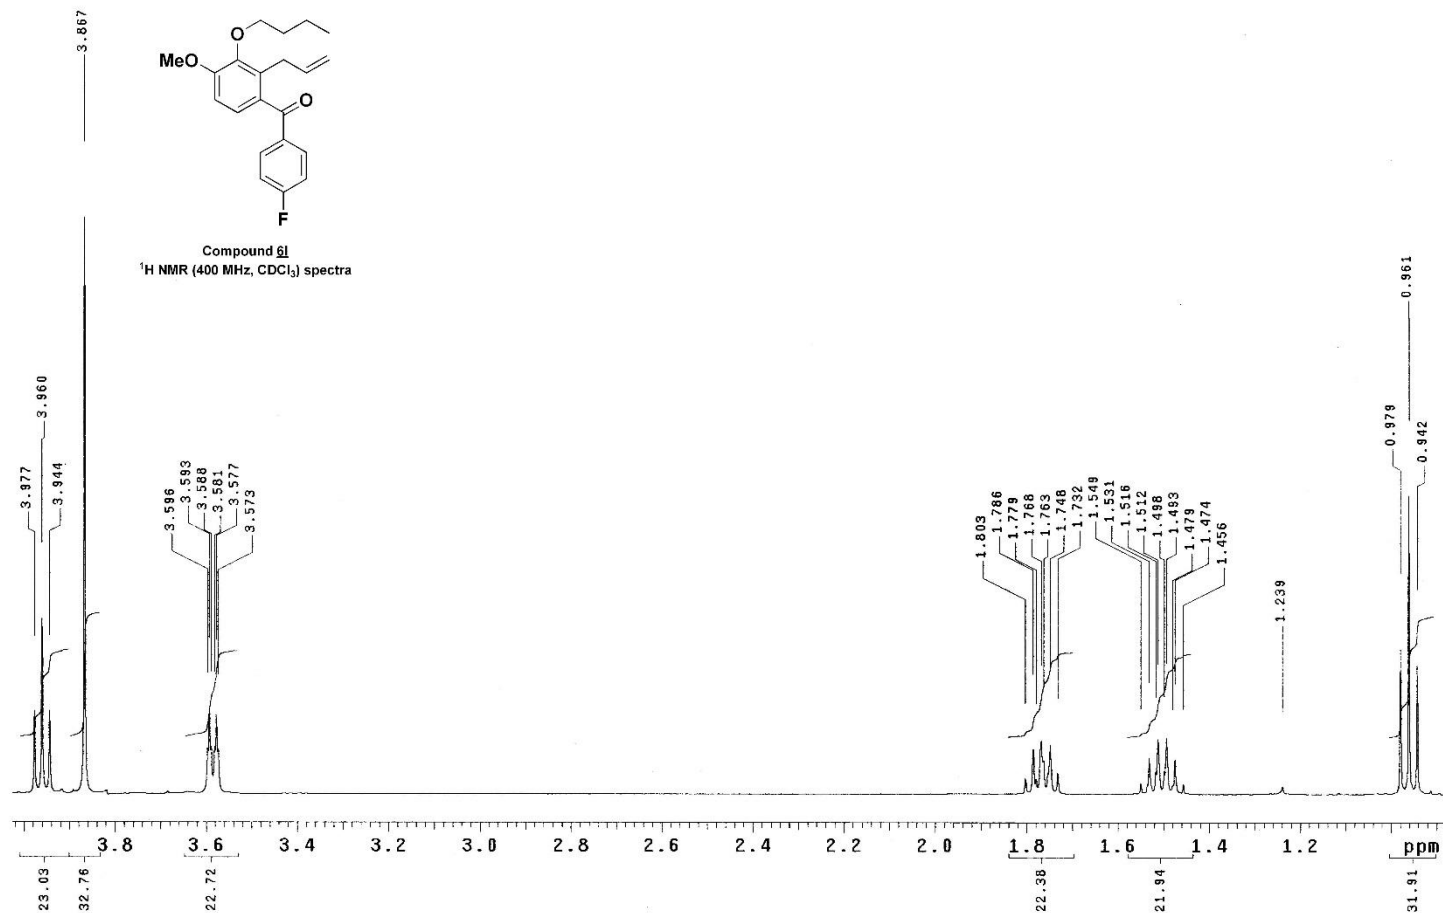

# Compound 6l

YLenon21

Pulse Sequence: s2pul  
 UNITYplus-400 "unity400"  
 Date: Nov 2 2015  
 Solvent: CDCl<sub>3</sub>  
 Ambient temperature  
 Total 64 repetitions

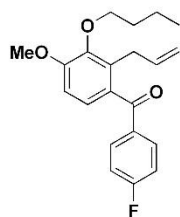

Compound 6l

<sup>1</sup>H NMR (400 MHz, CDCl<sub>3</sub>) spectra

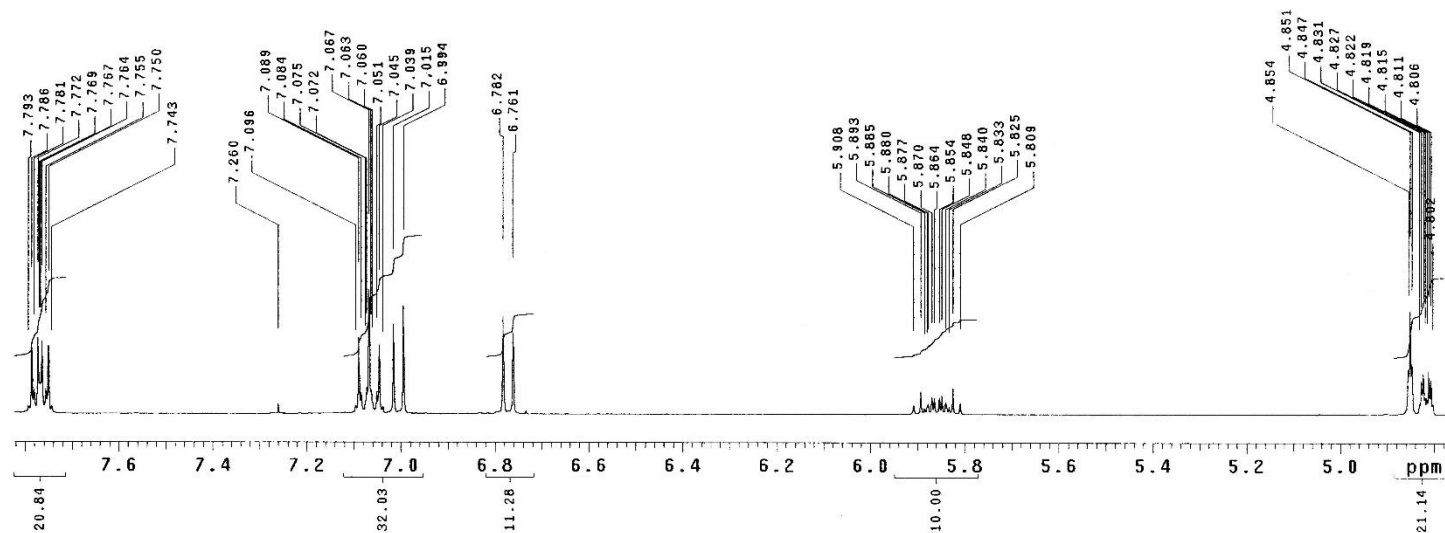

## Compound 6l

YLenon21

Pulse Sequence: s2pul  
UNITYplus-400 "unity400"  
Date: Nov 2 2015  
Solvent: CDCl<sub>3</sub>  
Ambient temperature  
Total 2464 repetitions

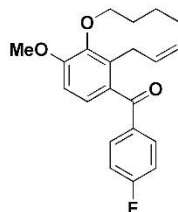

Compound 6l

<sup>13</sup>C NMR (100 MHz, CDCl<sub>3</sub>) spectra

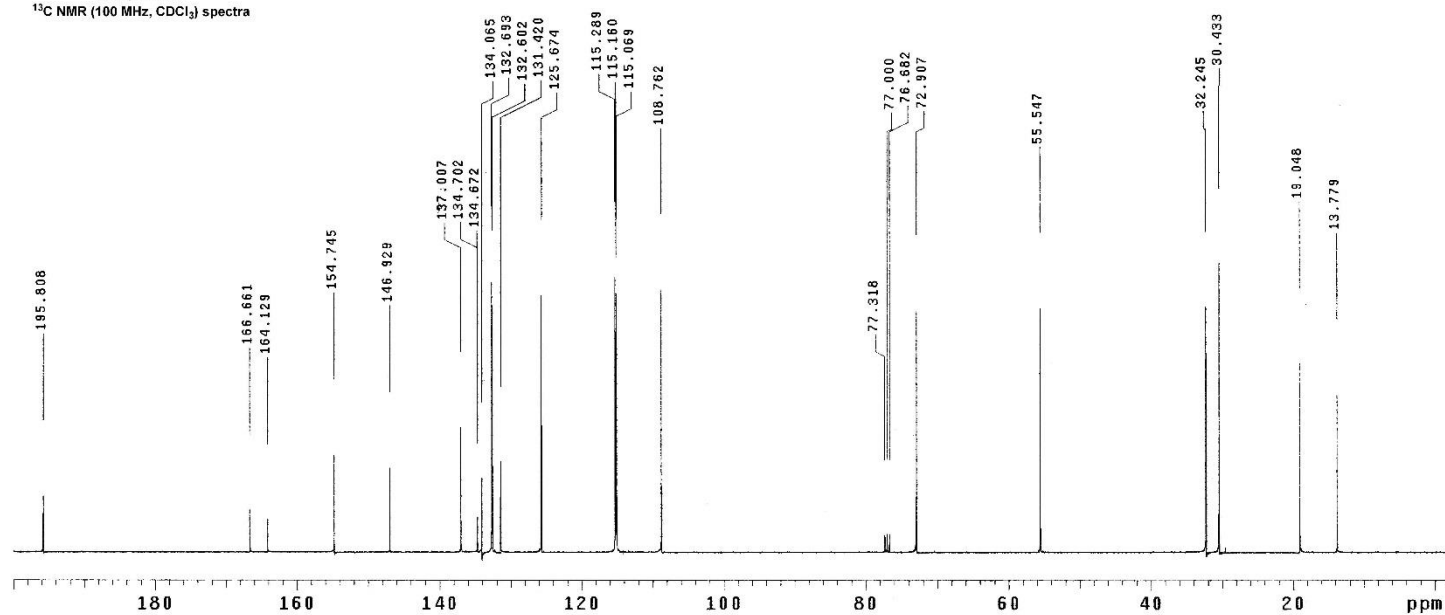

## Compound 6l

YLenon21

Pulse Sequence: s2pul  
UNITYplus-400 "unity400"  
Date: Nov 2 2015  
Solvent: CDCl<sub>3</sub>  
Ambient temperature  
Total 2464 repetitions



Compound 6l

<sup>13</sup>C NMR (100 MHz, CDCl<sub>3</sub>) spectra

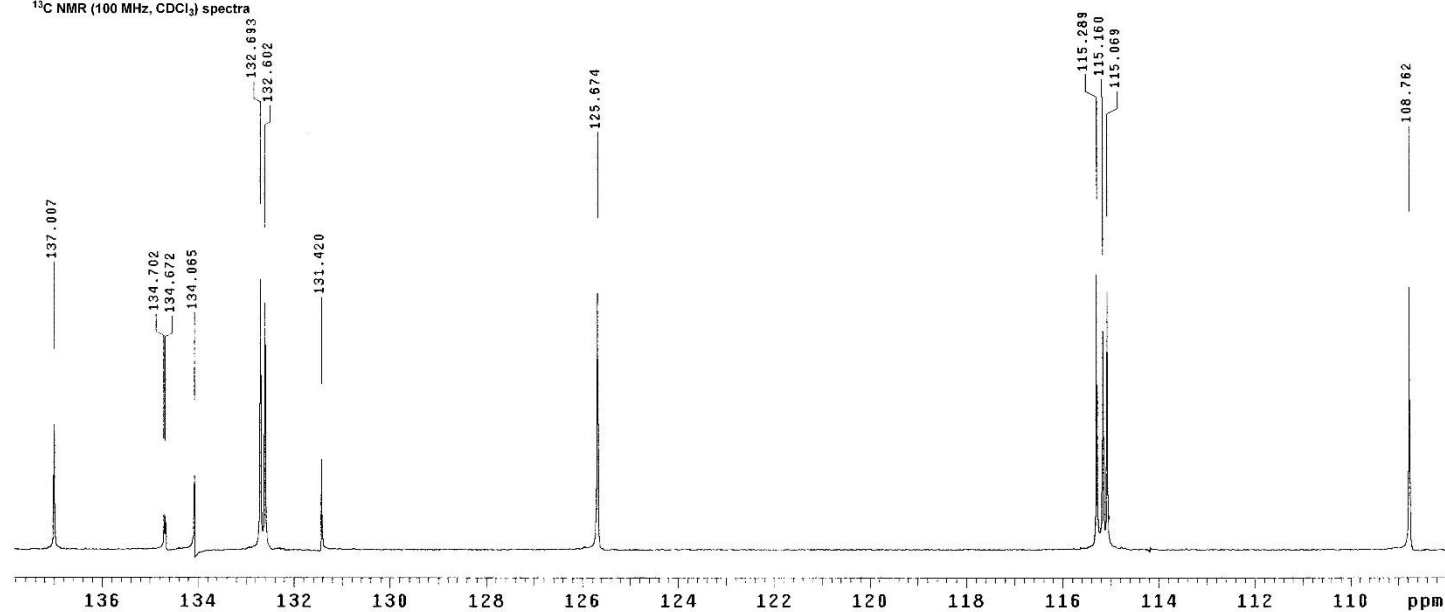

## Compound 6m

YL1041224

Pulse Sequence: s2pu1

UNITYplus-400 "unity400"

Date: Dec 25 2015

Solvent: CDCl<sub>3</sub>

Ambient temperature

Total 64 repetitions

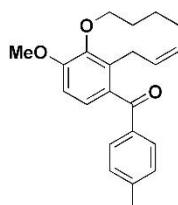

Compound 6m  
<sup>1</sup>H NMR (400 MHz, CDCl<sub>3</sub>) spectra

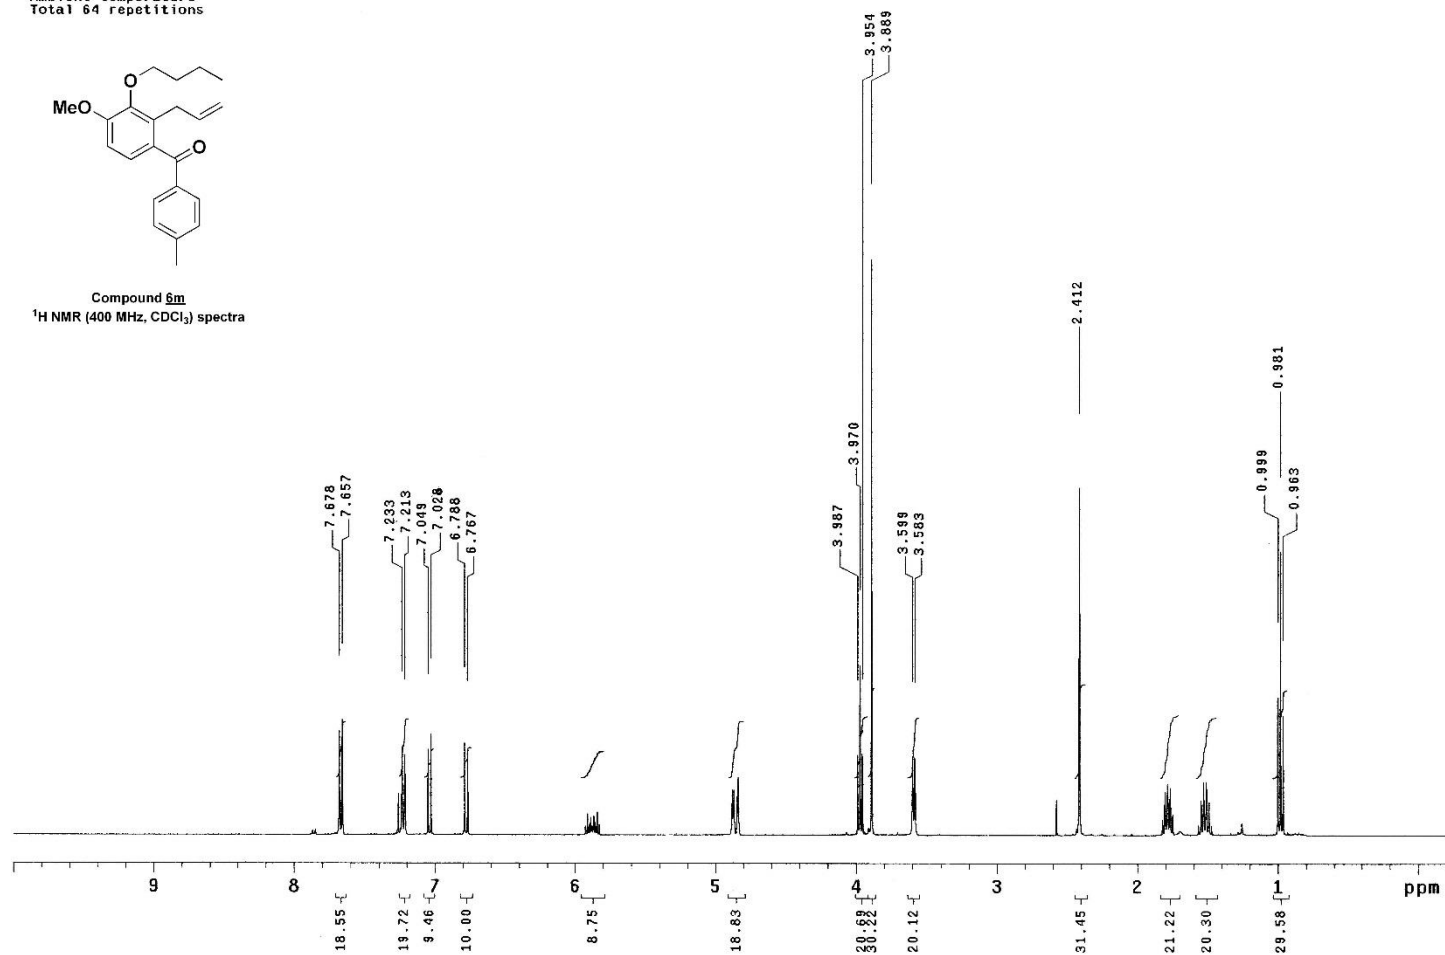



## Compound 6m

YL1041224

Pulse Sequence: s2pu1

UNITYplus-400 "unity400"

Date: Dec 25 2015

Solvent: CDCl<sub>3</sub>

Ambient temperature

Total 64 repetitions

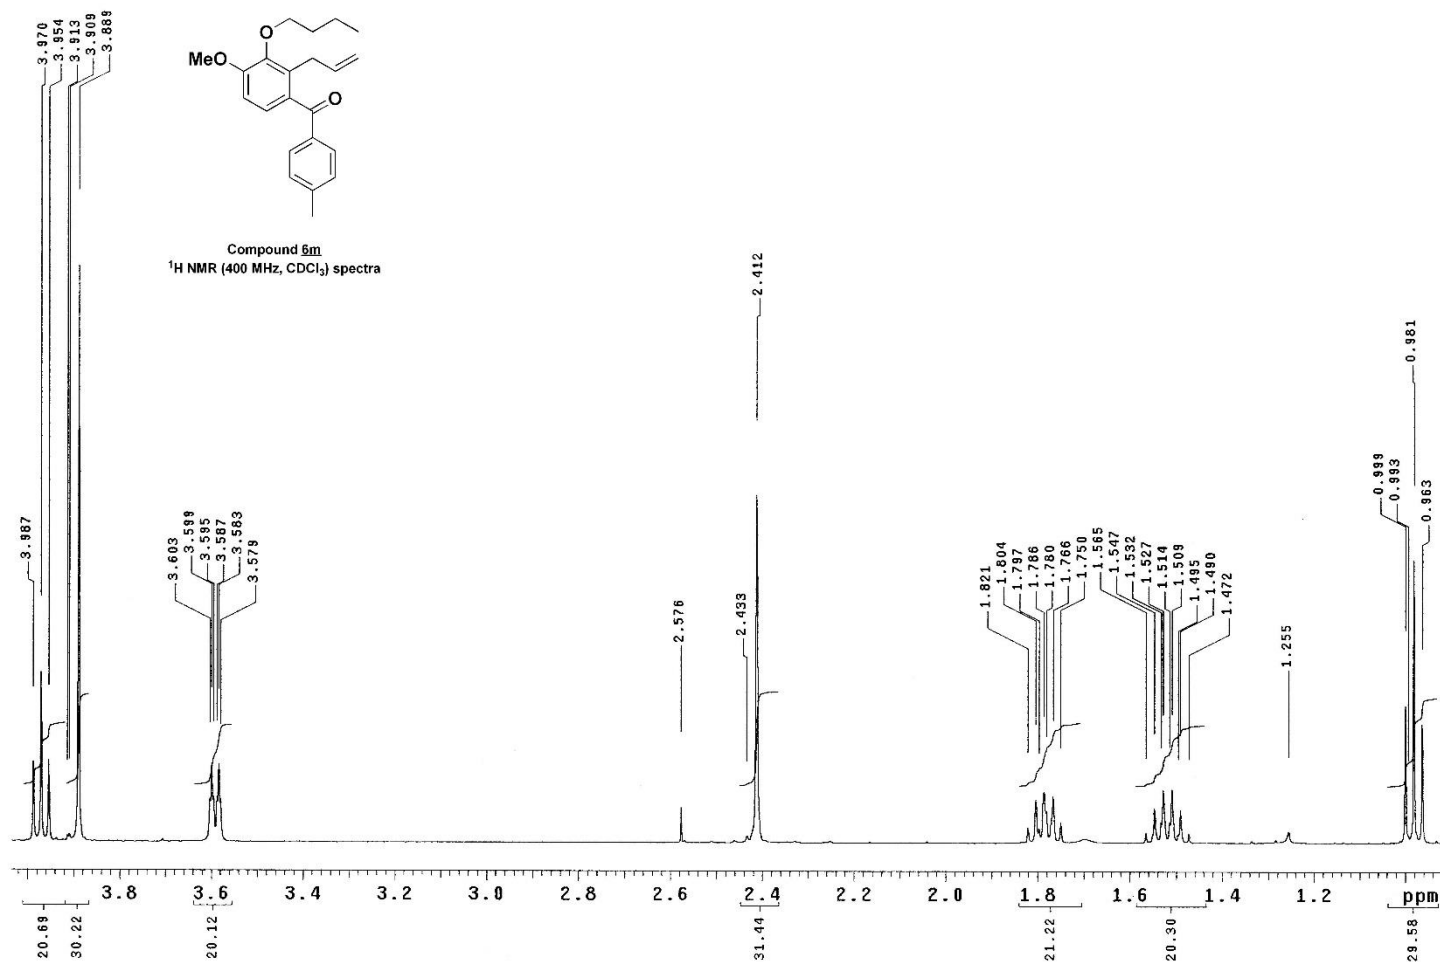

## Compound 6m

YL1041224

Pulse Sequence: s2pu1  
UNITYplus-400 "unity400"  
Date: Dec 25 2015  
Solvent: CDCl<sub>3</sub>  
Ambient temperature  
Total 64 repetitions



Compound 6m  
<sup>1</sup>H NMR (400 MHz, CDCl<sub>3</sub>) spectra

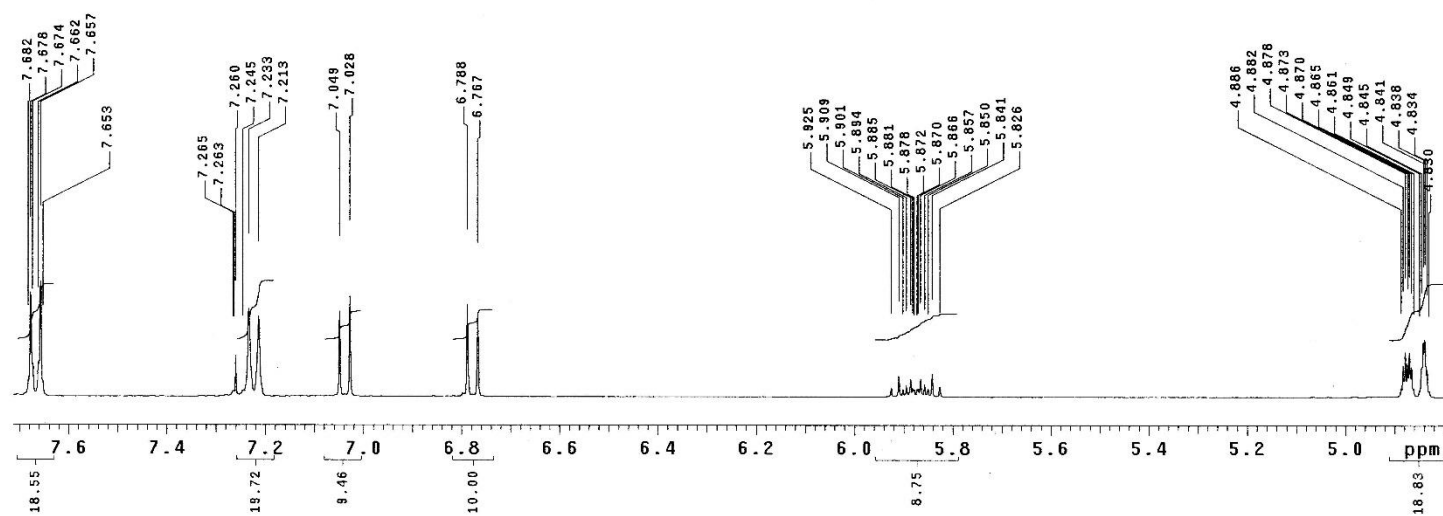

## Compound 6m

YL1041224

Pulse Sequence: s2pu1

UNITYplus-400 "unity400"

Date: Dec 25 2015

Solvent: CDCl<sub>3</sub>

Ambient Temperature

Total 1024 repetitions

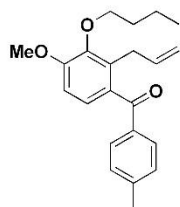

Compound 6m

<sup>13</sup>C NMR (100 MHz, CDCl<sub>3</sub>) spectra

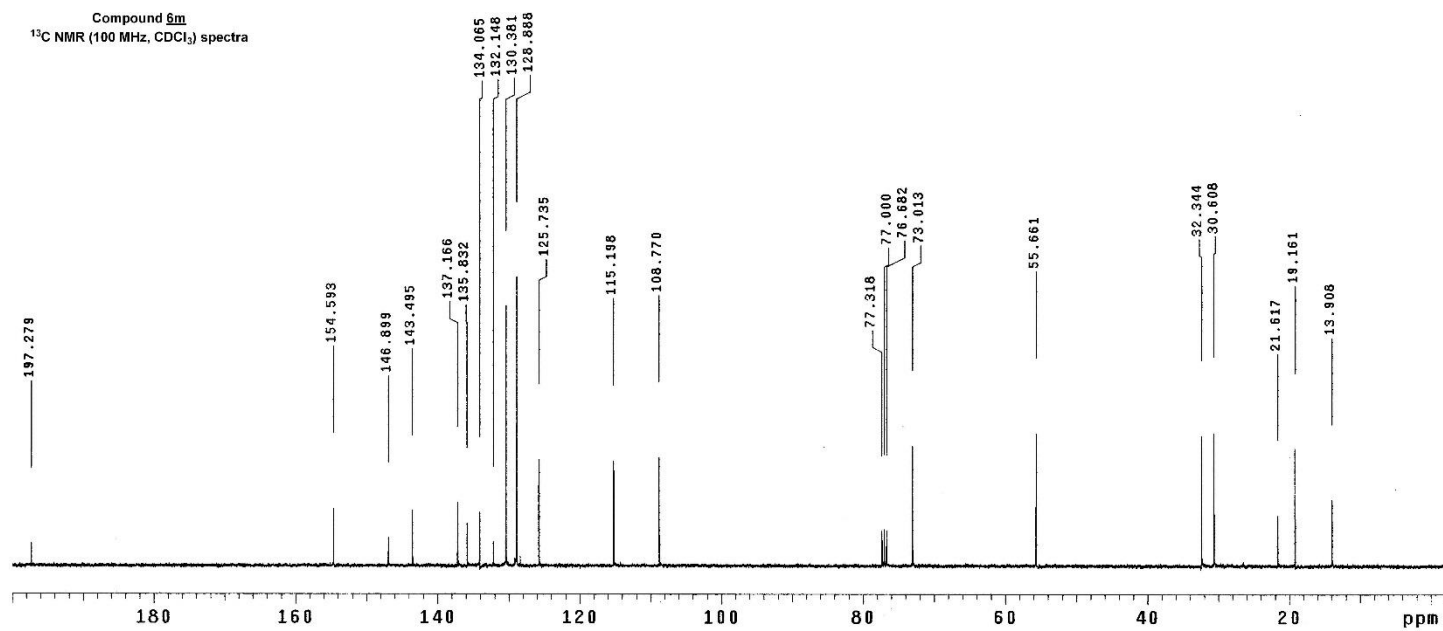

## Compound 6n

YLenon2n

Pulse Sequence: s2pul  
UNITYplus-400 "unity400"  
Date: Nov 4 2015  
Solvent: CDCl<sub>3</sub>  
Ambient temperature  
Total 64 repetitions

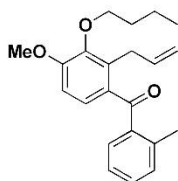

Compound 6n  
<sup>1</sup>H NMR (400 MHz, CDCl<sub>3</sub>) spectra

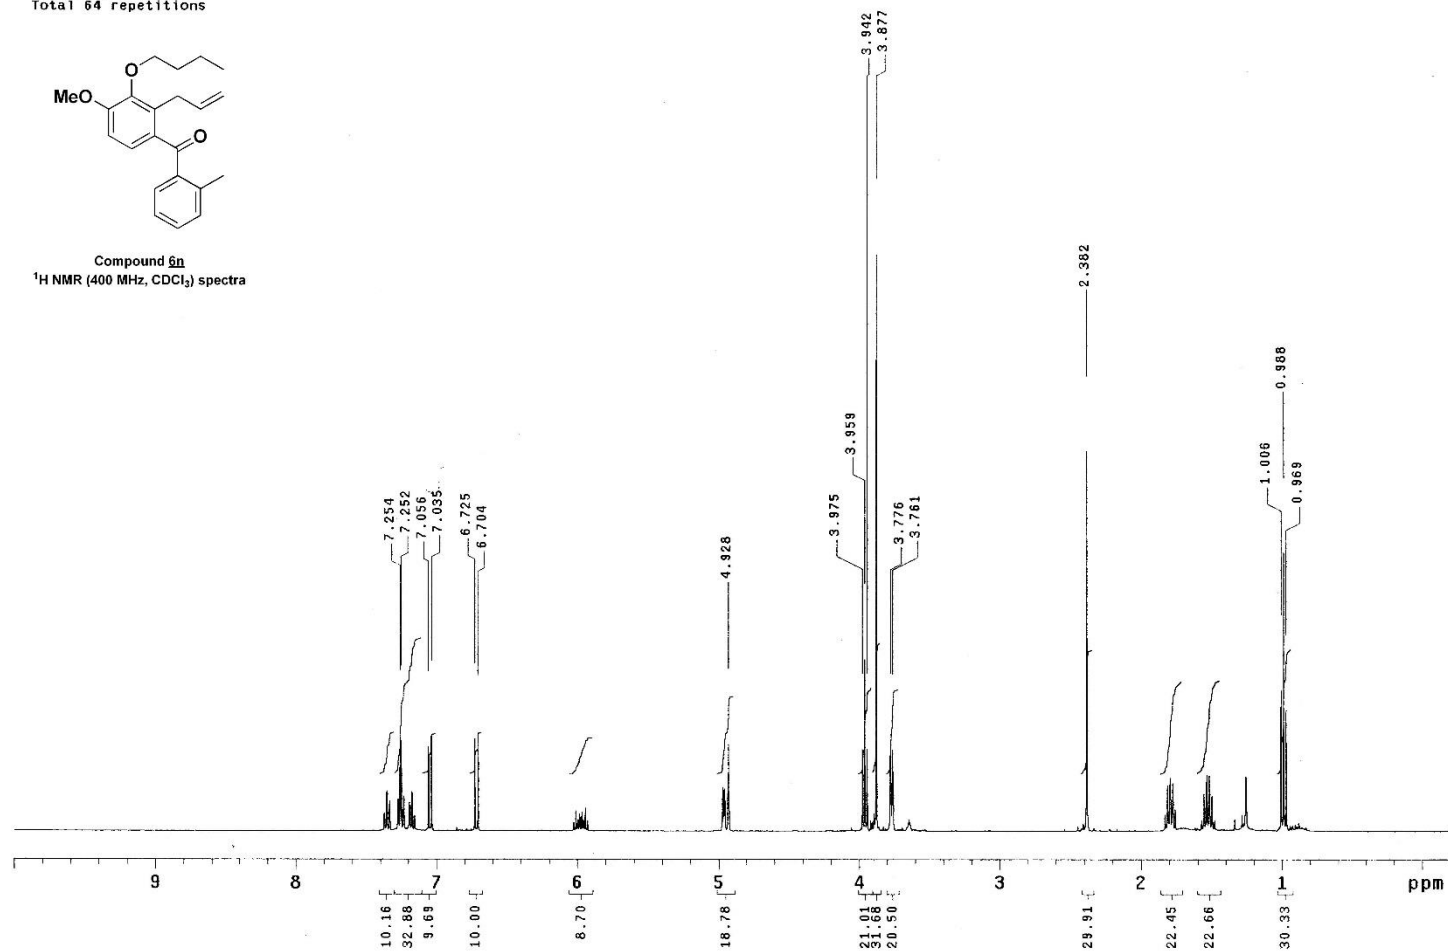

# Compound 6n

YLenon2n

Pulse Sequence: s2pu1  
 UNITYplus-400 "unity400"  
 Date: Nov 4 2015  
 Solvent: CDCl3  
 Ambient temperature  
 Total 64 repetitions

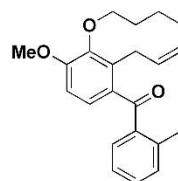

Compound 6n  
<sup>1</sup>H NMR (400 MHz, CDCl<sub>3</sub>) spectra

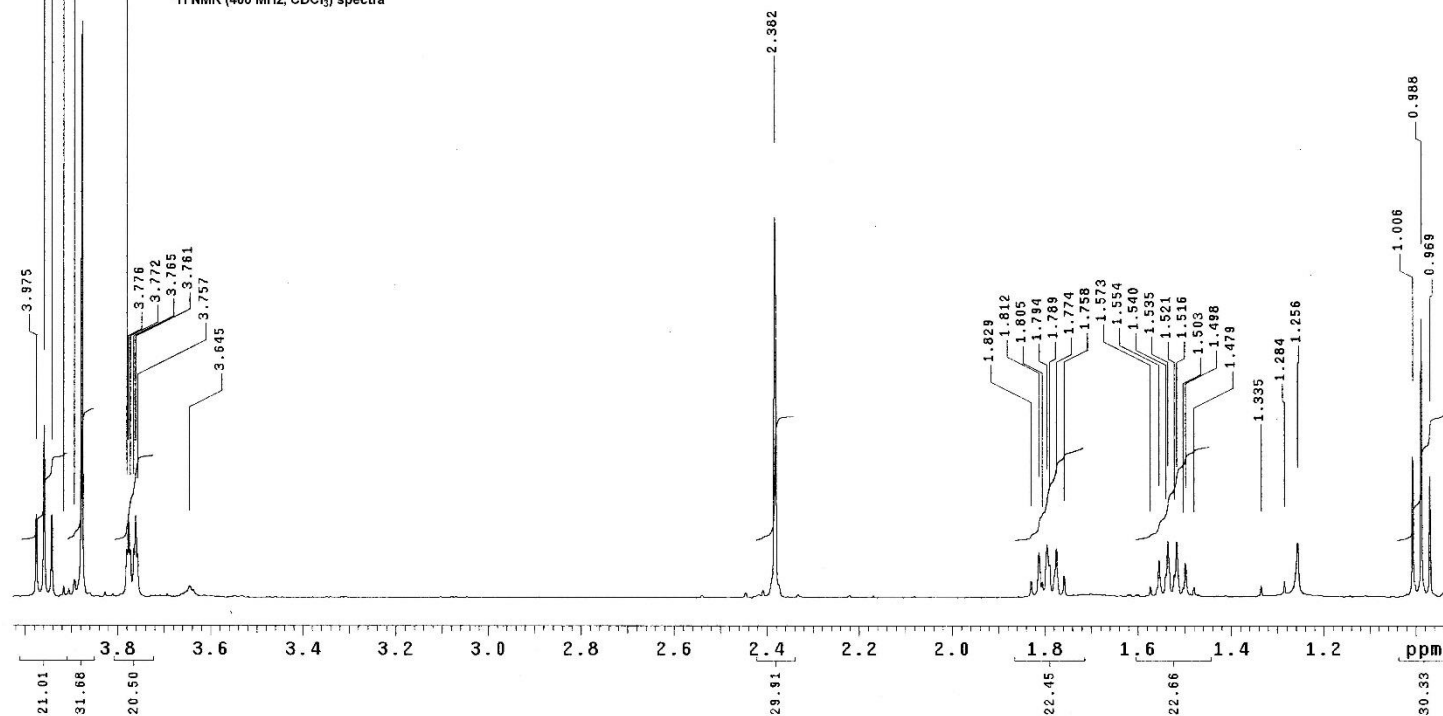

## Compound 6n

YLenon2n

Pulse Sequence: s2pul  
UNITYplus-400 "unity400"  
Date: Nov 4 2015  
Solvent: CDCl<sub>3</sub>  
Ambient temperature  
Total 64 repetitions

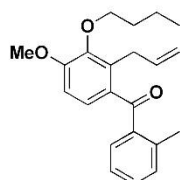

Compound **6n**  
<sup>1</sup>H NMR (400 MHz, CDCl<sub>3</sub>) spectra

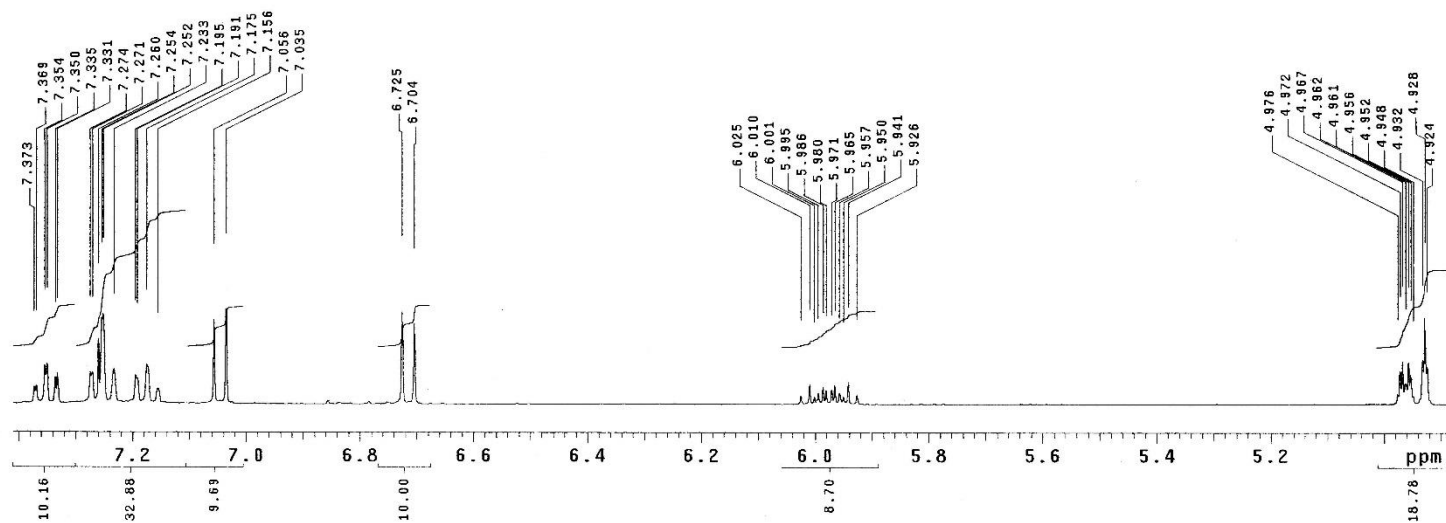

## Compound 6n

YLenon2n

Pulse Sequence: s2pul  
UNITYplus-400 "unity400"  
Date: Nov 4 2015  
Solvent: CDCl<sub>3</sub>  
Ambient temperature  
Total 2144 repetitions

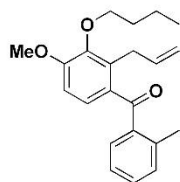

Compound 6n

<sup>13</sup>C NMR (100 MHz, CDCl<sub>3</sub>) spectra

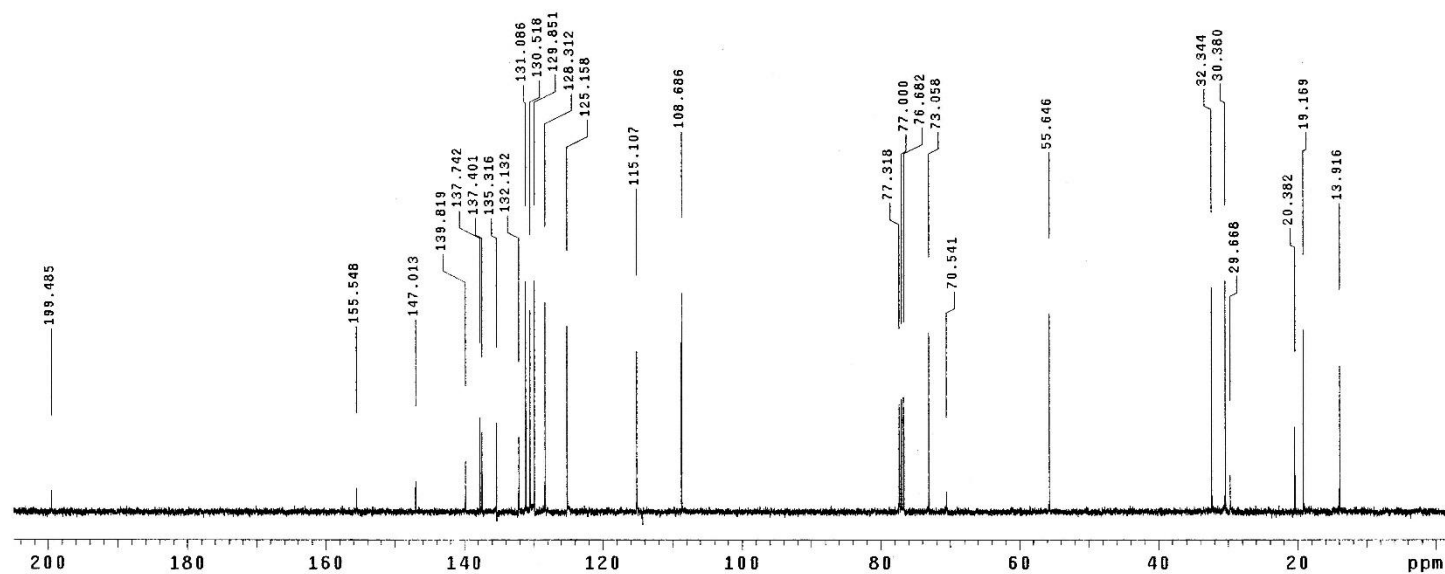

## Compound 6n

YLenon2n

Pulse Sequence: s2pul  
UNITYplus-400 "unity400"  
Date: Nov 4 2015  
Solvent: CDCl<sub>3</sub>  
Ambient temperature  
Total 2144 repetitions



Compound 6n  
<sup>13</sup>C NMR (100 MHz, CDCl<sub>3</sub>) spectra

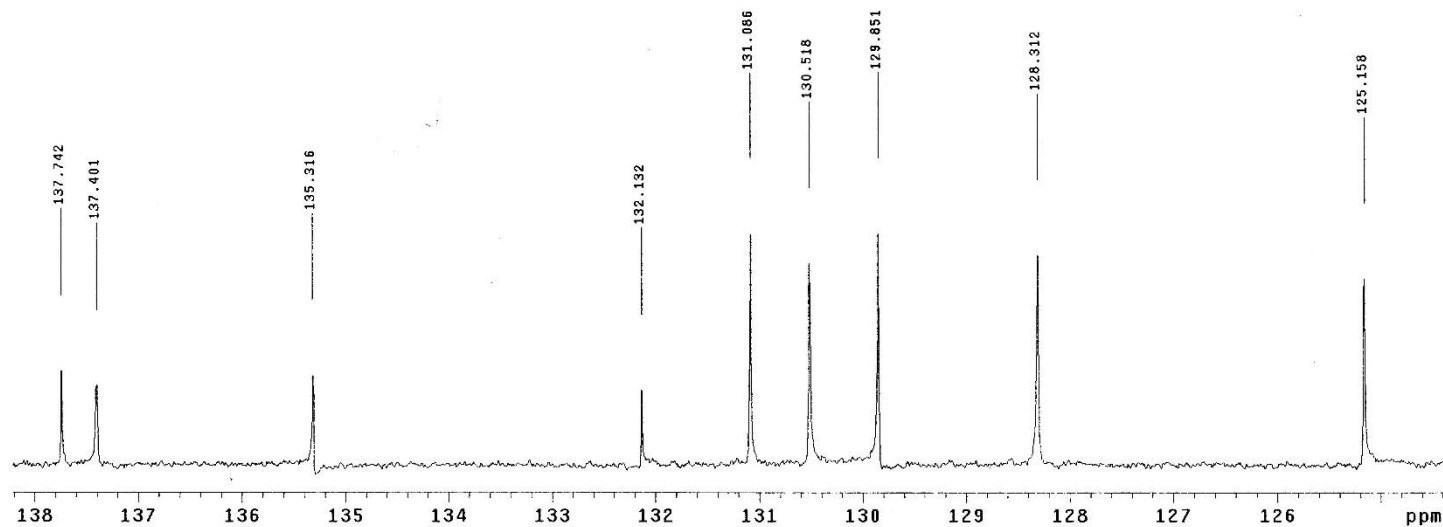



## Compound 6o

YLenon2o

Pulse Sequence: s2pu1  
UNITYplus-400 "unity400"  
Date: Nov 9 2015  
Solvent: CDCl<sub>3</sub>  
Ambient temperature  
Total 64 repetitions

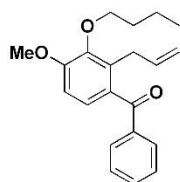

Compound 6o  
<sup>1</sup>H NMR (400 MHz, CDCl<sub>3</sub>) spectra

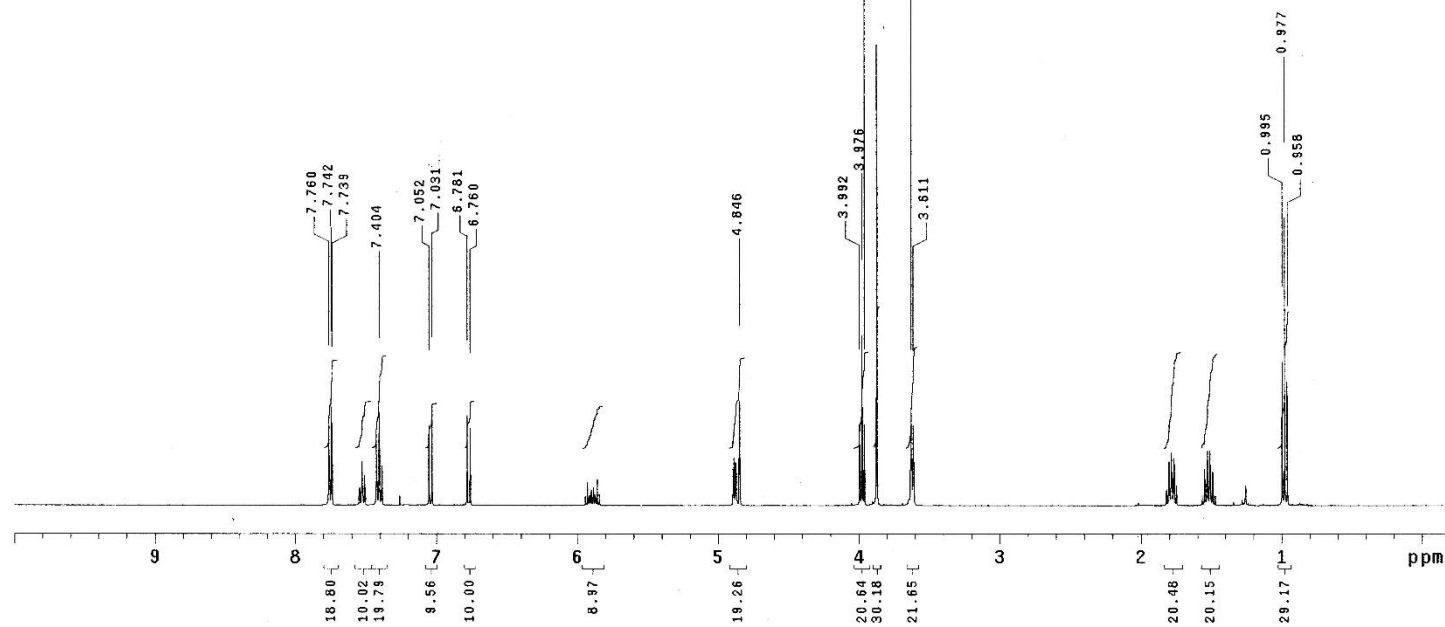

# Compound 6o

YLenon2o

Pulse Sequence: s2pu1

UNITYplus-400 "unity400"

Date: Nov 9 2015

Solvent: CDCl<sub>3</sub>

Ambient temperature

Total 64 repetitions

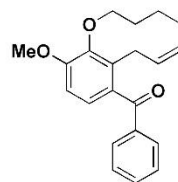

Compound 6o

<sup>1</sup>H NMR (400 MHz, CDCl<sub>3</sub>) spectra

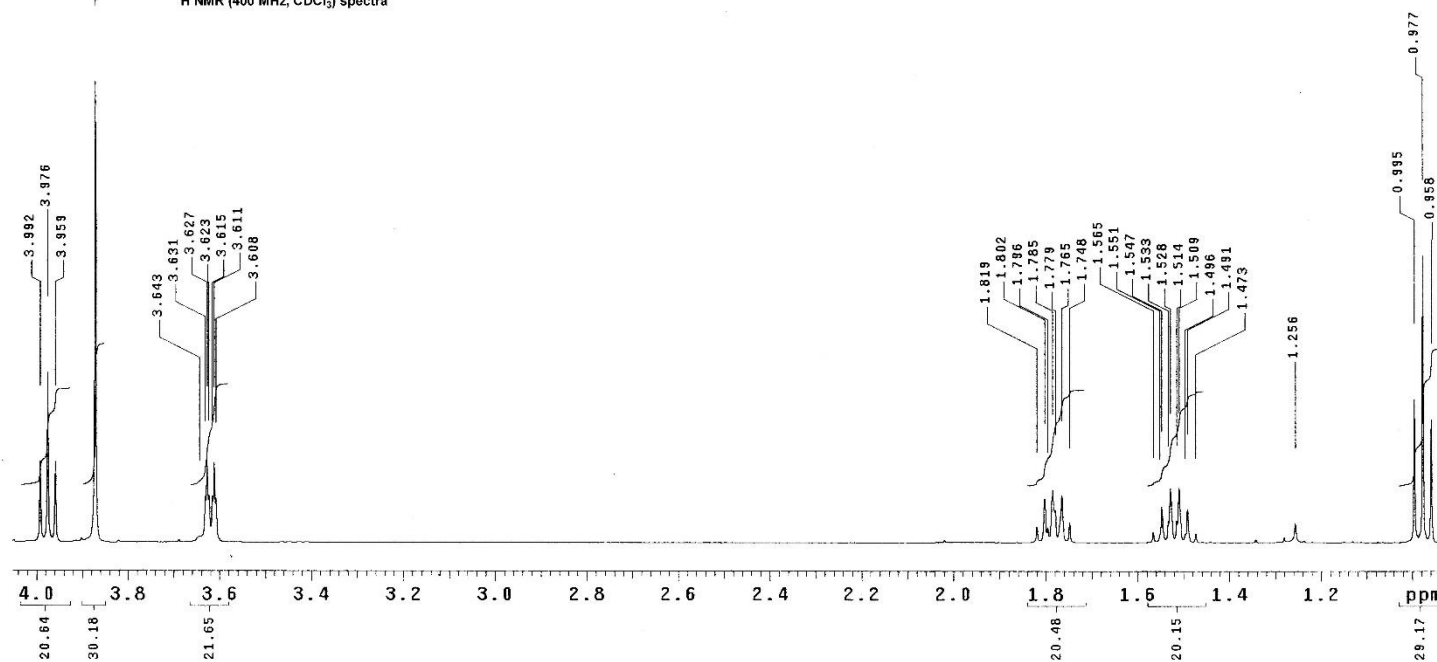

## Compound 6o

YLenon2o

Pulse Sequence: s2pu1  
UNITYplus-400 "unity400"  
Date: Nov 9 2015  
Solvent: CDCl<sub>3</sub>  
Ambient temperature  
Total 64 repetitions

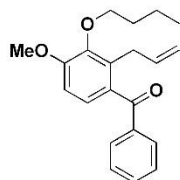

Compound 6o  
<sup>1</sup>H NMR (400 MHz, CDCl<sub>3</sub>) spectra

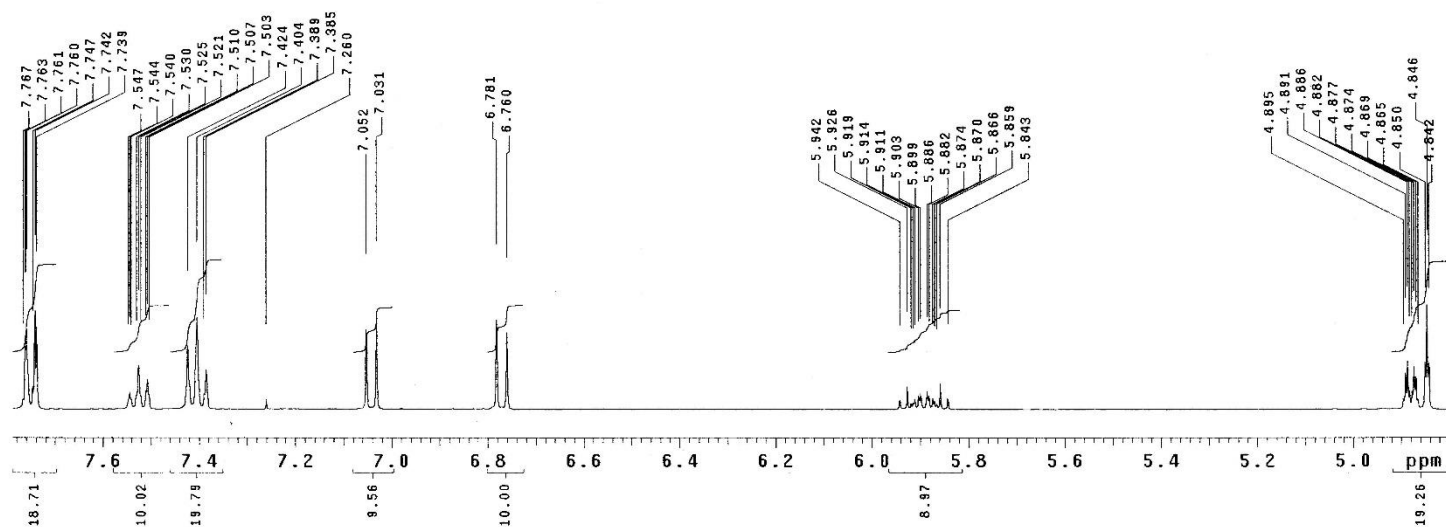

## Compound 6o

YLenon2o

Pulse Sequence: s2pu1

UNITYplus-400 "unity400"

Date: Nov 9 2015

Solvent: CDCl<sub>3</sub>

Ambient Temperature

Total 128 repetitions

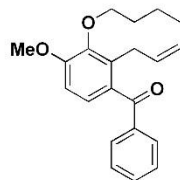

Compound 6o

<sup>13</sup>C NMR (100 MHz, CDCl<sub>3</sub>) spectra

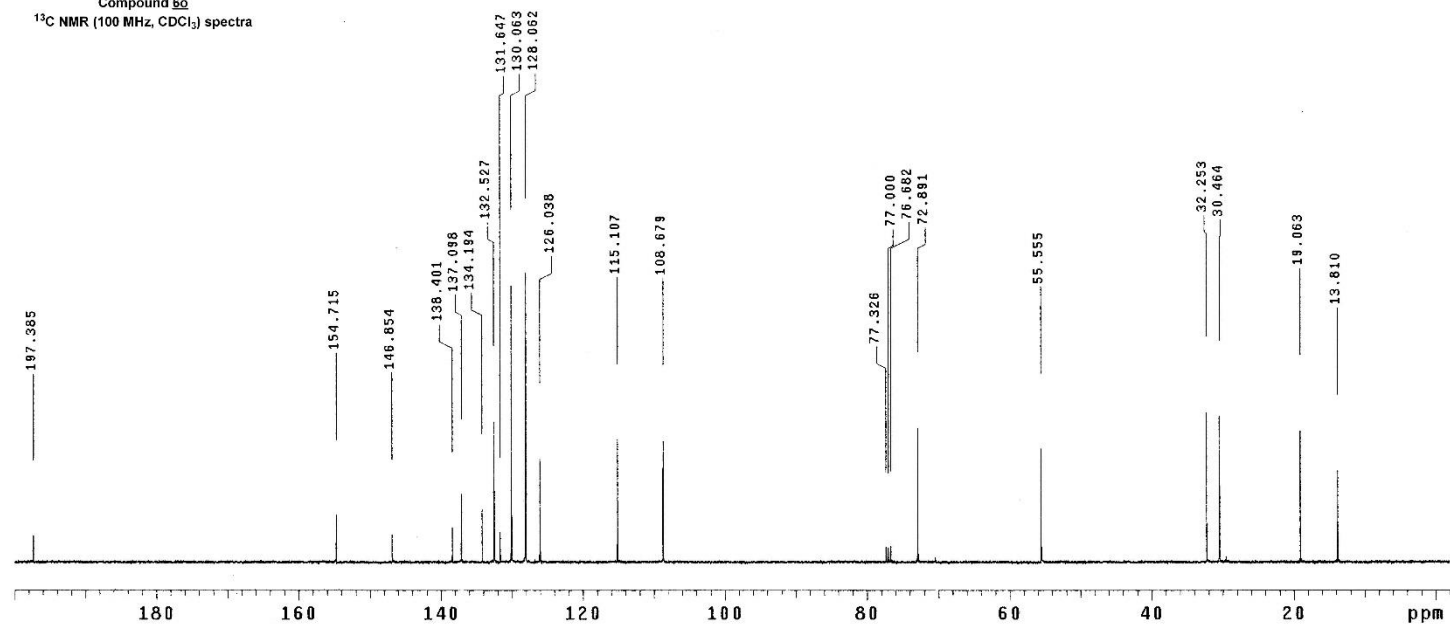

## Compound 6p

YLenon2P

Pulse Sequence: s2pu1

UNITYplus-400 "unity400"

Date: Oct 26 2015

Solvent: CDCl<sub>3</sub>

Ambient temperature

Total 64 repetitions

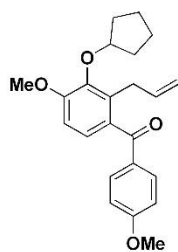

Compound 6p

<sup>1</sup>H NMR (400 MHz, CDCl<sub>3</sub>) spectra

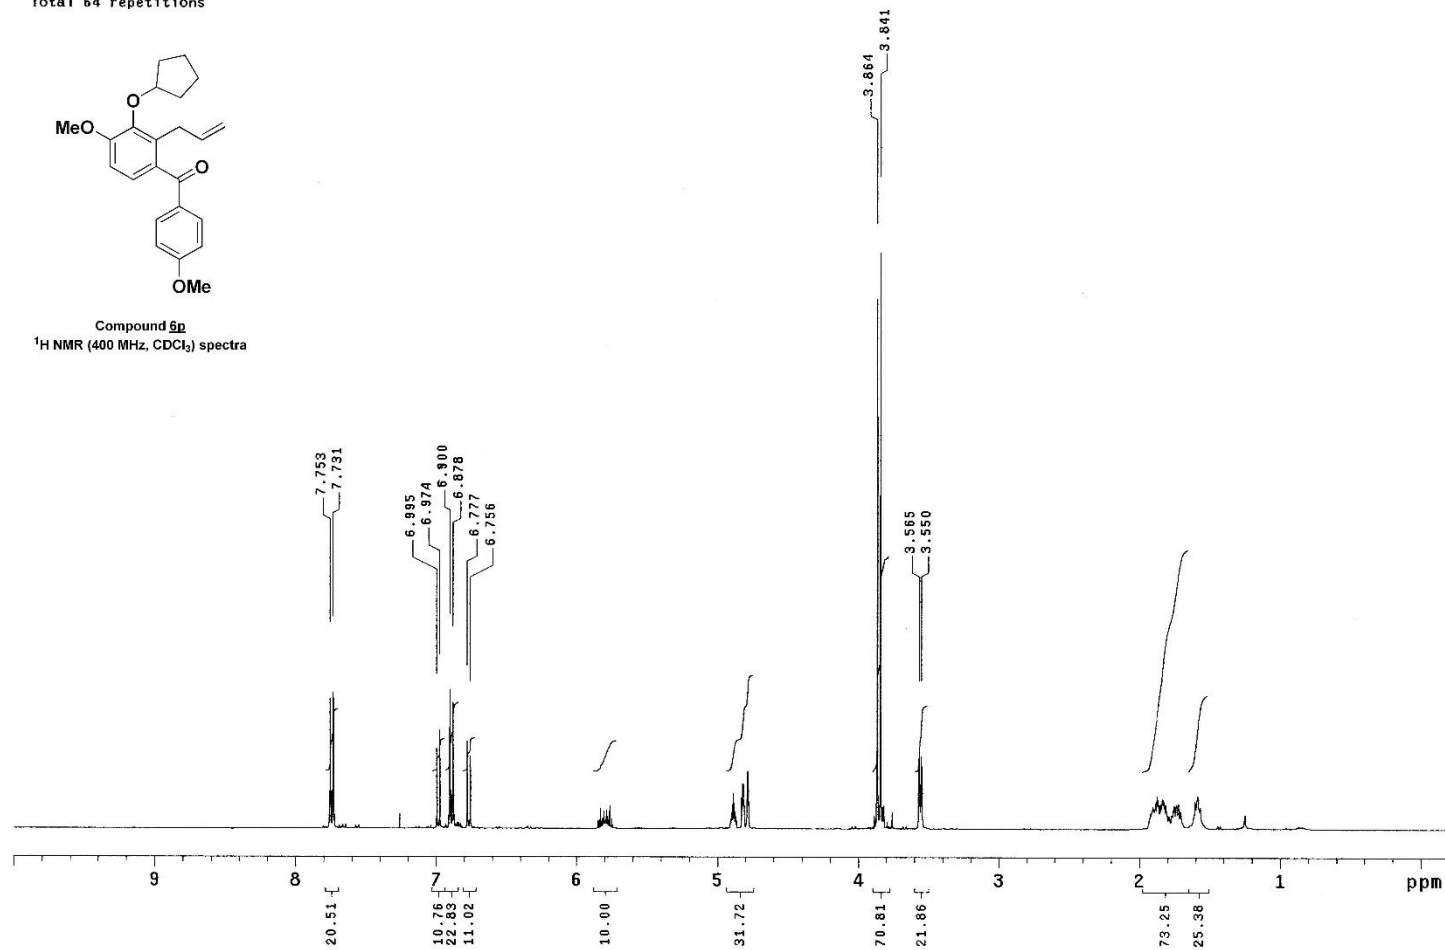

# Compound 6p

YLenon2P

Pulse Sequence: s2pu1

UNITYplus-400 "unity400"

Date: Oct 26 2015

Solvent: CDCl<sub>3</sub>

Ambient temperature

Total 64 repetitions

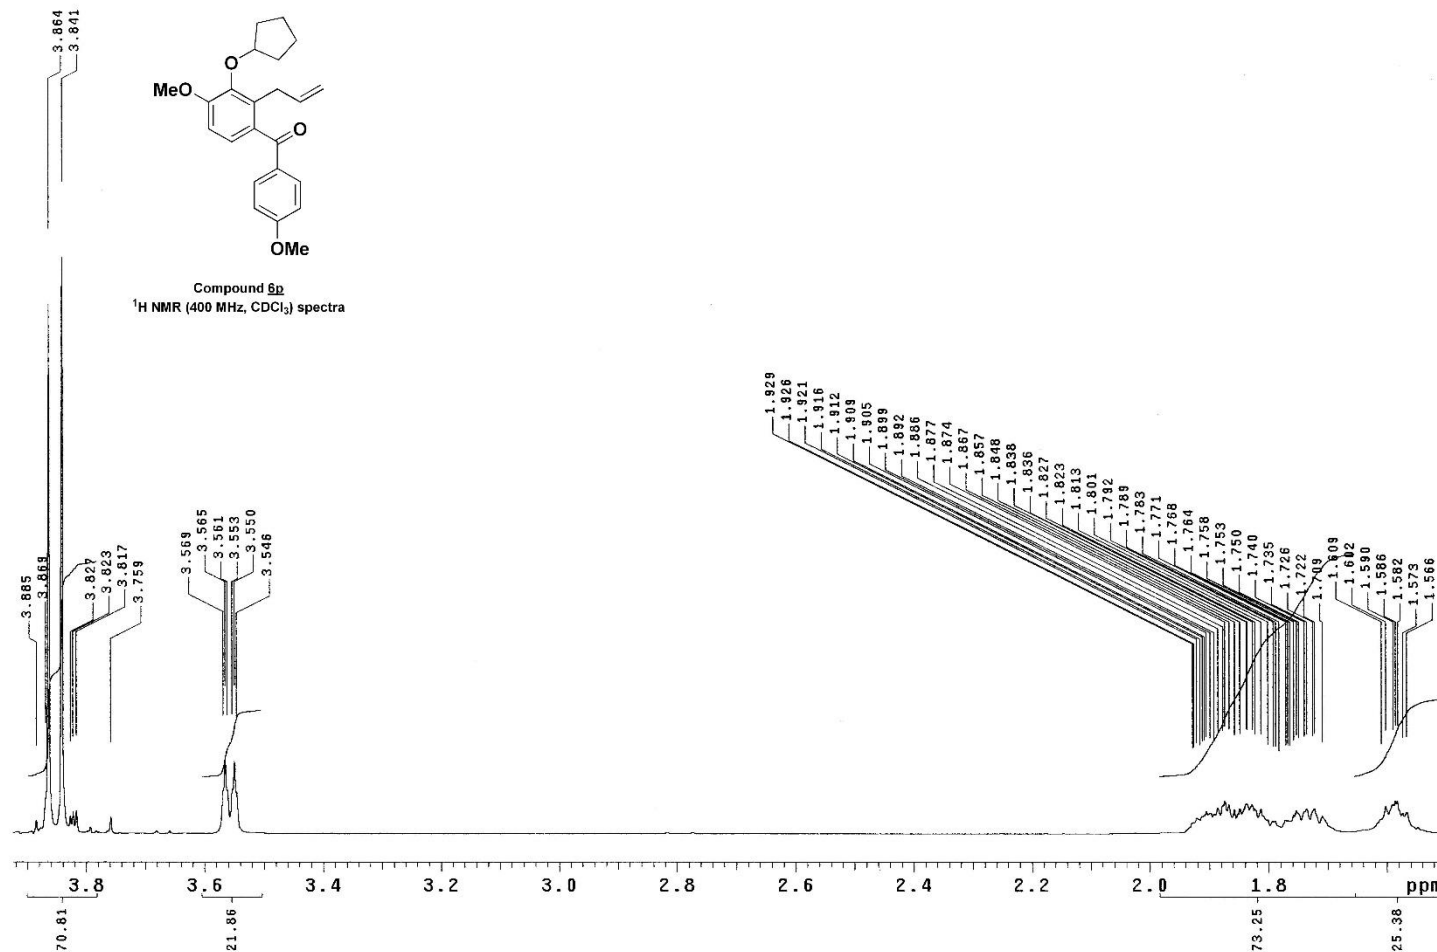

## Compound 6p

YLenon2P

Pulse Sequence: s2pu1

UNITYplus-400 "unity400"

Date: Oct 25 2015

Solvent: CDCl<sub>3</sub>

Ambient temperature

Total 64 repetitions

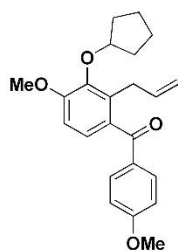

Compound 6p

<sup>1</sup>H NMR (400 MHz, CDCl<sub>3</sub>) spectra

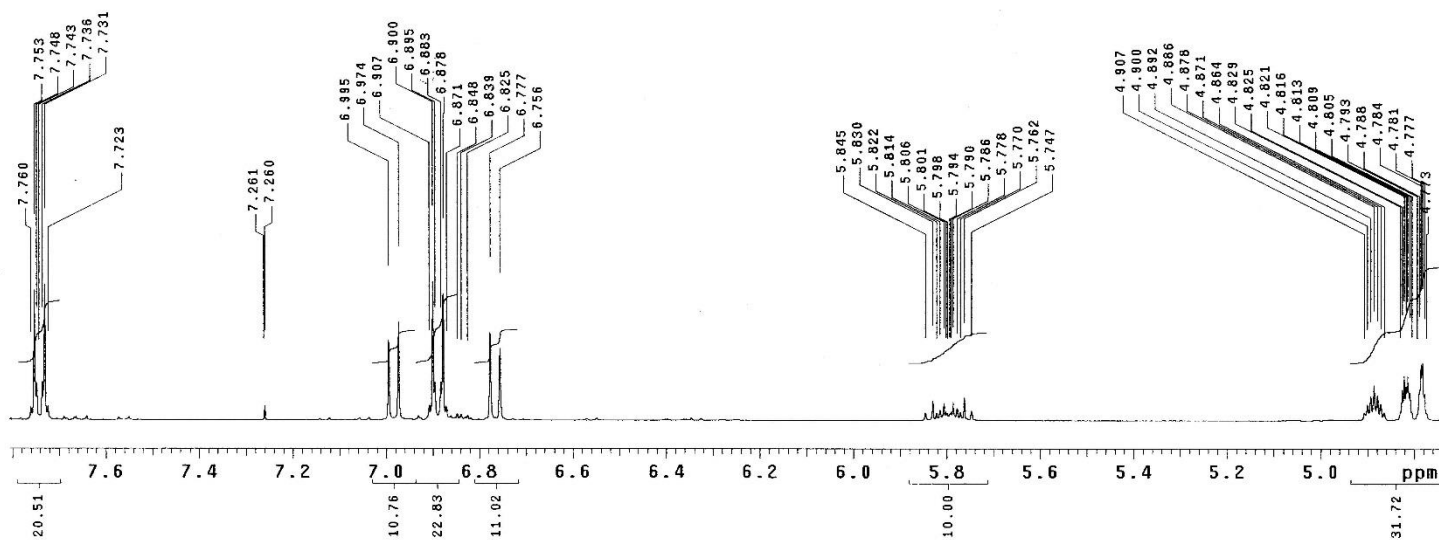

## Compound 6p

YLenon2P

Pulse Sequence: s2pul

UNITYplus-400 "unity400"

Date: Oct 26 2015

Solvent: CDCl<sub>3</sub>

Ambient temperature

Total 256 repetitions

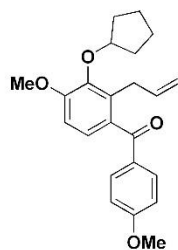

Compound 6p

<sup>13</sup>C NMR (100 MHz, CDCl<sub>3</sub>) spectra

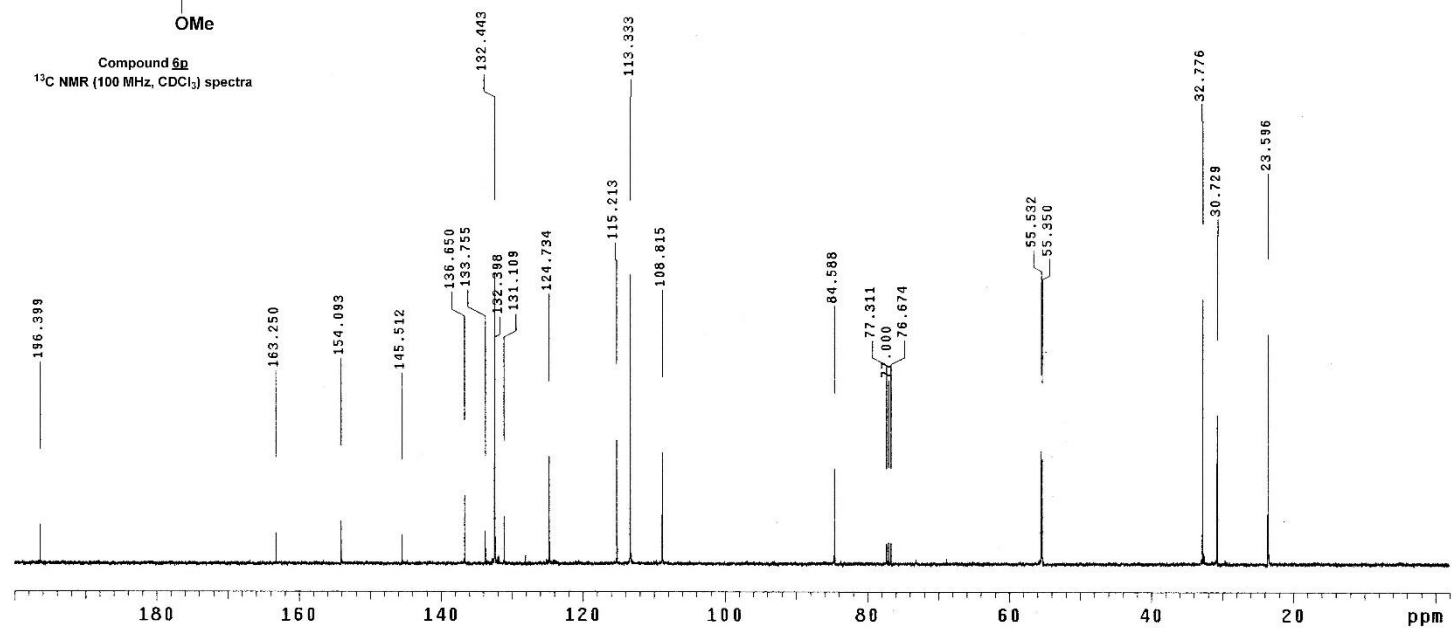



## Compound 6q

YLenon20

Pulse Sequence: s2pul  
UNITYplus-400 "unity400"  
Date: Nov 2 2015  
Solvent: CDCl<sub>3</sub>  
Ambient temperature  
Total 64 repetitions

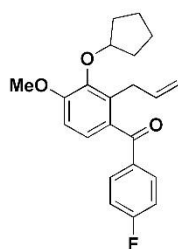

Compound 6q  
<sup>1</sup>H NMR (400 MHz, CDCl<sub>3</sub>) spectra

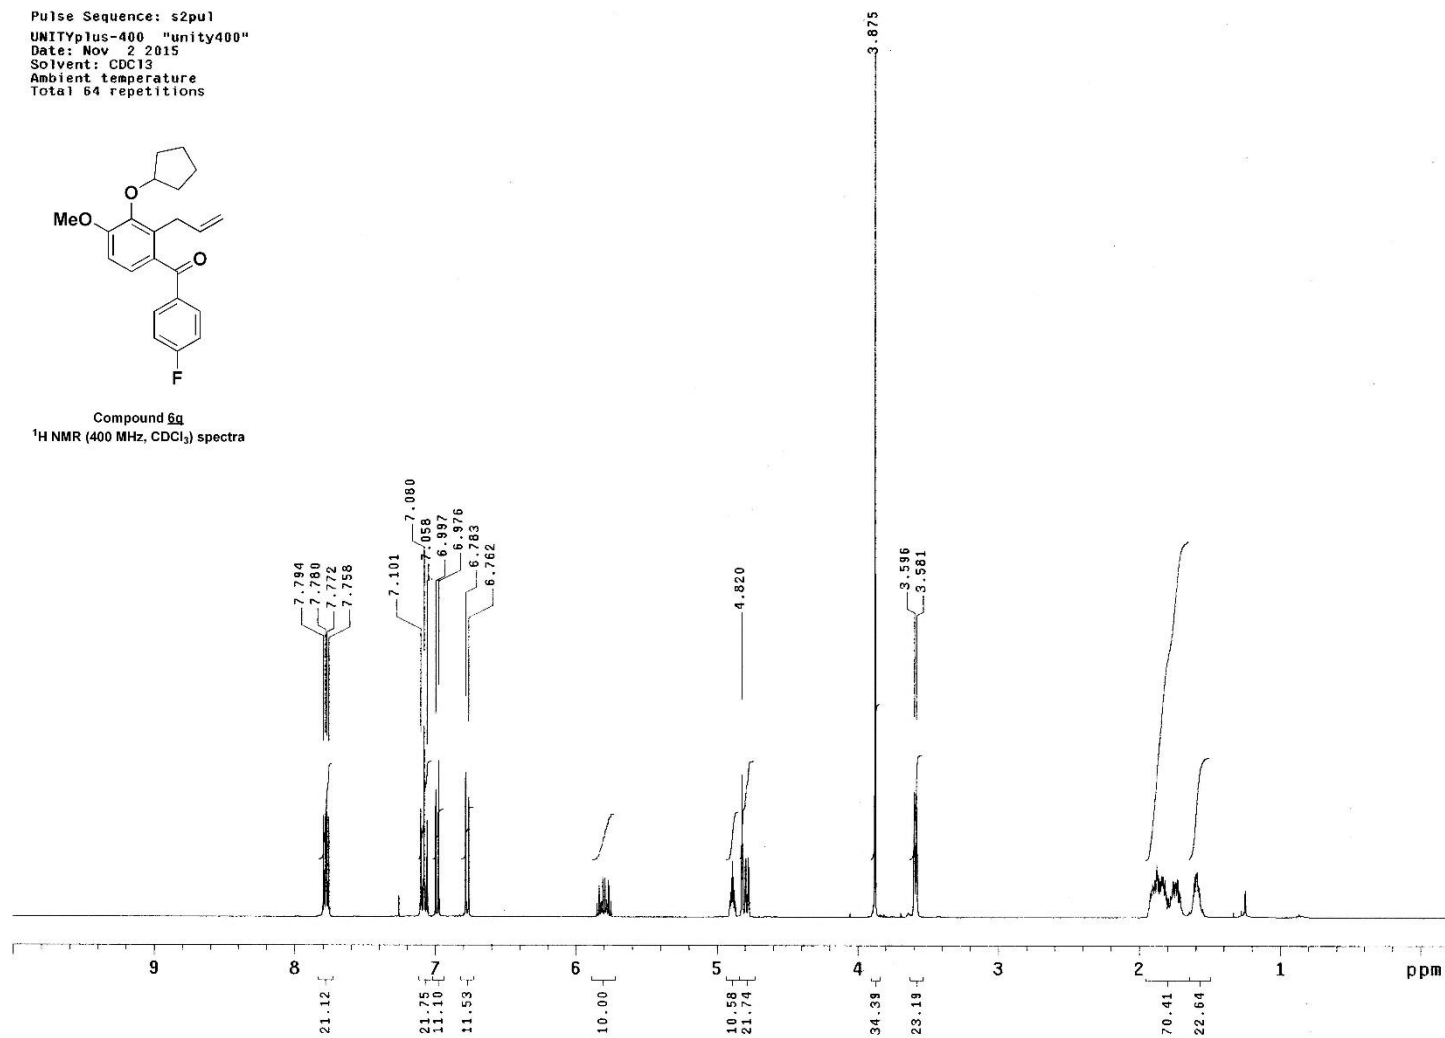

## Compound 6q

YLenon20

Pulse Sequence: s2pul  
UNITYplus-400 "unity400"  
Date: Nov 2 2015  
Solvent: CDCl<sub>3</sub>  
Ambient temperature  
Total 64 repetitions



Compound 6q  
<sup>1</sup>H NMR (400 MHz, CDCl<sub>3</sub>) spectra

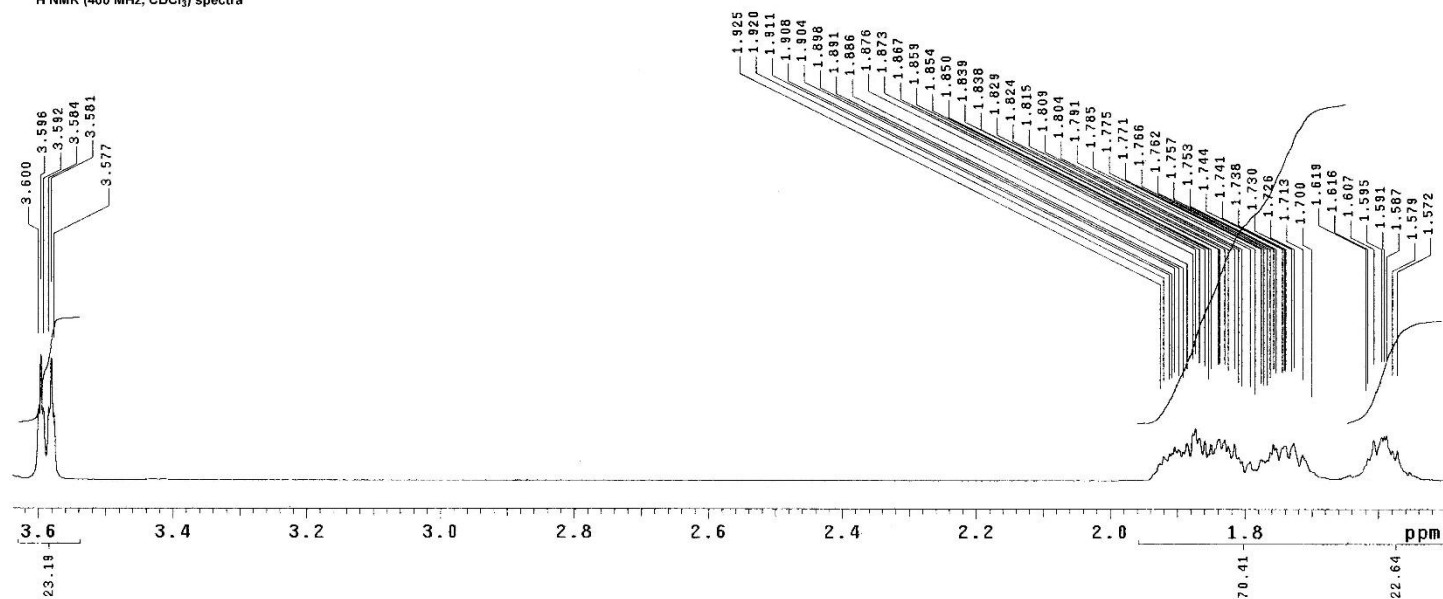

# Compound 6q

YLenon20  
Pulse Sequence: s2pul  
UNITYplus-400 "unity400"  
Date: Nov 2 2015  
Solvent: CDCl<sub>3</sub>  
Ambient temperature  
Total 64 repetitions

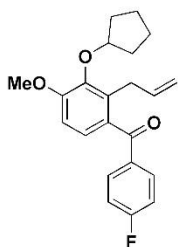

Compound 6q  
<sup>1</sup>H NMR (400 MHz, CDCl<sub>3</sub>) spectra

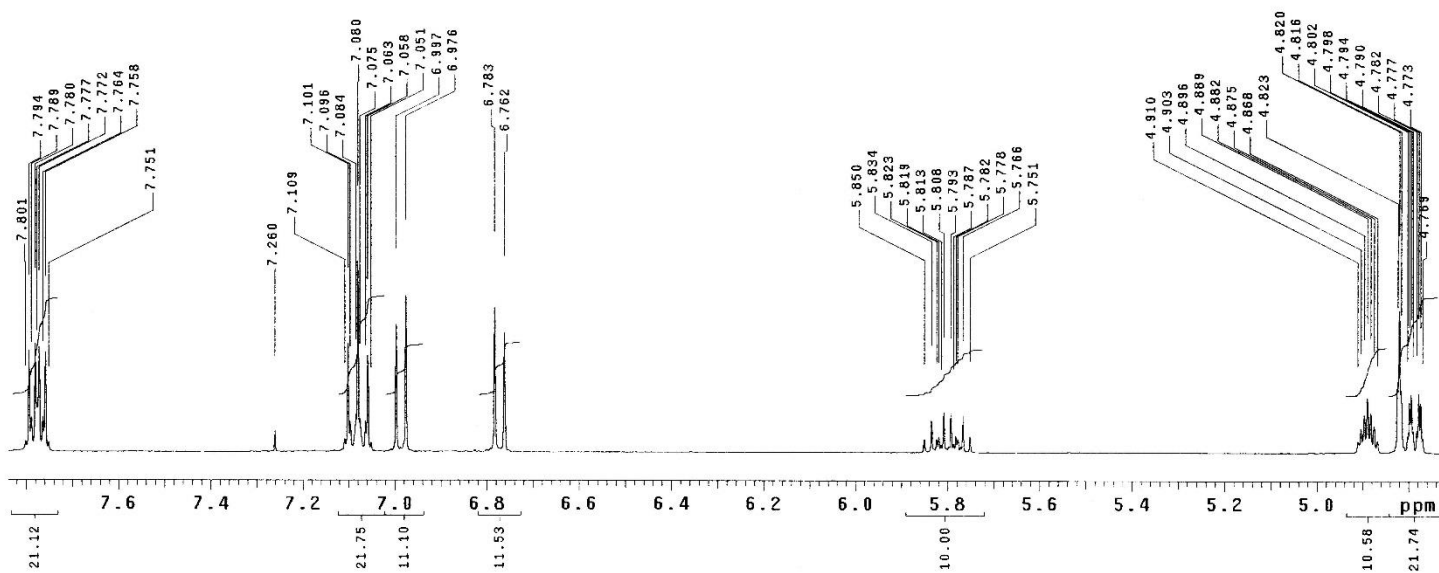

## Compound 6q

YLenon20

Pulse Sequence: s2pul

UNITYplus-400 "unity400"

Date: Nov 2 2015

Solvent: CDCl<sub>3</sub>

Ambient temperature

Total 160 repetitions

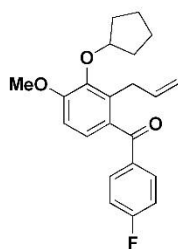

Compound 6q

<sup>13</sup>C NMR (100 MHz, CDCl<sub>3</sub>) spectra

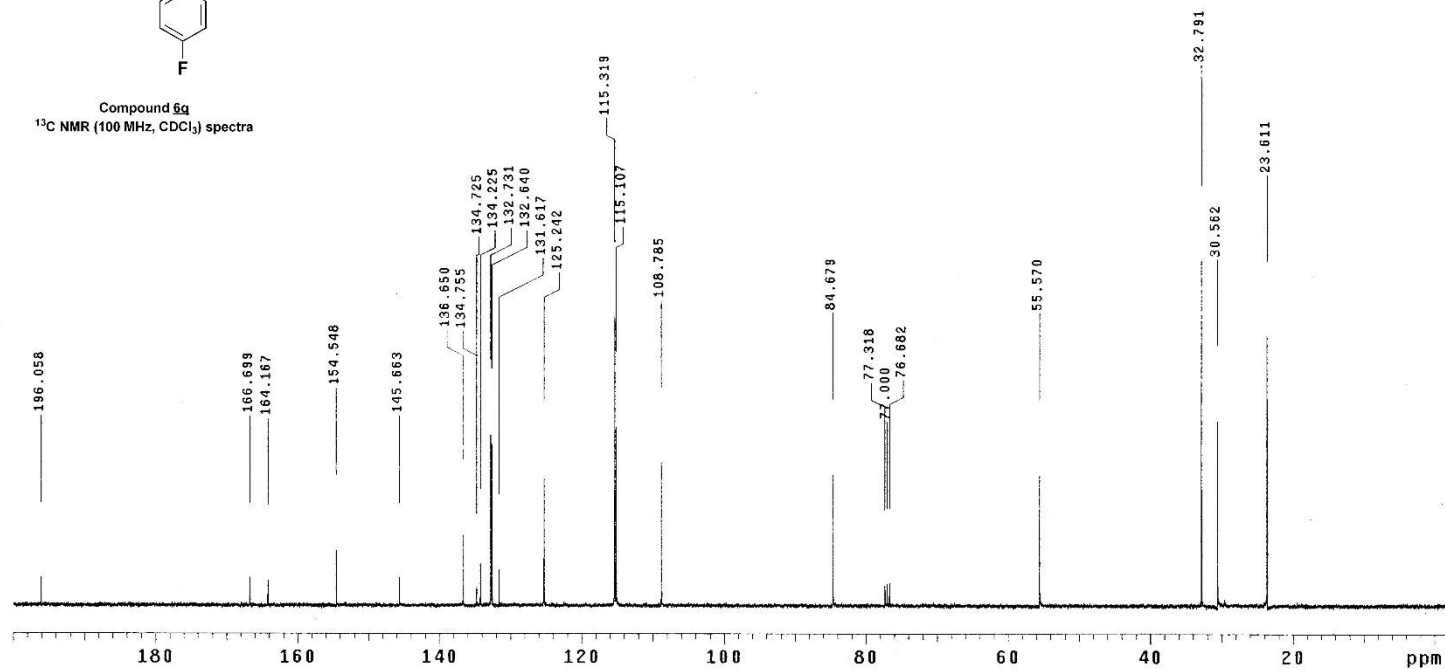

## Compound 6r

YL1041225

Pulse Sequence: s2pu1

UNITYplus-400 "unity400"

Date: Dec 25 2015

Solvent: CDCl<sub>3</sub>

Ambient temperature

Total 64 repetitions

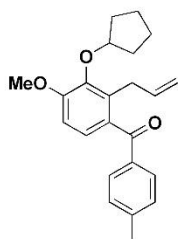

Compound 6r

<sup>1</sup>H NMR (400 MHz, CDCl<sub>3</sub>) spectra

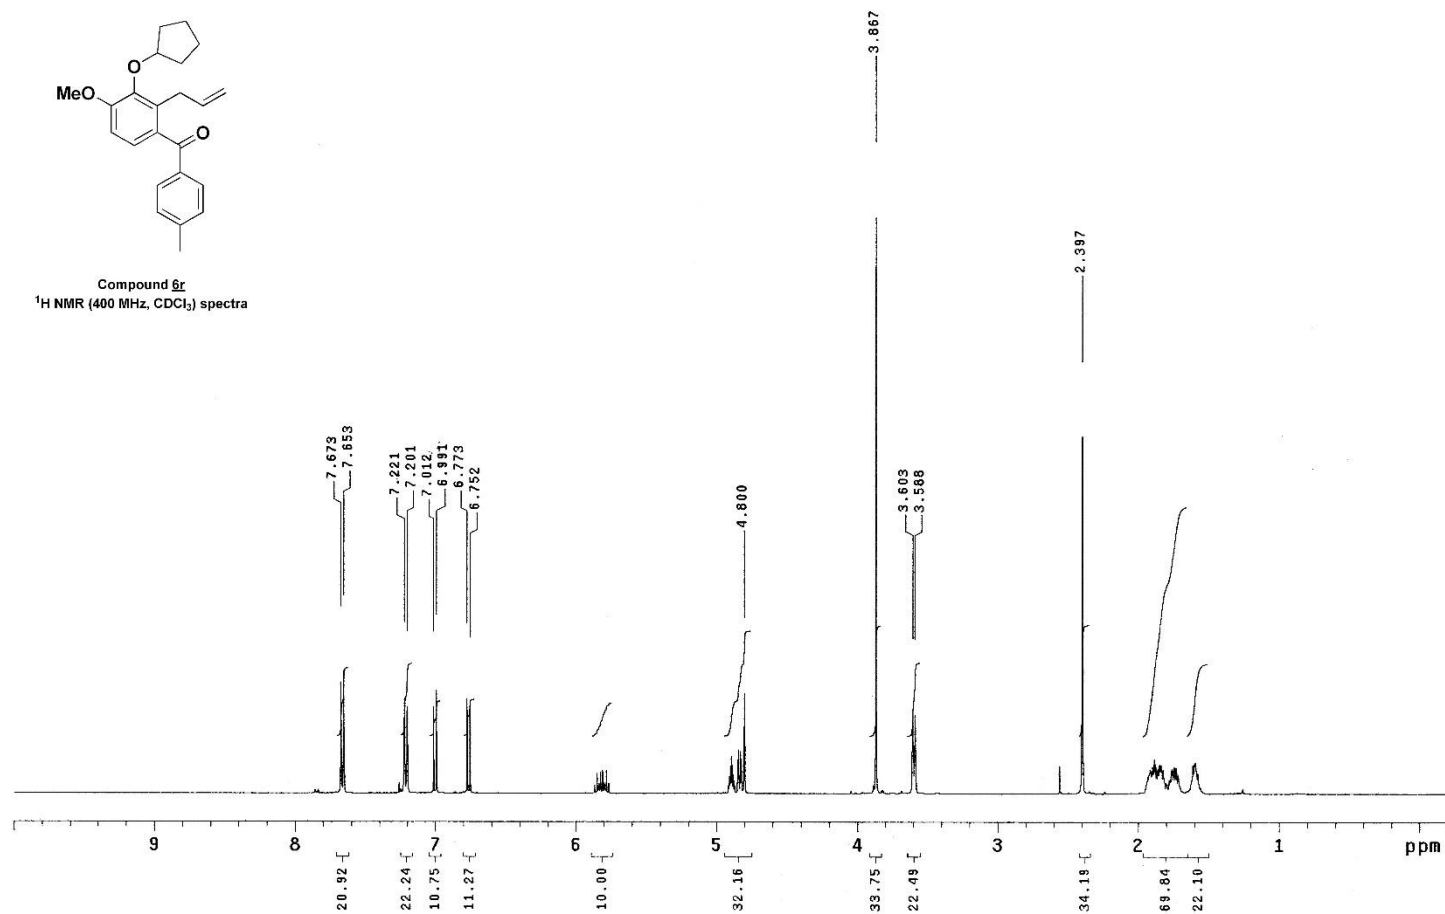

# Compound 6r

YL1041225

Pulse Sequence: s2pu1  
 UNITYplus-400 "unity400"  
 Date: Dec 25 2015  
 Solvent: CDCl<sub>3</sub>  
 Ambient temperature  
 Total 64 repetitions

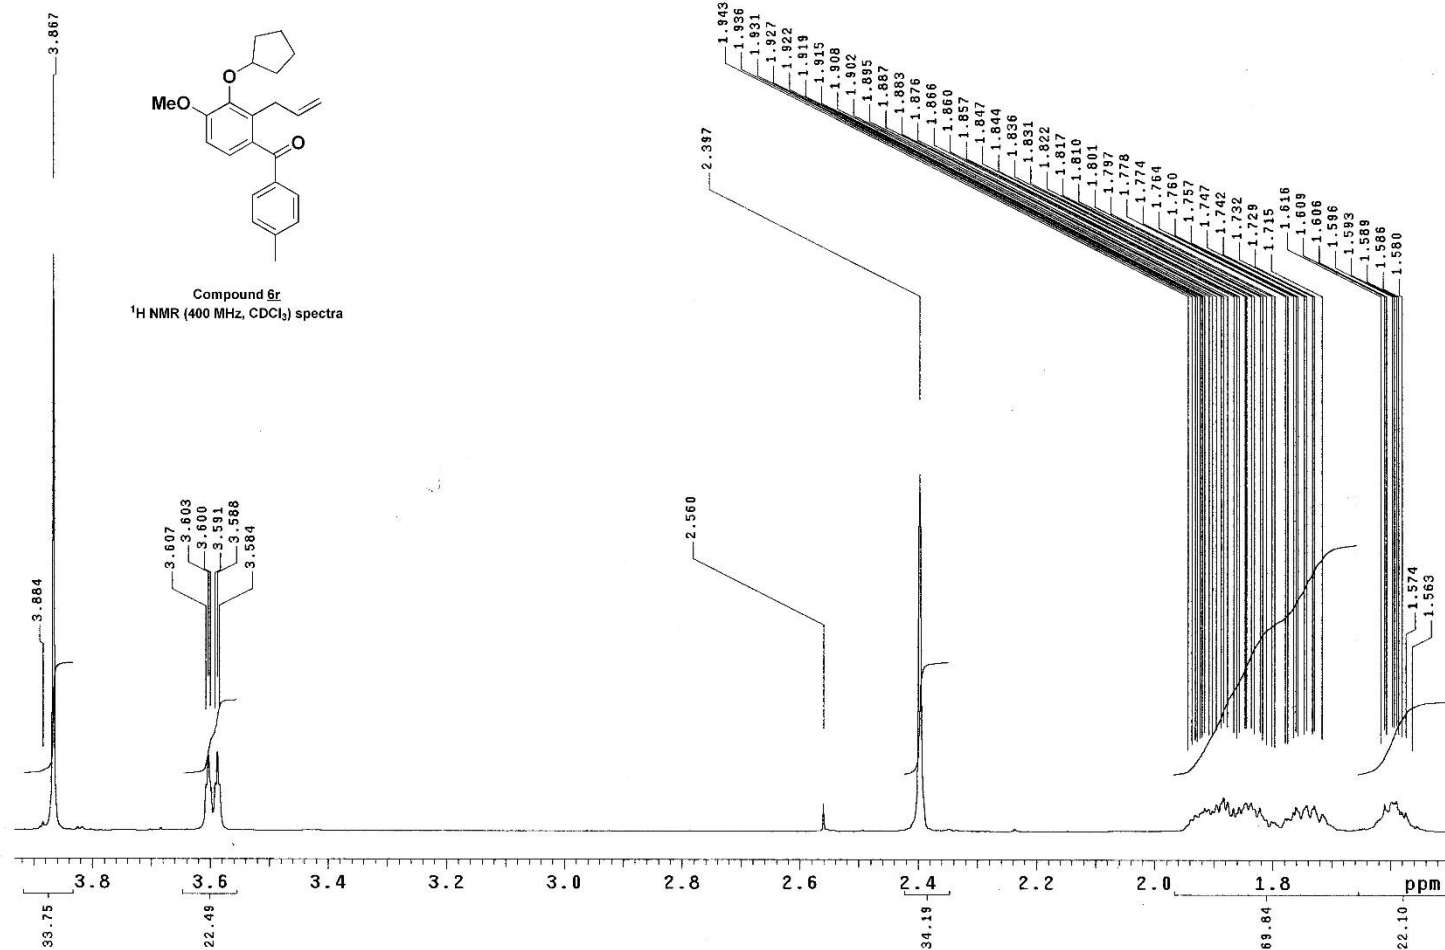

## Compound 6r

YL1041225

Pulse Sequence: s2pu1

UNITYplus-400 "unity400"

Date: Dec 25 2015

Solvent: CDCl<sub>3</sub>

Ambient temperature

Total 64 repetitions

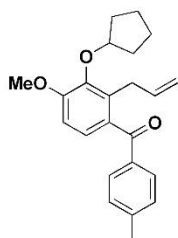

Compound 6r

<sup>1</sup>H NMR (400 MHz, CDCl<sub>3</sub>) spectra

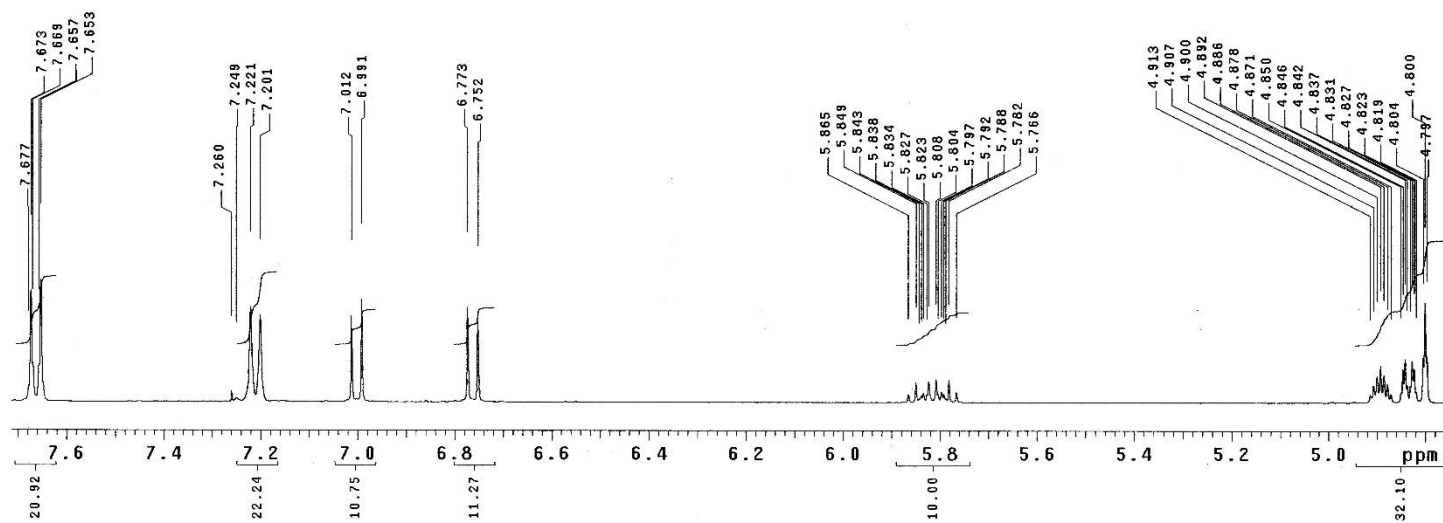

## Compound 6r

YL1041225

Pulse Sequence: s2pu1

UNITYplus-400 "unity400"

Date: Dec 25 2015

Solvent: CDCl<sub>3</sub>

Ambient temperature

Total 336 repetitions

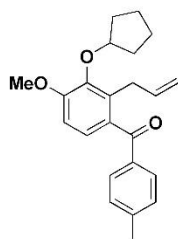

Compound 6r

<sup>13</sup>C NMR (100 MHz, CDCl<sub>3</sub>) spectra

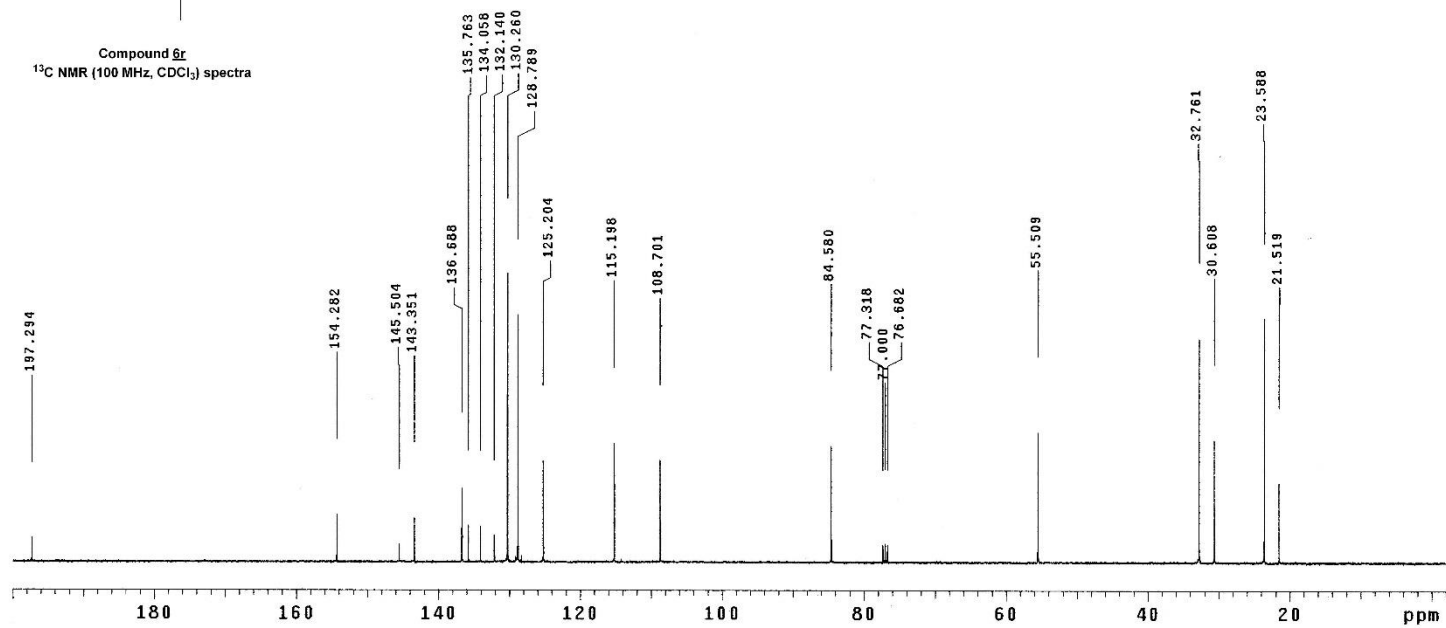



# Compound 6s

YLenon2s

Pulse Sequence: s2pul  
 UNITYplus-400 "unity400"  
 Date: Nov 4 2015  
 Solvent: CDCl<sub>3</sub>  
 Ambient temperature  
 Total 64 repetitions

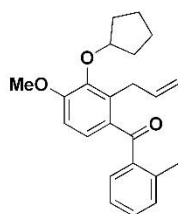

Compound 6s  
<sup>1</sup>H NMR (400 MHz, CDCl<sub>3</sub>) spectra

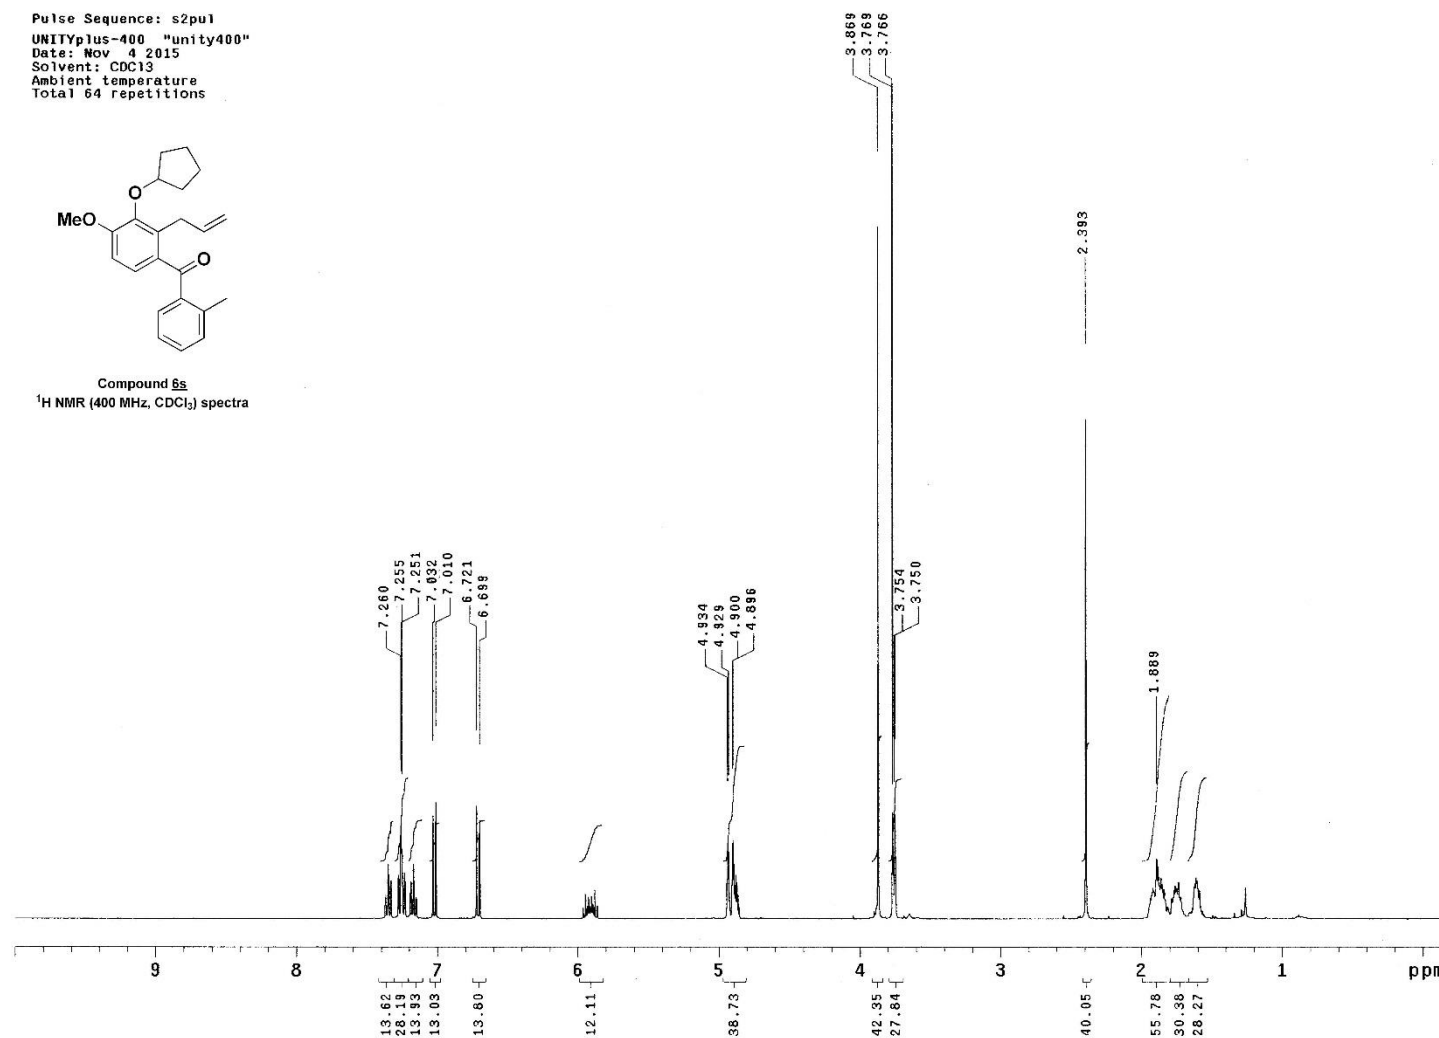

# Compound 6s

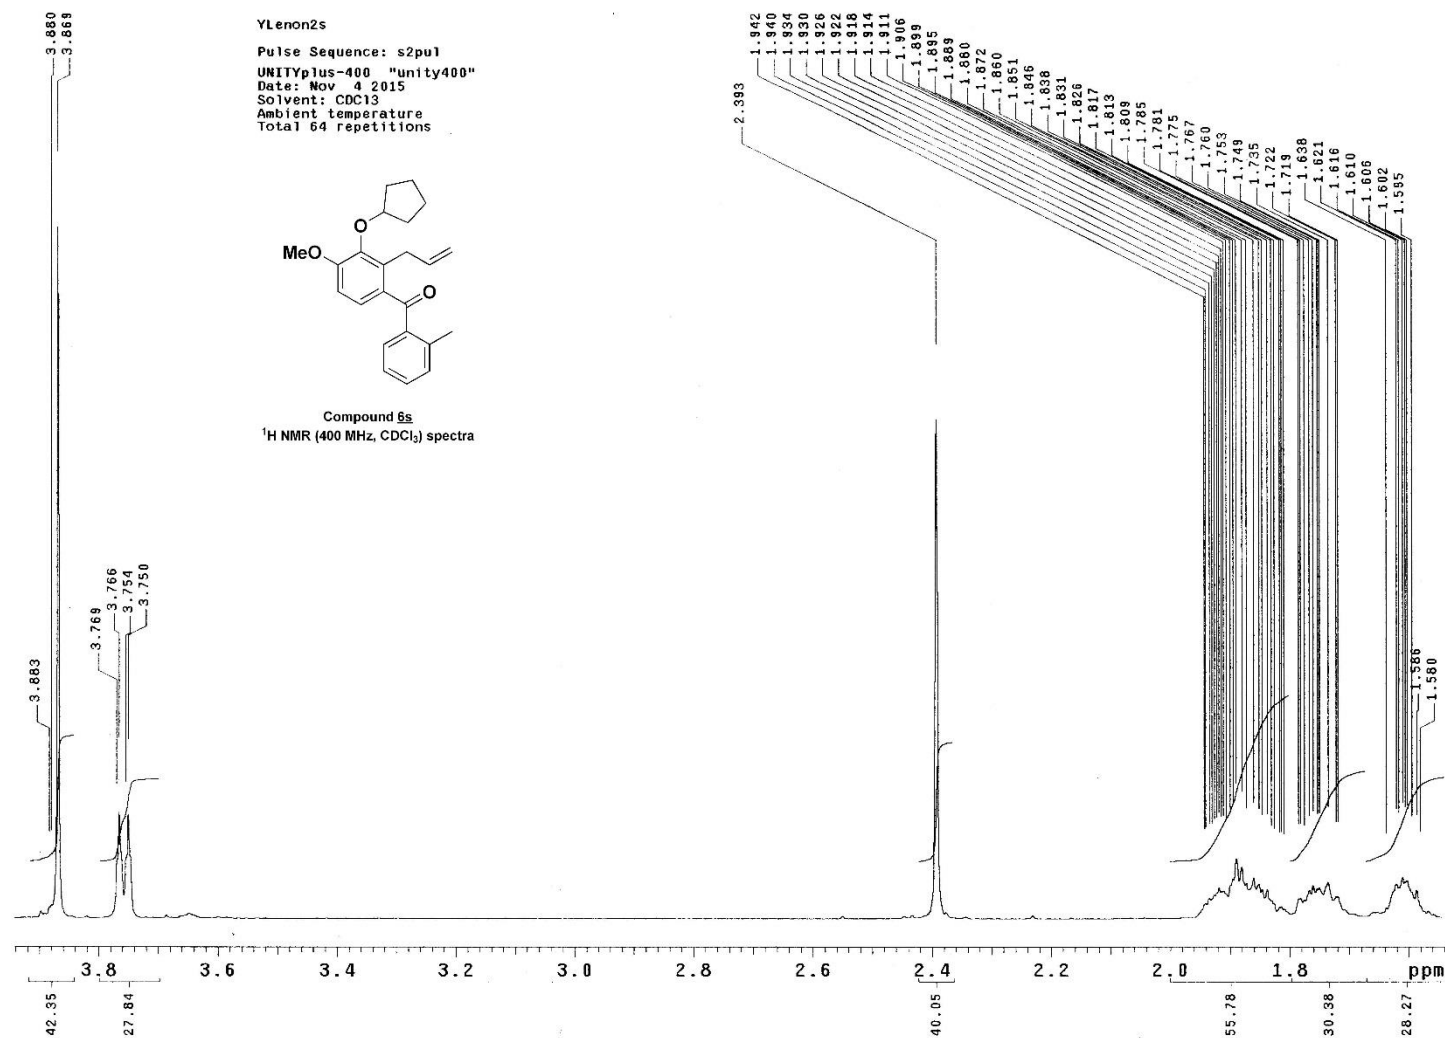

## Compound 6s

YLenon2s

Pulse Sequence: s2pul  
UNITYplus-400 "unity400"  
Date: Nov 4 2015  
Solvent: CDCl<sub>3</sub>  
Ambient temperature  
Total 64 repetitions

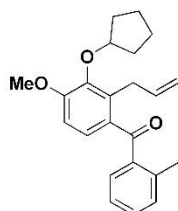

Compound 6s  
<sup>1</sup>H NMR (400 MHz, CDCl<sub>3</sub>) spectra

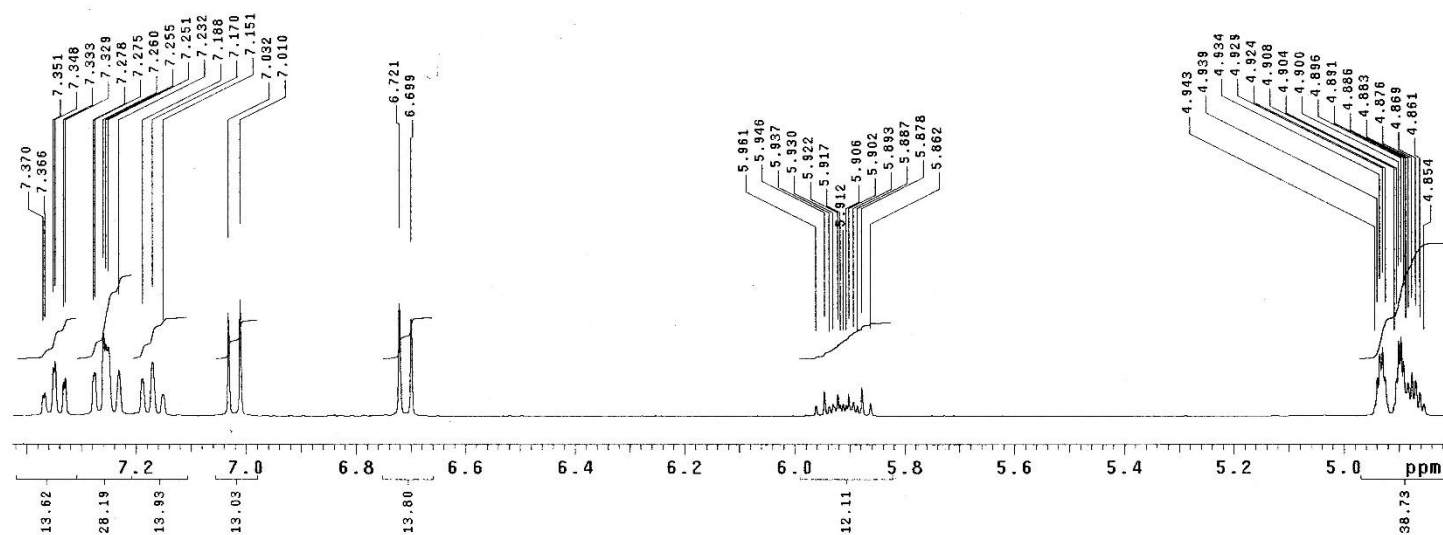

## Compound 6s

YLenon2s  
Pulse Sequence: s2pu1  
UNITYplus-400 "unity400"  
Date: Nov 4 2015  
Solvent: CDCl<sub>3</sub>  
Ambient temperature  
Total 928 repetitions

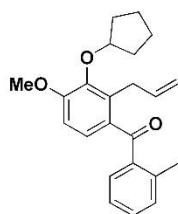

Compound 6s

<sup>13</sup>C NMR (100 MHz, CDCl<sub>3</sub>) spectra

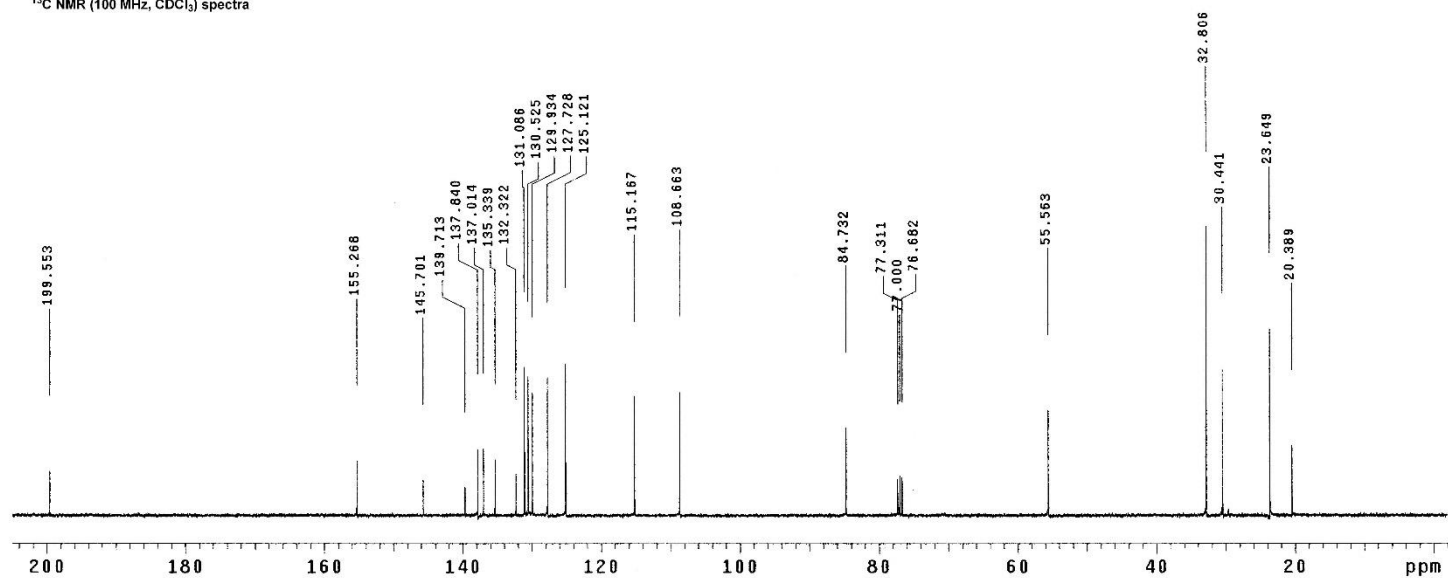

## Compound 6t

YLenon2t

Pulse Sequence: s2pu1

UNITYplus-400 "unity400"

Date: Nov 9 2015

Solvent: CDCl<sub>3</sub>

Ambient temperature

Total 64 repetitions

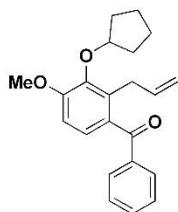

Compound 6t

<sup>1</sup>H NMR (400 MHz, CDCl<sub>3</sub>) spectra

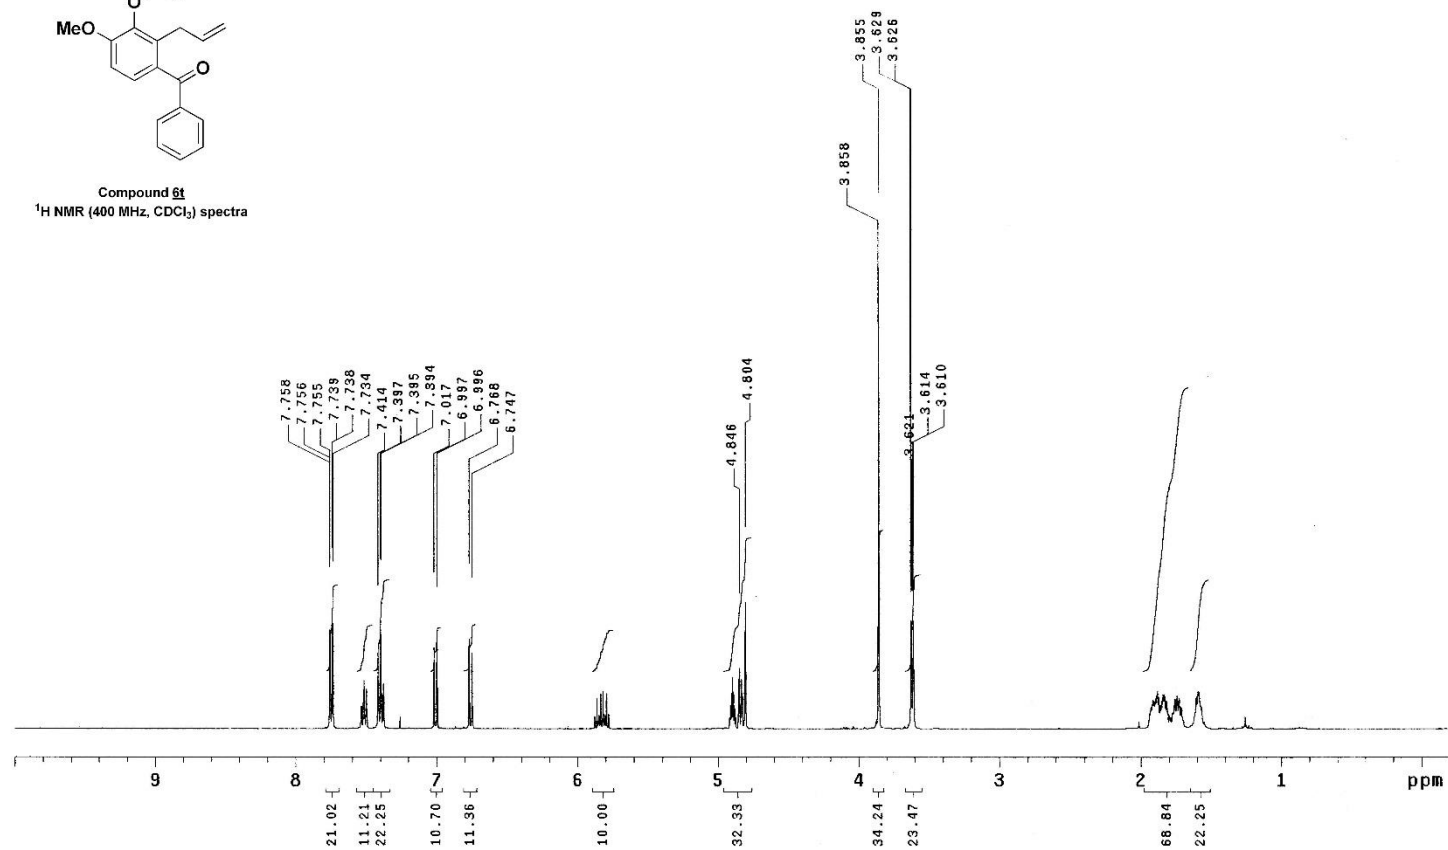

# Compound 6t

YLenon2t

Pulse Sequence: s2pu1

UNITYplus-400 "unity400"

Date: Nov 9 2015

Solvent: CDCl<sub>3</sub>

Ambient temperature

Total 64 repetitions

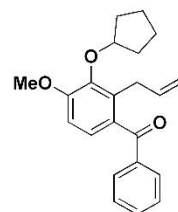

Compound 6t

<sup>1</sup>H NMR (400 MHz, CDCl<sub>3</sub>) spectra

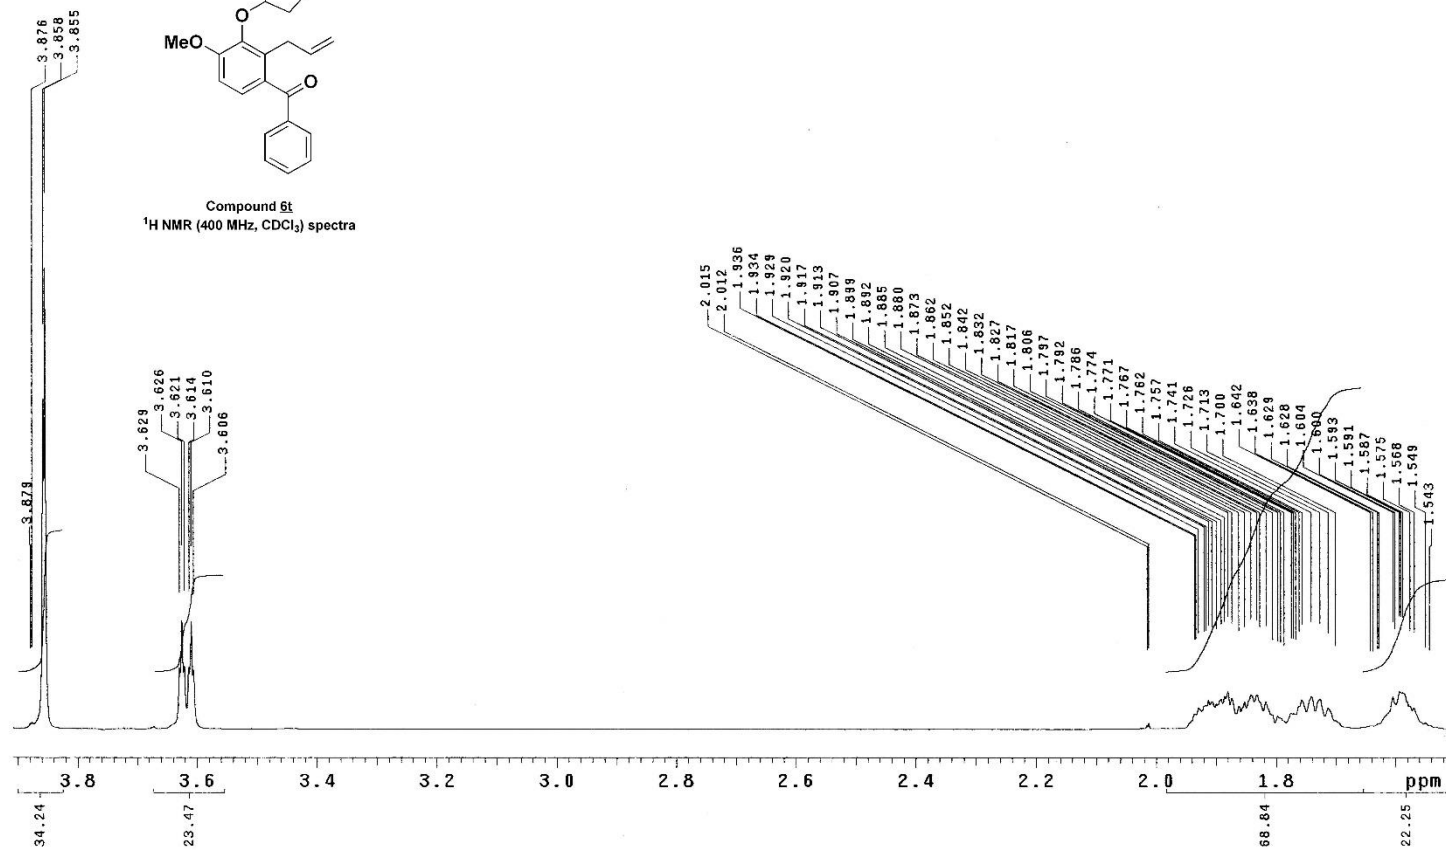

## Compound 6t

YLenon2t

Pulse Sequence: s2pu1

UNITYplus-400 "unity400"

Date: Nov 9 2015

Solvent: CDCl<sub>3</sub>

Ambient temperature

Total 64 repetitions

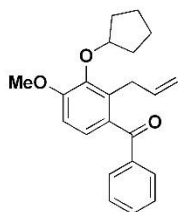

Compound 6t

<sup>1</sup>H NMR (400 MHz, CDCl<sub>3</sub>) spectra

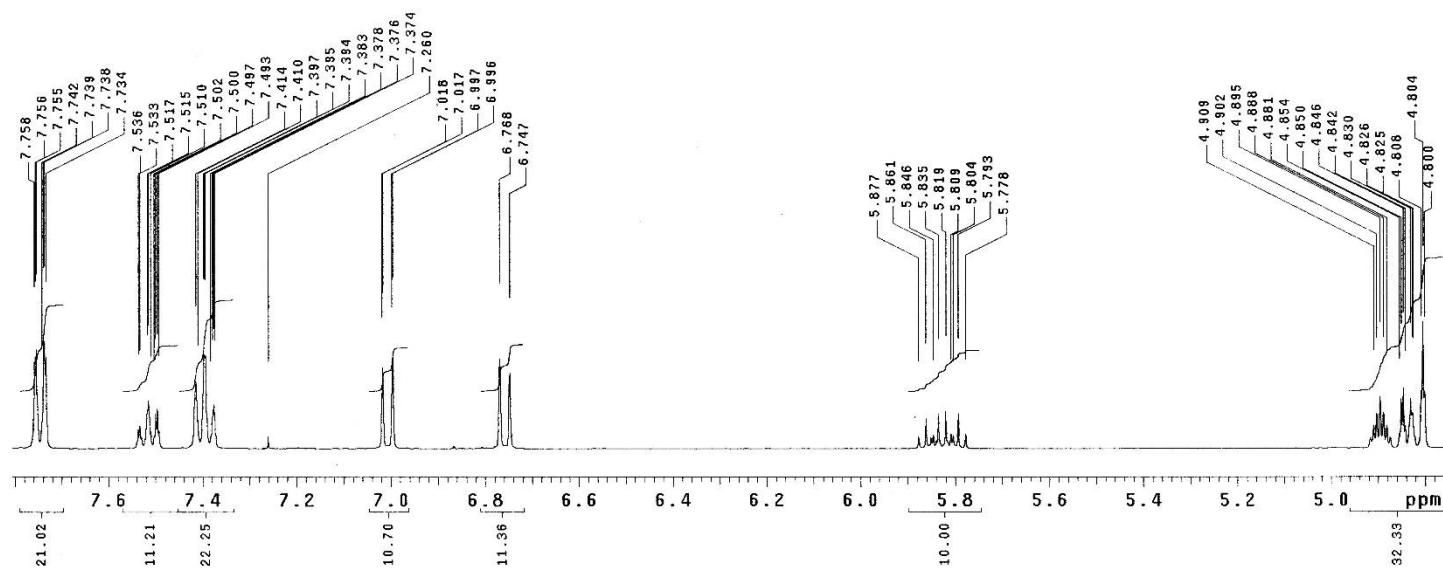

## Compound 6t

YLenon2t

Pulse Sequence: s2pu1

UNITYplus-400 "unity400"

Date: Nov 9 2015

Solvent: CDCl<sub>3</sub>

Ambient temperature

Total 1632 repetitions

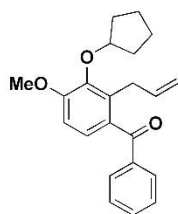

Compound 6t

<sup>13</sup>C NMR (100 MHz, CDCl<sub>3</sub>) spectra

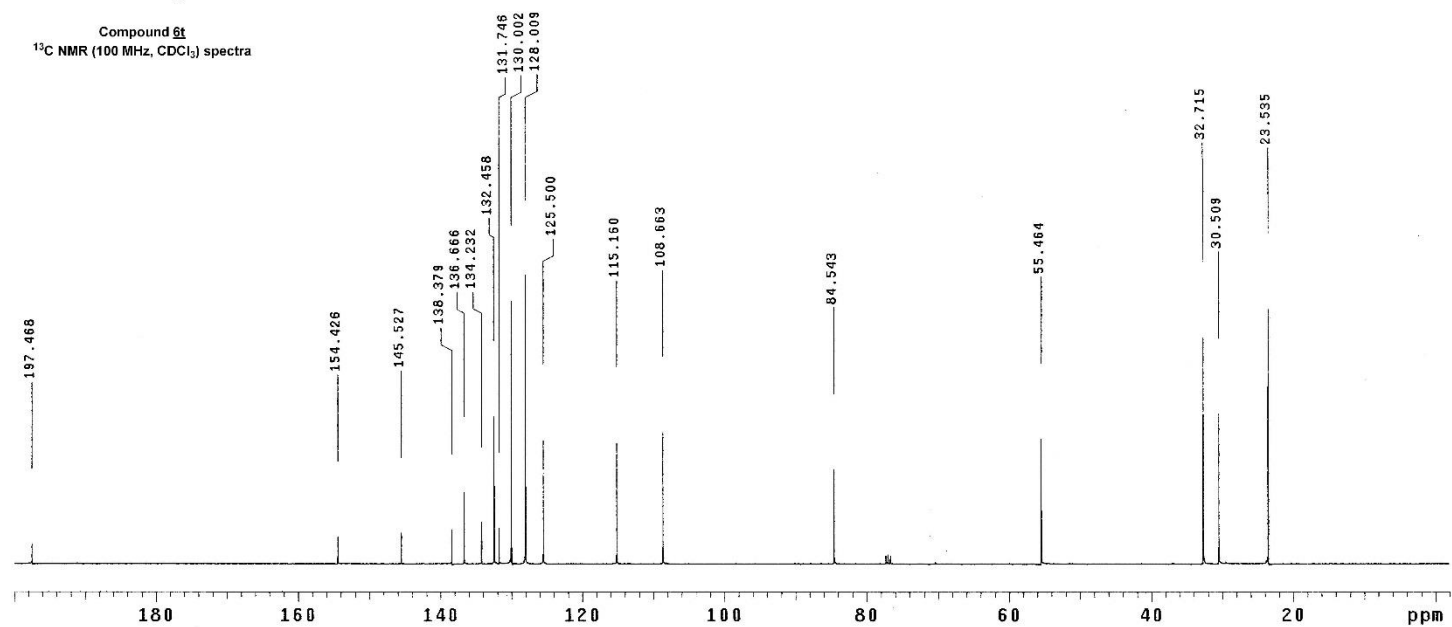



## Compound 6u

YLenon2u

Pulse Sequence: s2pu1

UNITYplus-400 "unity400"

Date: Nov 2 2015

Solvent: CDCl<sub>3</sub>

Ambient temperature

Total 64 repetitions

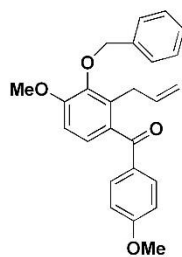

Compound 6u

<sup>1</sup>H NMR (400 MHz, CDCl<sub>3</sub>) spectra

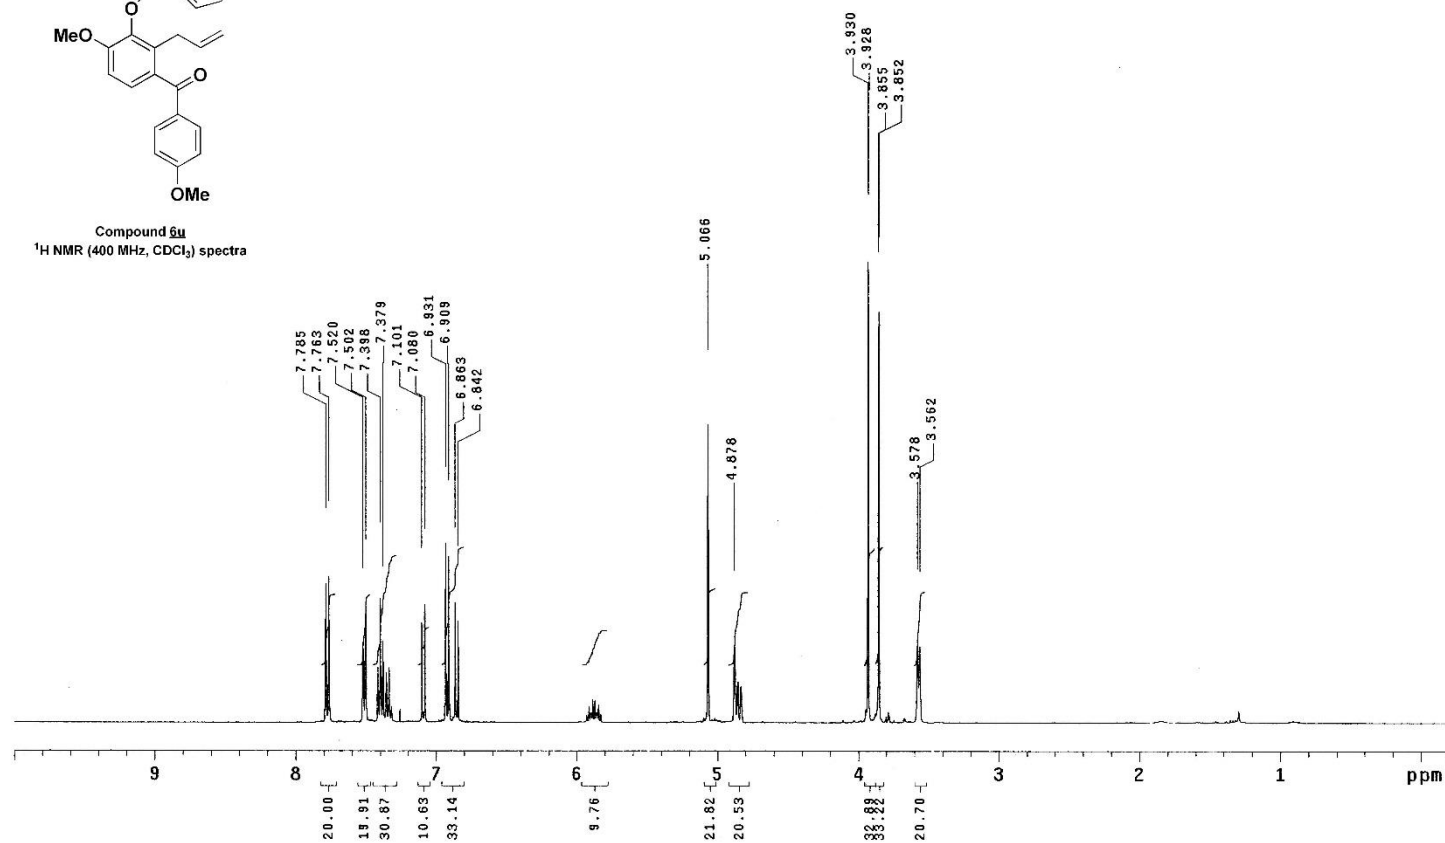

## Compound 6u

YLenon2u

Pulse Sequence: s2pul

UNITYplus-400 "unity400"

Date: Nov 2 2015

Solvent: CDCl<sub>3</sub>

Ambient temperature

Total 64 repetitions

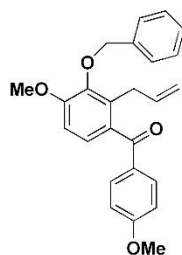

Compound 6u

<sup>1</sup>H NMR (400 MHz, CDCl<sub>3</sub>) spectra

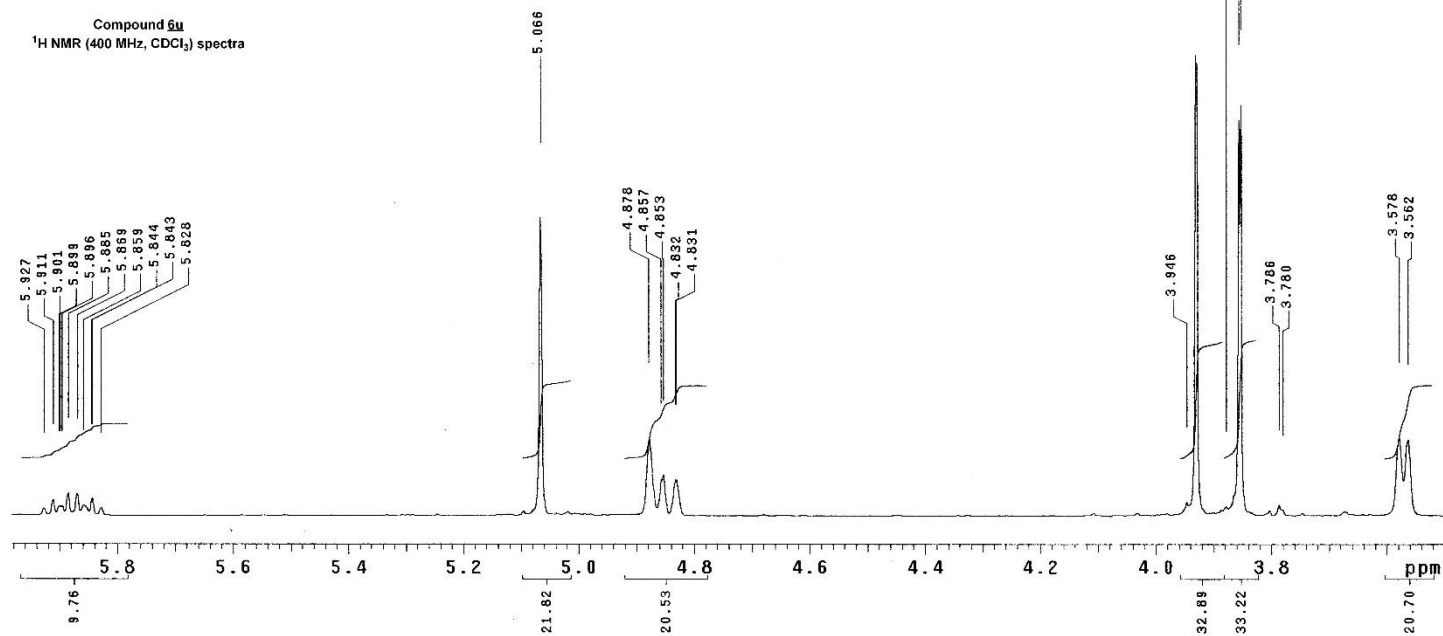

## Compound 6u

YLenon2u

Pulse Sequence: s2pu1

UNITYplus-400 "unity400"

Date: Nov 2 2015

Solvent: CDCl<sub>3</sub>

Ambient temperature

Total 64 repetitions



Compound 6u

<sup>1</sup>H NMR (400 MHz, CDCl<sub>3</sub>) spectra

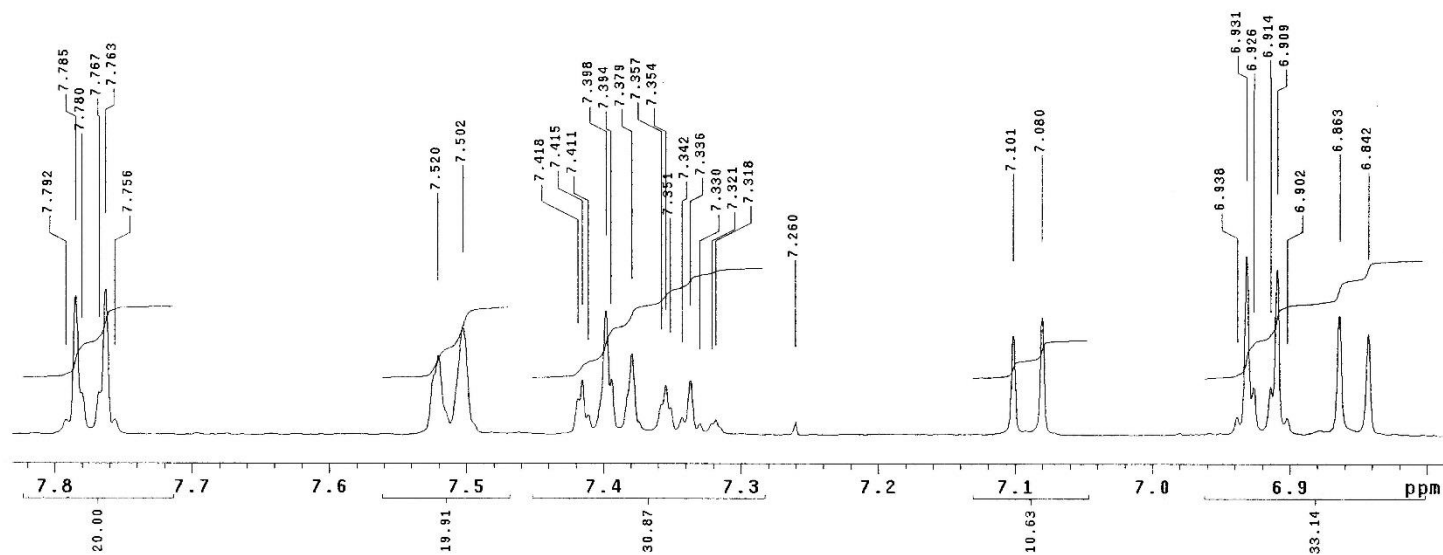

## Compound 6u

YLenon2u

Pulse Sequence: s2pu1

UNITYplus-400 "unity400"

Date: Nov 2 2015

Solvent: CDCl<sub>3</sub>

Ambient temperature

Total 3200 repetitions

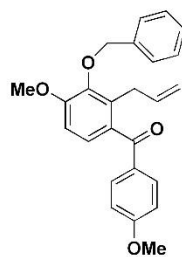

Compound 6u

<sup>13</sup>C NMR (100 MHz, CDCl<sub>3</sub>) spectra

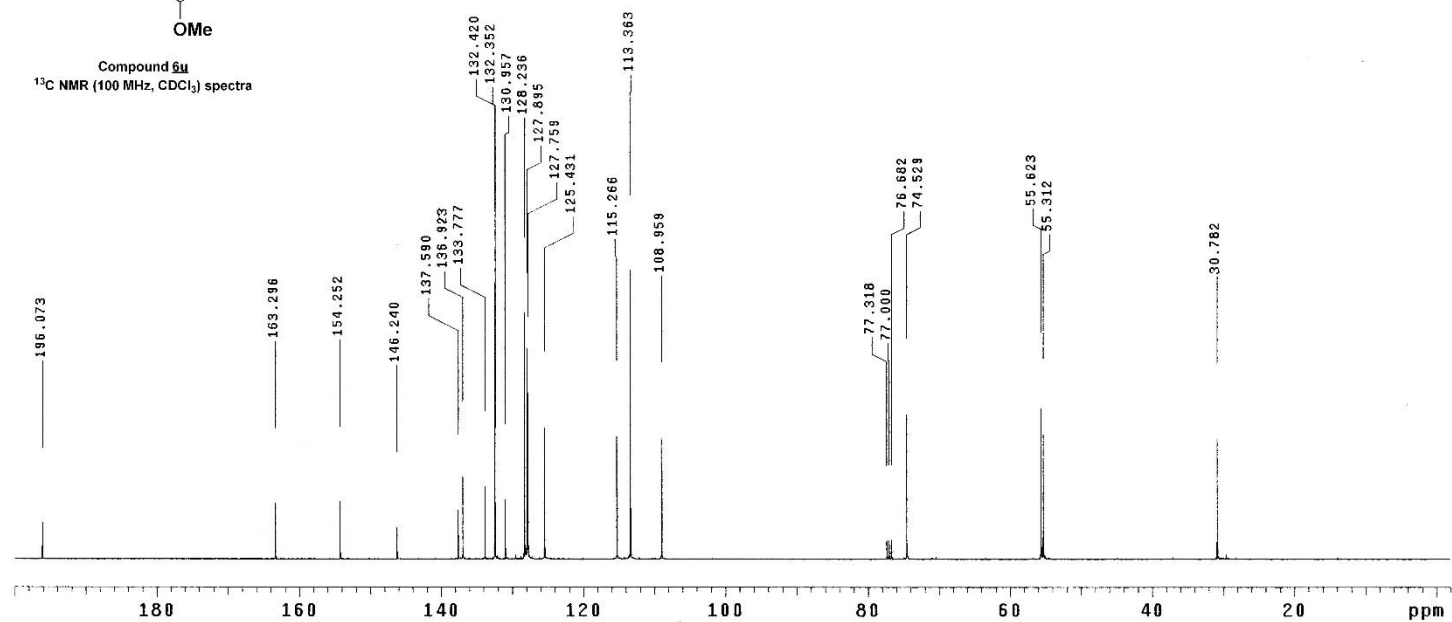

## Compound 6v

YLenon2v

Pulse Sequence: s2pu1

UNITYplus-400 "unity400"

Date: Nov 13 2015

Solvent: CDCl<sub>3</sub>

Ambient temperature

Total 64 repetitions

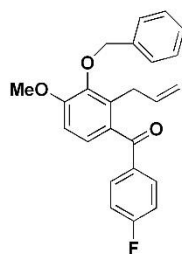

Compound 6v

<sup>1</sup>H NMR (400 MHz, CDCl<sub>3</sub>) spectra

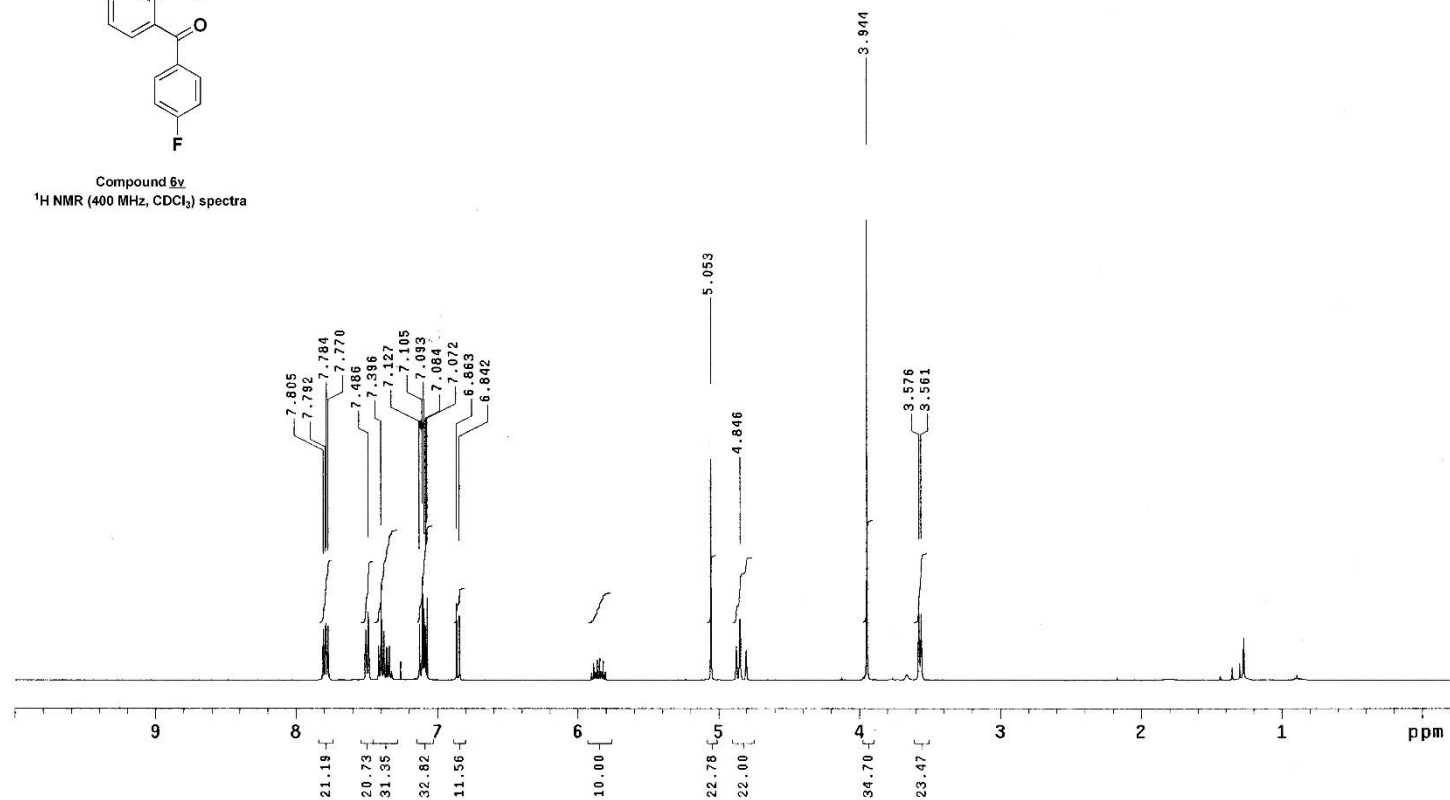

# Compound 6v

YLenon2v

Pulse Sequence: s2pu1  
 UNITYplus-400 "unity400"  
 Date: Nov 13 2015  
 Solvent: CDCl3  
 Ambient temperature  
 Total 64 repetitions

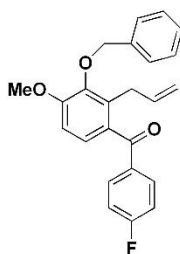

Compound 6v

<sup>1</sup>H NMR (400 MHz, CDCl<sub>3</sub>) spectra

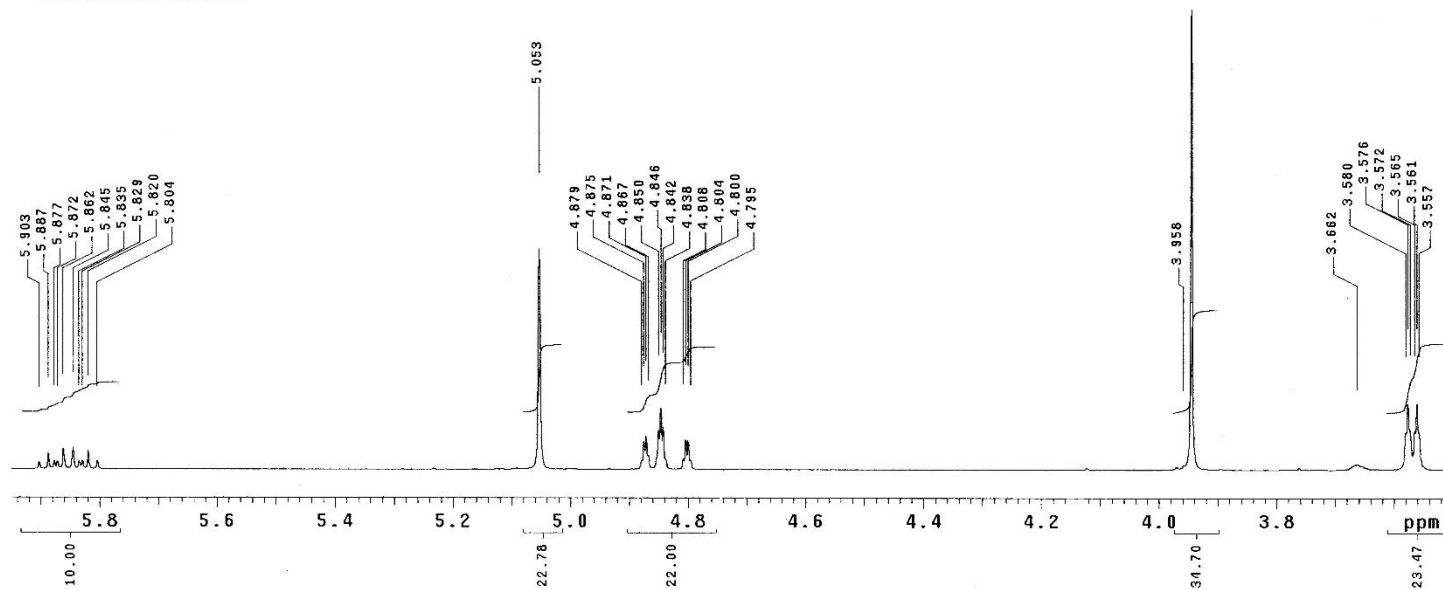

## Compound 6v

YLenon2v

Pulse Sequence: s2pu1

UNITYplus-400 "unity400"

Date: Nov 13 2015

Solvent: CDCl<sub>3</sub>

Ambient temperature

Total 64 repetitions



Compound 6v

<sup>1</sup>H NMR (400 MHz, CDCl<sub>3</sub>) spectra

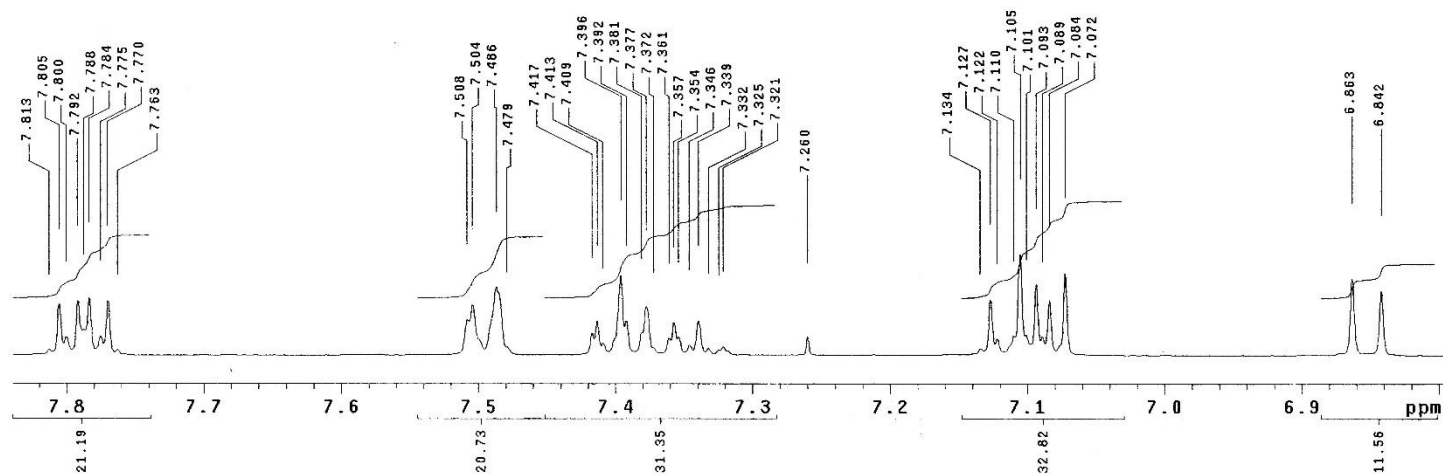

## Compound 6v

YLenon2v  
Pulse Sequence: s2pul  
UNITYplus-400 "unity400"  
Date: Nov 13 2015  
Solvent: CDCl<sub>3</sub>  
Ambient temperature  
Total 512 repetitions

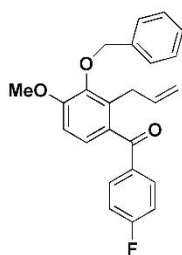

Compound 6v  
<sup>13</sup>C NMR (100 MHz, CDCl<sub>3</sub>) spectra

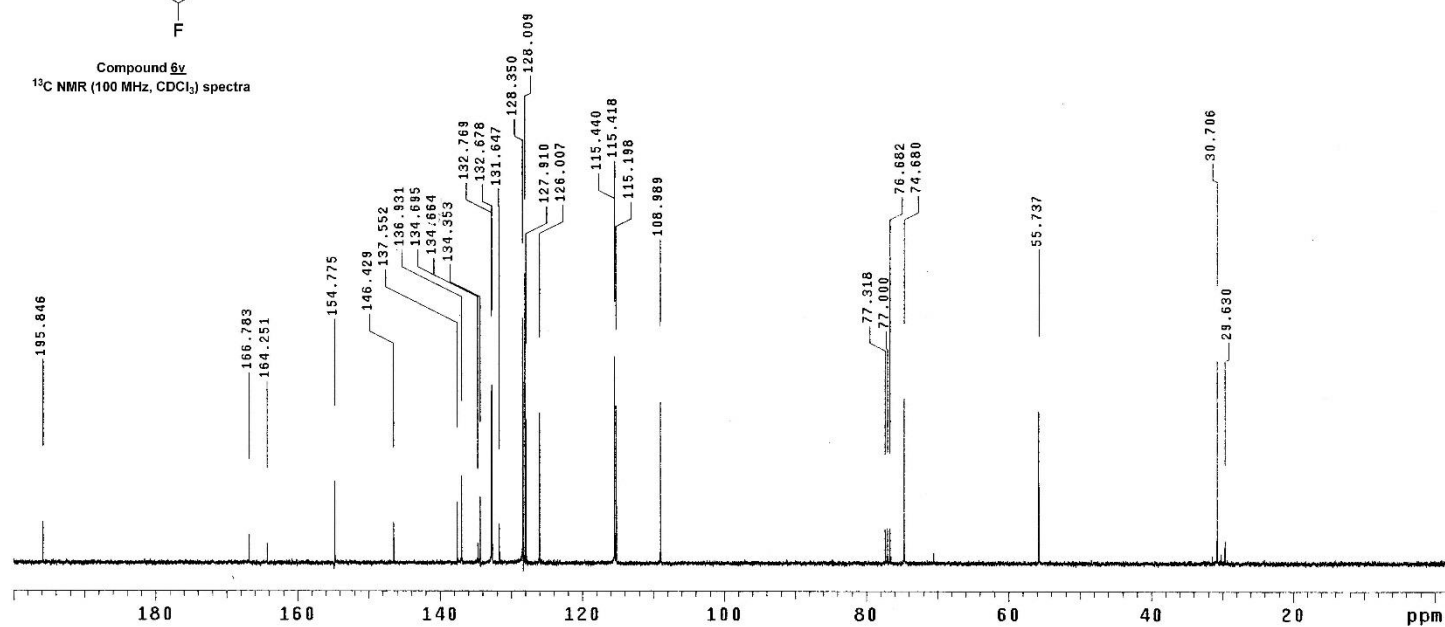



## Compound 6v

YLenon2v  
Pulse Sequence: s2pul  
UNITYplus-400 "unity400"  
Date: Nov 13 2015  
Solvent: CDCl<sub>3</sub>  
Ambient temperature  
Total 512 repetitions

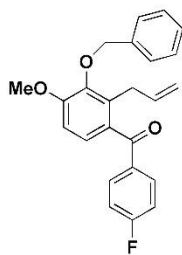

Compound 6v  
<sup>13</sup>C NMR (100 MHz, CDCl<sub>3</sub>) spectra

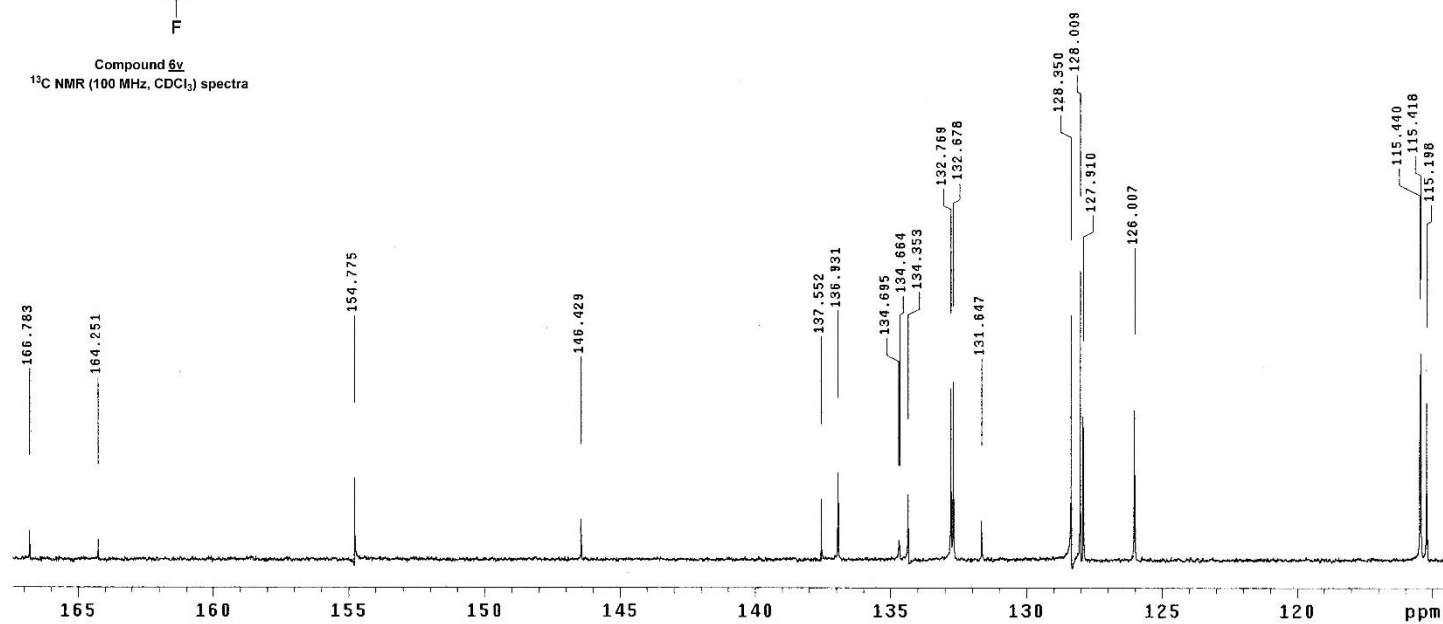

## Compound 6w

YLenon2w

Pulse Sequence: s2pu1

UNITYplus-400 "unity400"

Date: Nov 10 2015

Solvent: CDCl<sub>3</sub>

Ambient temperature

Total 64 repetitions

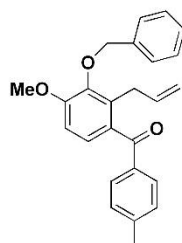

Compound 6w  
<sup>1</sup>H NMR (400 MHz, CDCl<sub>3</sub>) spectra

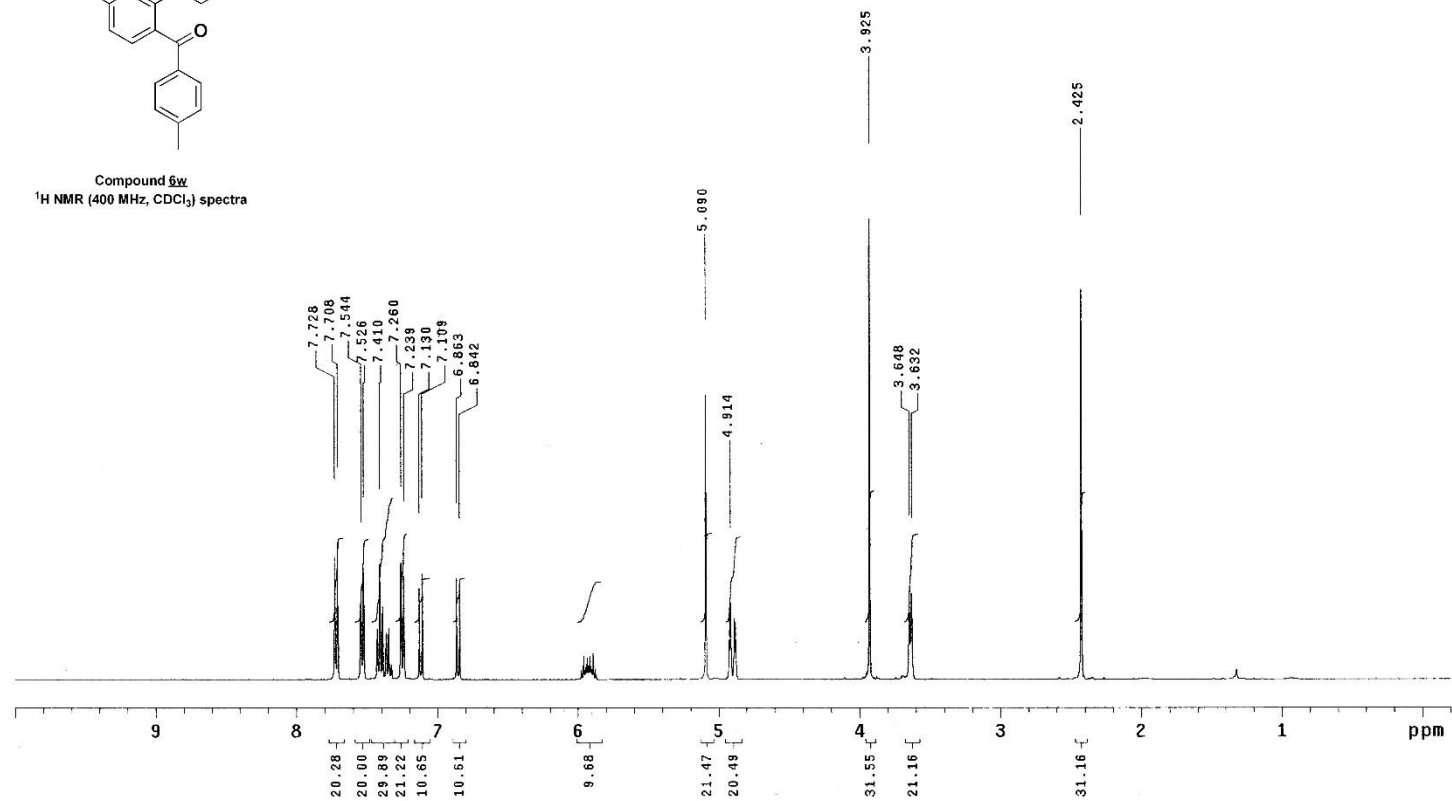

## Compound 6w

YLenon2w

Pulse Sequence: s2pu1

UNITYplus-400 "unity400"

Date: Nov 10 2015

Solvent: CDCl<sub>3</sub>

Ambient temperature

Total 64 repetitions



Compound 6w

<sup>1</sup>H NMR (400 MHz, CDCl<sub>3</sub>) spectra

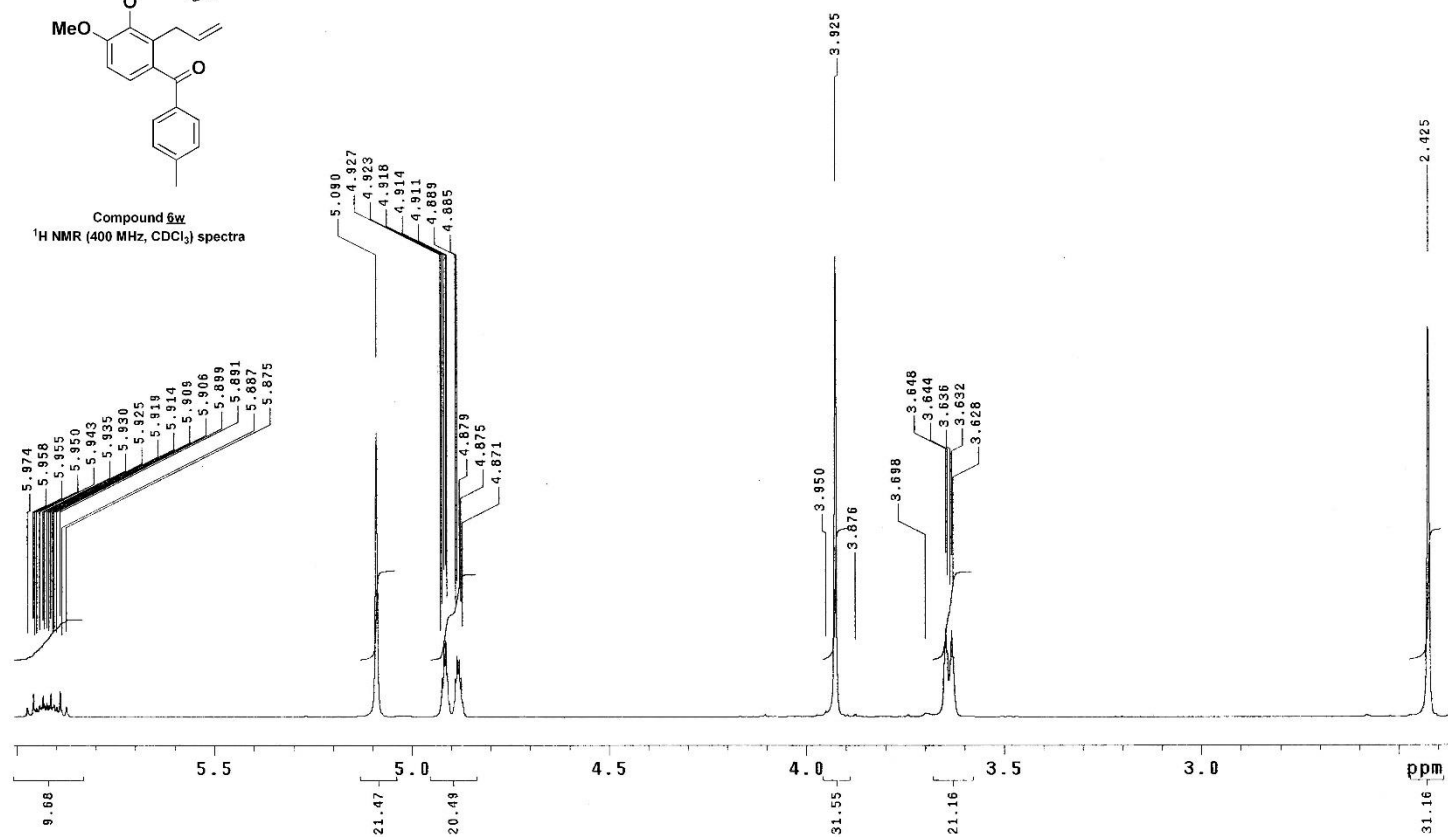

## Compound 6w

YLenon2w

Pulse Sequence: s2pu1

UNITYplus-400 "unity400"

Date: Nov 10 2015

Solvent: CDCl<sub>3</sub>

Ambient temperature

Total 64 repetitions



Compound 6w

<sup>1</sup>H NMR (400 MHz, CDCl<sub>3</sub>) spectra

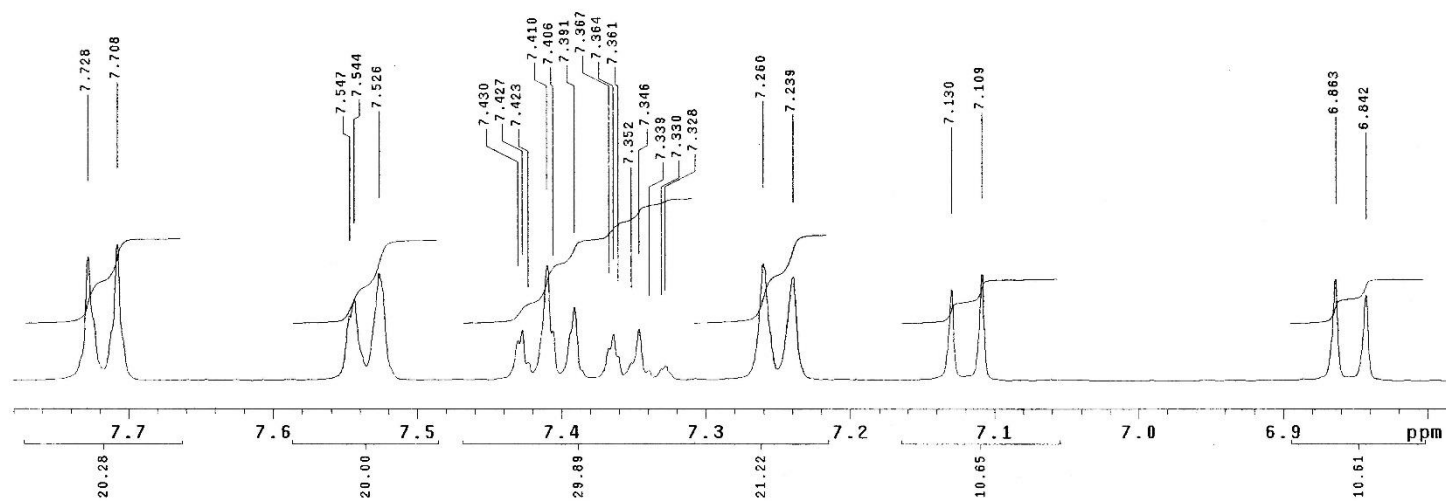

## Compound 6w

YLenon2w

Pulse Sequence: s2pu1  
UNITYplus-400 "unity400"  
Date: Nov 10 2015  
Solvent: CDCl<sub>3</sub>  
Ambient temperature  
Total 320 repetitions

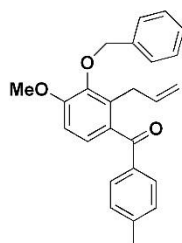

Compound **6w**

<sup>13</sup>C NMR (100 MHz, CDCl<sub>3</sub>) spectra

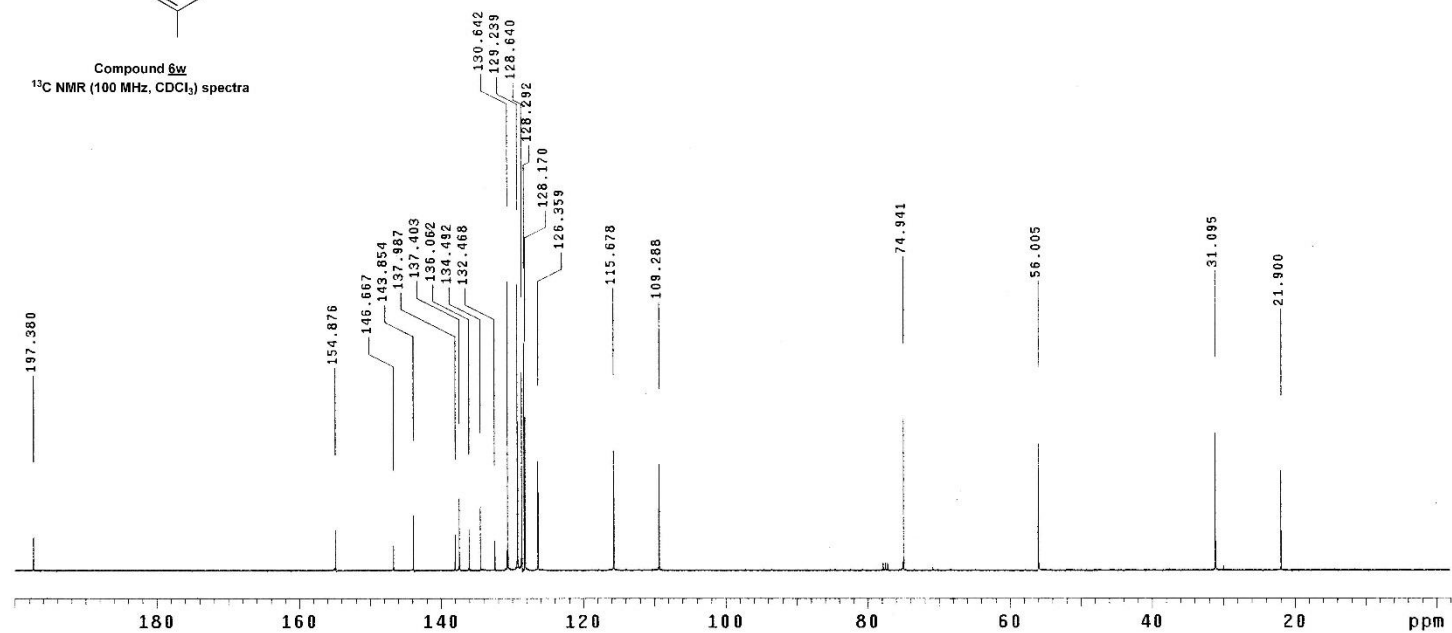

## Compound 6w

YLenon2w

Pulse Sequence: s2pu1  
UNITYplus-400 "unity400"  
Date: Nov 10 2015  
Solvent: CDCl<sub>3</sub>  
Ambient temperature  
Total 320 repetitions

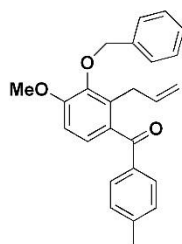

Compound 6w  
<sup>13</sup>C NMR (100 MHz, CDCl<sub>3</sub>) spectra

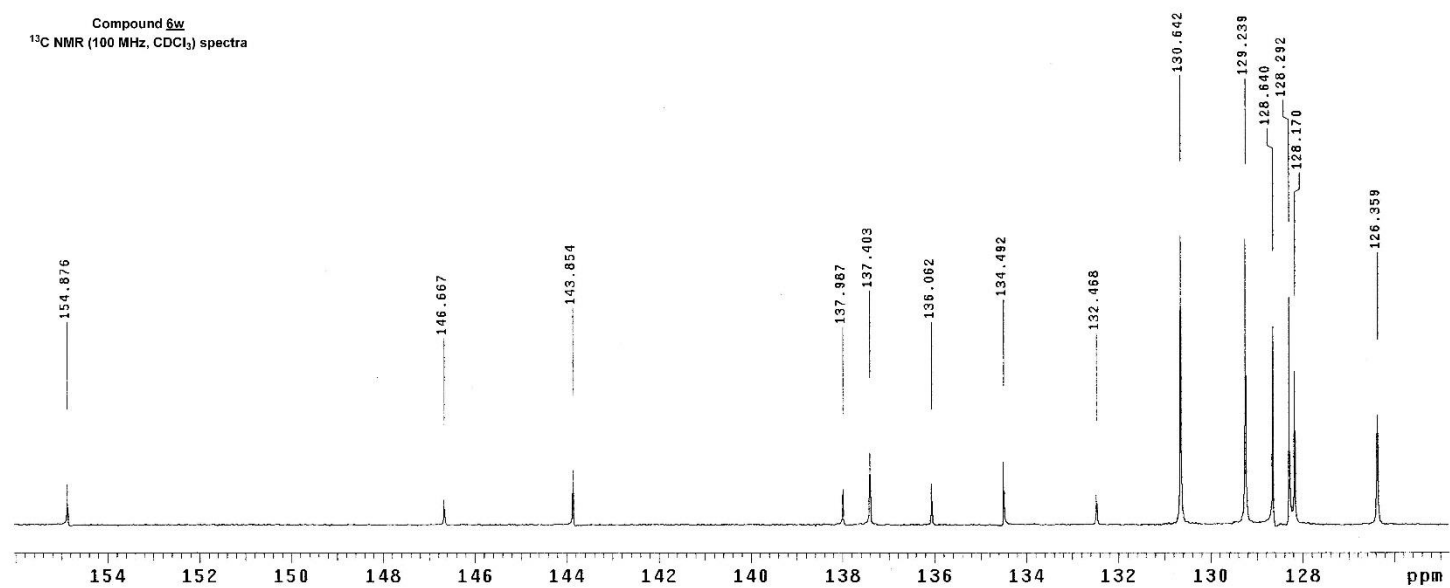

## Compound 6x

YLenon2x

Pulse Sequence: s2pul

UNITYplus-400 "unity400"

Date: Nov 4 2015

Solvent: CDCl<sub>3</sub>

Ambient temperature

Total 64 repetitions

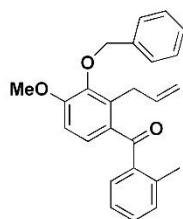

Compound 6x  
<sup>1</sup>H NMR (400 MHz, CDCl<sub>3</sub>) spectra

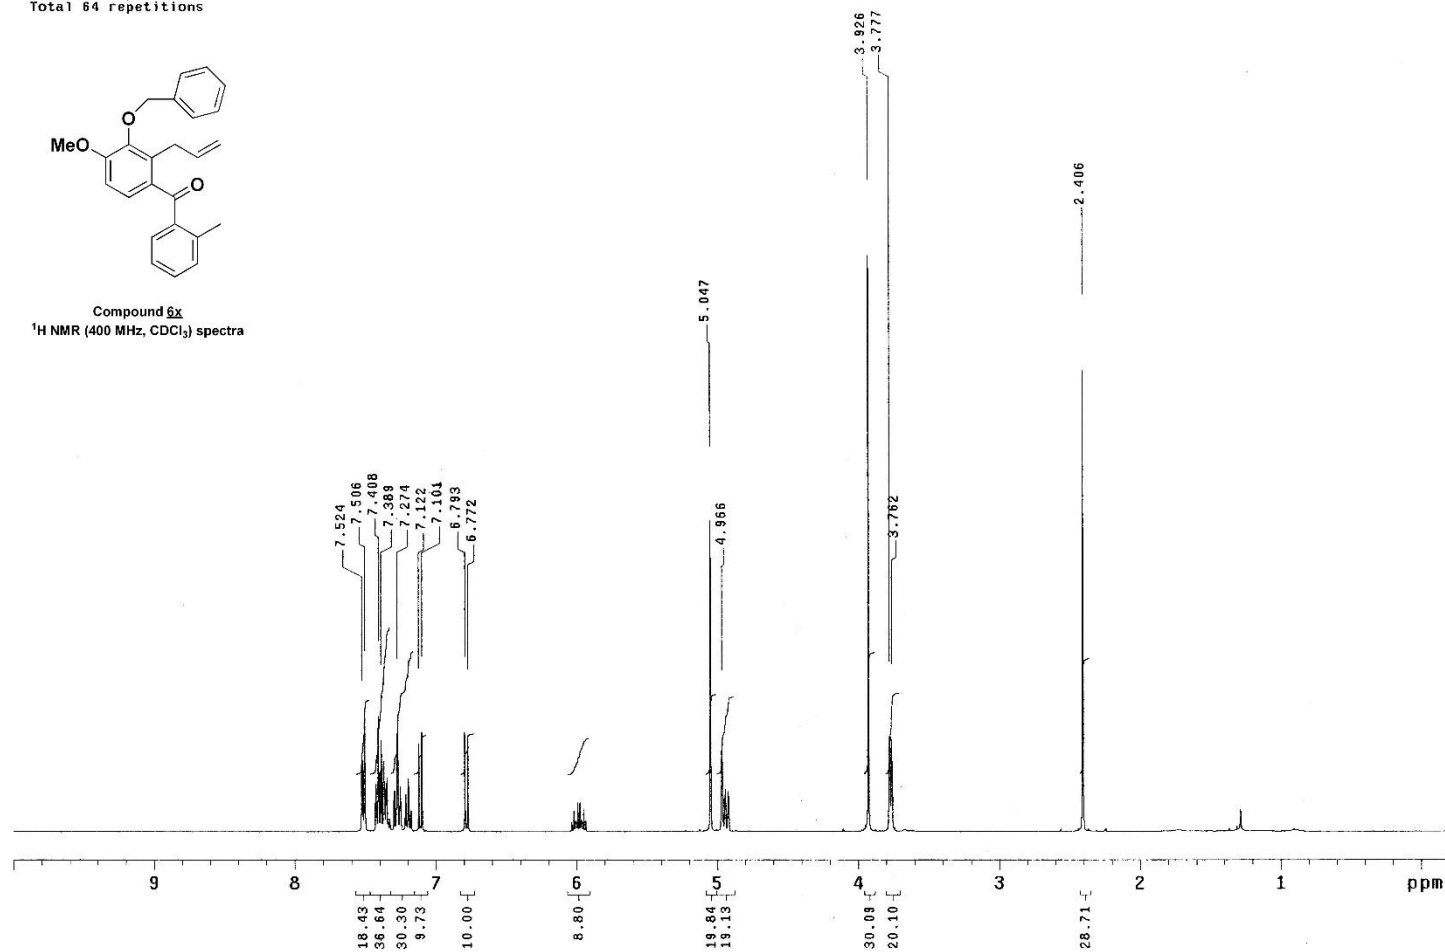

## Compound 6x

YLenon2x

Pulse Sequence: s2pul  
UNITYplus-400 "unity400"  
Date: Nov 4 2015  
Solvent: CDCl<sub>3</sub>  
Ambient temperature  
Total 64 repetitions

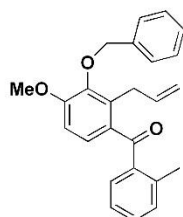

Compound 6x  
<sup>1</sup>H NMR (400 MHz, CDCl<sub>3</sub>) spectra

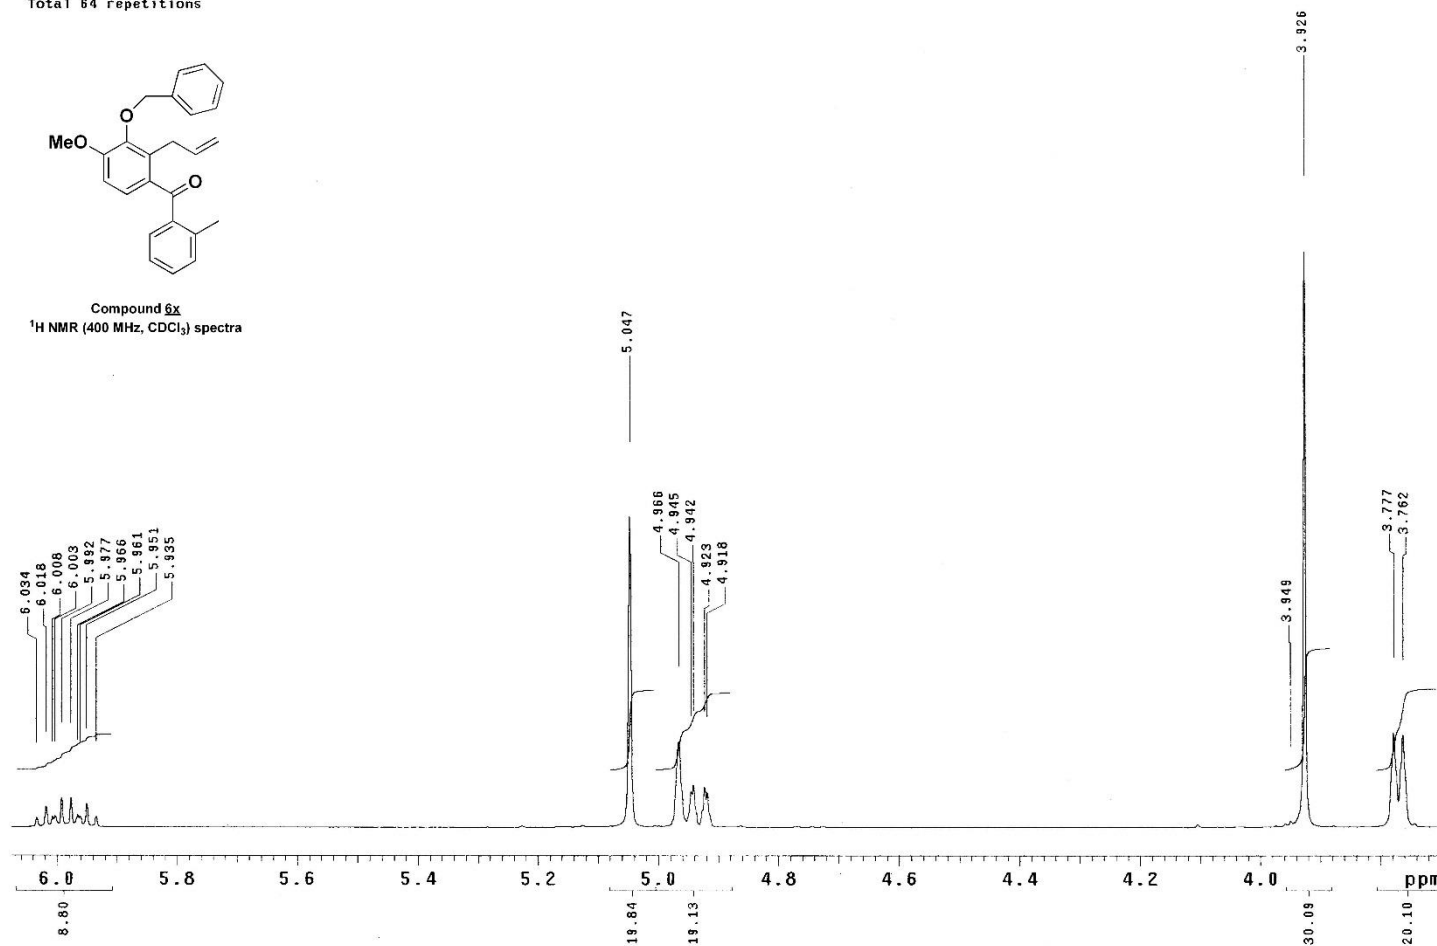



## Compound 6x

YLenon2x

Pulse Sequence: s2pul  
UNITYplus-400 "unity400"  
Date: Nov 4 2015  
Solvent: CDCl<sub>3</sub>  
Ambient temperature  
Total 64 repetitions



Compound 6x  
<sup>1</sup>H NMR (400 MHz, CDCl<sub>3</sub>) spectra

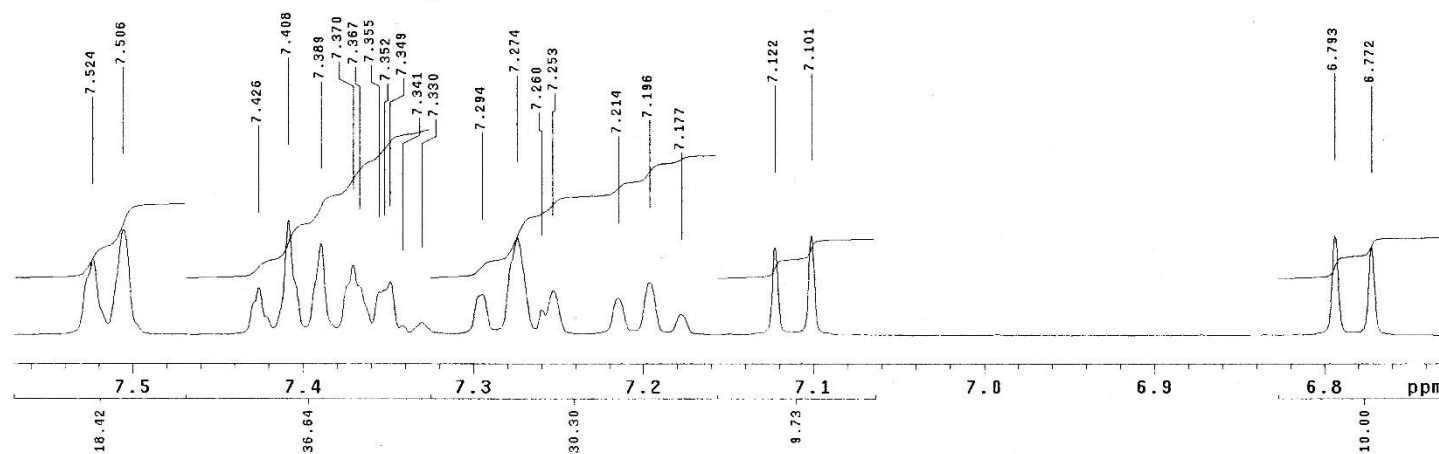

## Compound 6x

YLenon2x

Pulse Sequence: s2pul  
UNITYplus-400 "unity400"  
Date: Nov 4 2015  
Solvent: CDCl<sub>3</sub>  
Ambient temperature  
Total 1728 repetitions

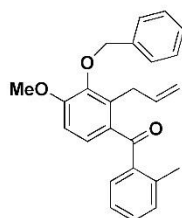

Compound 6x  
<sup>13</sup>C NMR (100 MHz, CDCl<sub>3</sub>) spectra

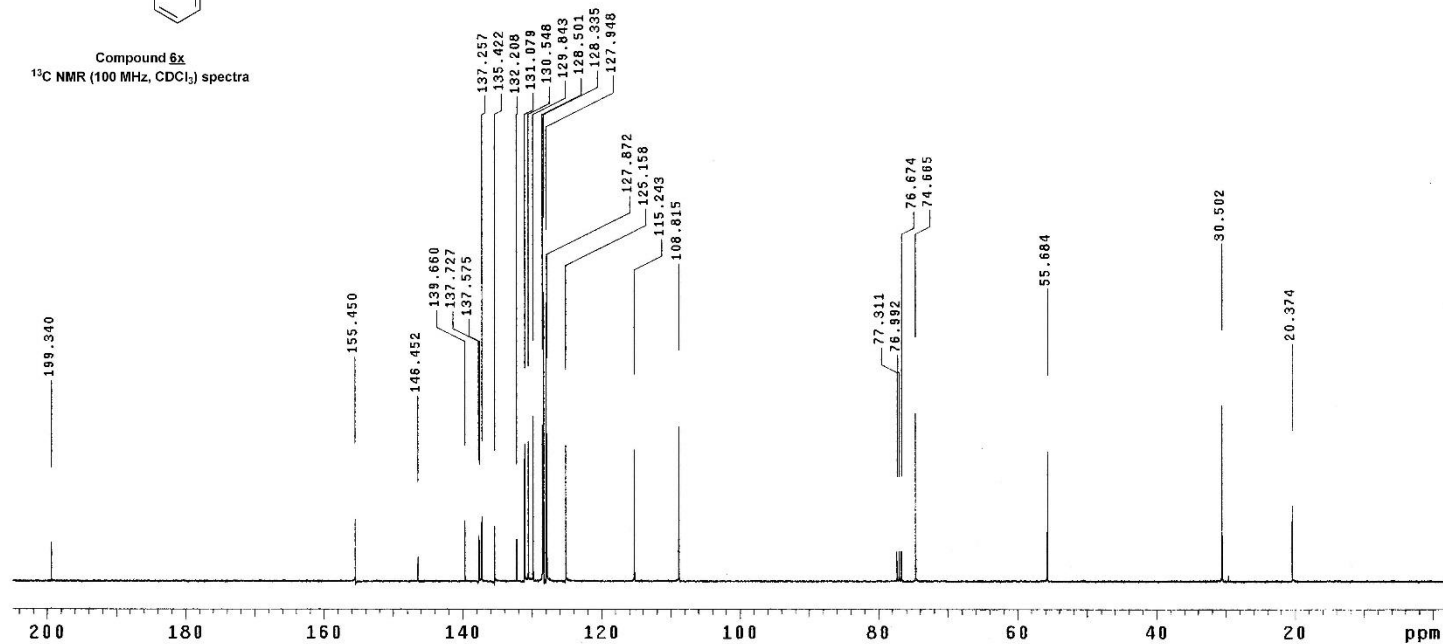

## Compound 6x

YLenon2x

Pulse Sequence: s2pu1  
UNITYplus-400 "unity400"  
Date: Nov 4 2015  
Solvent: CDCl<sub>3</sub>  
Ambient temperature  
Total 1728 repetitions

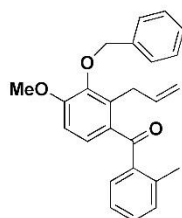

Compound 6x  
<sup>13</sup>C NMR (100 MHz, CDCl<sub>3</sub>) spectra

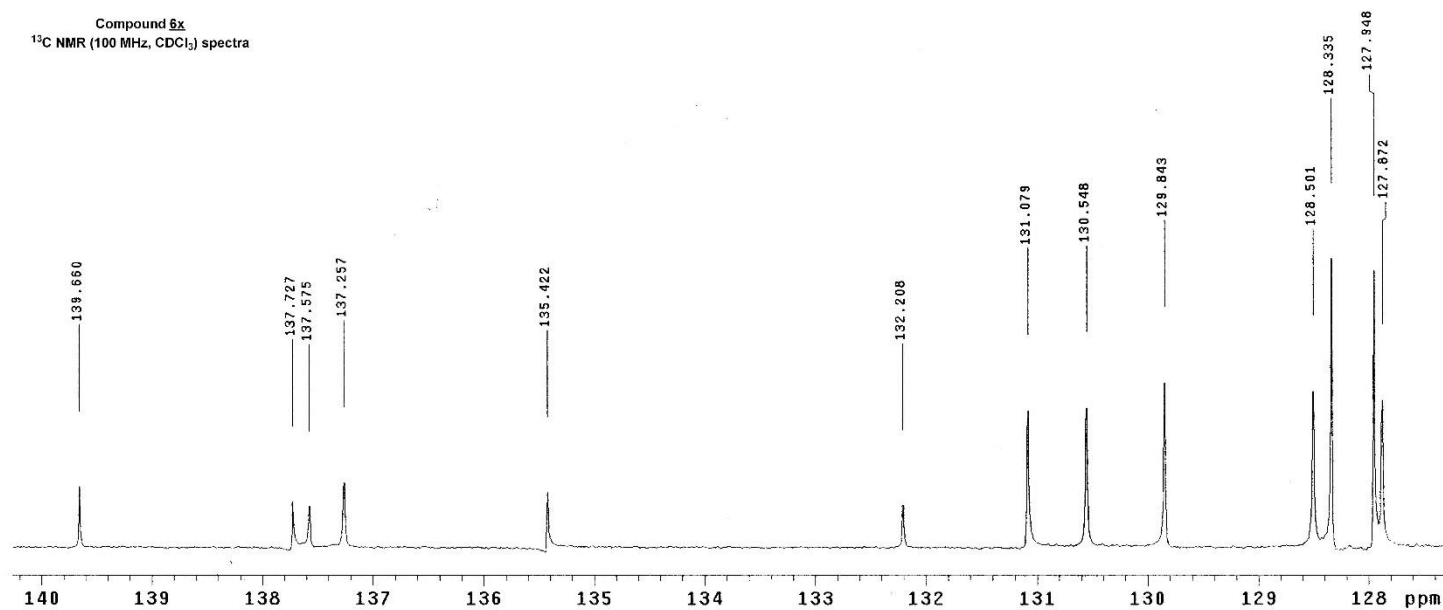

## Compound 6y

YL1041024

Pulse Sequence: s2pul  
UNITYplus-400 "unity400"  
Date: Nov 2 2015  
Solvent: CDCl<sub>3</sub>  
Ambient temperature  
Total 64 repetitions

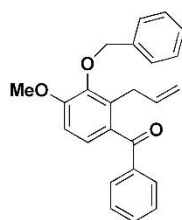

Compound 6y  
<sup>1</sup>H NMR (400 MHz, CDCl<sub>3</sub>) spectra

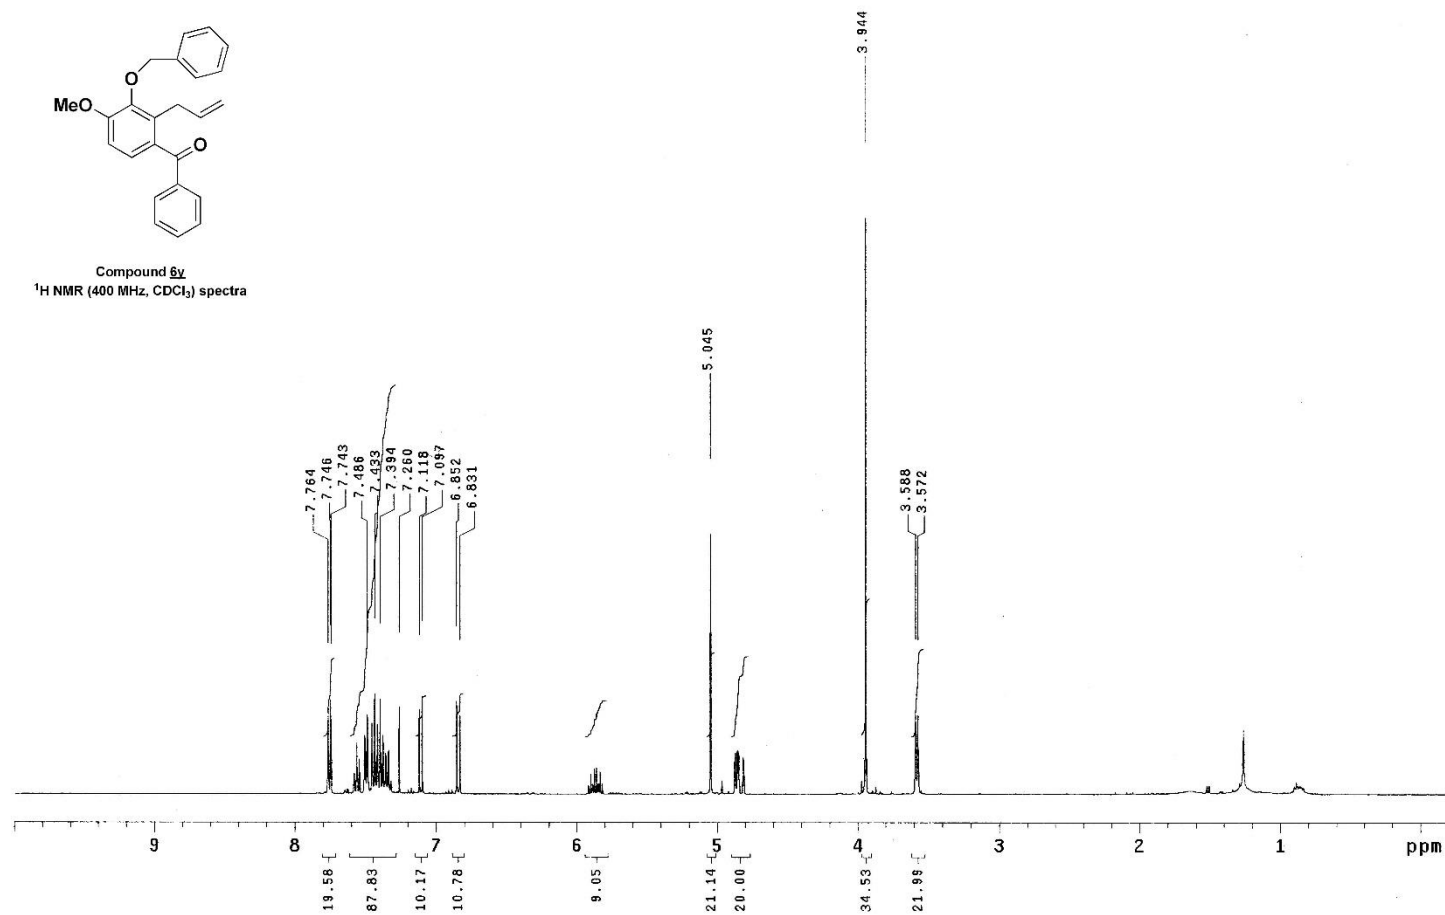

## Compound 6y

YL1041024

Pulse Sequence: s2pul  
UNITYplus-400 "unity400"  
Date: Nov 2 2015  
Solvent: CDCl<sub>3</sub>  
Ambient temperature  
Total 64 repetitions

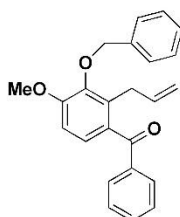

Compound 6y  
<sup>1</sup>H NMR (400 MHz, CDCl<sub>3</sub>) spectra

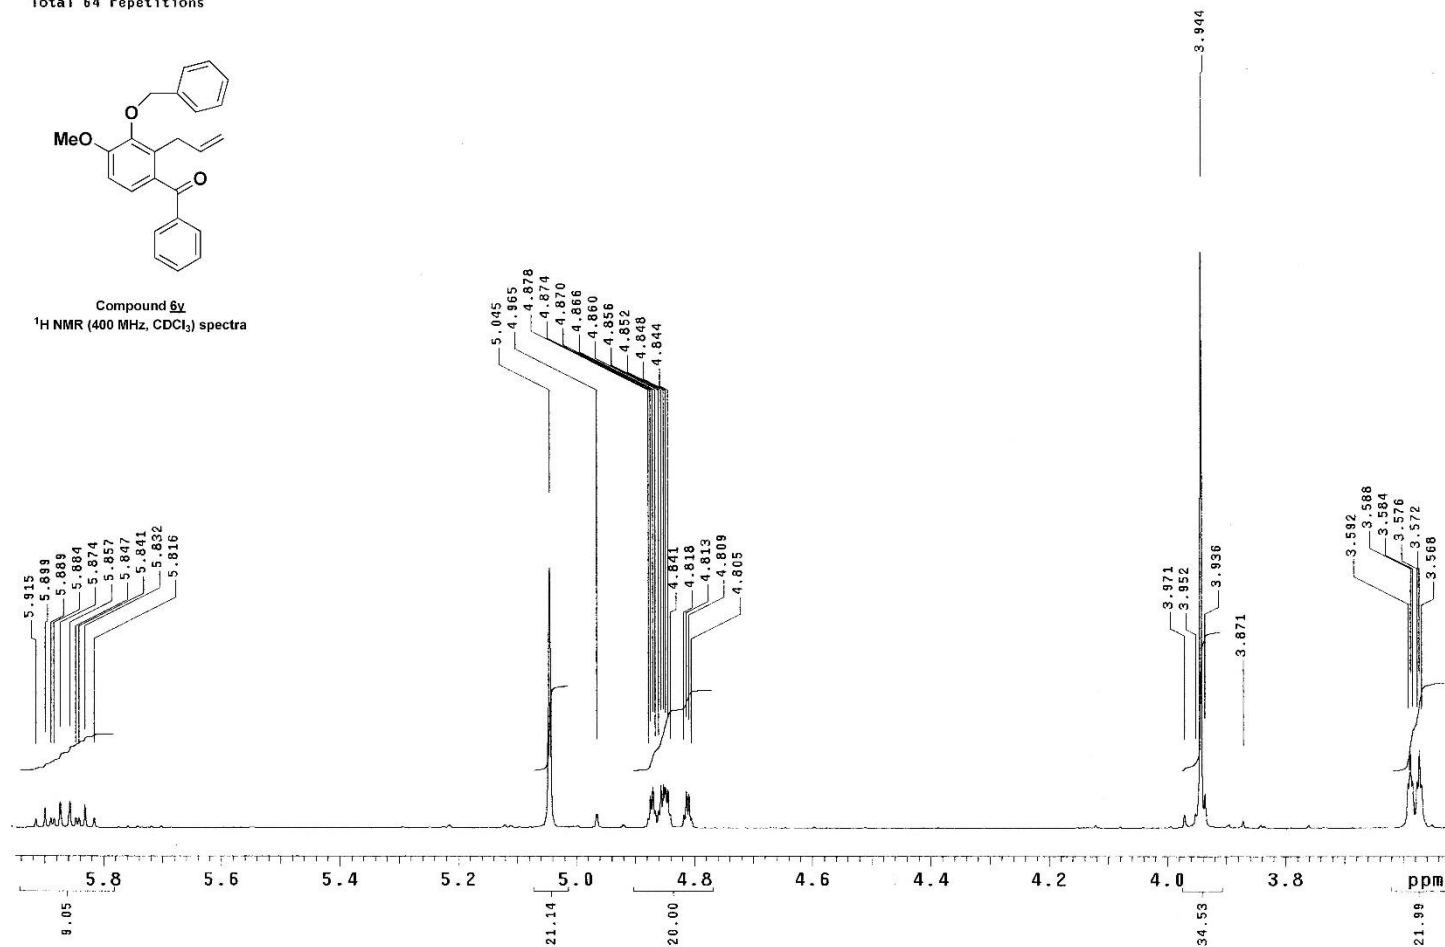

## Compound 6y

YL1041024

Pulse Sequence: s2pul  
UNITYplus-400 "unity400"  
Date: Nov 2 2015  
Solvent: CDCl<sub>3</sub>  
Ambient temperature  
Total 64 repetitions

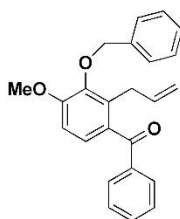

Compound **6y**  
<sup>1</sup>H NMR (400 MHz, CDCl<sub>3</sub>) spectra

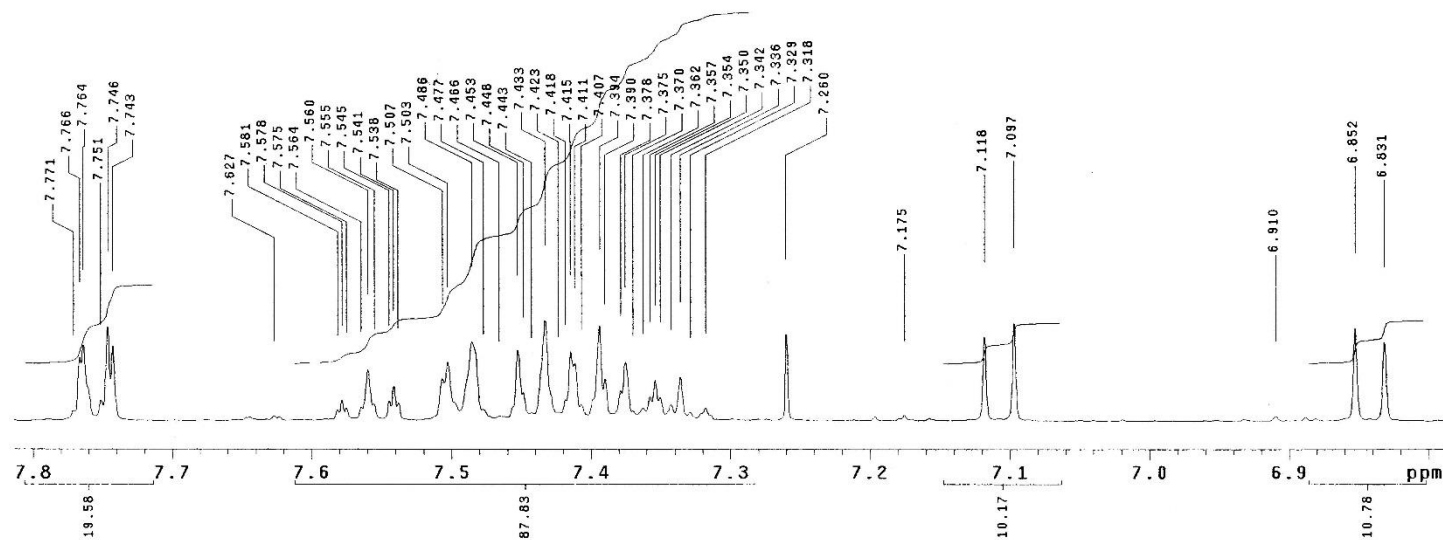

## Compound 6y

YL1041024

Pulse Sequence: s2pul  
UNITYplus-400 "unity400"  
Date: Nov 2 2015  
Solvent: CDCl<sub>3</sub>  
Ambient temperature  
Total 2176 repetitions

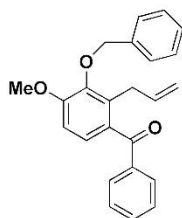

Compound 6y

<sup>13</sup>C NMR (100 MHz, CDCl<sub>3</sub>) spectra

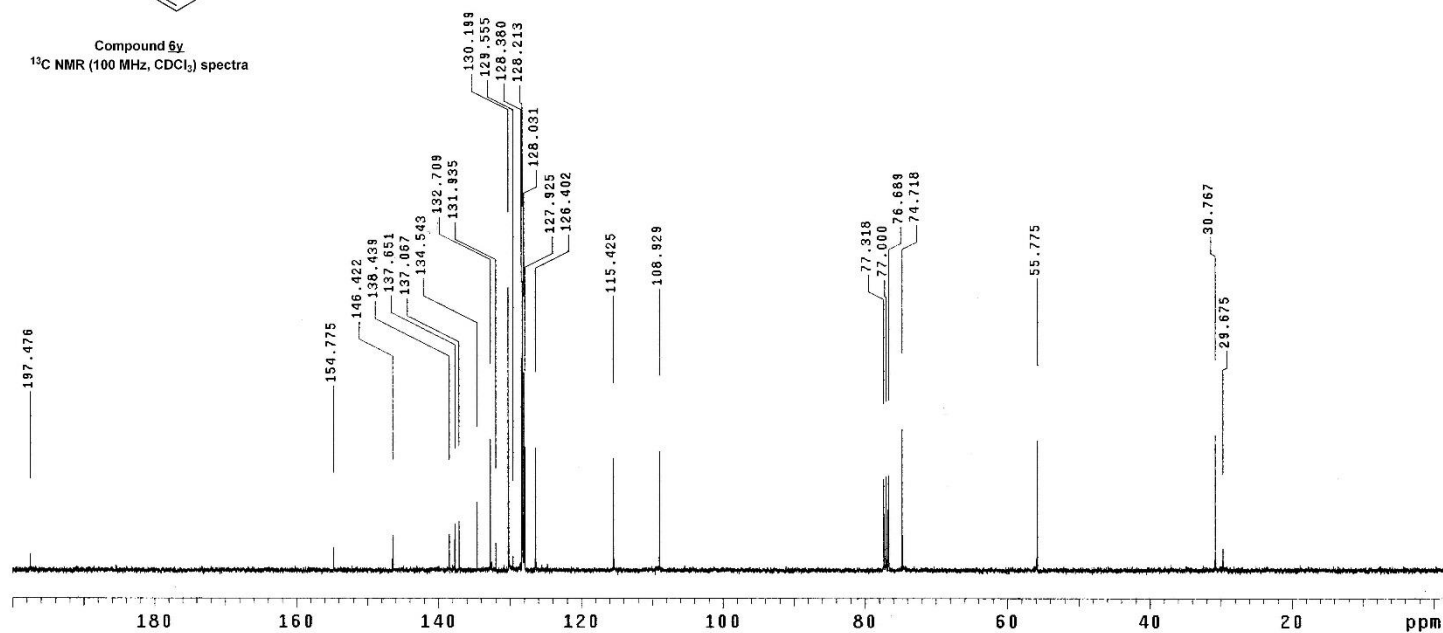

## Compound 6y

YL1041024

Pulse Sequence: s2pul  
UNITYplus-400 "unity400"  
Date: Nov 2 2015  
Solvent: CDCl<sub>3</sub>  
Ambient temperature  
Total 2176 repetitions

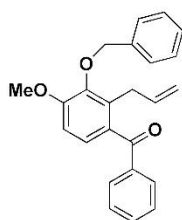

Compound 6y  
<sup>13</sup>C NMR (100 MHz, CDCl<sub>3</sub>) spectra

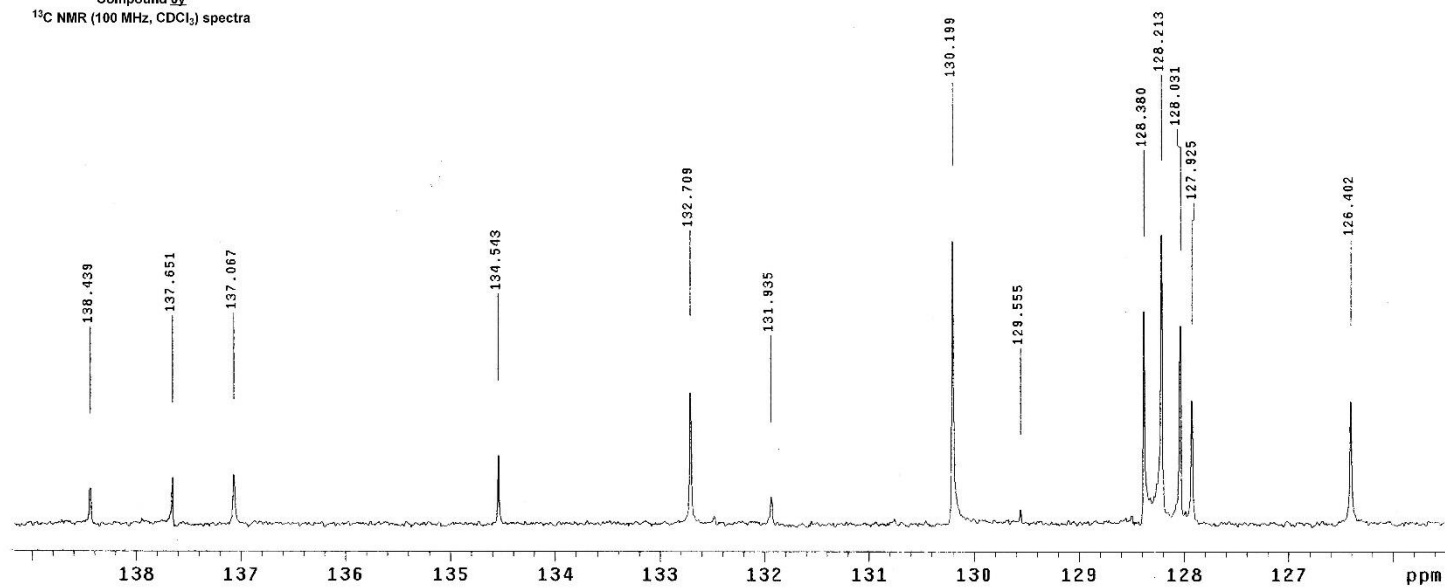



## Compound 6z

MH1001110  
Pulse Sequence: s2pu1  
UNITYplus-400 "unity400"  
Date: Nov 17 2011  
Solvent: CDCl<sub>3</sub>  
Ambient temperature  
Total 64 repetitions

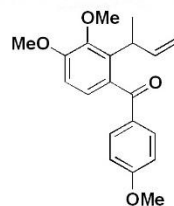

Compound 6z

<sup>1</sup>H NMR (400 MHz, CDCl<sub>3</sub>) spectra

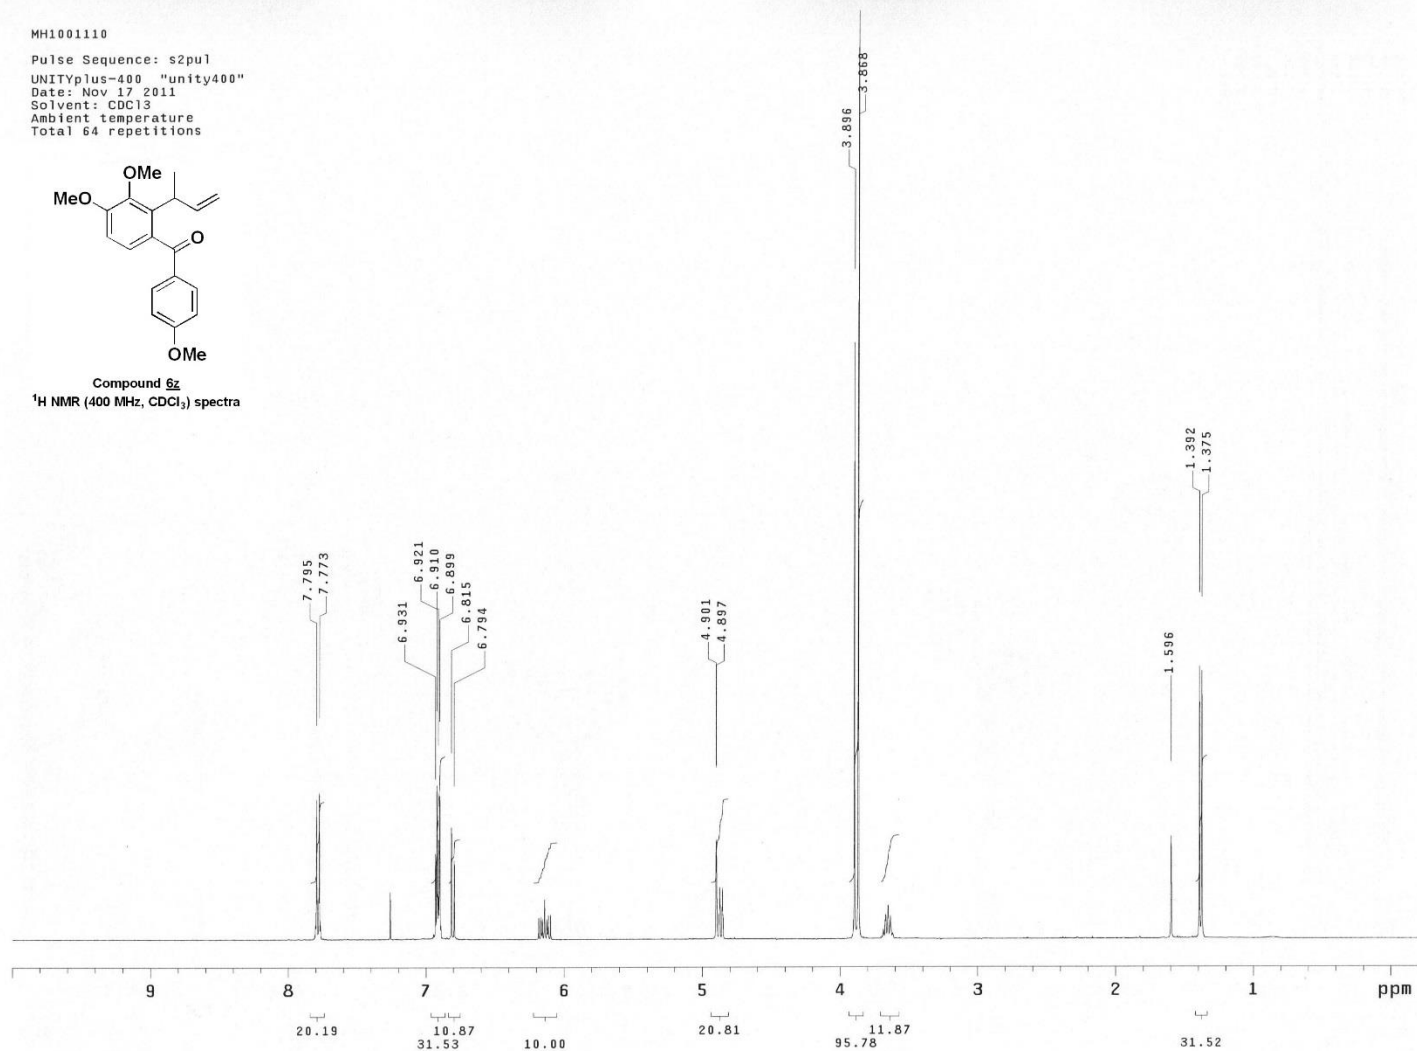

## Compound 6z

MH1001110

Pulse Sequence: s2pu1  
UNITYplus-400 "unity400"  
Date: Nov 17 2011  
Solvent: CDCl<sub>3</sub>  
Ambient temperature  
Total 2320 repetitions

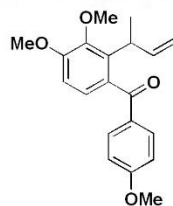

Compound 6z

<sup>13</sup>C NMR (100 MHz, CDCl<sub>3</sub>) spectra

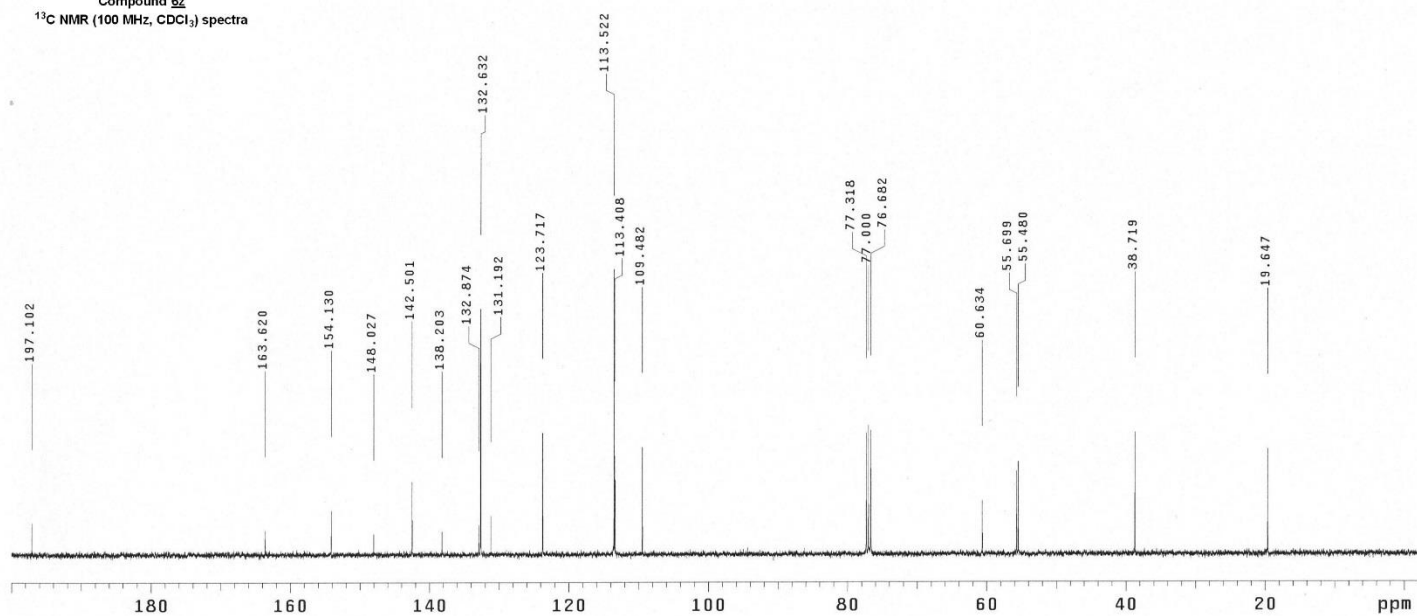

## Compound 6aa

YL1050423

Pulse Sequence: s2pu1  
UNITYplus-400 "unity400"  
Date: Apr 27 2016  
Solvent: CDCl<sub>3</sub>  
Ambient temperature  
Total 32 repetitions

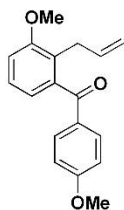

Compound 6aa  
<sup>1</sup>H NMR (400 MHz, CDCl<sub>3</sub>) spectra

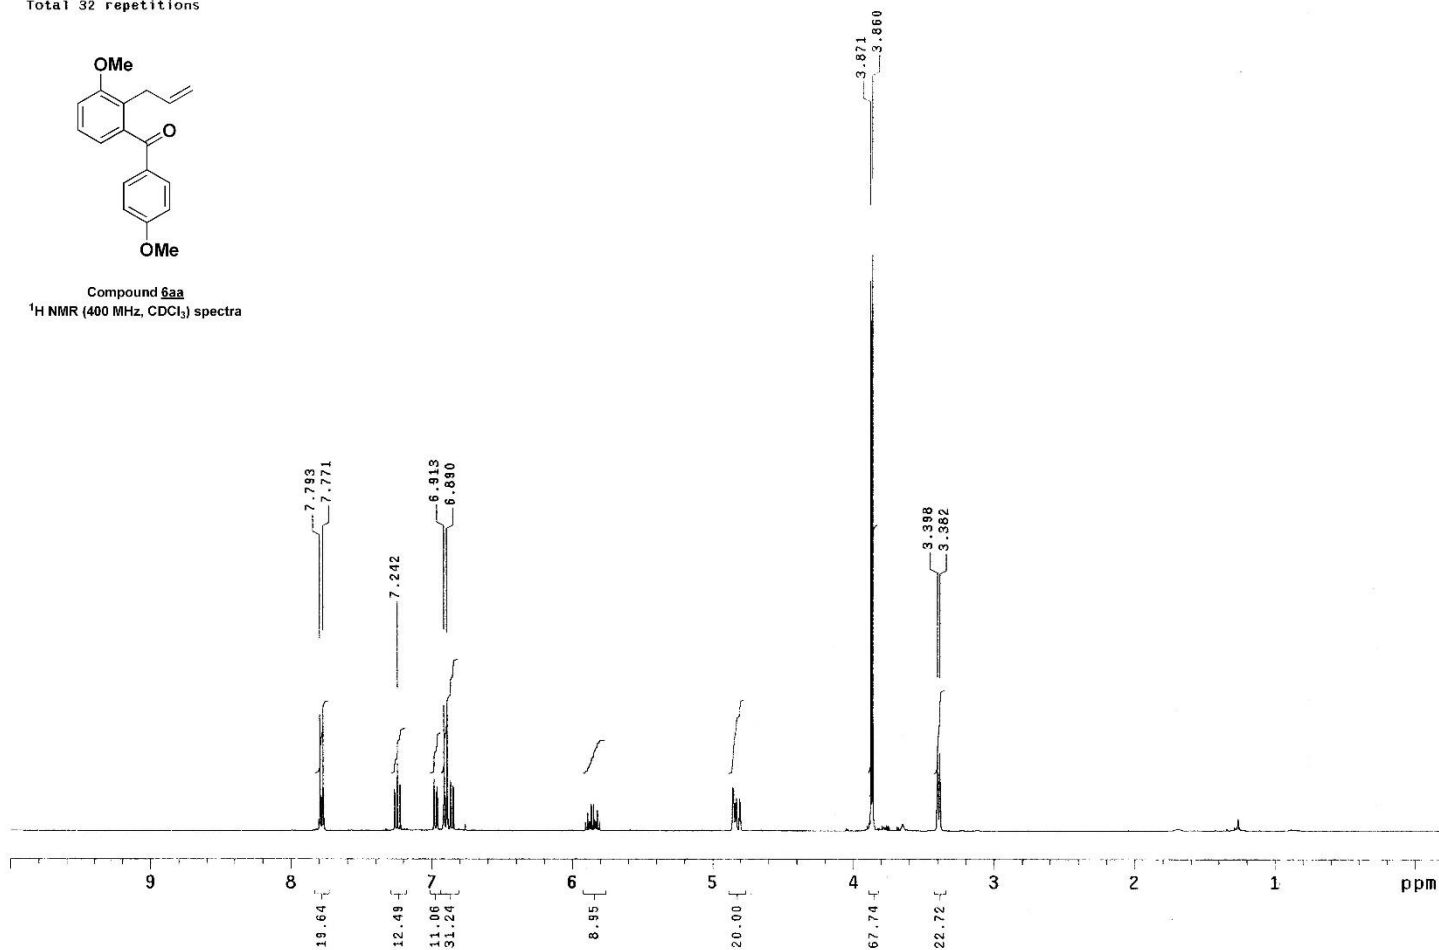

## Compound 6aa

YL1050423

Pulse Sequence: s2pu1

UNITYplus-400 "unity400"

Date: Apr 27 2016

Solvent: CDCl<sub>3</sub>

Ambient temperature

Total 32 repetitions

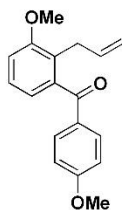

Compound 6aa

<sup>1</sup>H NMR (400 MHz, CDCl<sub>3</sub>) spectra

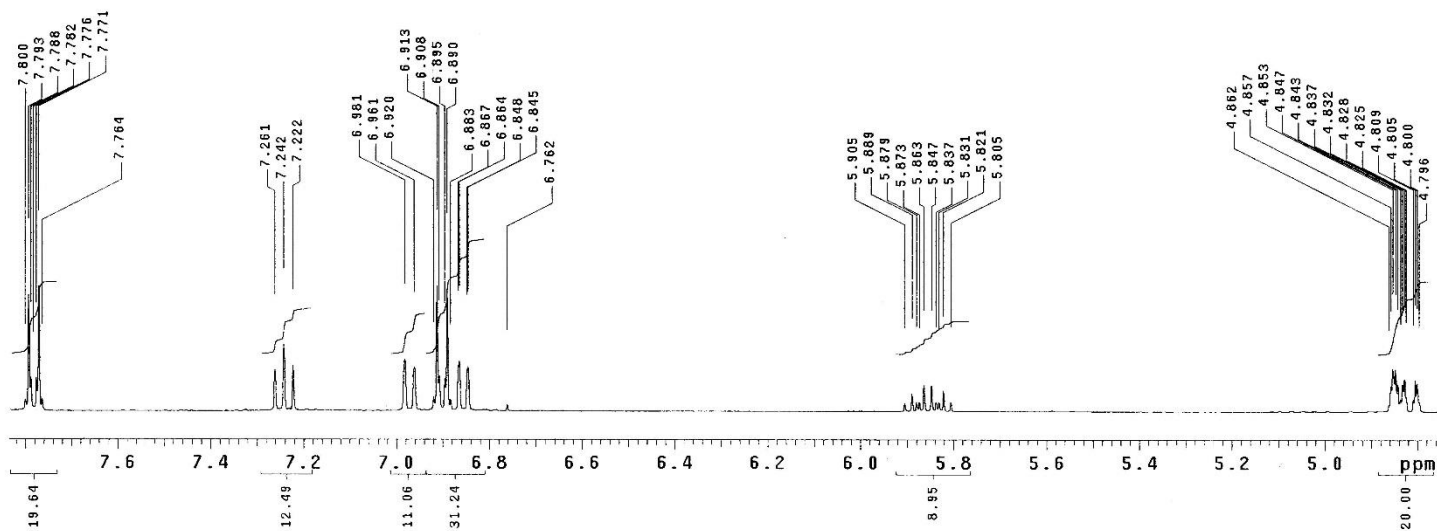

## Compound 6aa

YL1050423

Pulse Sequence: s2pul  
UNITYplus-400 "unity400"  
Date: Apr 27 2016  
Solvent: CDCl<sub>3</sub>  
Ambient temperature  
Total 544 repetitions

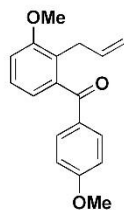

Compound 6aa

<sup>13</sup>C NMR (100 MHz, CDCl<sub>3</sub>) spectra

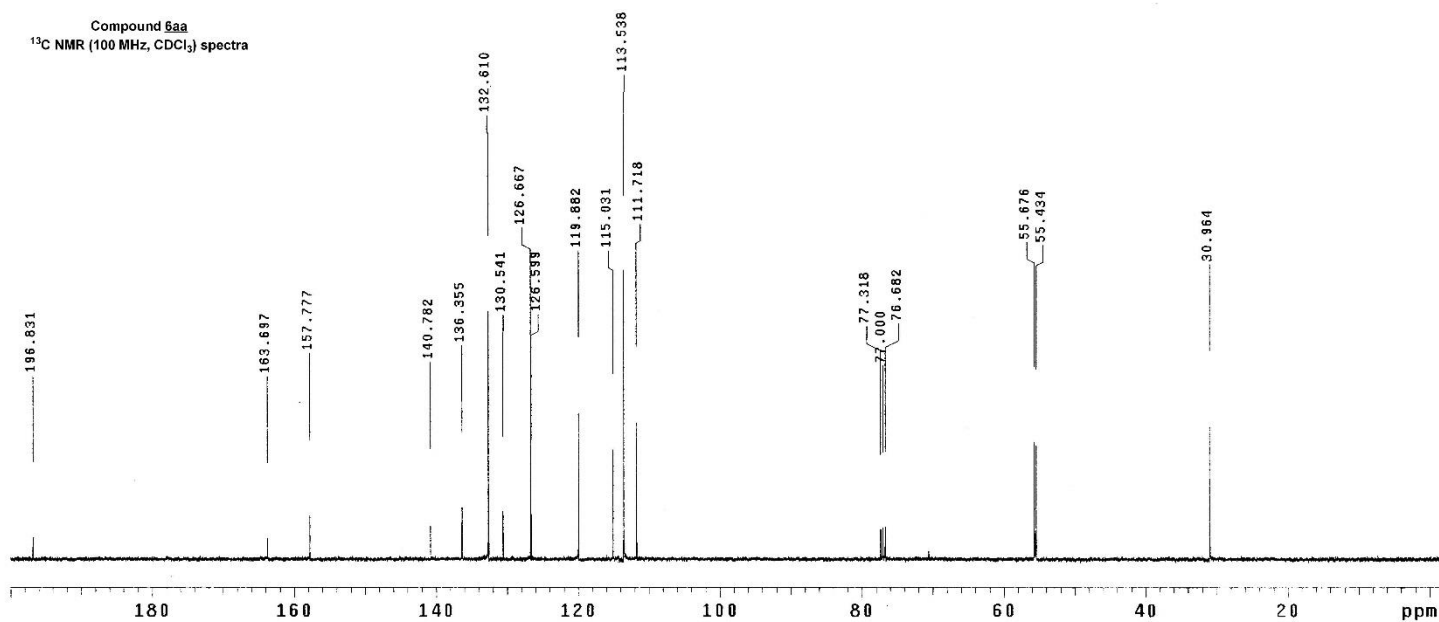

## Compound 8a

SK1010808-2

Pulse Sequence: s2pu1

UNITYplus-400 "unity400"

Date: Sep 12 2012

Solvent: CDCl<sub>3</sub>

Ambient temperature

Total 36 repetitions

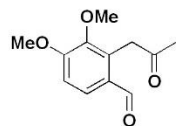

Compound 8a

<sup>1</sup>H NMR (400 MHz, CDCl<sub>3</sub>) spectra

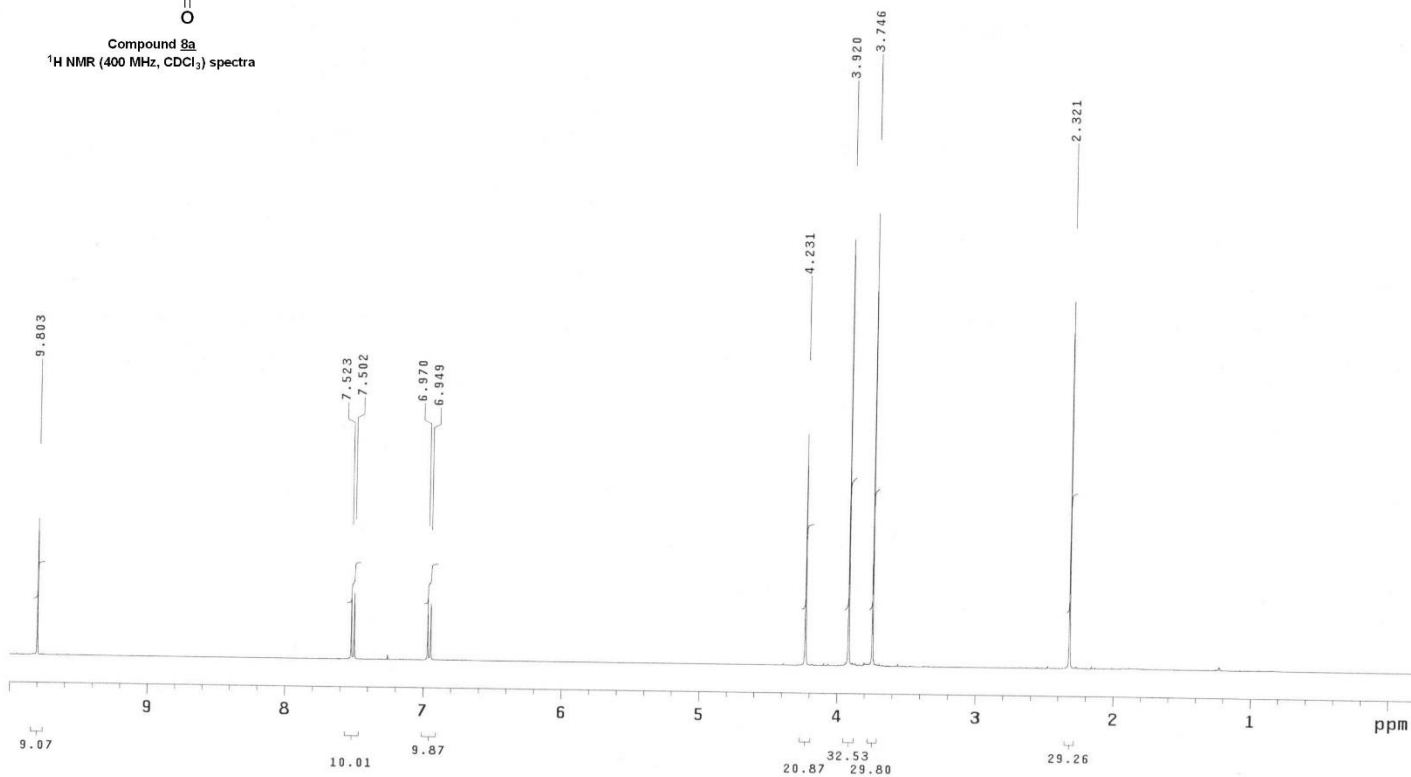

## Compound 8a

SK1010808-2

Pulse Sequence: s2pu1

UNITYplus-400 "unity400"

Date: Sep 12 2012

Solvent: CDCl<sub>3</sub>

Ambient temperature

Total 304 repetitions

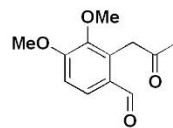

Compound 8a

<sup>13</sup>C NMR (100 MHz, CDCl<sub>3</sub>) spectra

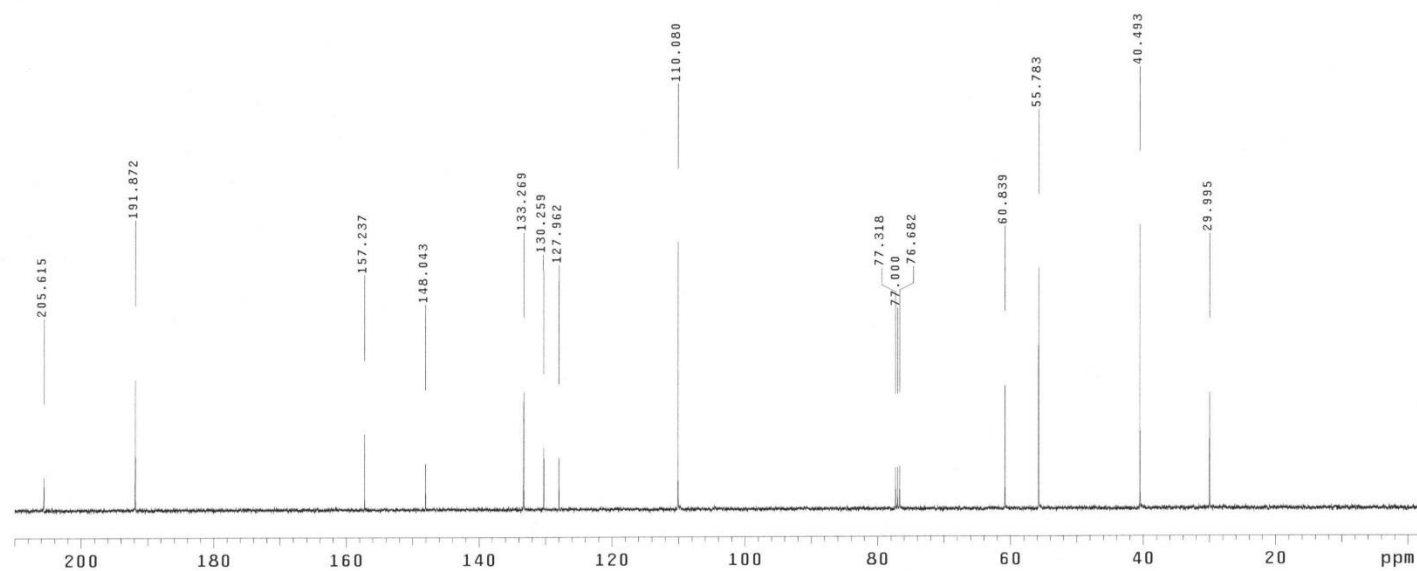

## Compound 8b

SKEWK

Pulse Sequence: s2pu1  
UNITYplus-400 "unity400"  
Date: Sep 17 2012  
Solvent: CDCl<sub>3</sub>  
Ambient temperature  
Total 64 repetitions

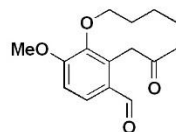

Compound 8b  
<sup>13</sup>C NMR (100 MHz, CDCl<sub>3</sub>) spectra

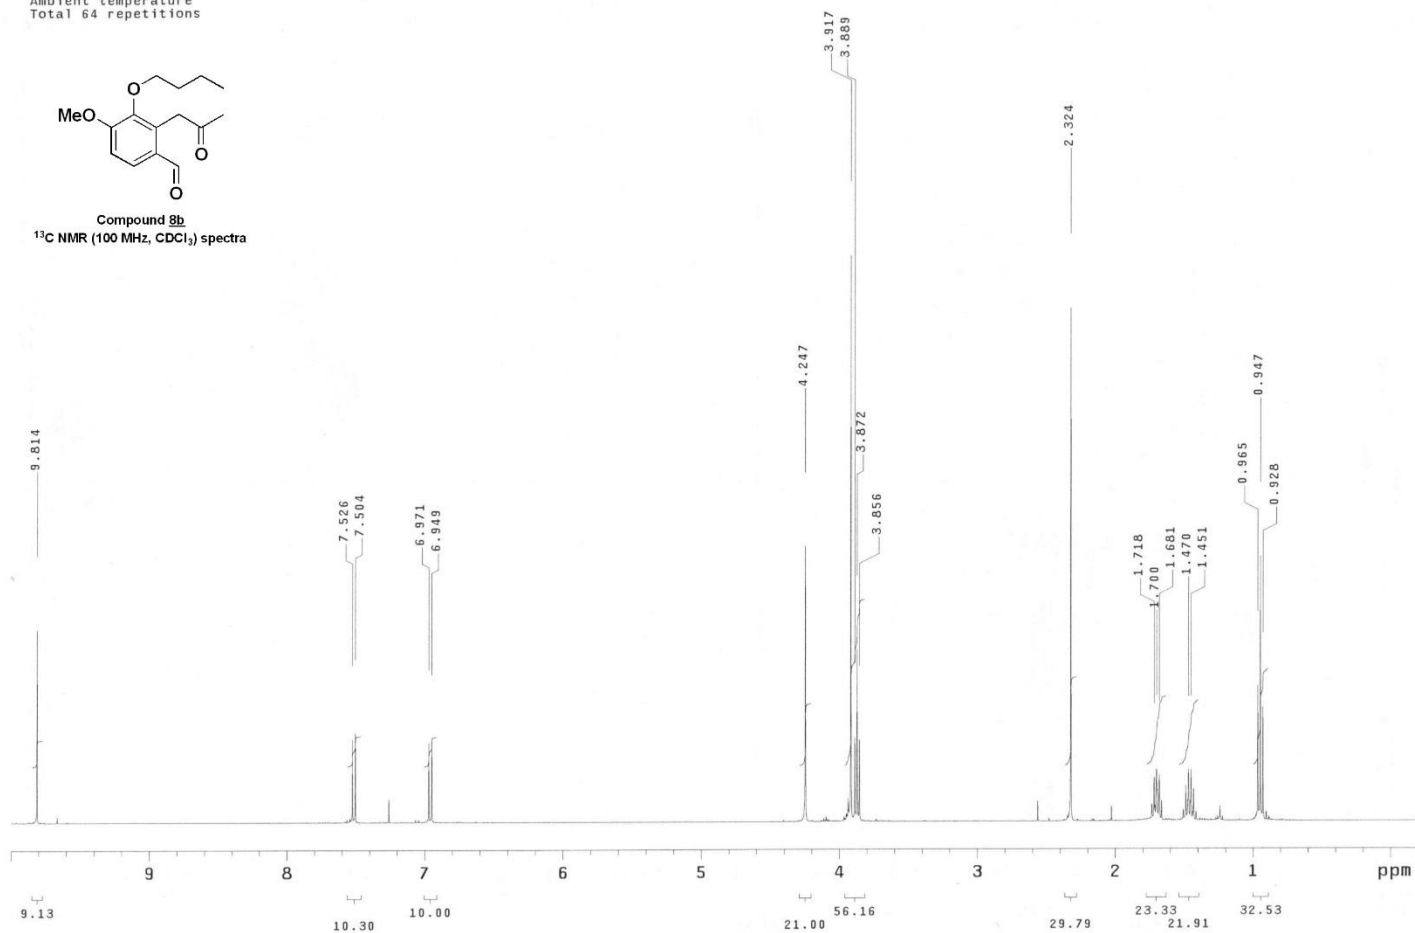



## Compound 8b

SKWVK  
Pulse Sequence: s2pul  
UNITYplus-400 "unity400"  
Date: Sep 17 2012  
Solvent: CDCl<sub>3</sub>  
Ambient temperature  
Total 1072 repetitions

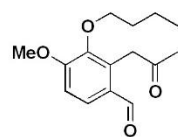

Compound 8b  
<sup>13</sup>C NMR (100 MHz, CDCl<sub>3</sub>) spectra

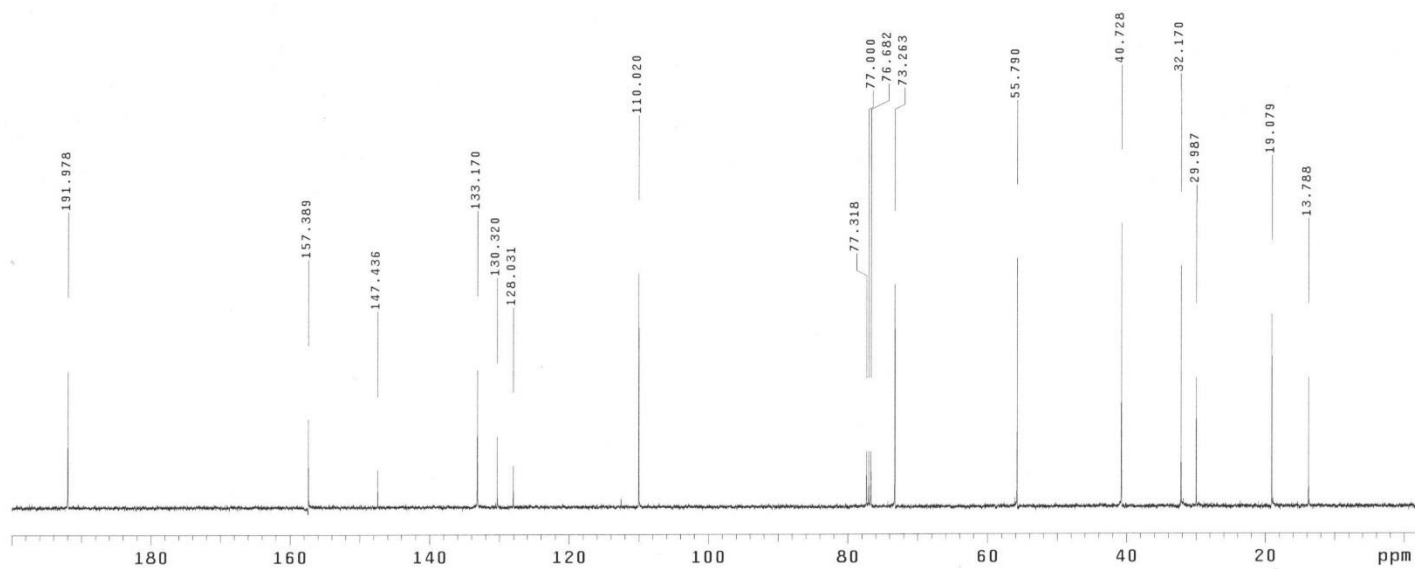

## Compound 9a

YR1040623

Pulse Sequence: s2pu1  
UNITYplus-400 "unity400"  
Date: Jun 25 2015  
Solvent: CDCl<sub>3</sub>  
Ambient temperature  
Total 32 repetitions

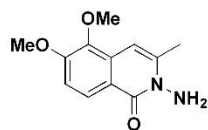

Compound 9a  
<sup>1</sup>H NMR (400 MHz, CDCl<sub>3</sub>) spectra

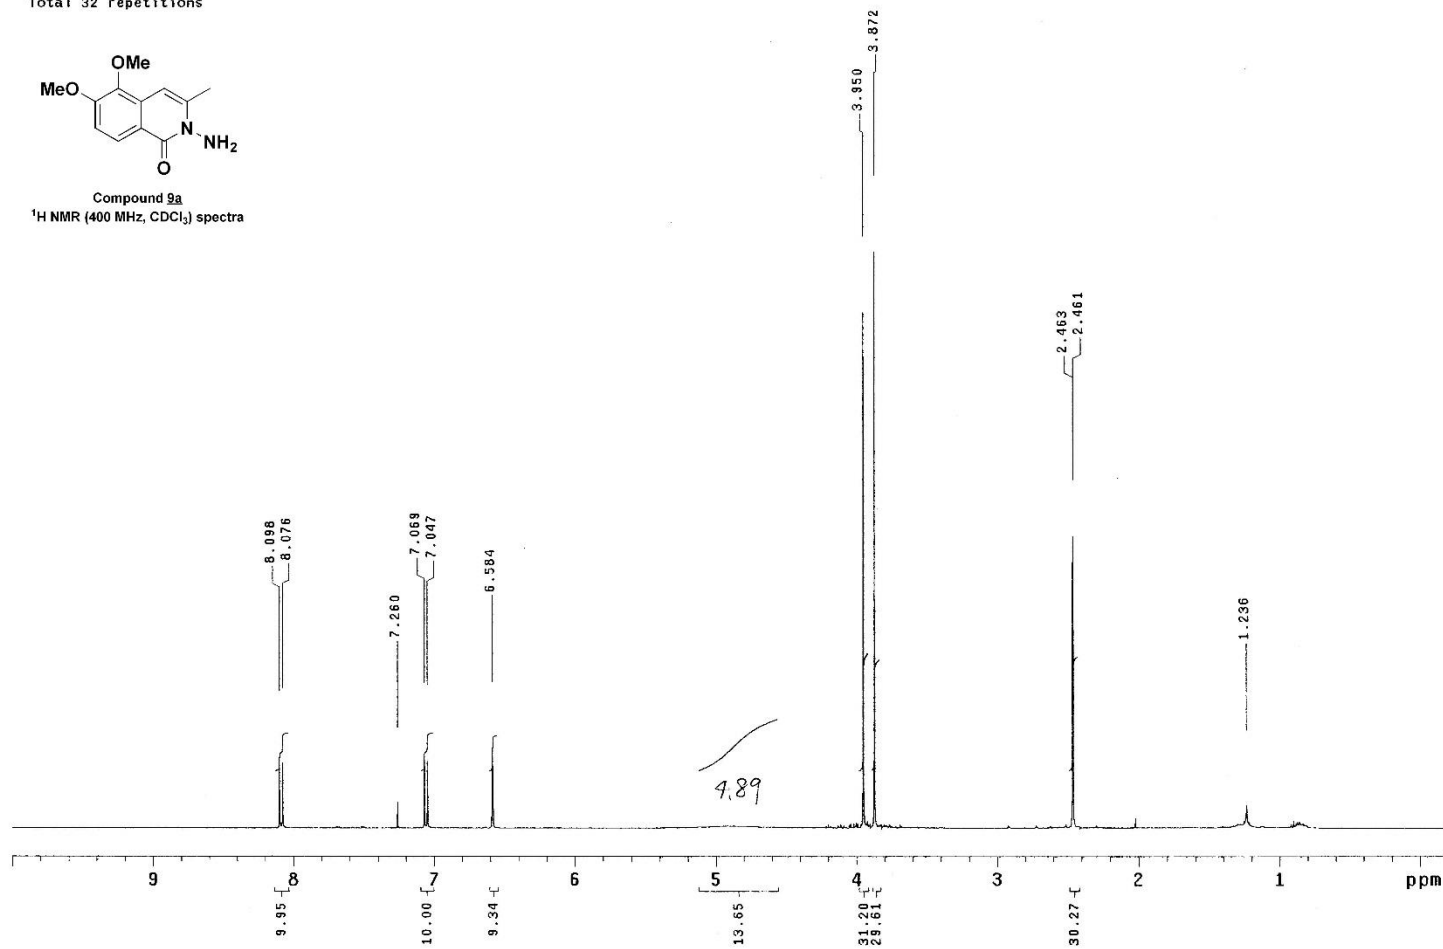

## Compound 9a

YR1040623

Pulse Sequence: s2pu1

UNITYplus-400 "unity400"

Date: Jun 25 2015

Solvent: CDCl<sub>3</sub>

Ambient temperature

Total 6400 repetitions

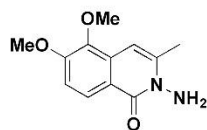

Compound 9a

<sup>13</sup>C NMR (100 MHz, CDCl<sub>3</sub>) spectra

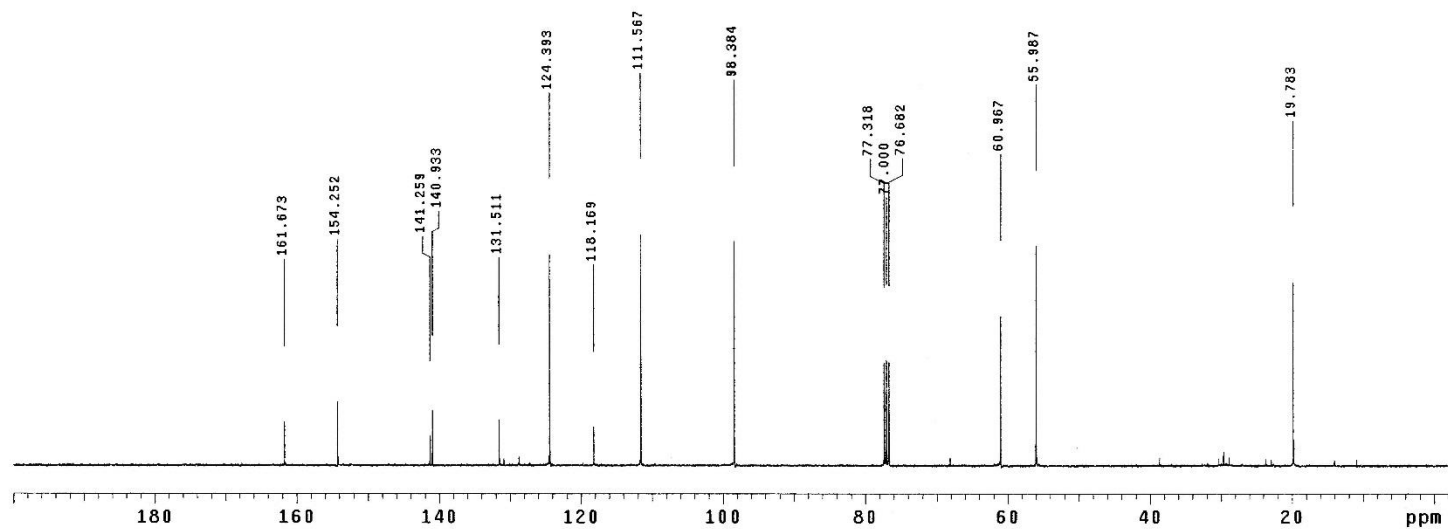

## Compound 9b

YL1040907

Pulse Sequence: s2pul  
UNITYplus-400 "unity400"  
Date: Sep 8 2015  
Solvent: CDCl<sub>3</sub>  
Ambient temperature  
Total 64 repetitions

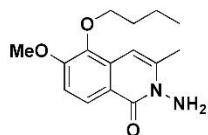

Compound 9b

<sup>1</sup>H NMR (400 MHz, CDCl<sub>3</sub>) spectra

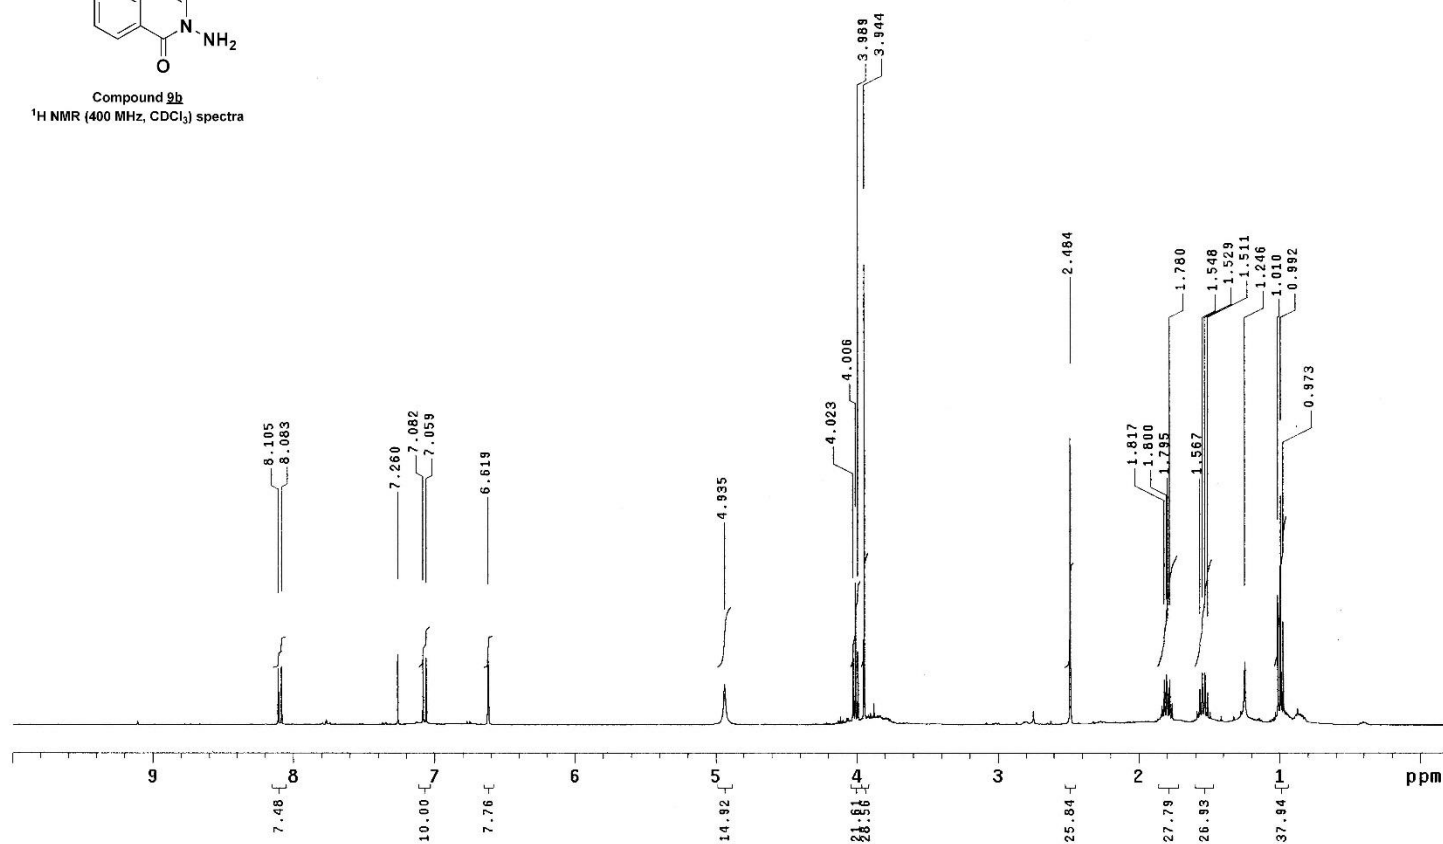

## Compound 9b

YL1040907

Pulse Sequence: s2pul

UNITYplus-400 "unity400"

Date: Sep 8 2015

Solvent: CDCl<sub>3</sub>

Ambient temperature

Total 64 repetitions

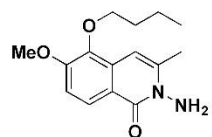

Compound **9b**  
<sup>1</sup>H NMR (400 MHz, CDCl<sub>3</sub>) spectra

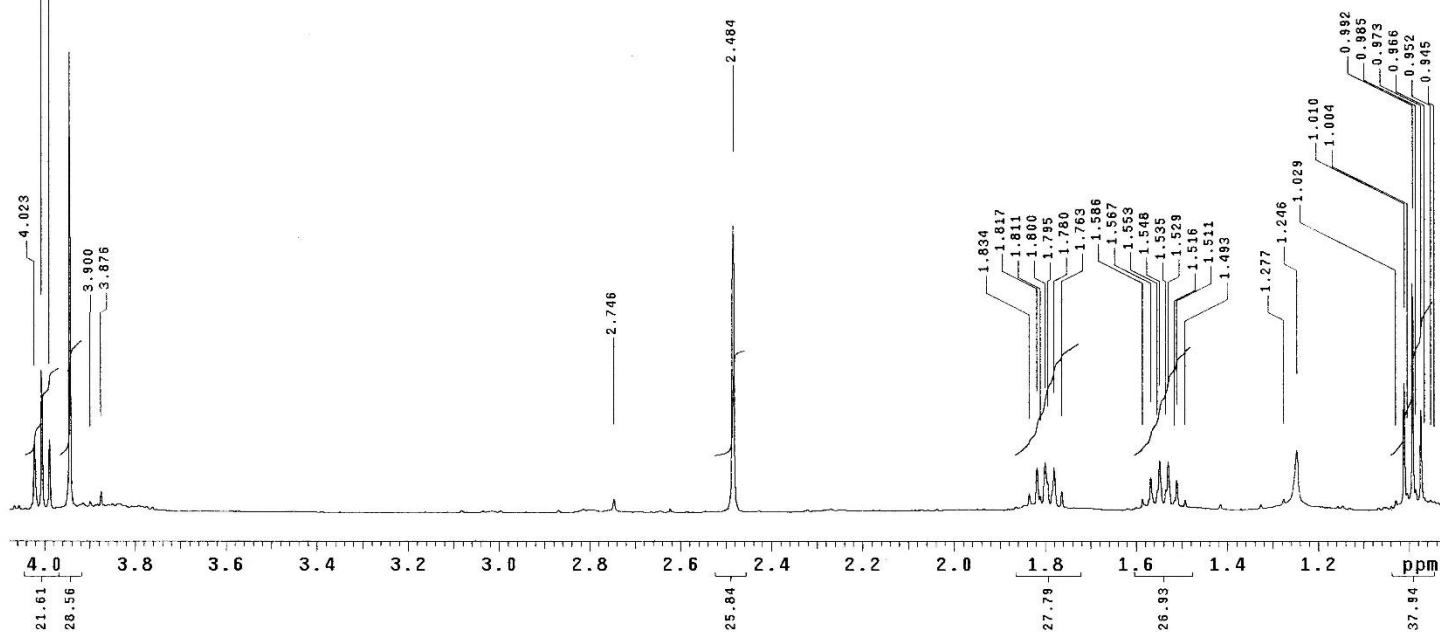

## Compound 9b

YL1040907

Pulse Sequence: s2pu1  
UNITYplus-400 "unity400"  
Date: Sep 8 2015  
Solvent: CDCl<sub>3</sub>  
Ambient temperature  
Total 11728 repetitions

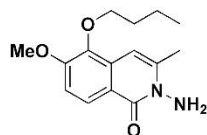

Compound 9b

<sup>13</sup>C NMR (100 MHz, CDCl<sub>3</sub>) spectra

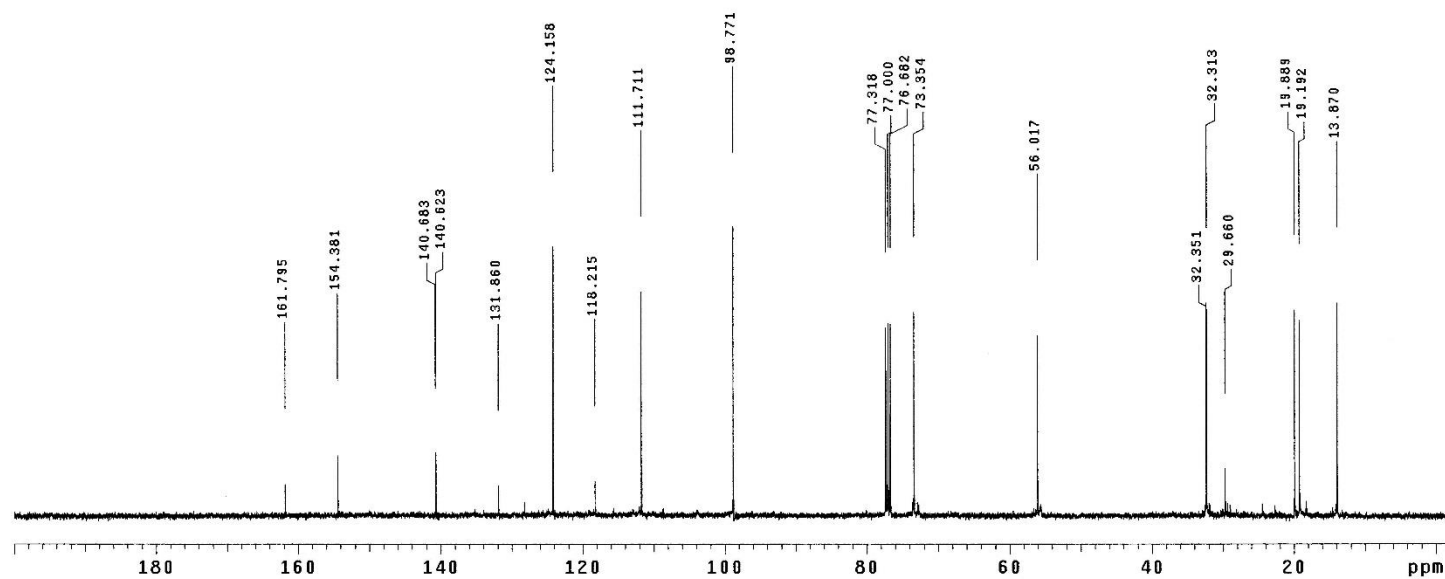

## Compound 9b

YL1040907

Pulse Sequence: s2pu1  
UNITYplus-400 "unity400"  
Date: Sep 8 2015  
Solvent: CDCl<sub>3</sub>  
Ambient temperature  
Total 11728 repetitions

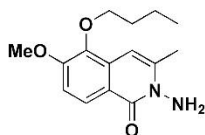

Compound 9b

<sup>13</sup>C NMR (100 MHz, CDCl<sub>3</sub>) spectra

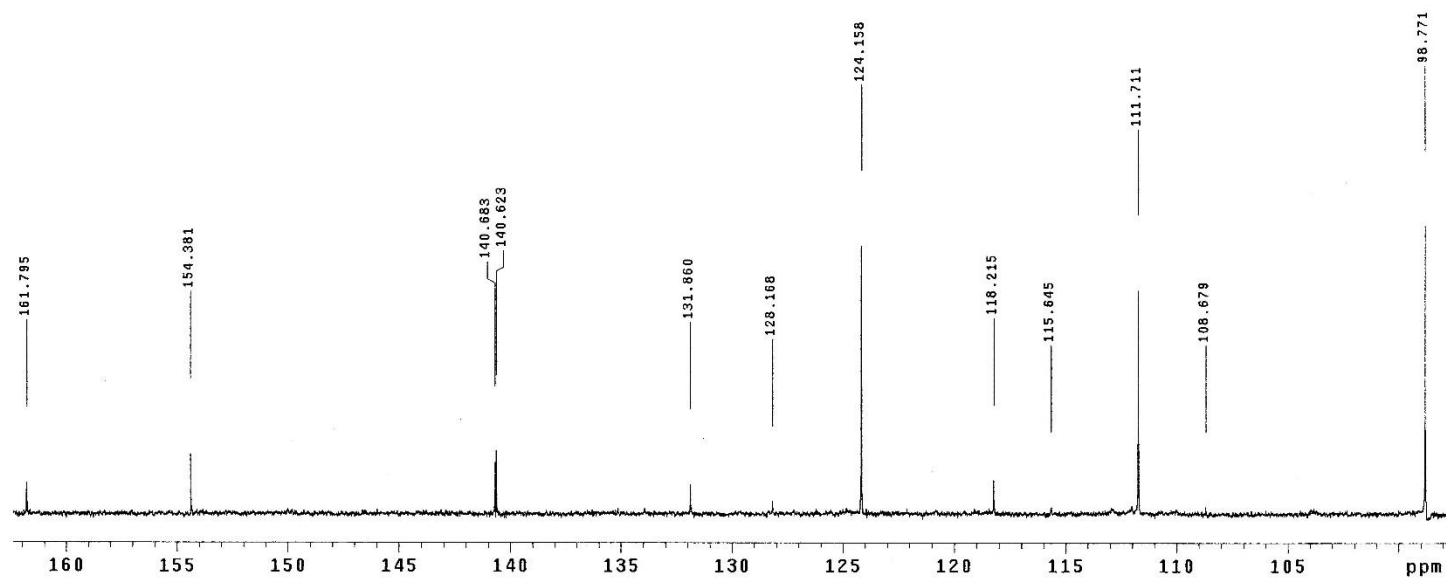

## Compound 9c

YL1040912

Pulse Sequence: s2pu1

UNITYplus-400 "unity400"

Date: Sep 14 2015

Solvent: CDCl<sub>3</sub>

Ambient temperature

Total 64 repetitions

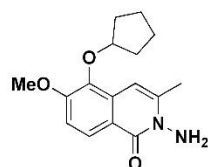

Compound 9c

<sup>1</sup>H NMR (400 MHz, CDCl<sub>3</sub>) spectra

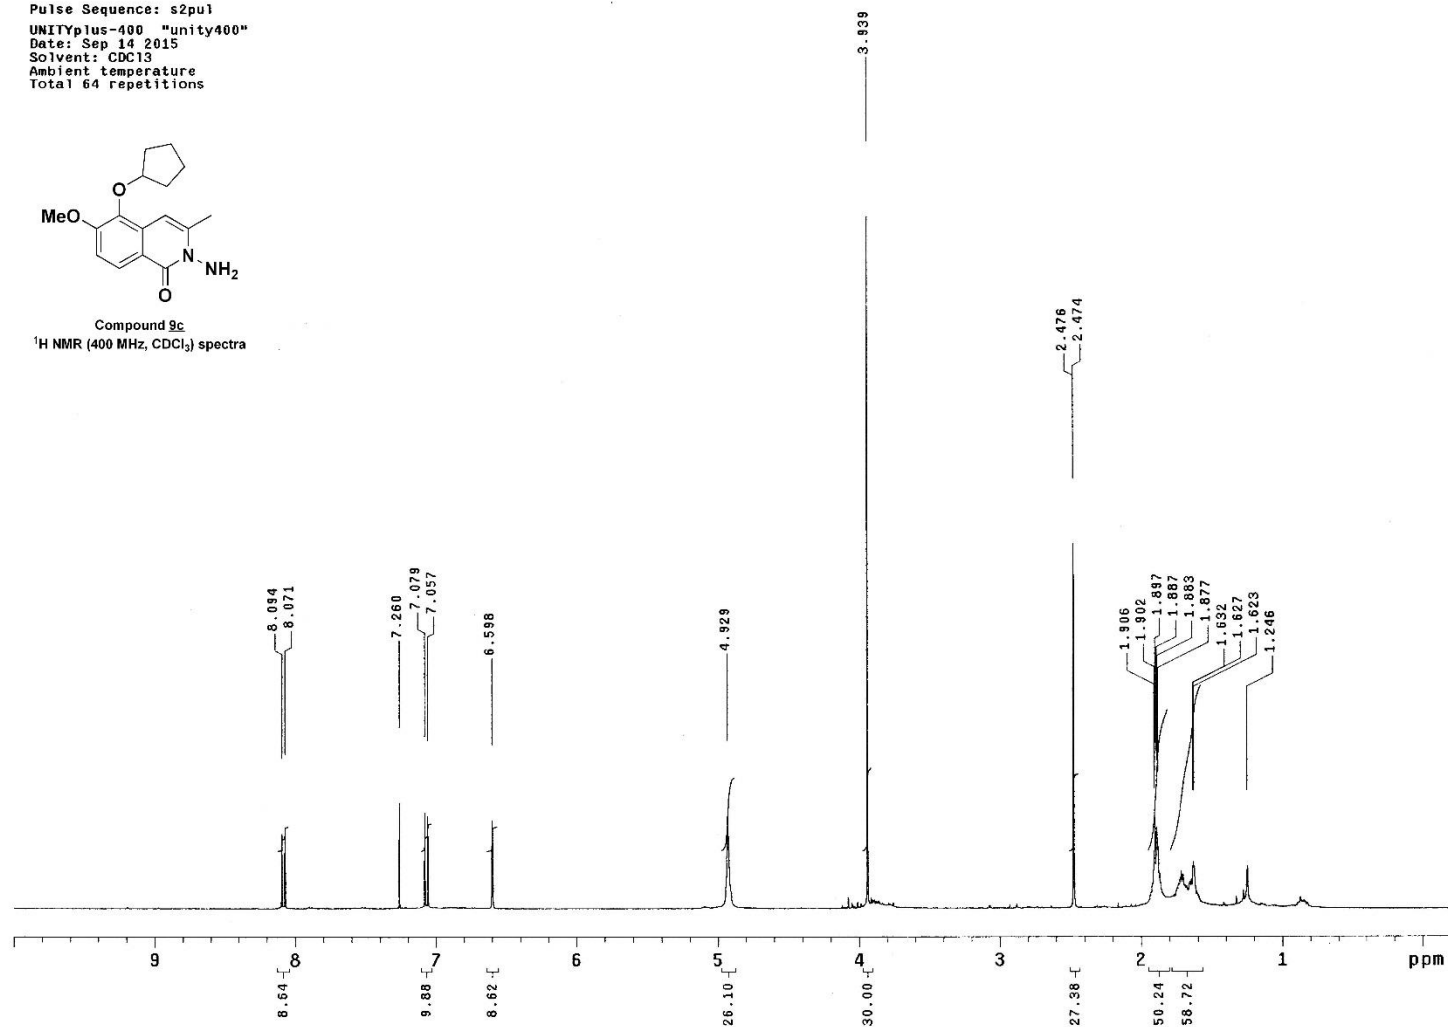



## Compound 9c

YL1040912

Pulse Sequence: s2pu1  
UNITYplus-400 "unity400"  
Date: Sep 14 2015  
Solvent: CDCl<sub>3</sub>  
Ambient temperature  
Total 64 repetitions



Compound 9c  
<sup>1</sup>H NMR (400 MHz, CDCl<sub>3</sub>) spectra

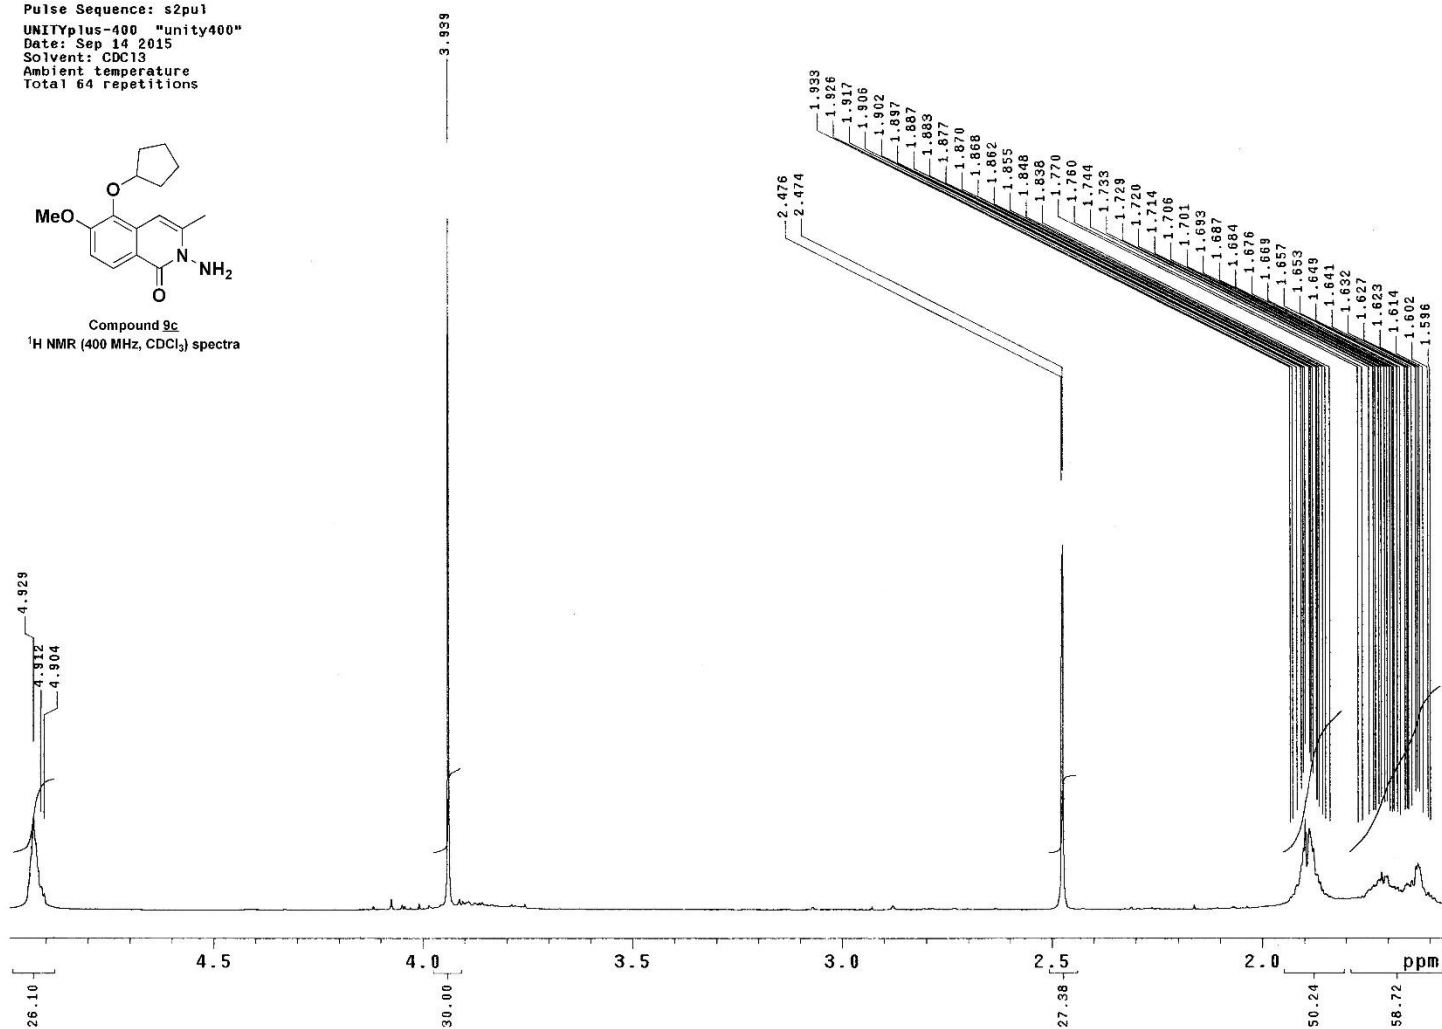

## Compound 9c

YL1040912

Pulse Sequence: s2pu1  
UNITYplus-400 "unity400"  
Date: Sep 14 2015  
Solvent: CDCl<sub>3</sub>  
Ambient temperature  
Total 4448 repetitions

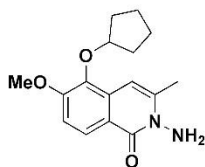

Compound 9c  
<sup>13</sup>C NMR (100 MHz, CDCl<sub>3</sub>) spectra

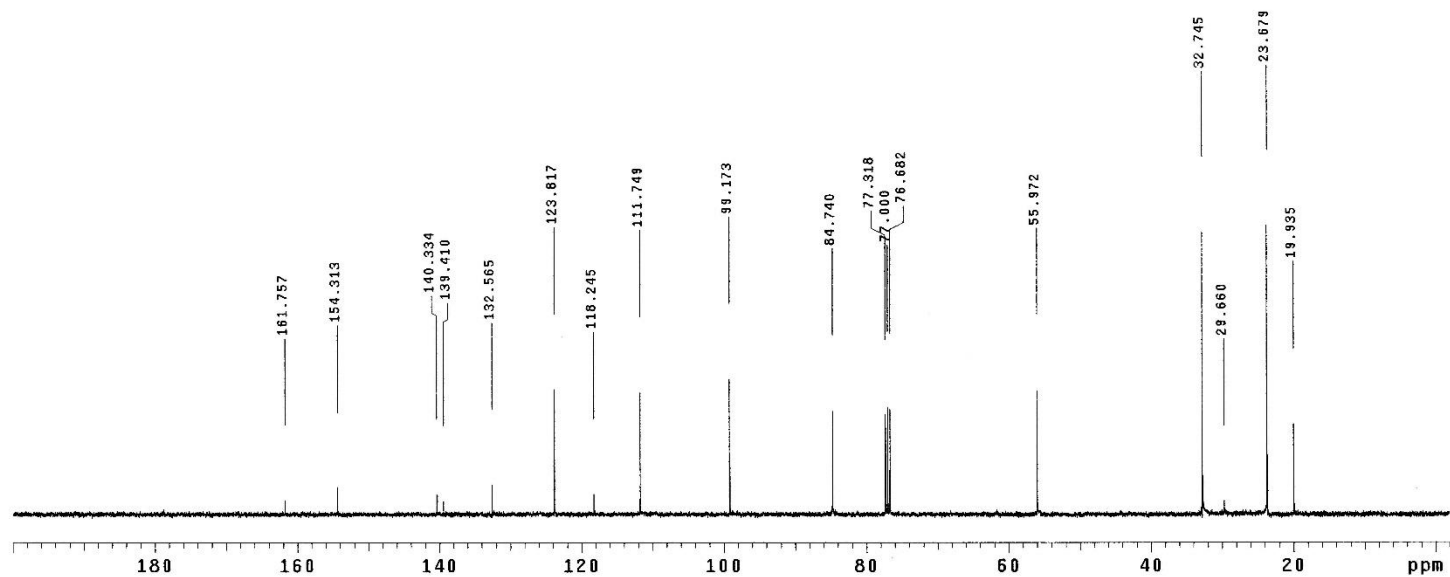

## Compound 9d

YL1040931

Pulse Sequence: s2pul

UNITYplus-400 "unity400"

Date: Oct 6 2015

Solvent: CDCl<sub>3</sub>

Ambient temperature

Total 64 repetitions

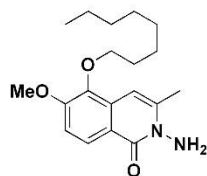

Compound 9d

<sup>1</sup>H NMR (400 MHz, CDCl<sub>3</sub>) spectra

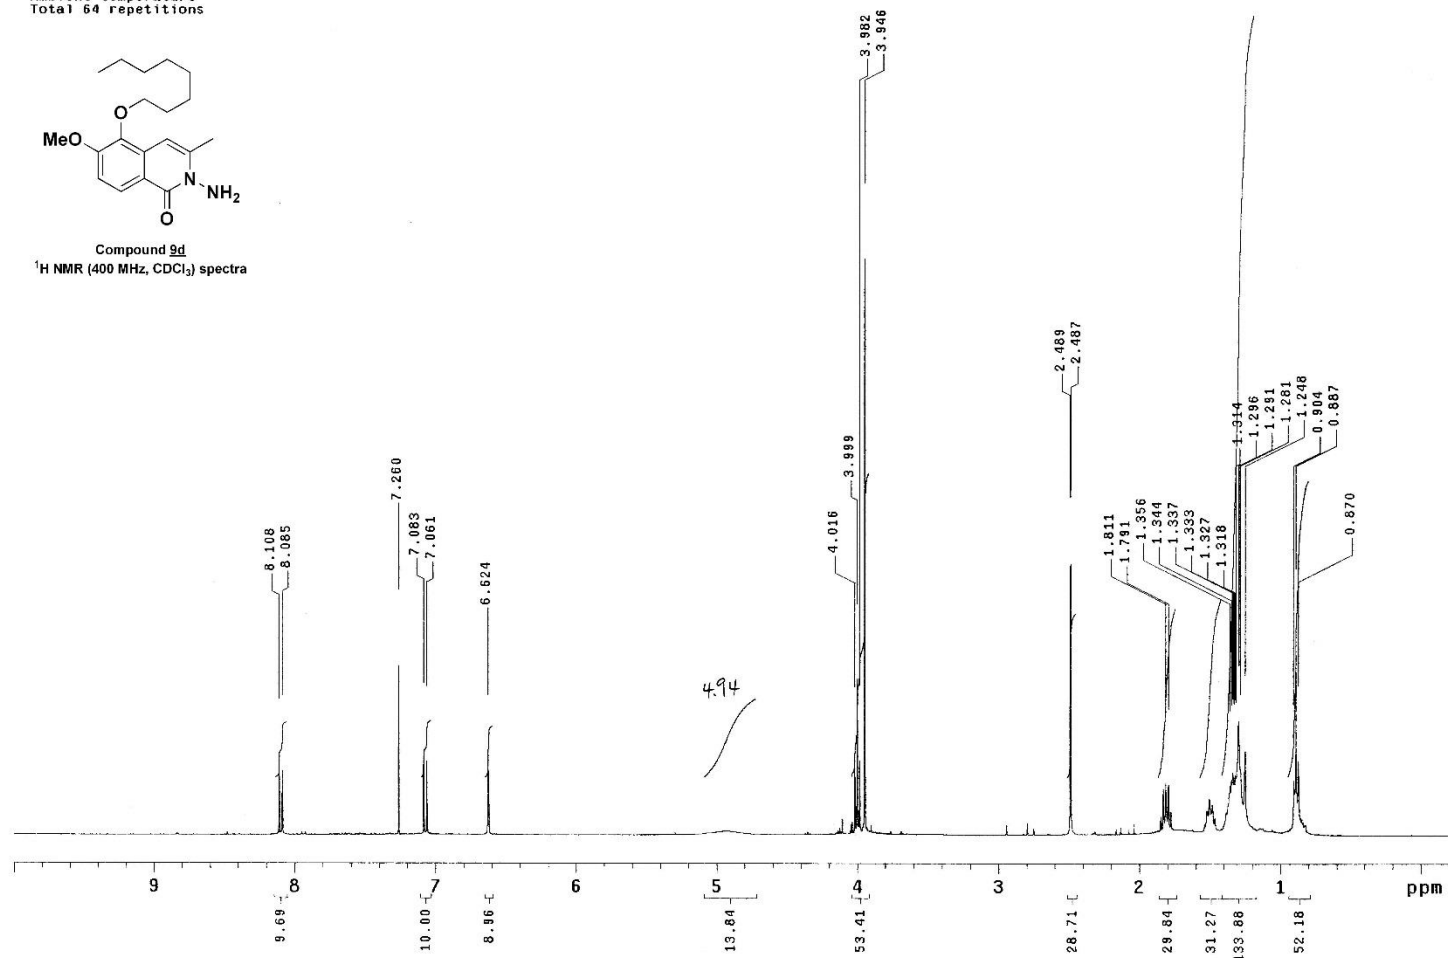

## Compound 9d

YL1040931

Pulse Sequence: s2pul

UNITYplus-400 "unity400"

Date: Oct 6 2015

Solvent: CDCl<sub>3</sub>

Ambient temperature

Total 64 repetitions

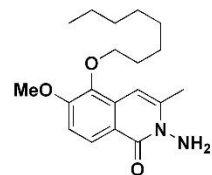

Compound 9d

<sup>1</sup>H NMR (400 MHz, CDCl<sub>3</sub>) spectra

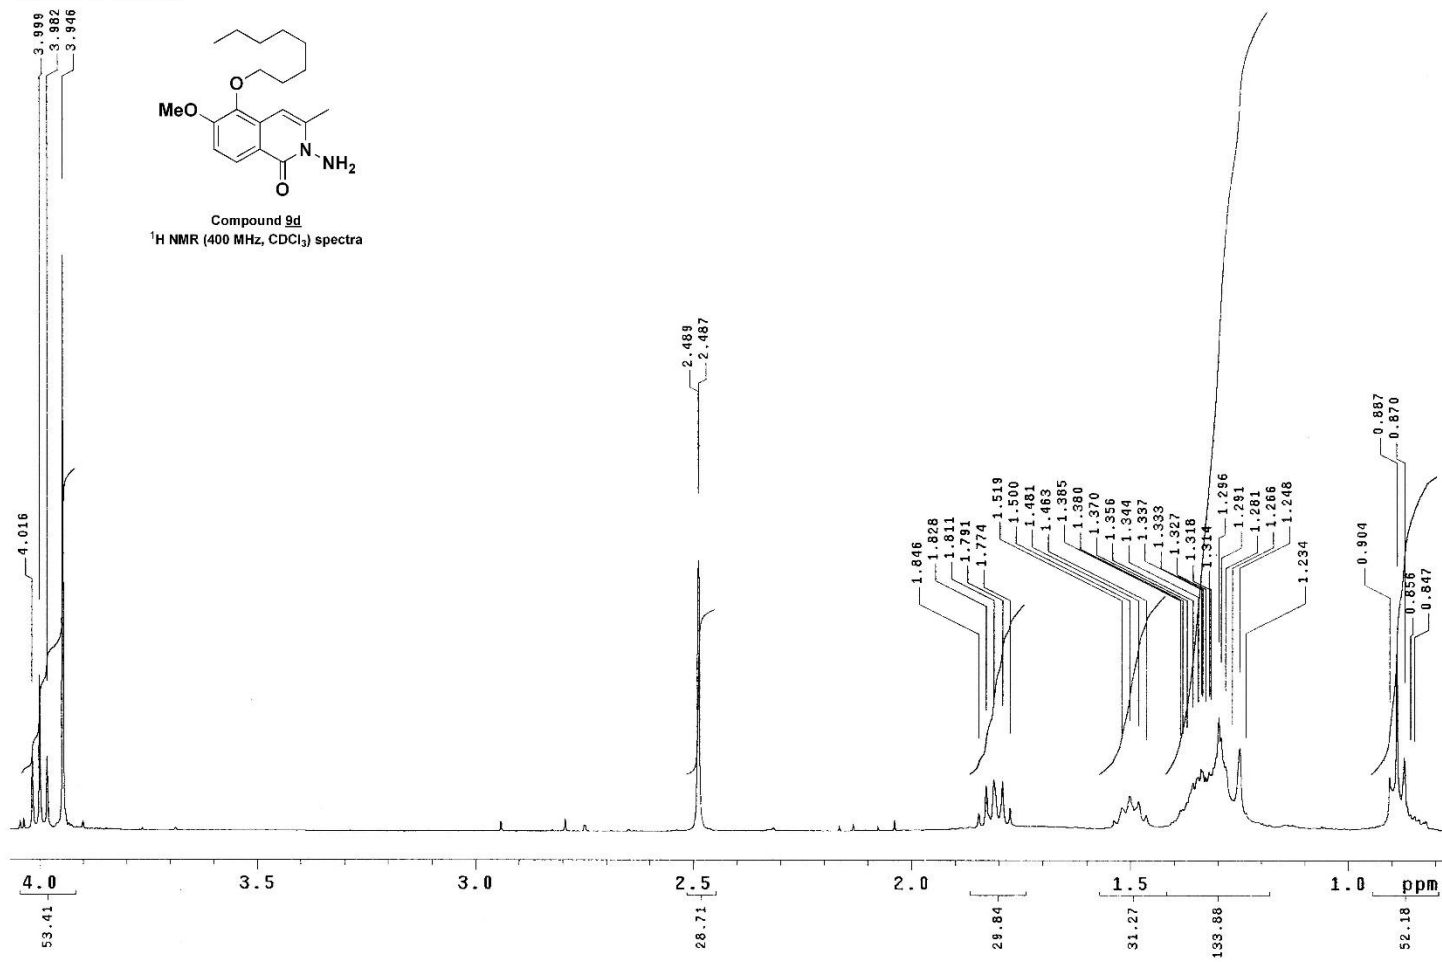

## Compound 9d

YL1040931

Pulse Sequence: s2pul  
UNITYplus-400 "unity400"  
Date: Oct 6 2015  
Solvent: CDCl<sub>3</sub>  
Ambient temperature  
Total 4272 repetitions

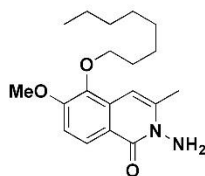

Compound 9d

<sup>13</sup>C NMR (100 MHz, CDCl<sub>3</sub>) spectra

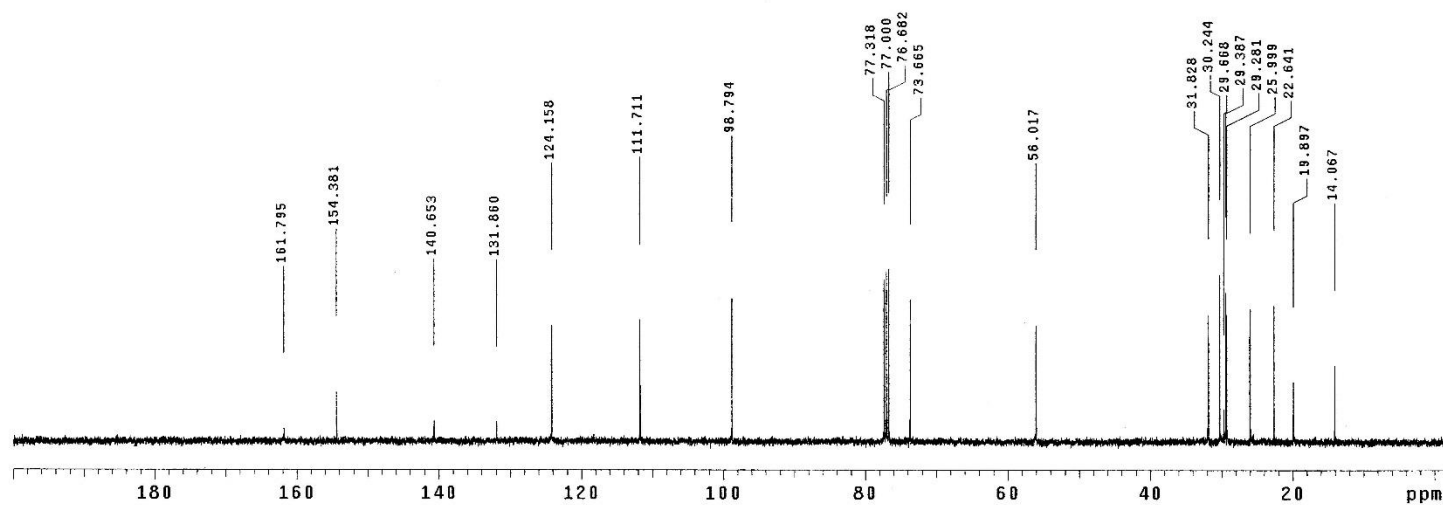

## Compound 9d

YL1040931

Pulse Sequence: s2pul  
UNITYplus-400 "unity400"  
Date: Oct 6 2015  
Solvent: CDCl<sub>3</sub>  
Ambient temperature  
Total 4272 repetitions



Compound 9d

<sup>13</sup>C NMR (100 MHz, CDCl<sub>3</sub>) spectra

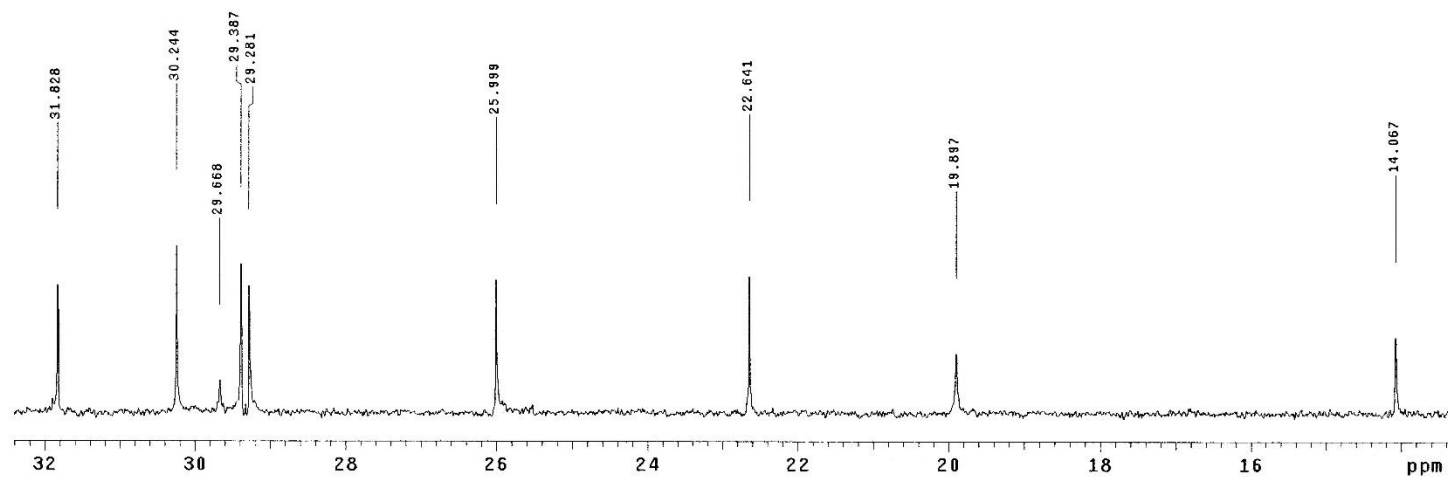

## Compound 10

YL1041021

Pulse Sequence: s2pul

UNITYplus-400 "unity400"

Date: Oct 22 2015

Solvent: CDCl<sub>3</sub>

Ambient temperature

Total 64 repetitions

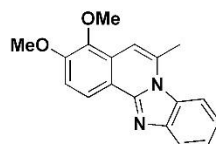

Compound 10

<sup>1</sup>H NMR (400 MHz, CDCl<sub>3</sub>) spectra

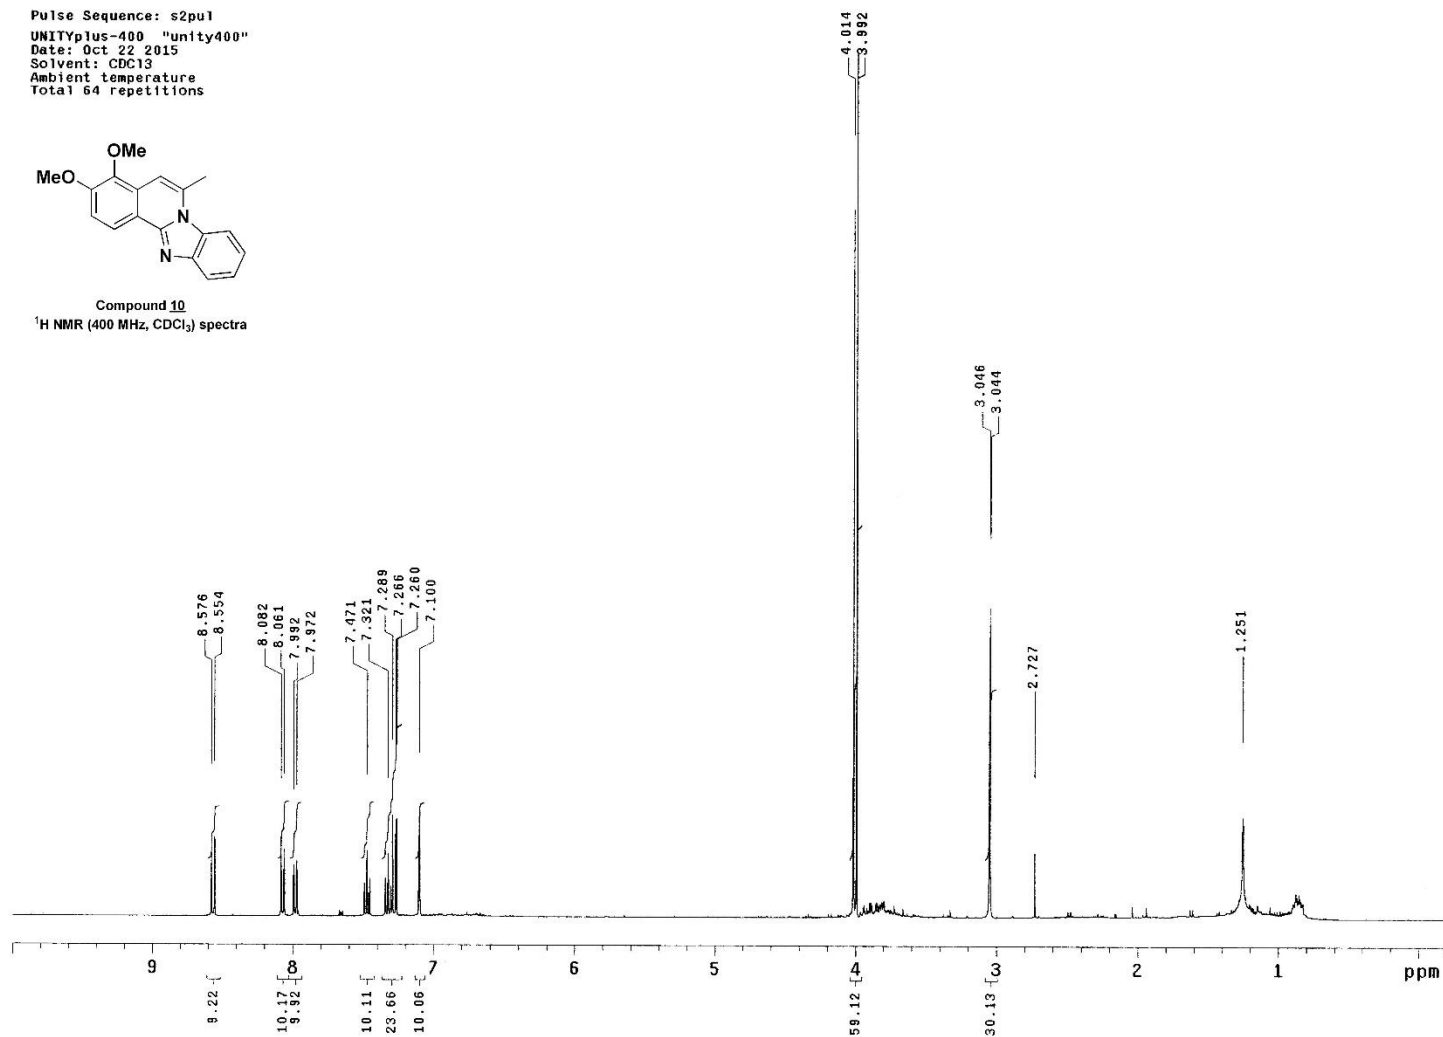

## Compound 10

YL1041021

Pulse Sequence: s2pul

UNITYplus-400 "unity400"

Date: Oct 22 2015

Solvent: CDCl<sub>3</sub>

Ambient temperature

Total 64 repetitions

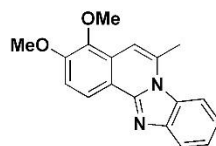

Compound 10

<sup>1</sup>H NMR (400 MHz, CDCl<sub>3</sub>) spectra

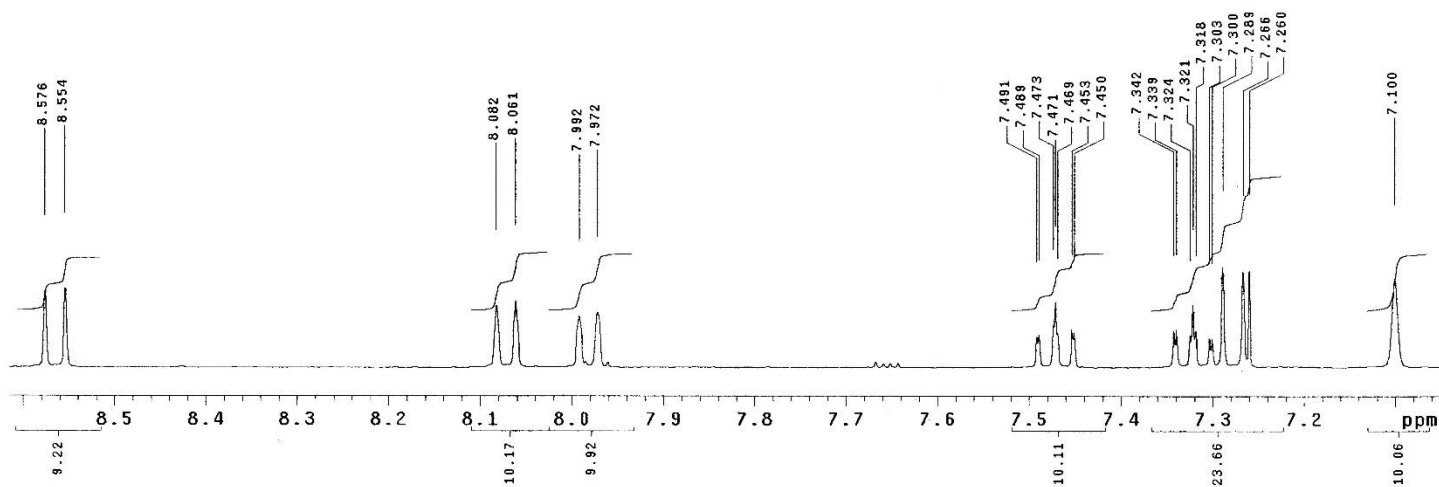



## Compound 10

YL1041021

Pulse Sequence: s2pul  
UNITYplus-400 "unity400"  
Date: Oct 22 2015  
Solvent: CDCl<sub>3</sub>  
Ambient temperature  
Total 12800 repetitions

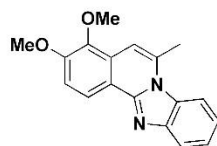

Compound 10

<sup>13</sup>C NMR (100 MHz, CDCl<sub>3</sub>) spectra

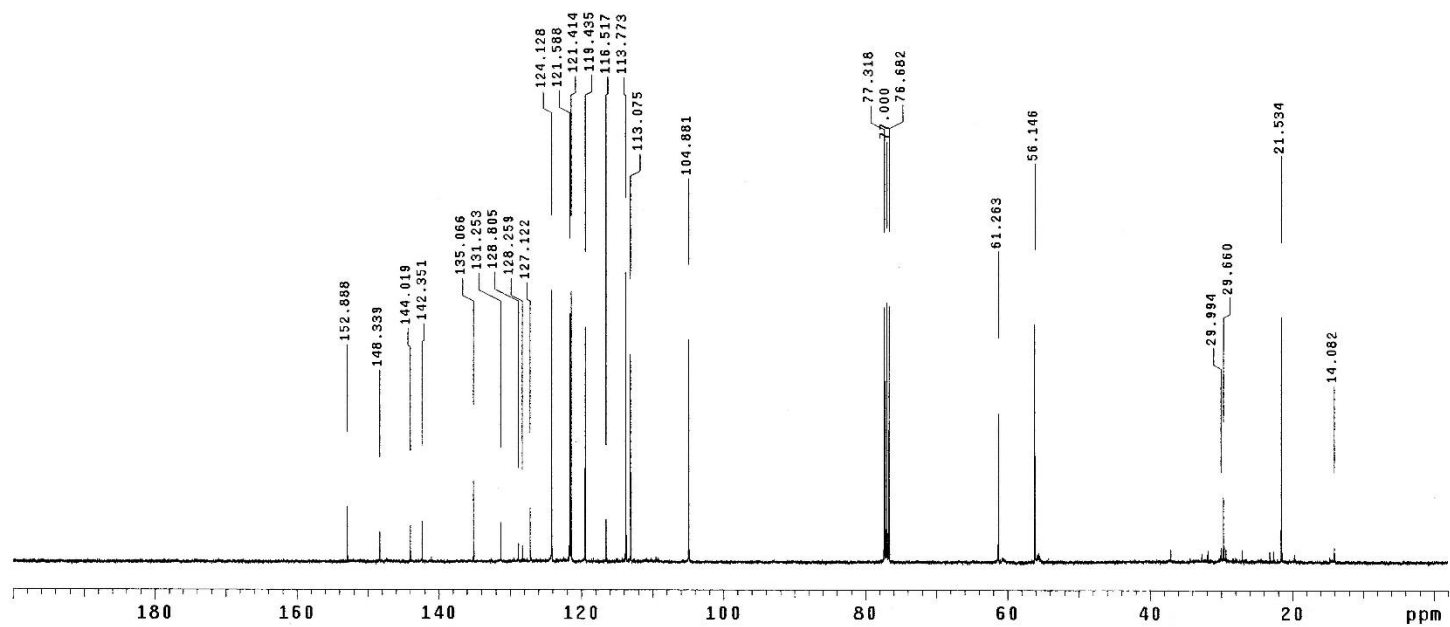

## Compound 10

YL1041021

Pulse Sequence: s2pul  
UNITYplus-400 "unity400"  
Date: Oct 22 2015  
Solvent: CDCl<sub>3</sub>  
Ambient temperature  
Total 12800 repetitions



Compound 10

<sup>13</sup>C NMR (100 MHz, CDCl<sub>3</sub>) spectra

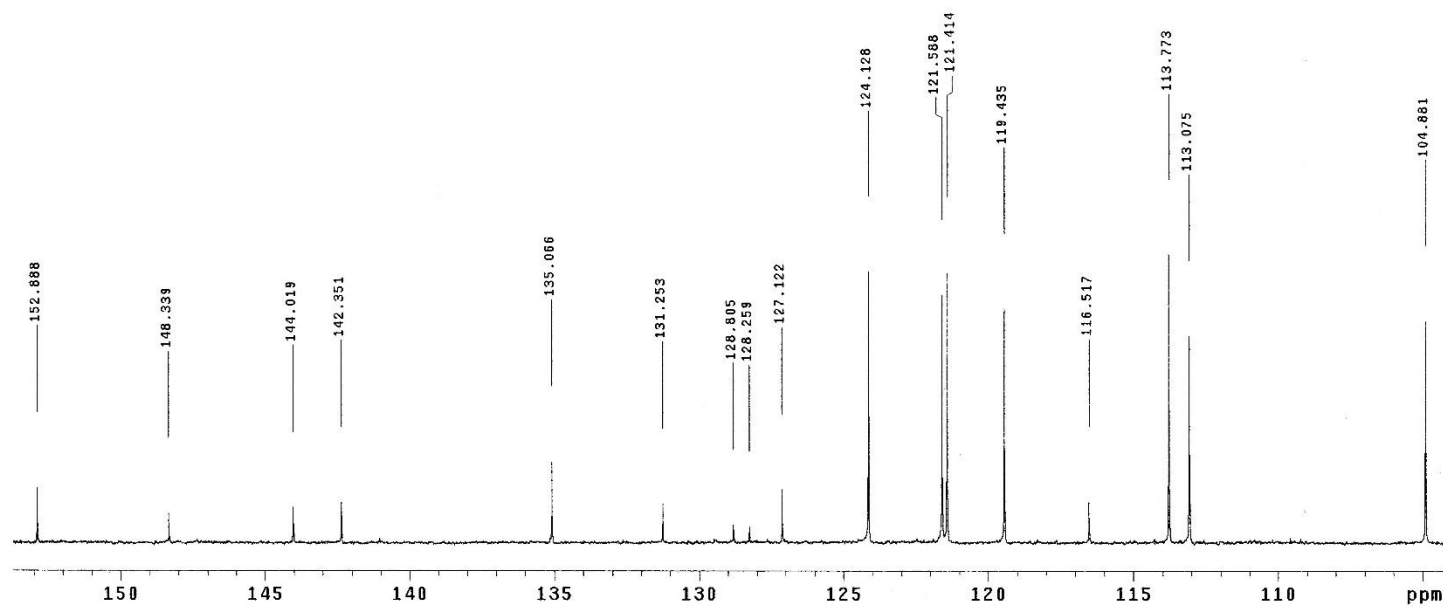

Crystal data and structure refinement for **1a** (the thermal ellipsoid was drawn at the 50% probability level)

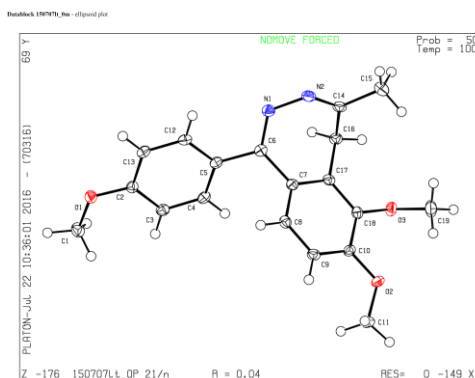

|                                   |                                                                                                          |
|-----------------------------------|----------------------------------------------------------------------------------------------------------|
| Identification code               | 150707lt_0m                                                                                              |
| Empirical formula                 | C <sub>19</sub> H <sub>20</sub> N <sub>2</sub> O <sub>3</sub>                                            |
| Formula weight                    | 324.37                                                                                                   |
| Temperature                       | 100(2) K                                                                                                 |
| Wavelength                        | 0.71073 Å                                                                                                |
| Crystal system, Space group       | Monoclinic, P 2 <sub>1</sub> /n                                                                          |
| Unit cell dimensions              | a = 8.1616(6) Å      α = 90°.<br>b = 8.6757(7) Å      β = 90.485(3)°.<br>c = 22.6247(19) Å      γ = 90°. |
| Volume                            | 1601.9(2) Å <sup>3</sup>                                                                                 |
| Z, Density (calculated)           | 4, 1.345 Mg/m <sup>3</sup>                                                                               |
| Absorption coefficient            | 0.092 mm <sup>-1</sup>                                                                                   |
| F(000)                            | 688                                                                                                      |
| Crystal size                      | 0.12 x 0.10 x 0.10 mm <sup>3</sup>                                                                       |
| Theta range for data collection   | 1.800 to 26.469°.                                                                                        |
| Index ranges                      | -7 ≤ h ≤ 10, -10 ≤ k ≤ 10, -28 ≤ l ≤ 26                                                                  |
| Reflections collected             | 13106                                                                                                    |
| Independent reflections           | 3282 [R(int) = 0.0289]                                                                                   |
| Completeness to theta = 25.242°   | 99.8 %                                                                                                   |
| Absorption correction             | Semi-empirical from equivalents                                                                          |
| Max. and min. transmission        | 0.9485 and 0.8810                                                                                        |
| Refinement method                 | Full-matrix least-squares on F <sup>2</sup>                                                              |
| Data / restraints / parameters    | 3282 / 0 / 221                                                                                           |
| Goodness-of-fit on F <sup>2</sup> | 1.129                                                                                                    |
| Final R indices [I > 2σ(I)]       | R <sub>1</sub> = 0.0356, wR <sub>2</sub> = 0.0970                                                        |
| R indices (all data)              | R <sub>1</sub> = 0.0418, wR <sub>2</sub> = 0.1152                                                        |
| Extinction coefficient            | n/a                                                                                                      |
| Largest diff. peak and hole       | 0.338 and -0.245 e.Å <sup>-3</sup>                                                                       |

Crystal data and structure refinement for **1c** (the thermal ellipsoid was drawn at the 50% probability level)

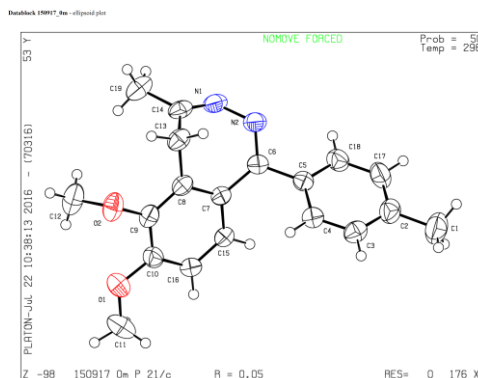

|                                   |                                                               |                  |
|-----------------------------------|---------------------------------------------------------------|------------------|
| Identification code               | 150917_0m                                                     |                  |
| Empirical formula                 | C <sub>19</sub> H <sub>20</sub> N <sub>2</sub> O <sub>2</sub> |                  |
| Formula weight                    | 308.37                                                        |                  |
| Temperature                       | 296(2) K                                                      |                  |
| Wavelength                        | 0.71073 Å                                                     |                  |
| Crystal system, Space group       | Monoclinic, P 2 <sub>1</sub> /c                               |                  |
| Unit cell dimensions              | a = 7.1877(5) Å                                               | α = 90°.         |
|                                   | b = 25.1688(16) Å                                             | β = 110.284(4)°. |
|                                   | c = 9.8090(6) Å                                               | γ = 90°.         |
| Volume                            | 1664.46(19) Å <sup>3</sup>                                    |                  |
| Z, Density (calculated)           | 4, 1.231 Mg/m <sup>3</sup>                                    |                  |
| Absorption coefficient            | 0.081 mm <sup>-1</sup>                                        |                  |
| F(000)                            | 656                                                           |                  |
| Crystal size                      | 0.20 x 0.15 x 0.15 mm <sup>3</sup>                            |                  |
| Theta range for data collection   | 1.618 to 26.408°.                                             |                  |
| Index ranges                      | -8 ≤ h ≤ 6, -31 ≤ k ≤ 30, -12 ≤ l ≤ 12                        |                  |
| Reflections collected             | 13538                                                         |                  |
| Independent reflections           | 3399 [R(int) = 0.0362]                                        |                  |
| Completeness to theta = 25.242°   | 99.9 %                                                        |                  |
| Absorption correction             | Semi-empirical from equivalents                               |                  |
| Max. and min. transmission        | 0.9485 and 0.8499                                             |                  |
| Refinement method                 | Full-matrix least-squares on F <sup>2</sup>                   |                  |
| Data / restraints / parameters    | 3399 / 0 / 212                                                |                  |
| Goodness-of-fit on F <sup>2</sup> | 1.030                                                         |                  |
| Final R indices [I > 2σ(I)]       | R <sub>1</sub> = 0.0481, wR <sub>2</sub> = 0.1186             |                  |
| R indices (all data)              | R <sub>1</sub> = 0.0649, wR <sub>2</sub> = 0.1299             |                  |
| Extinction coefficient            | n/a                                                           |                  |
| Largest diff. peak and hole       | 0.166 and -0.167 e.Å <sup>-3</sup>                            |                  |

Crystal data and structure refinement for **1p** (the thermal ellipsoid was drawn at the 50% probability level)

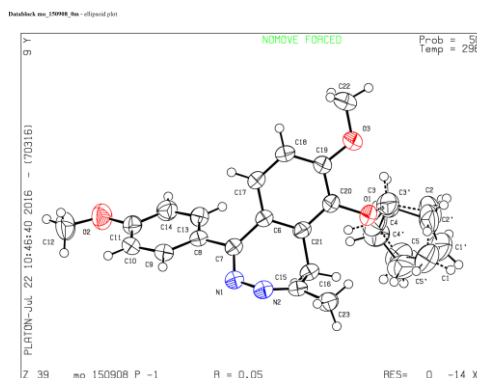

|                                   |                                                                                                                     |
|-----------------------------------|---------------------------------------------------------------------------------------------------------------------|
| Identification code               | mo_150908_0m                                                                                                        |
| Empirical formula                 | C <sub>23</sub> H <sub>26</sub> N <sub>2</sub> O <sub>3</sub>                                                       |
| Formula weight                    | 378.46                                                                                                              |
| Temperature                       | 296(2) K                                                                                                            |
| Wavelength                        | 0.71073 Å                                                                                                           |
| Crystal system, Space group       | Triclinic, P -1                                                                                                     |
| Unit cell dimensions              | a = 8.4384(6) Å      α = 70.841(2)°<br>b = 11.0458(8) Å      β = 77.317(2)°<br>c = 12.1243(8) Å      γ = 86.918(2)° |
| Volume                            | 1041.25(13) Å <sup>3</sup>                                                                                          |
| Z, Density (calculated)           | 2, 1.207 Mg/m <sup>3</sup>                                                                                          |
| Absorption coefficient            | 0.080 mm <sup>-1</sup>                                                                                              |
| F(000)                            | 404                                                                                                                 |
| Crystal size                      | 0.25 x 0.20 x 0.20 mm <sup>3</sup>                                                                                  |
| Theta range for data collection   | 1.820 to 26.514°.                                                                                                   |
| Index ranges                      | -10 ≤ h ≤ 10, -13 ≤ k ≤ 13, -11 ≤ l ≤ 15                                                                            |
| Reflections collected             | 17072                                                                                                               |
| Independent reflections           | 4298 [R(int) = 0.0330]                                                                                              |
| Completeness to theta = 25.242°   | 99.8 %                                                                                                              |
| Absorption correction             | Semi-empirical from equivalents                                                                                     |
| Max. and min. transmission        | 0.9485 and 0.8948                                                                                                   |
| Refinement method                 | Full-matrix least-squares on F <sup>2</sup>                                                                         |
| Data / restraints / parameters    | 4298 / 180 / 302                                                                                                    |
| Goodness-of-fit on F <sup>2</sup> | 1.040                                                                                                               |
| Final R indices [I > 2σ(I)]       | R1 = 0.0473, wR2 = 0.1277                                                                                           |
| R indices (all data)              | R1 = 0.0710, wR2 = 0.1461                                                                                           |
| Extinction coefficient            | n/a                                                                                                                 |
| Largest diff. peak and hole       | 0.253 and -0.175 e.Å <sup>-3</sup>                                                                                  |

Crystal data and structure refinement for **7y** (the thermal ellipsoid was drawn at the 50% probability level)

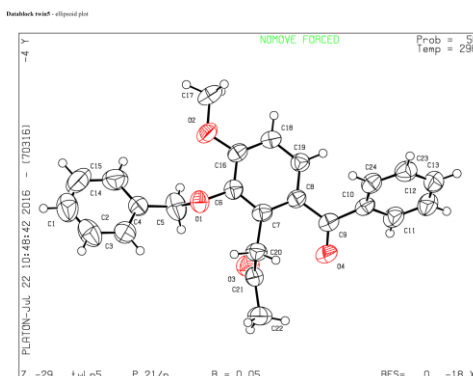

|                                   |                                                                                                          |
|-----------------------------------|----------------------------------------------------------------------------------------------------------|
| Identification code               | twin5                                                                                                    |
| Empirical formula                 | C <sub>24</sub> H <sub>22</sub> O <sub>4</sub>                                                           |
| Formula weight                    | 374.41                                                                                                   |
| Temperature                       | 296(2) K                                                                                                 |
| Wavelength                        | 0.71073 Å                                                                                                |
| Crystal system, Space group       | Monoclinic, P 2 <sub>1</sub> /n                                                                          |
| Unit cell dimensions              | a = 11.5472(5) Å      α = 90°.<br>b = 9.5808(3) Å      β = 95.831(2)°.<br>c = 17.8875(7) Å      γ = 90°. |
| Volume                            | 1968.68(13) Å <sup>3</sup>                                                                               |
| Z, Density (calculated)           | 4, 1.263 Mg/m <sup>3</sup>                                                                               |
| Absorption coefficient            | 0.085 mm <sup>-1</sup>                                                                                   |
| F(000)                            | 792                                                                                                      |
| Crystal size                      | 0.20 x 0.15 x 0.12 mm <sup>3</sup>                                                                       |
| Theta range for data collection   | 2.010 to 26.422°.                                                                                        |
| Index ranges                      | -14 ≤ h ≤ 14, 0 ≤ k ≤ 11, 0 ≤ l ≤ 22                                                                     |
| Reflections collected             | 4099                                                                                                     |
| Independent reflections           | 4099 [R(int) = 0.0387]                                                                                   |
| Completeness to theta = 25.242°   | 99.9 %                                                                                                   |
| Absorption correction             | Semi-empirical from equivalents                                                                          |
| Max. and min. transmission        | 0.9485 and 0.7768                                                                                        |
| Refinement method                 | Full-matrix least-squares on F <sup>2</sup>                                                              |
| Data / restraints / parameters    | 4099 / 0 / 256                                                                                           |
| Goodness-of-fit on F <sup>2</sup> | 1.082                                                                                                    |
| Final R indices [I > 2σ(I)]       | R1 = 0.0547, wR2 = 0.1499                                                                                |
| R indices (all data)              | R1 = 0.0882, wR2 = 0.1806                                                                                |
| Extinction coefficient            | n/a                                                                                                      |
| Largest diff. peak and hole       | 0.247 and -0.242 e.Å <sup>-3</sup>                                                                       |

Crystal data and structure refinement for **9a** (the thermal ellipsoid was drawn at the 50% probability level)

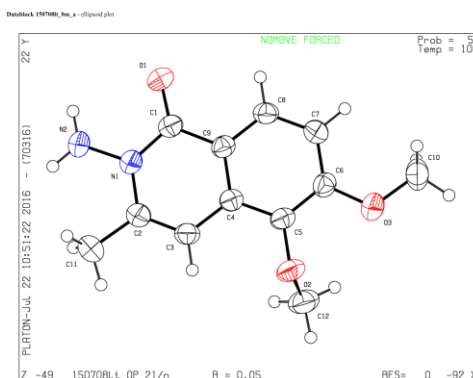

|                                   |                                                                                                           |
|-----------------------------------|-----------------------------------------------------------------------------------------------------------|
| Identification code               | 150708lt_0m_a                                                                                             |
| Empirical formula                 | C <sub>12</sub> H <sub>14</sub> N <sub>2</sub> O <sub>3</sub>                                             |
| Formula weight                    | 234.25                                                                                                    |
| Temperature                       | 100(2) K                                                                                                  |
| Wavelength                        | 0.71073 Å                                                                                                 |
| Crystal system, Space group       | Monoclinic, P 2 <sub>1</sub> /n                                                                           |
| Unit cell dimensions              | a = 15.2093(9) Å      α = 90°.<br>b = 4.0297(2) Å      β = 90.067(3)°.<br>c = 18.2902(11) Å      γ = 90°. |
| Volume                            | 1120.99(11) Å <sup>3</sup>                                                                                |
| Z, Density (calculated)           | 4, 1.388 Mg/m <sup>3</sup>                                                                                |
| Absorption coefficient            | 0.101 mm <sup>-1</sup>                                                                                    |
| F(000)                            | 496                                                                                                       |
| Crystal size                      | 0.20 x 0.08 x 0.08 mm <sup>3</sup>                                                                        |
| Theta range for data collection   | 1.740 to 26.321°.                                                                                         |
| Index ranges                      | -18 ≤ h ≤ 18, -4 ≤ k ≤ 5, -22 ≤ l ≤ 22                                                                    |
| Reflections collected             | 9387                                                                                                      |
| Independent reflections           | 2258 [R(int) = 0.0243]                                                                                    |
| Completeness to theta = 25.242°   | 99.9 %                                                                                                    |
| Absorption correction             | Semi-empirical from equivalents                                                                           |
| Max. and min. transmission        | 0.9485 and 0.8866                                                                                         |
| Refinement method                 | Full-matrix least-squares on F <sup>2</sup>                                                               |
| Data / restraints / parameters    | 2258 / 0 / 157                                                                                            |
| Goodness-of-fit on F <sup>2</sup> | 1.098                                                                                                     |
| Final R indices [I > 2σ(I)]       | R <sub>1</sub> = 0.0491, wR <sub>2</sub> = 0.1559                                                         |
| R indices (all data)              | R <sub>1</sub> = 0.0662, wR <sub>2</sub> = 0.1878                                                         |
| Extinction coefficient            | n/a                                                                                                       |
| Largest diff. peak and hole       | 0.378 and -0.465 e.Å <sup>-3</sup>                                                                        |
